# Supplementary material for: Tracking SARS-CoV-2 Spike Protein Mutations in the United States (January 2020—March 2021) Using a Statistical Learning Strategy
Source: MDPI journal article supplement (doi:10.3390/v14010009), 2021-12-21
Supplement: s1 [file s1]

# Supplementary Materials for “Tracking SARS-CoV-2 Spike Protein Mutations in the United States (January 2020 – March 2021) Using a Statistical Learning Strategy” by Zhao et al.

## Contents

|                                                                                                                                                                                                                                                                                                                |    |
|----------------------------------------------------------------------------------------------------------------------------------------------------------------------------------------------------------------------------------------------------------------------------------------------------------------|----|
| Figure S1. For all Spike residues with sufficient variation, scatterplots of the maximum proportion (Pmax) of sequences from a given state/territory harboring a mutation at a given AA position vs. q-value.....                                                                                              | 2  |
| Figure S2. Temporal patterns of VRVs identified in each state/territory .....                                                                                                                                                                                                                                  | 11 |
| Figure S3. Locally averaged proportions over time for substitutions at 3 AA-subs in a VOI (Y144, F888, V1176) and at 3 AA-subs in a VOC (H69, Y144, K417) that were not detected by the SLS method in states/territories where at least three sequences had a substitution at the designated AA position ..... | 24 |
| Figure S4. Presence of VRVs among all cases in each state/territory. ....                                                                                                                                                                                                                                      | 25 |
| Table S1. Distribution of the 21,391 VOI/VOC sequences by specific variant and by state/territory. ....                                                                                                                                                                                                        | 32 |
| Table S2. Distribution of the 167,893 SARS-CoV-2 sequences by state/territory and by GISAID submission month, along with state/territory-specific distribution of the 21,391 VOI/VOC excluded sequences. ....                                                                                                  | 33 |
| Table S3. The 10 identified geo-VRV clusters (TP1 through TP10), based on temporal profiles. ....                                                                                                                                                                                                              | 34 |
| Table S4. Frequencies of the 90 viral residue variants (VRVs) by state/territory, from an unsupervised learning from bi-clustering of all States and VRVs.....                                                                                                                                                 | 39 |
| Table S5. VRV-haplotypes identified within each state/territory, along with state/territory-specific frequencies. The “positivity” column indicates the proportion of mutations in each haplotype block. ....                                                                                                  | 42 |
| Table S6. List of individuals from the Originating laboratories responsible for obtaining the specimens and the Submitting laboratories where genetic sequence data were generated and shared via the GISAID Initiative, on which this research is based.....                                                  | 49 |

**Figure S1. For all Spike residues with sufficient variation, scatterplots of the maximum proportion (Pmax) of sequences from a given state/territory harboring a mutation at a given amino acid position vs. q-value.**

Points in red represent residues that meet both criteria for classification as a VRV. Points in black represent residues that do not.

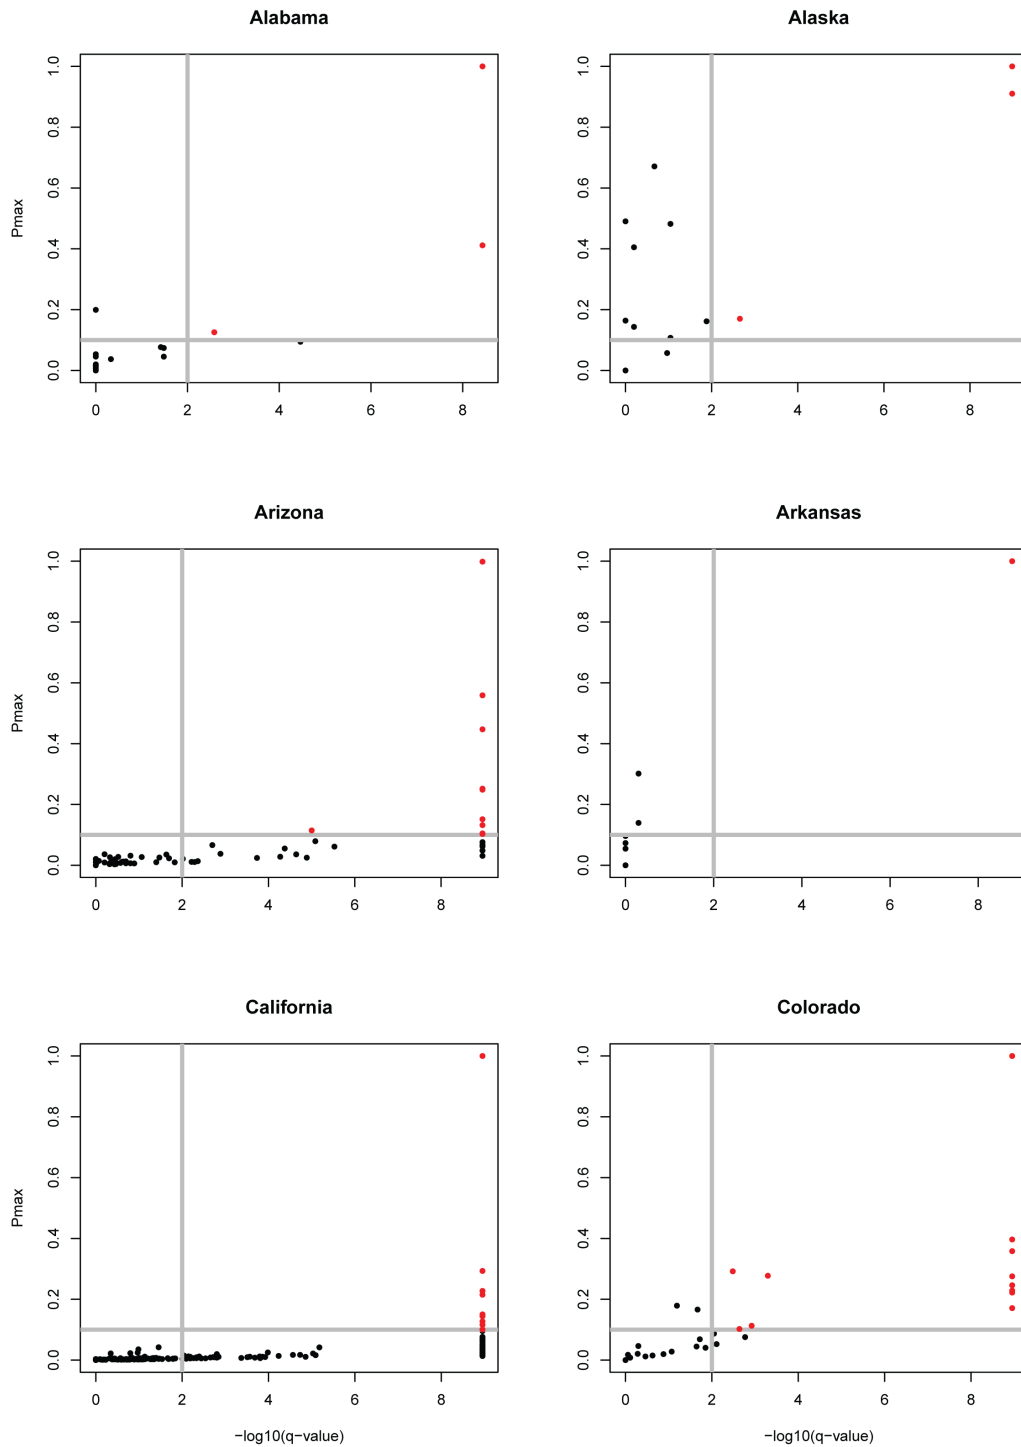

Figure S1 (continued).

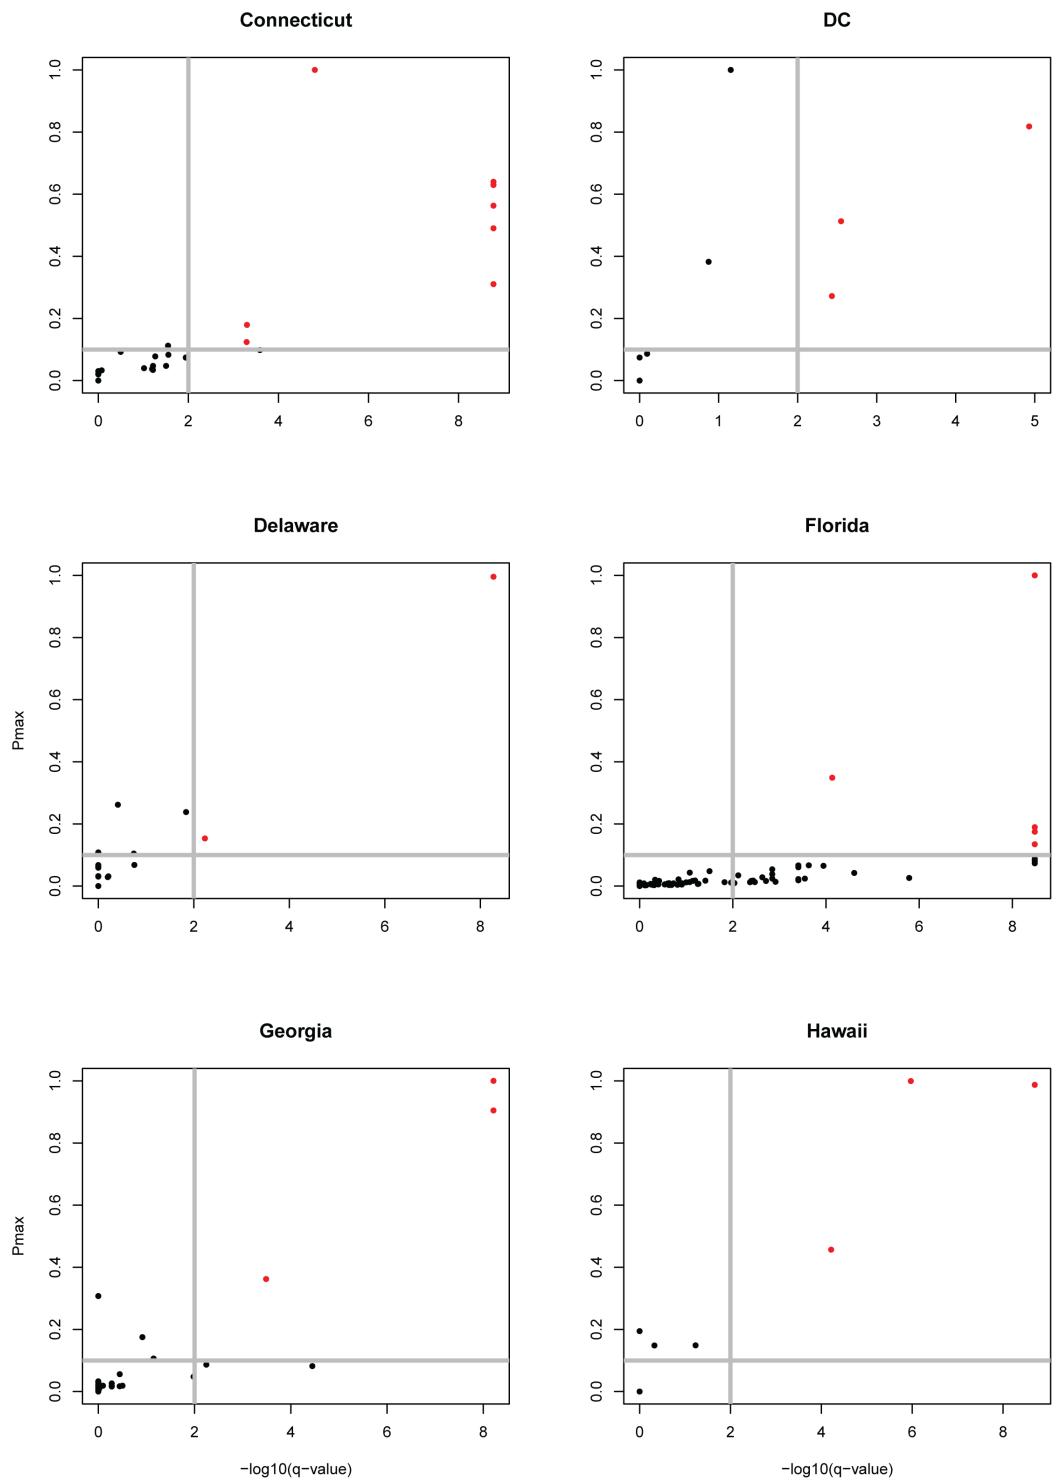

Figure S1 (continued).

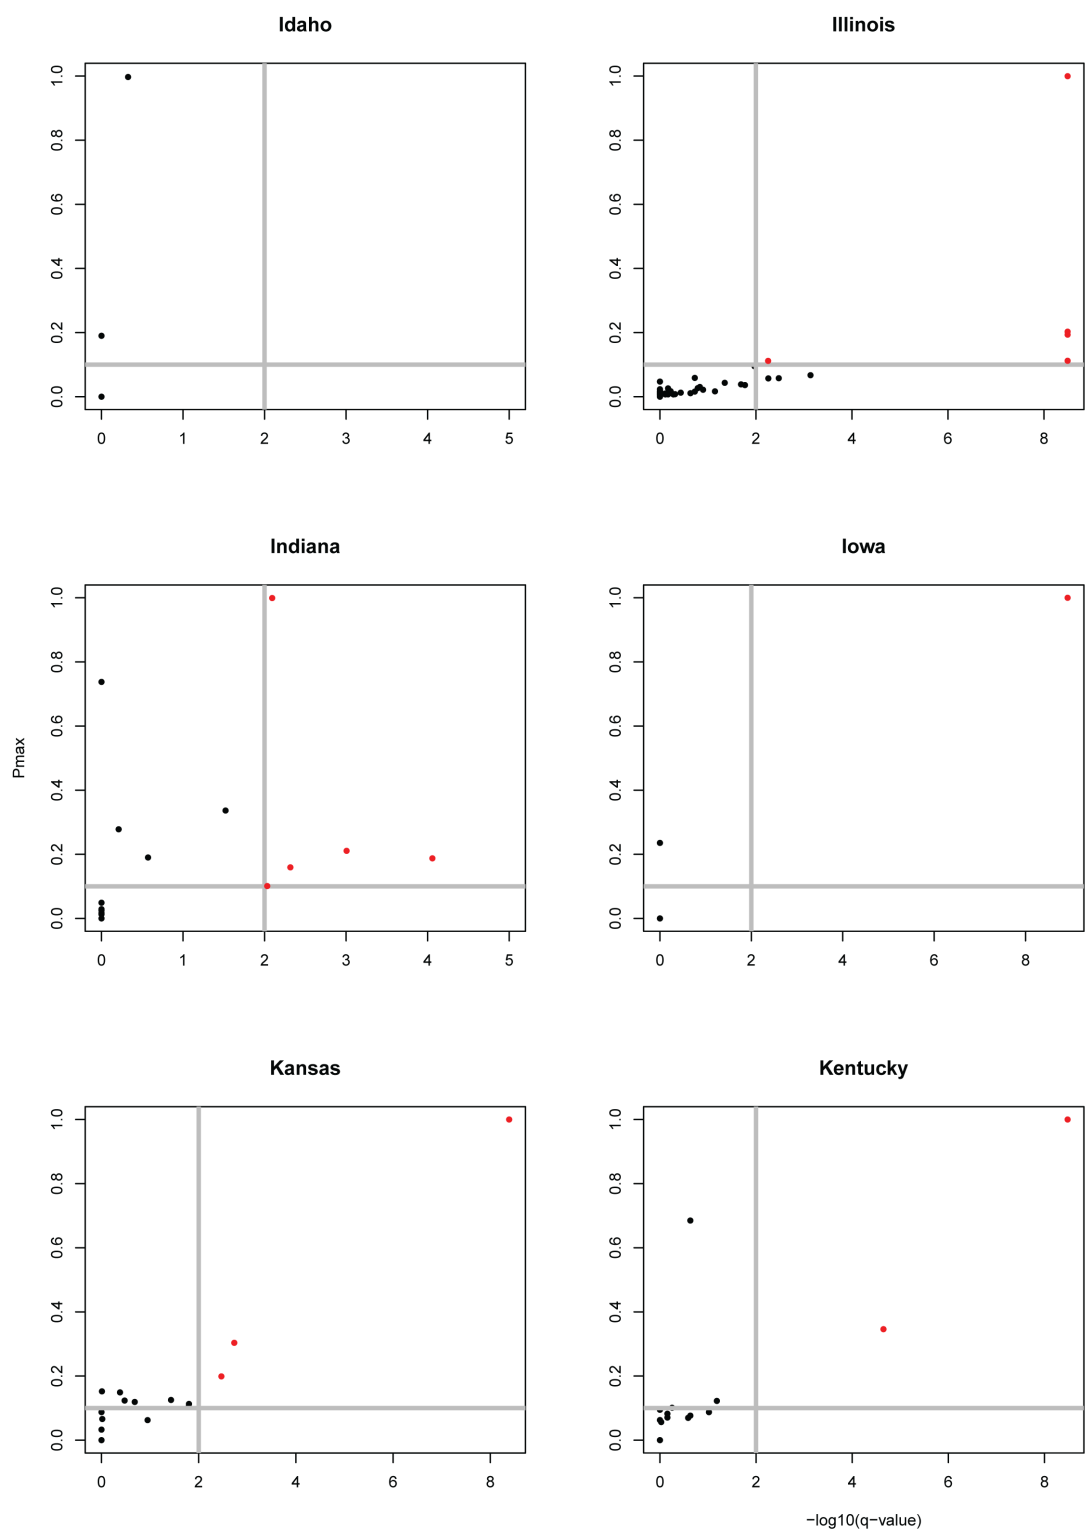



Figure S1 (continued).

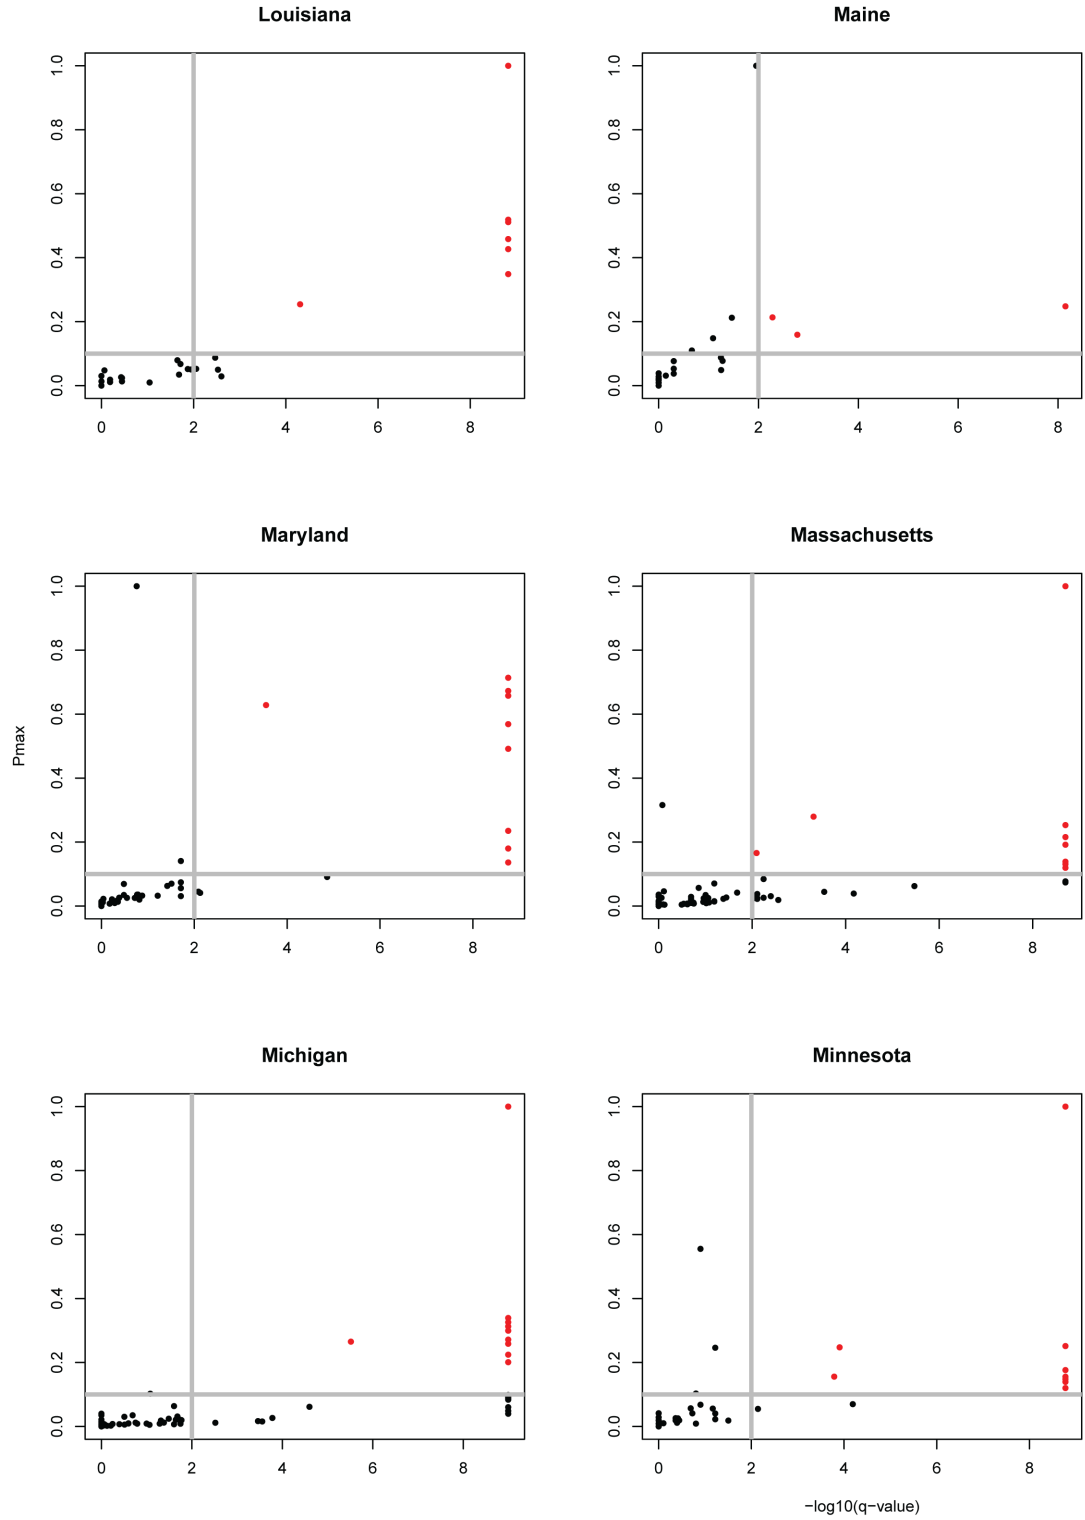

Figure S1 (continued).

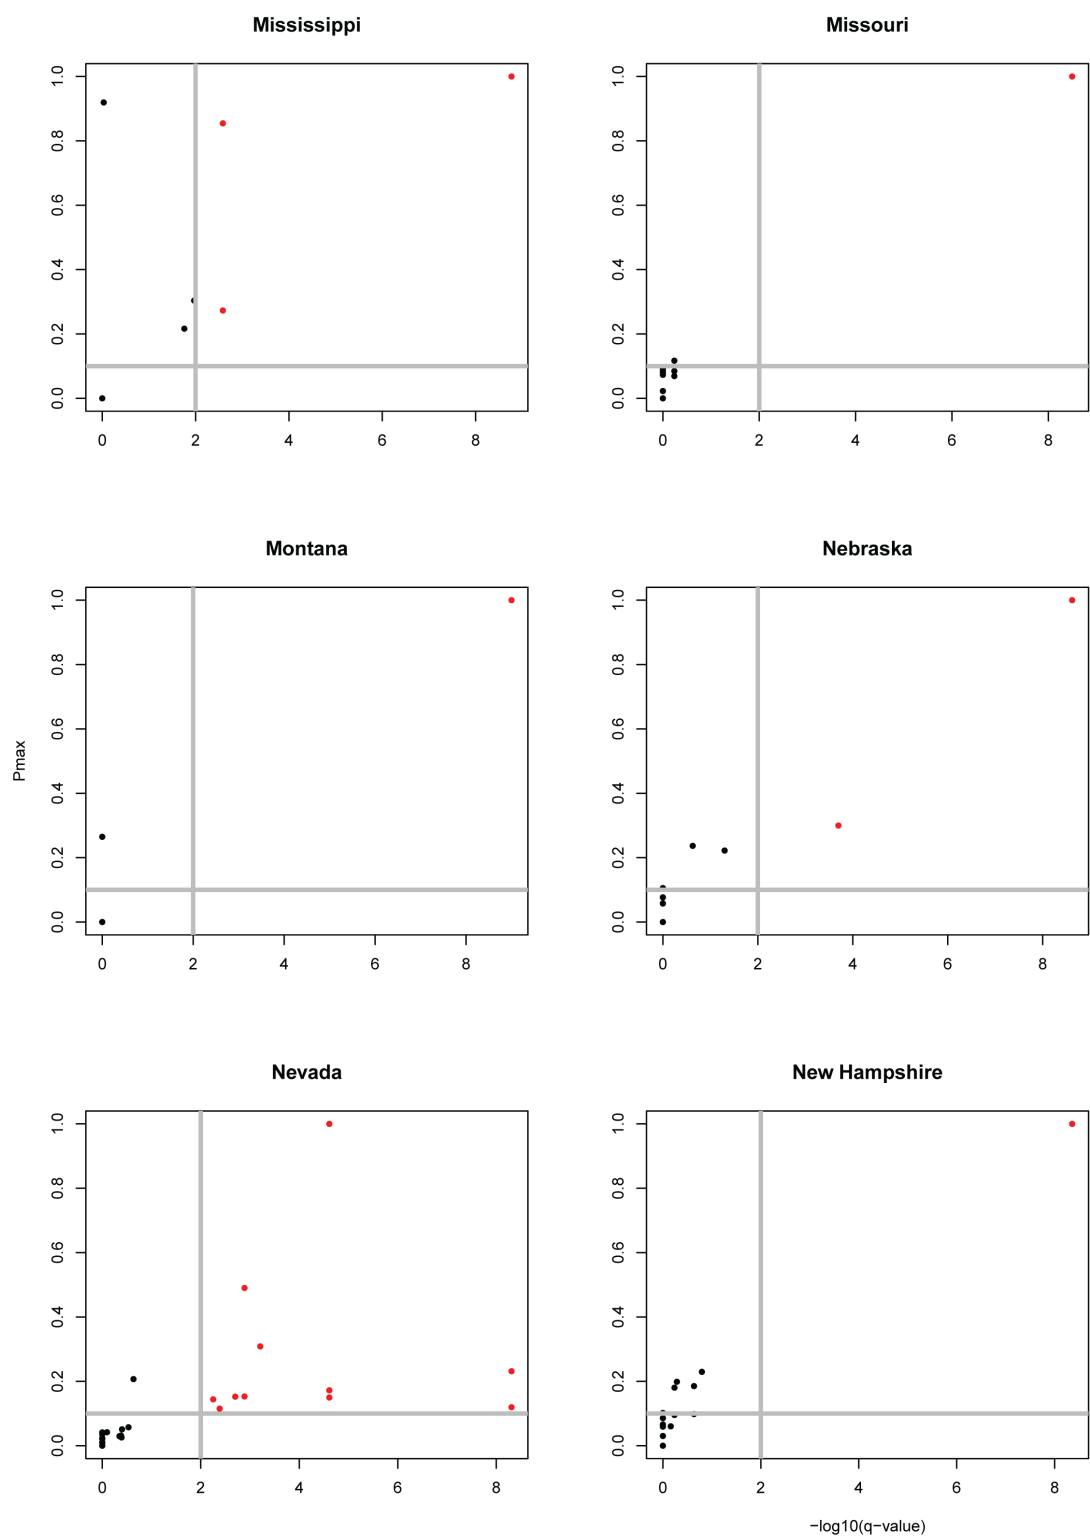

Figure S1 (continued).

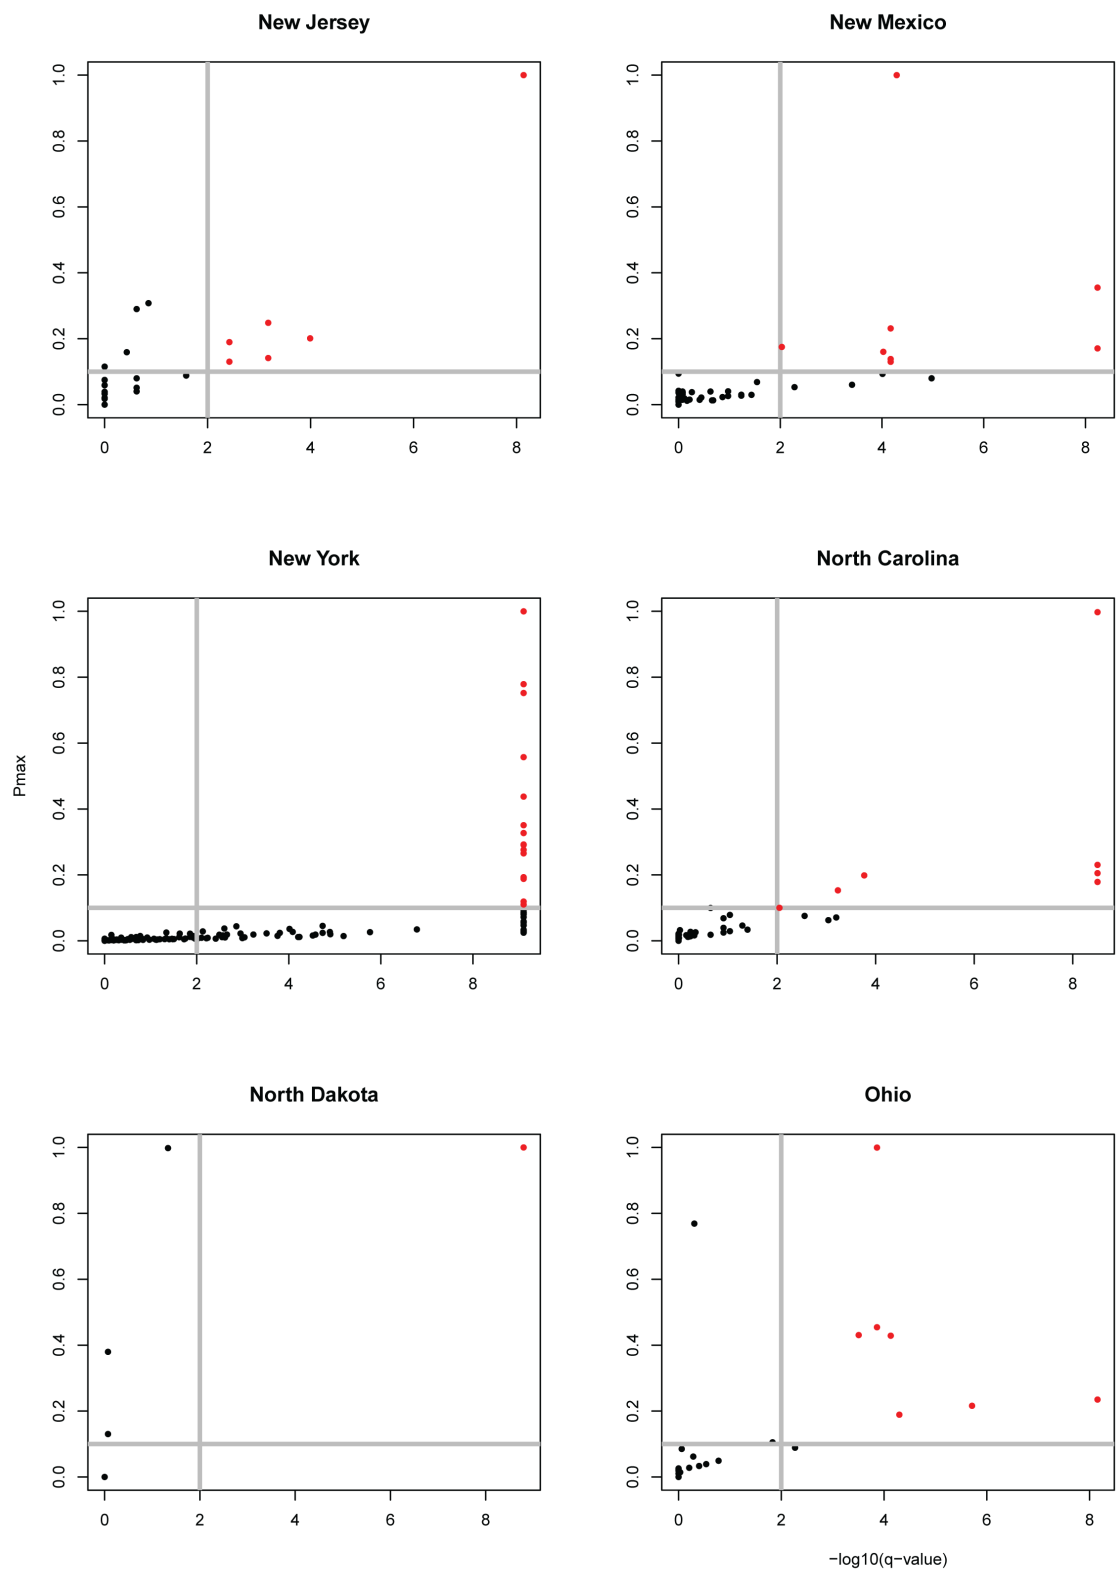

Figure S1 (continued).

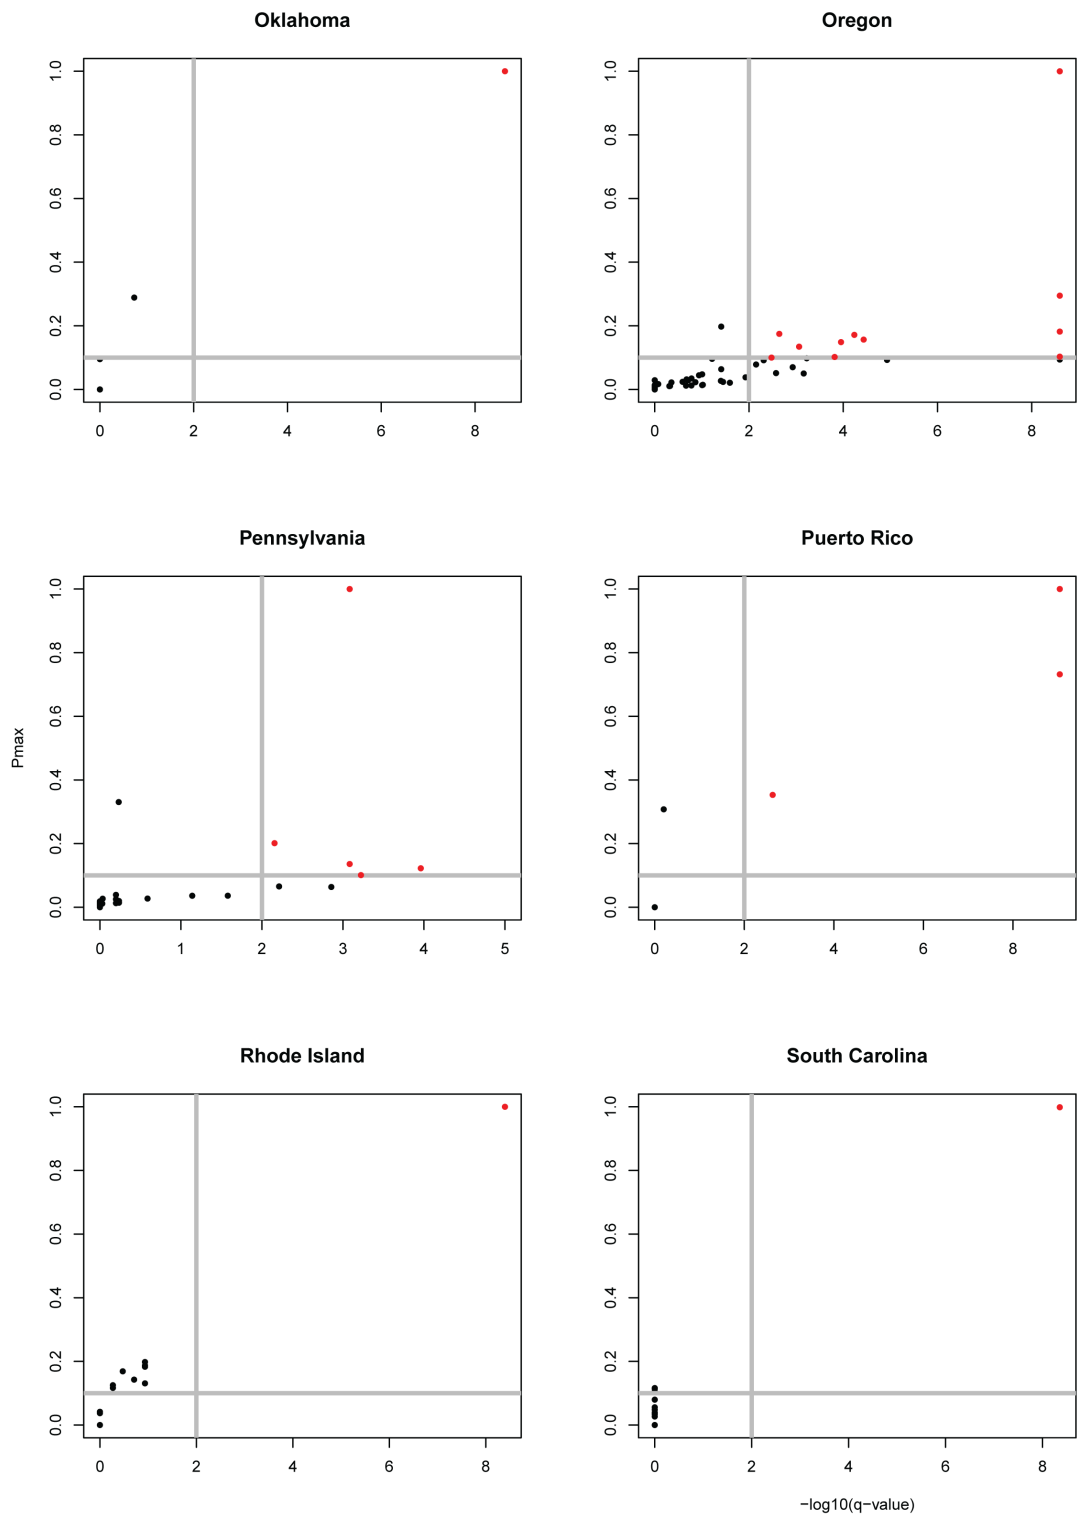

Figure S1 (continued).

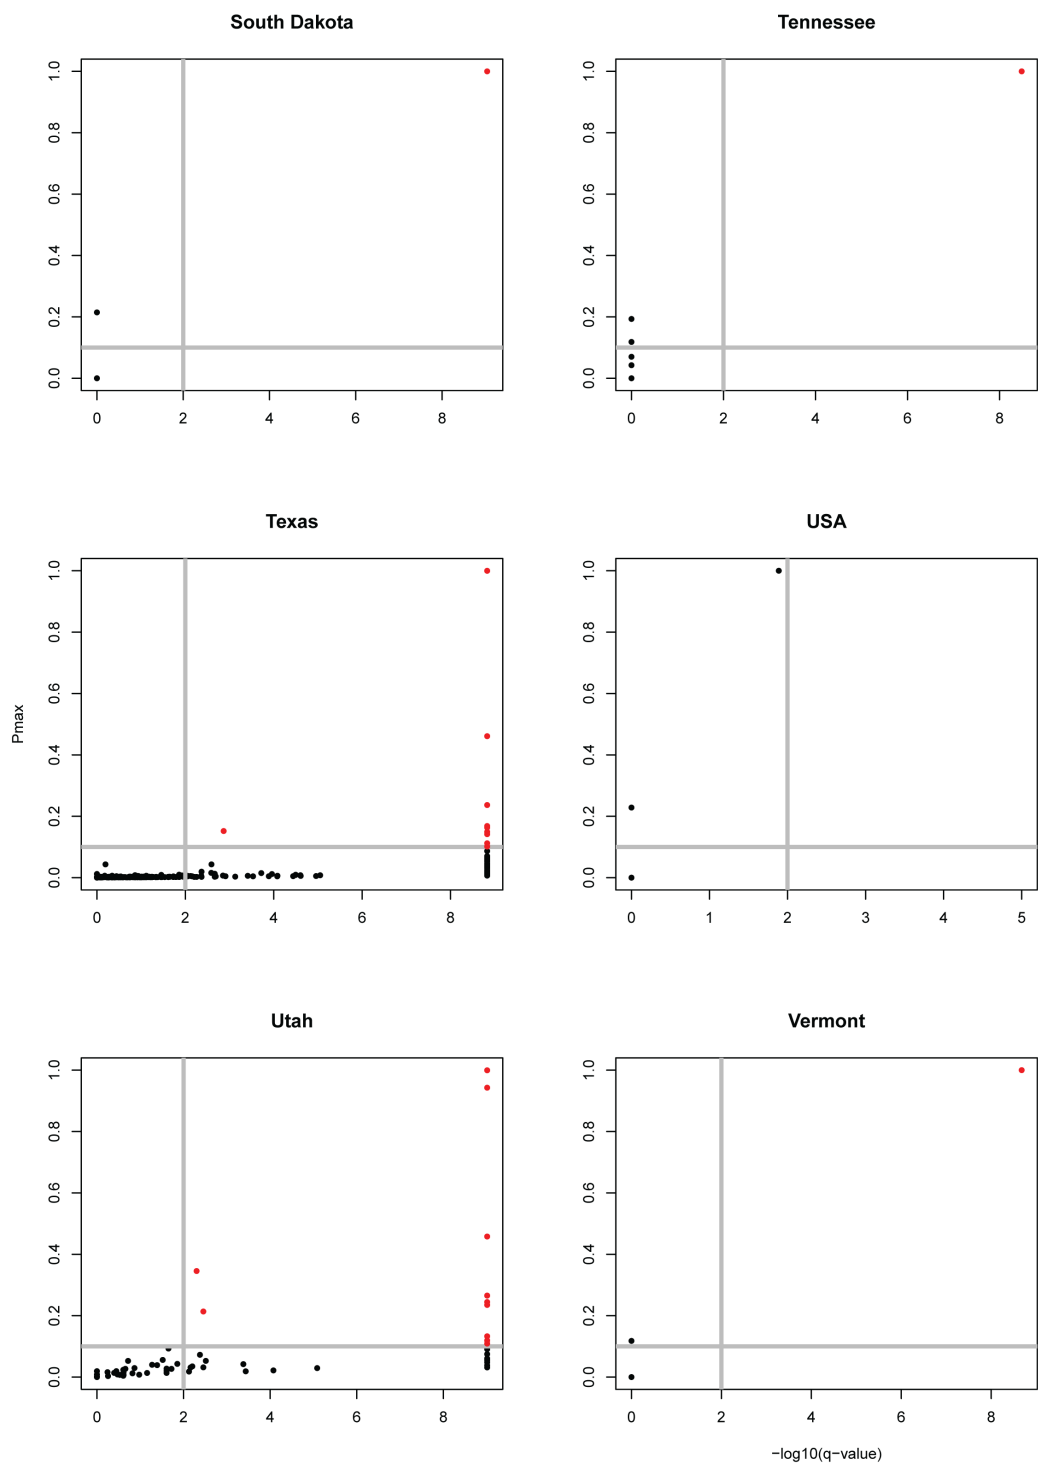

Figure S1 (continued).

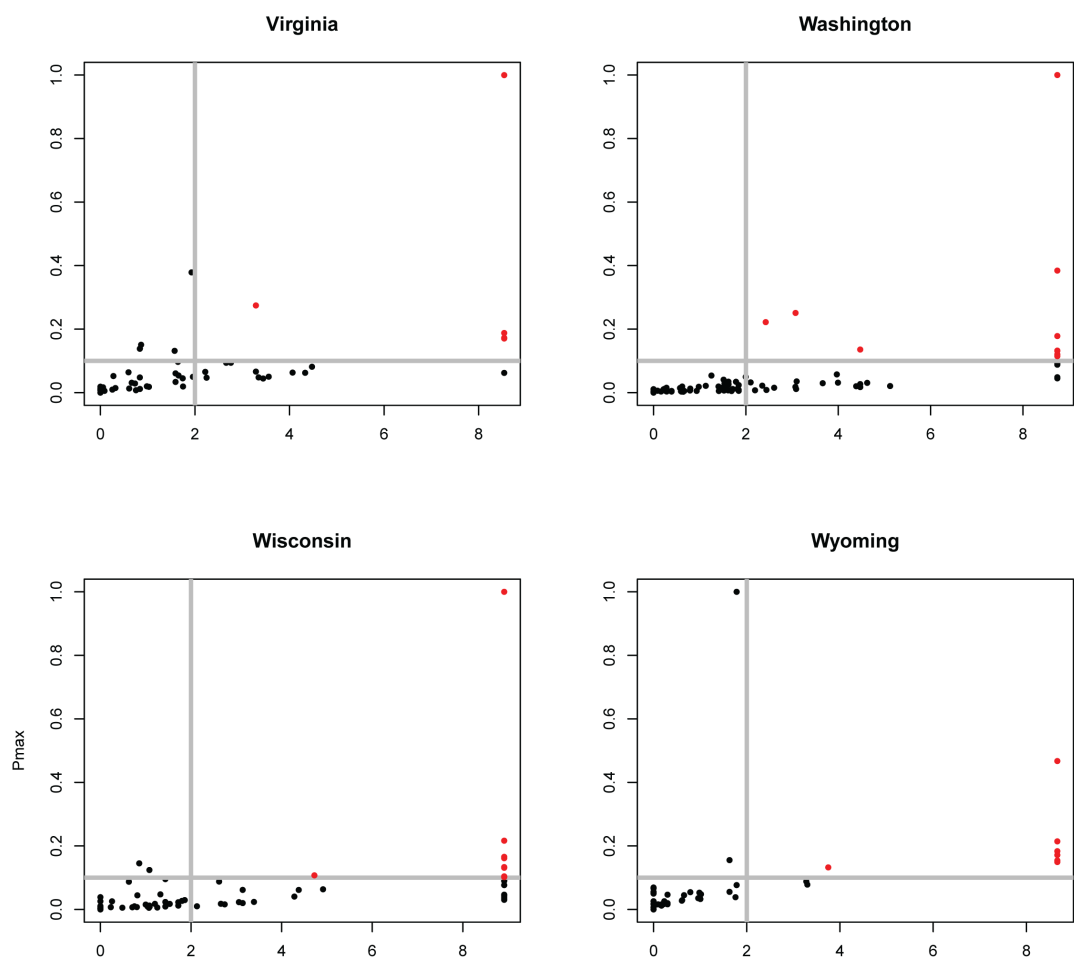

Figure S2. Temporal patterns of VRVs identified in each state/territory.

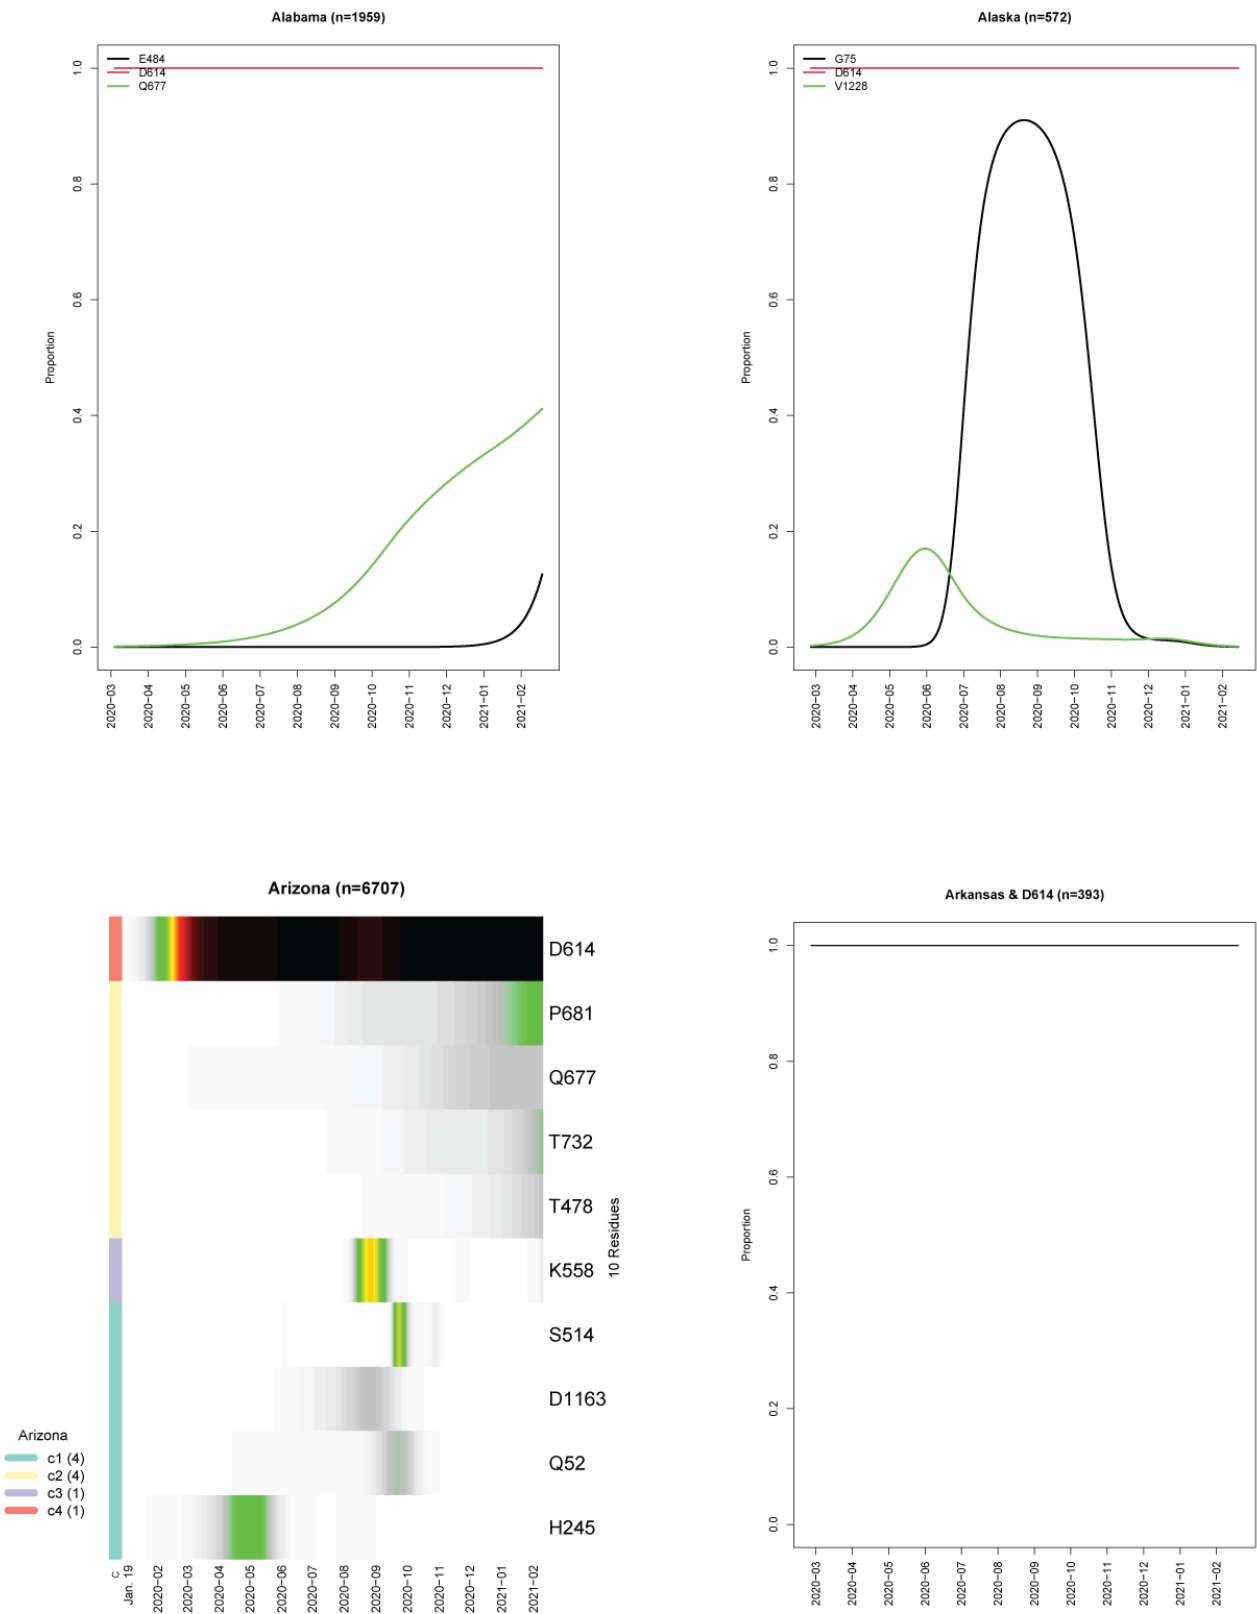

Figure S2 (continued).

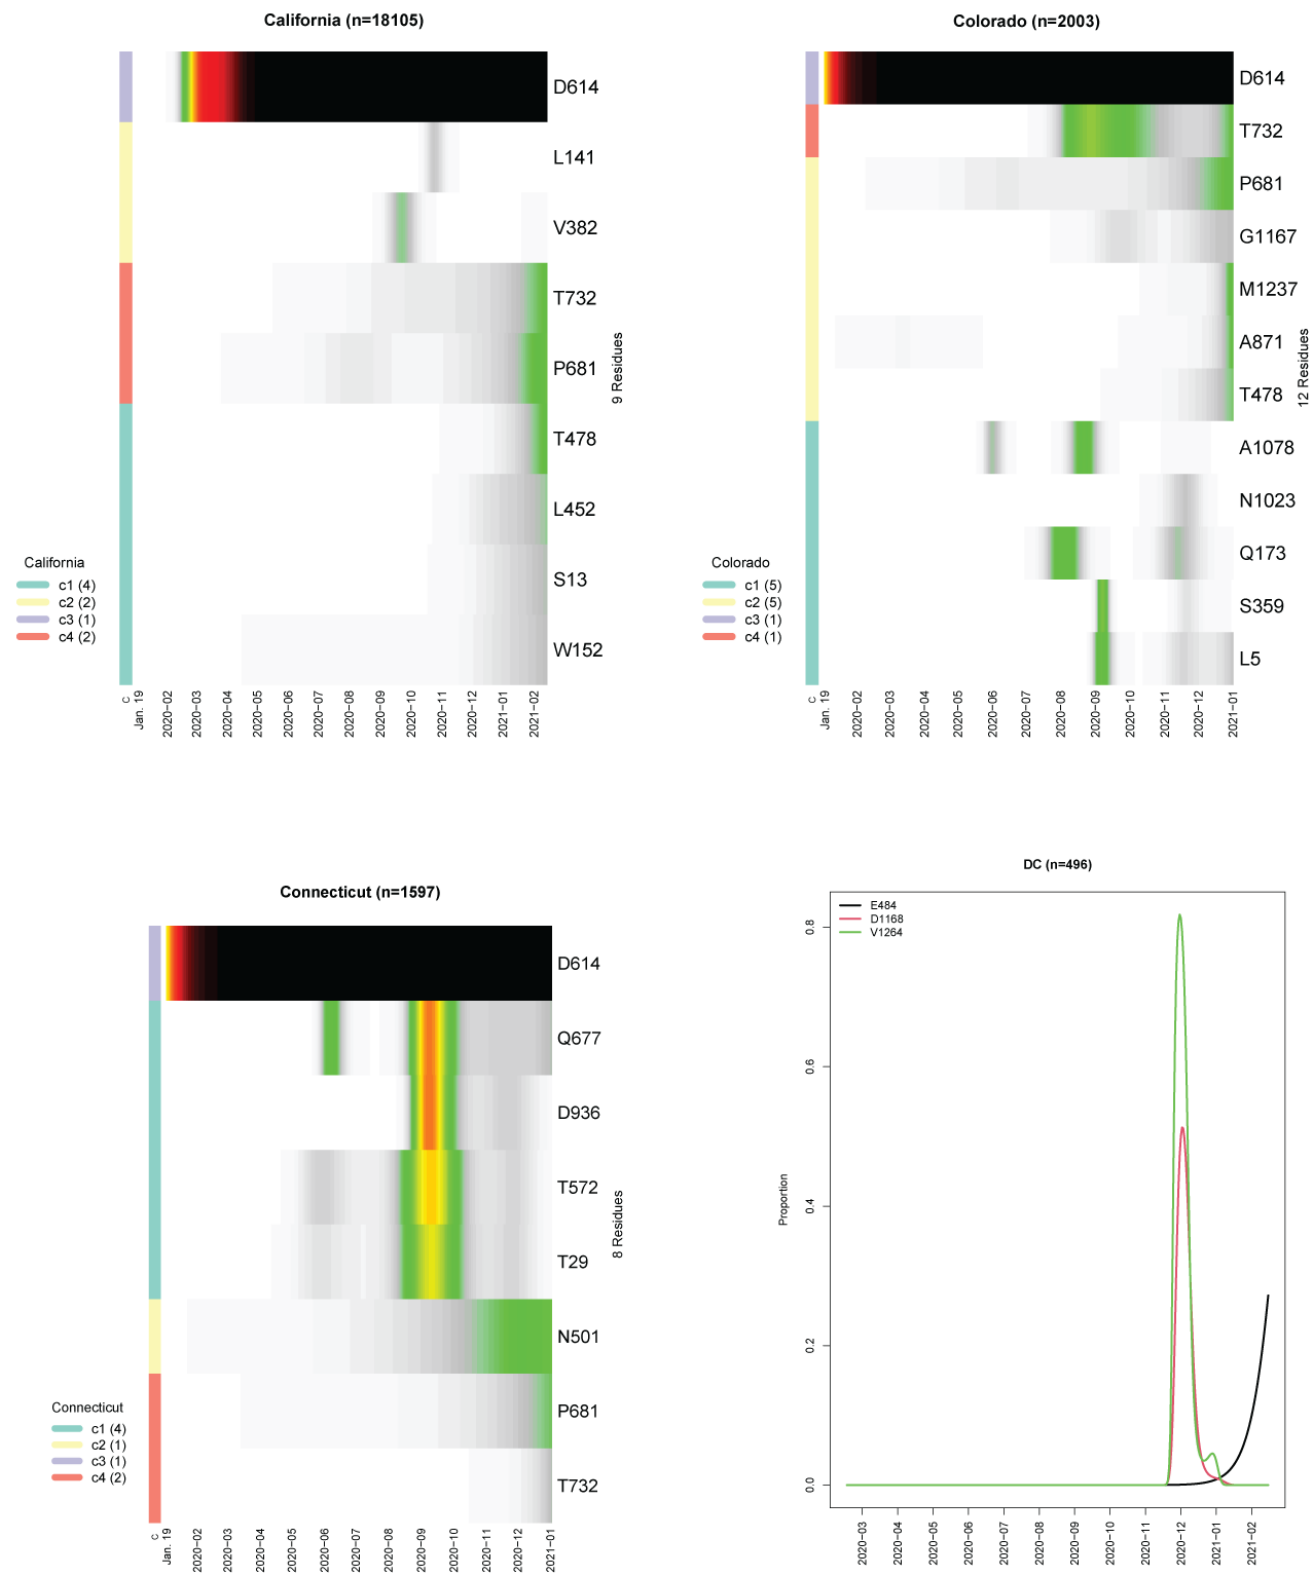



Figure S2 (continued).

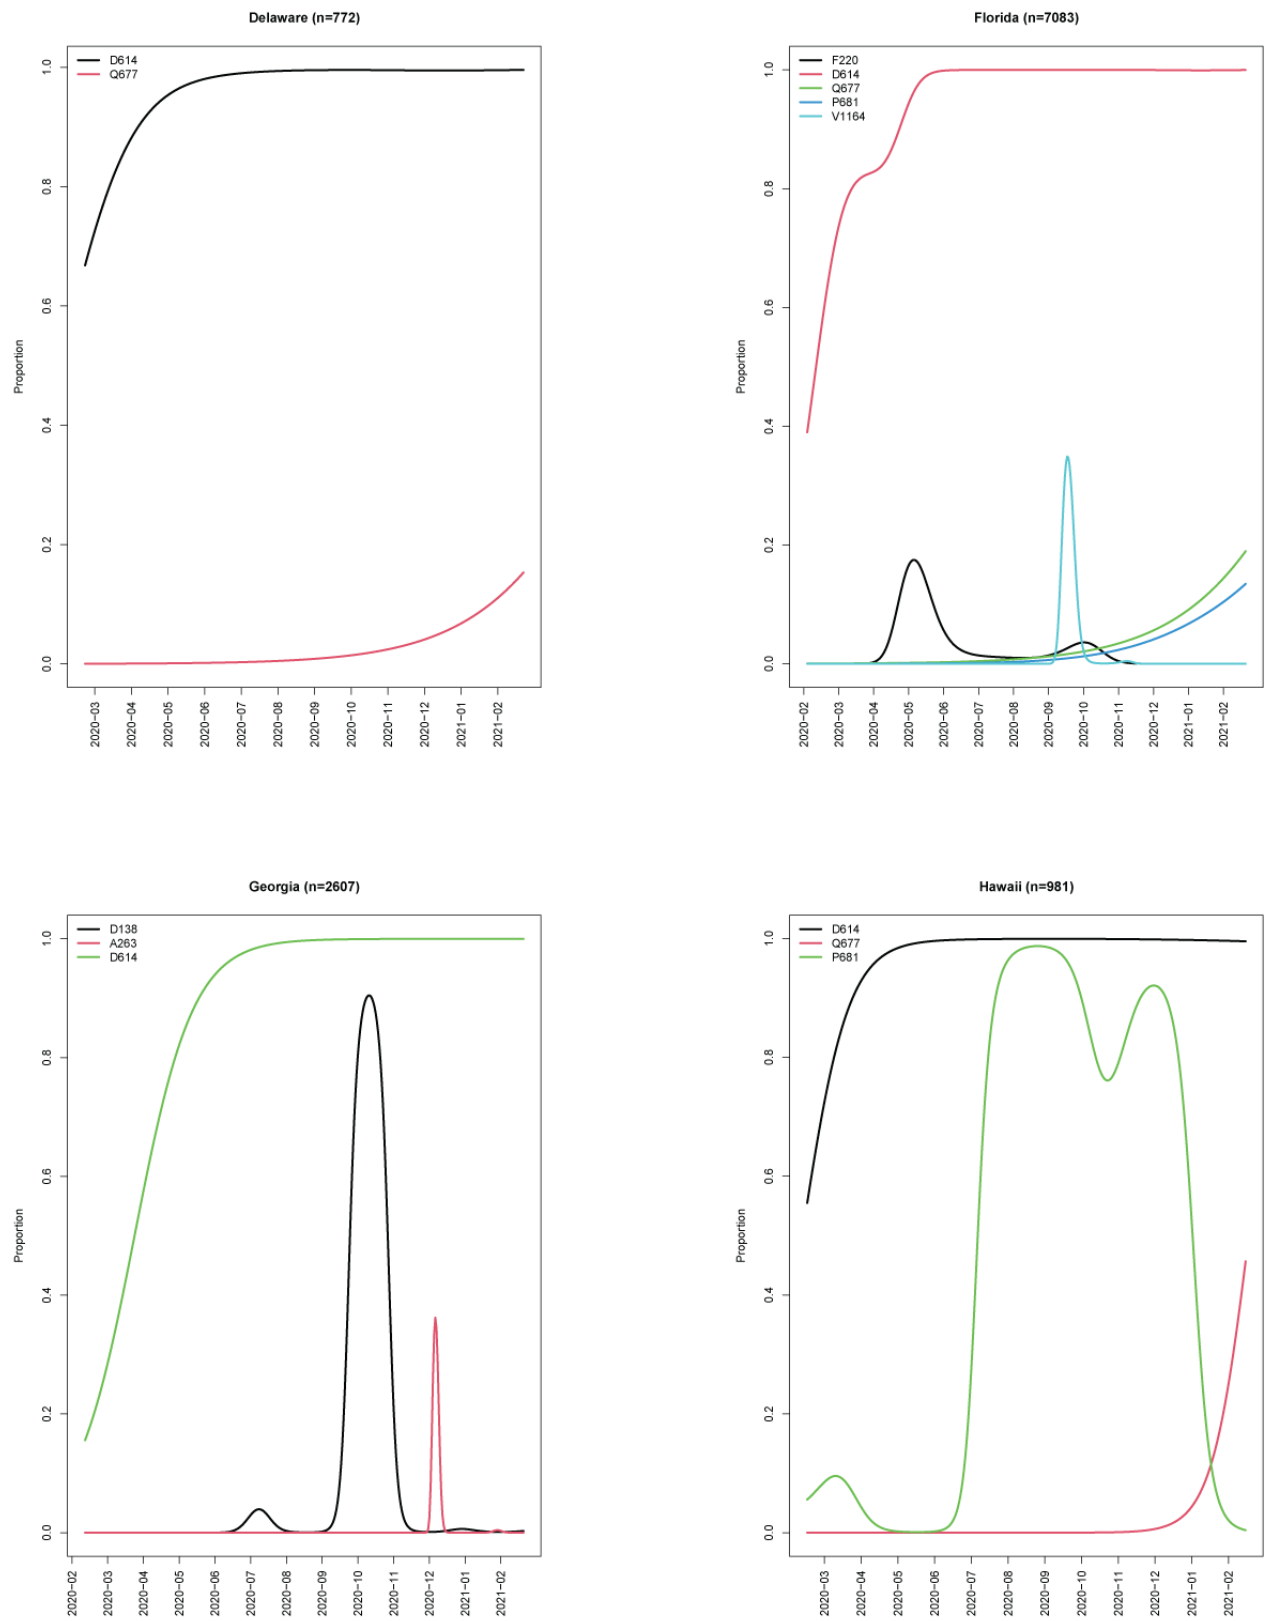

Figure S2 (continued).

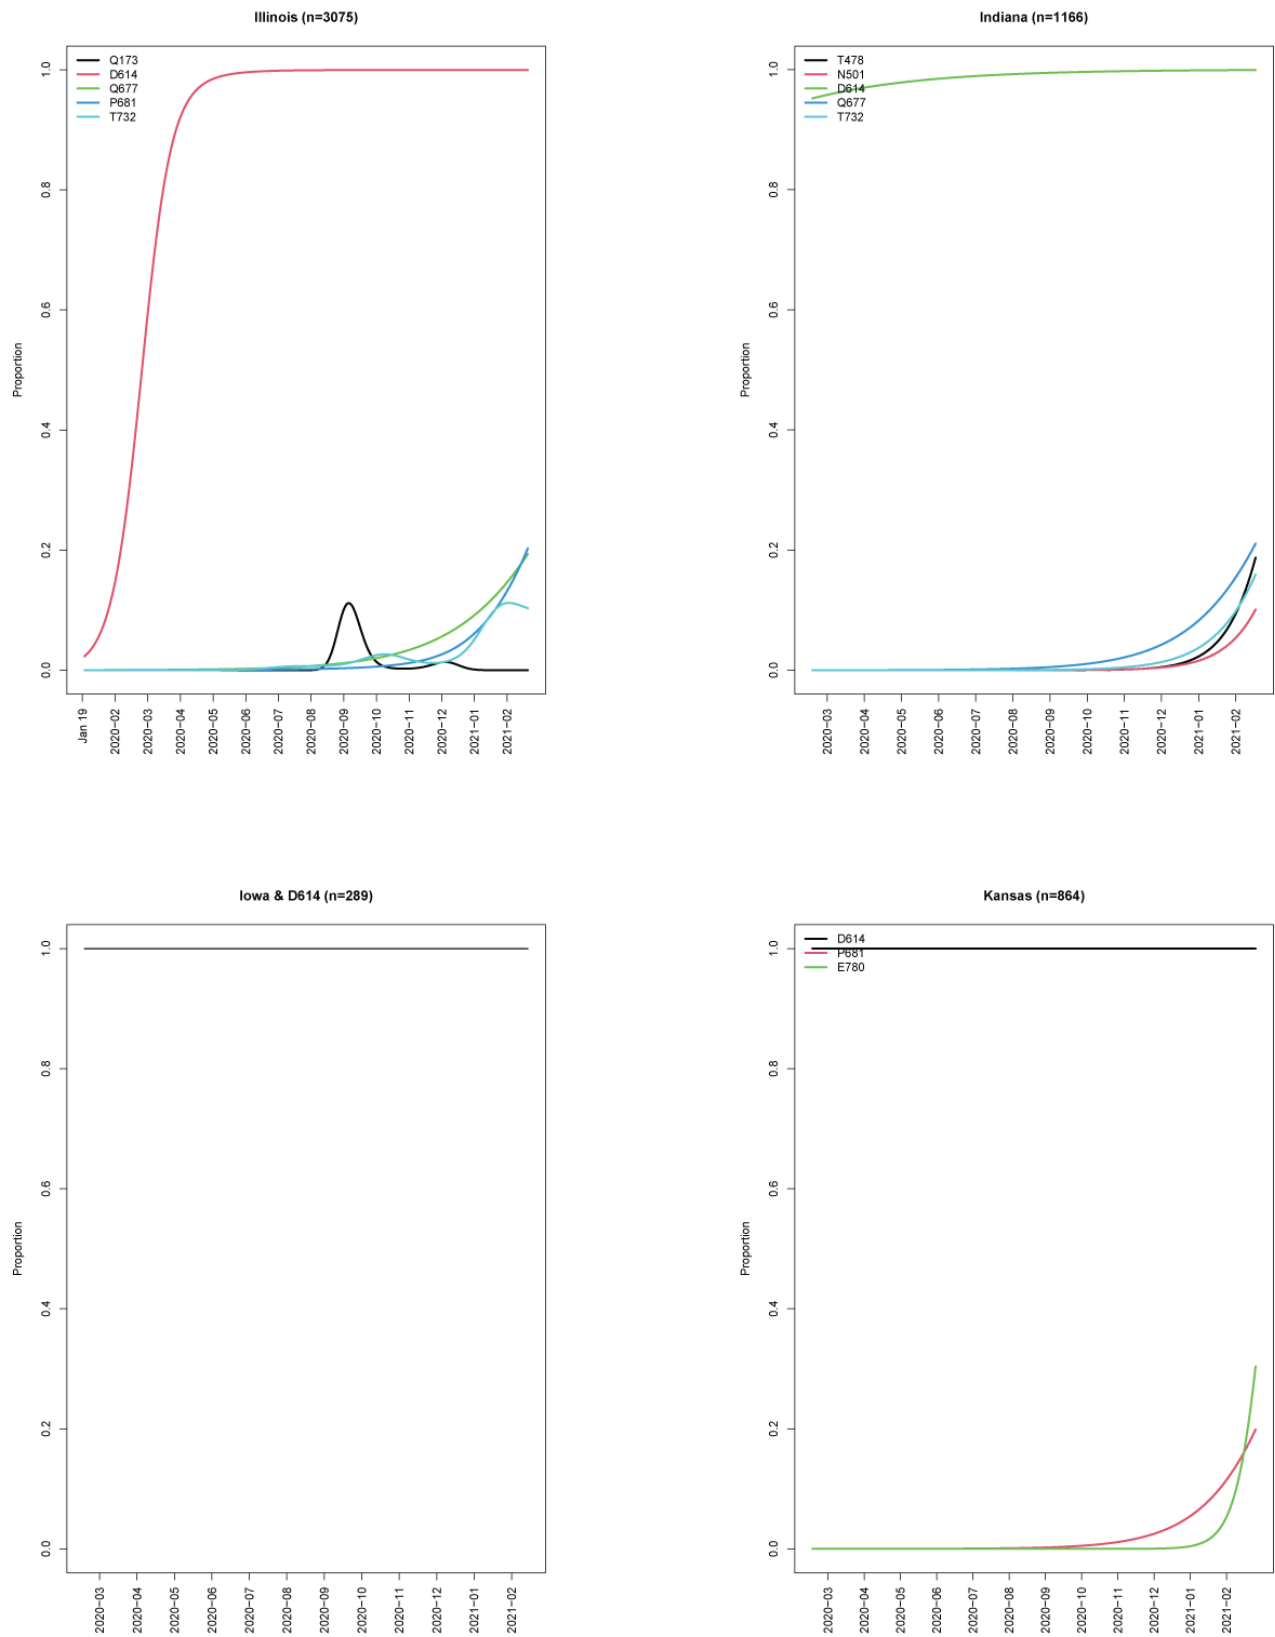

Figure S2 (continued).

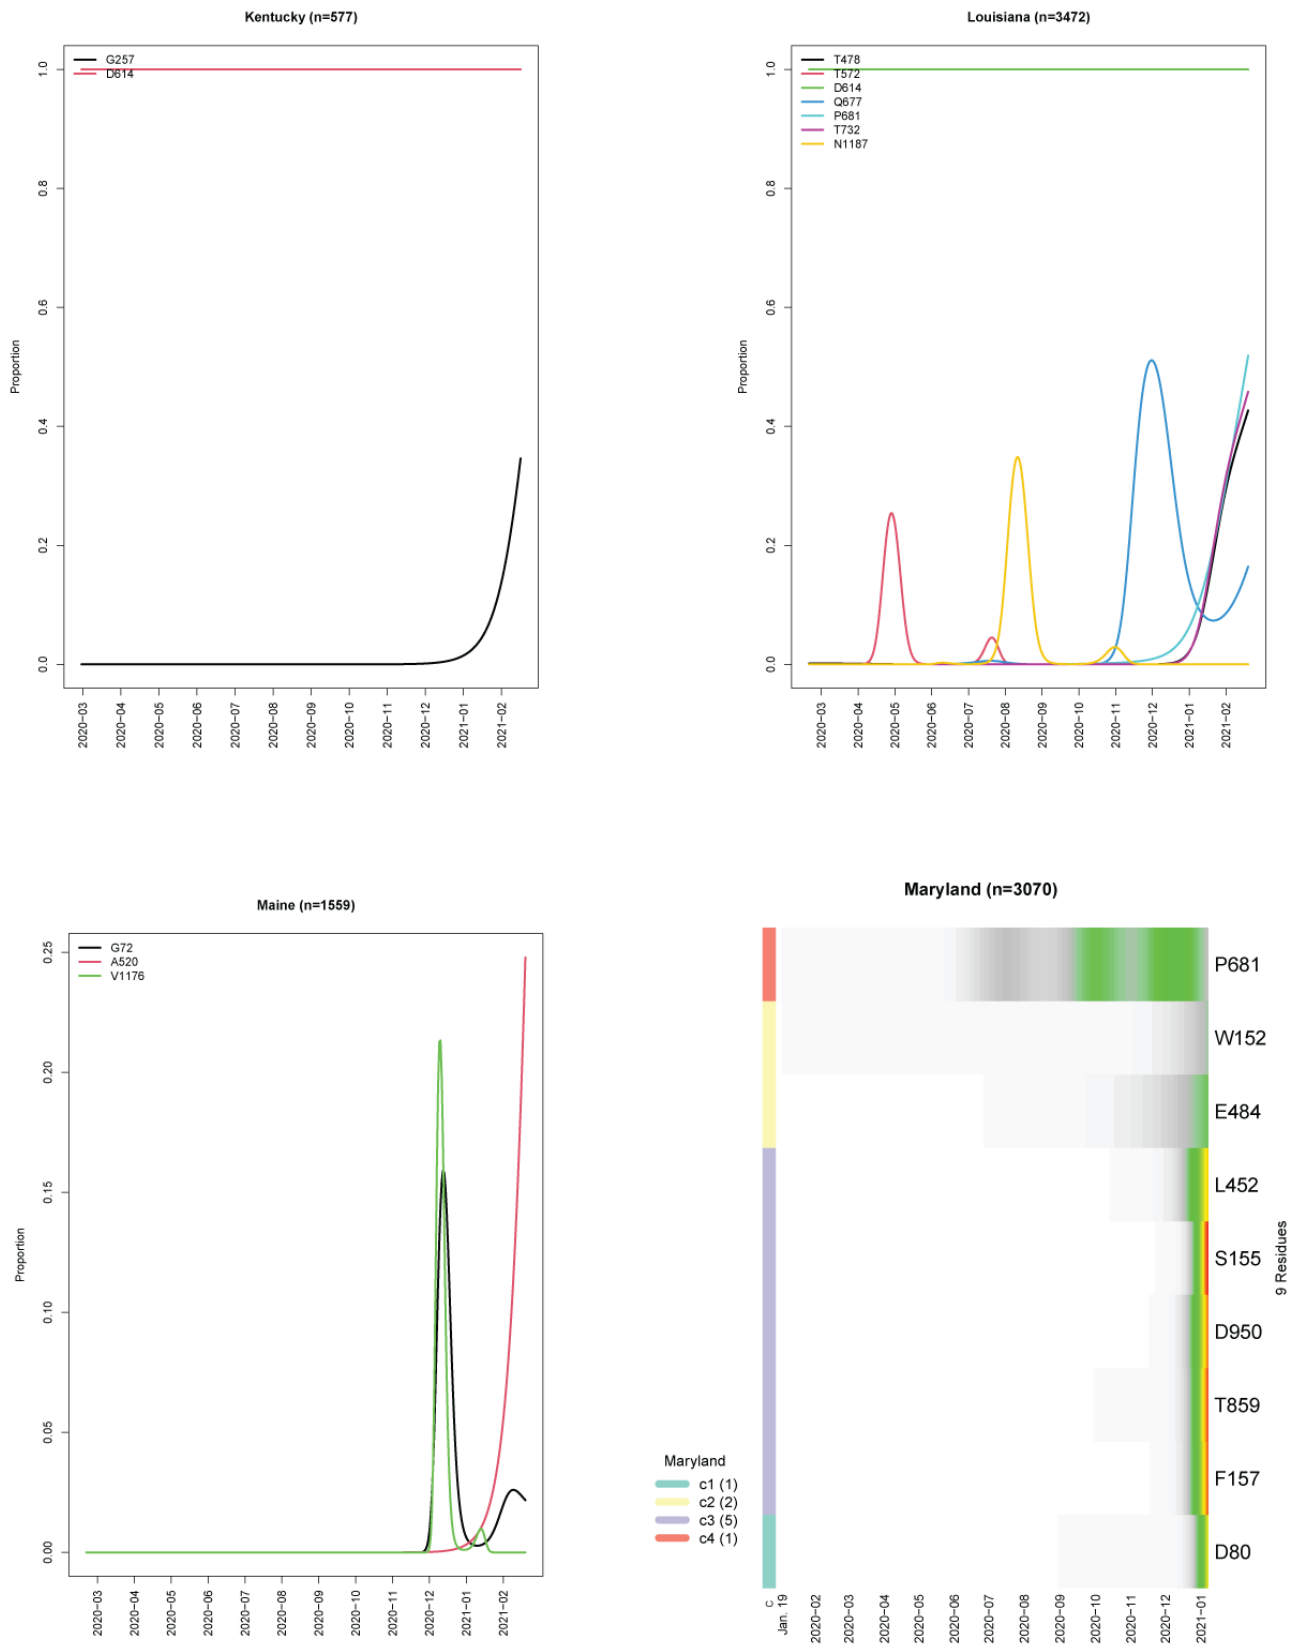

Figure S2 (continued).

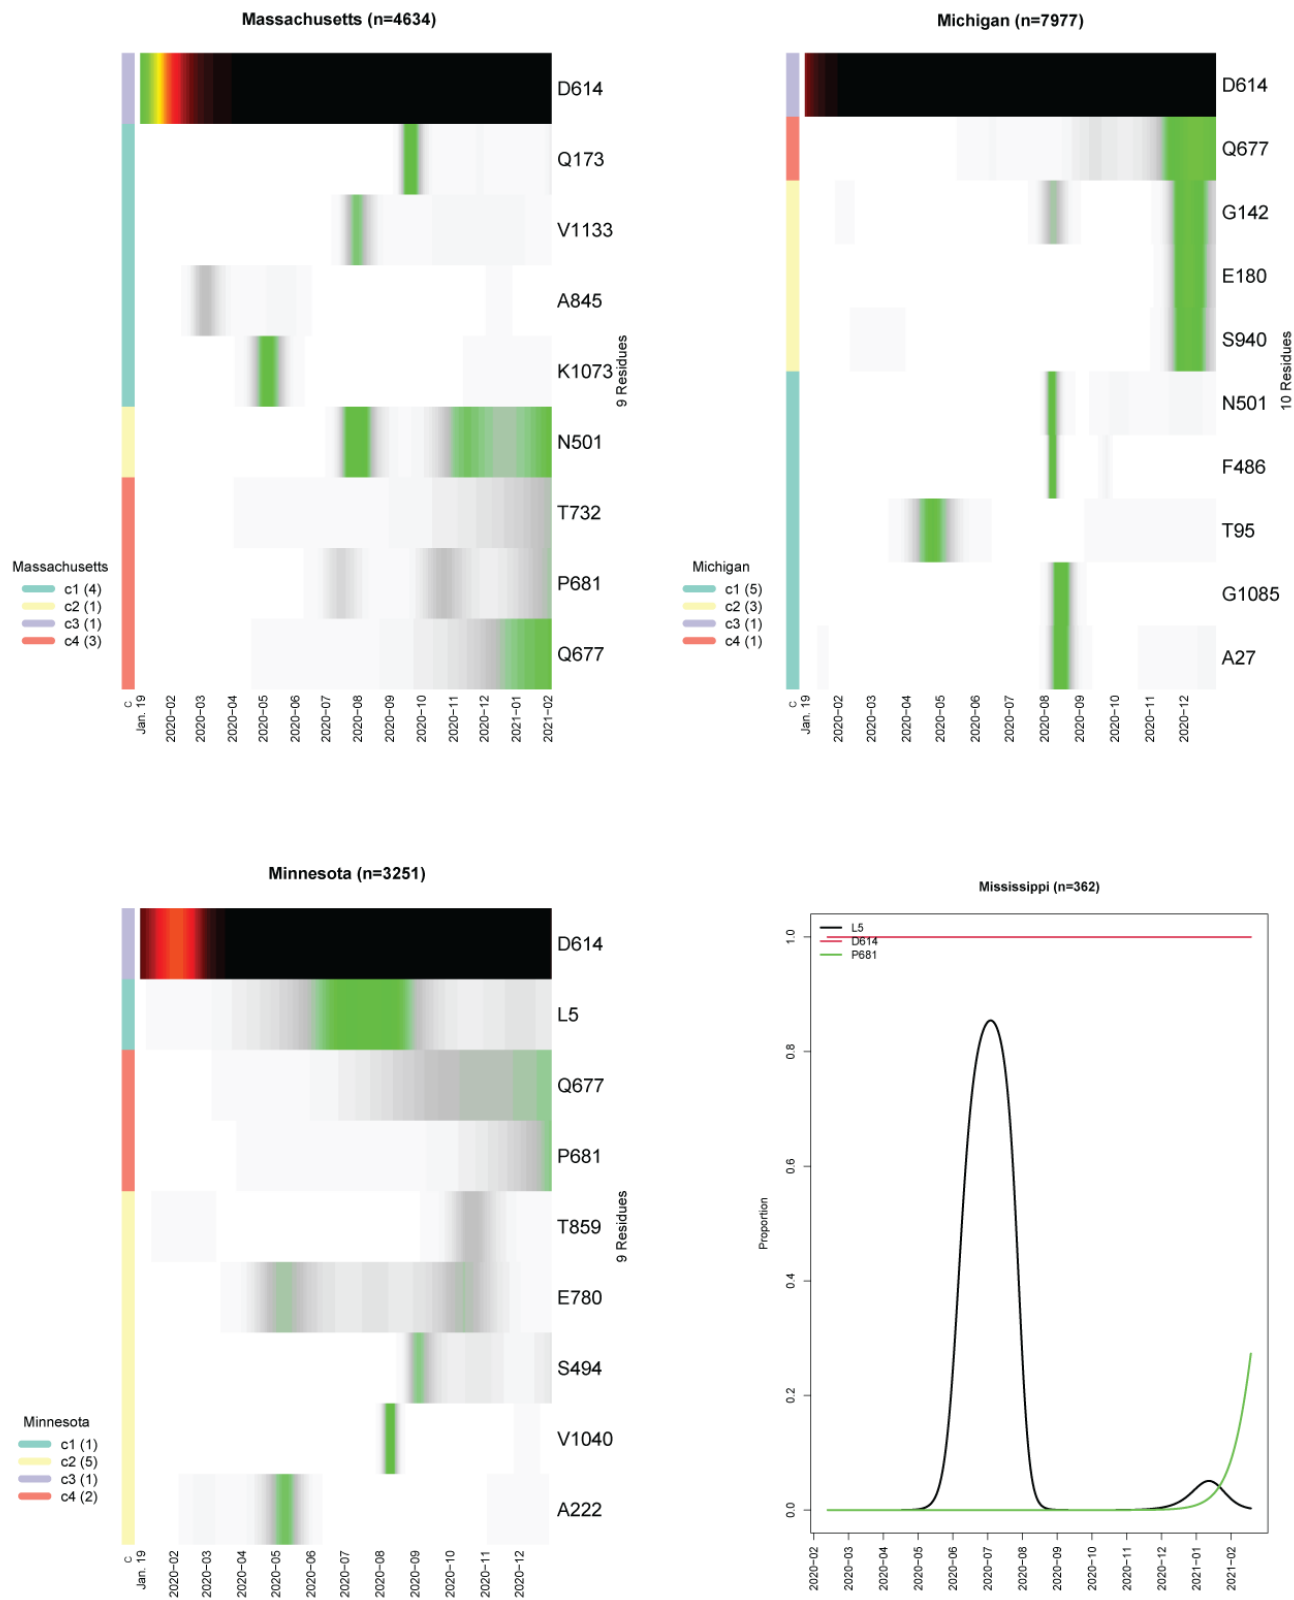

Figure S2 (continued).

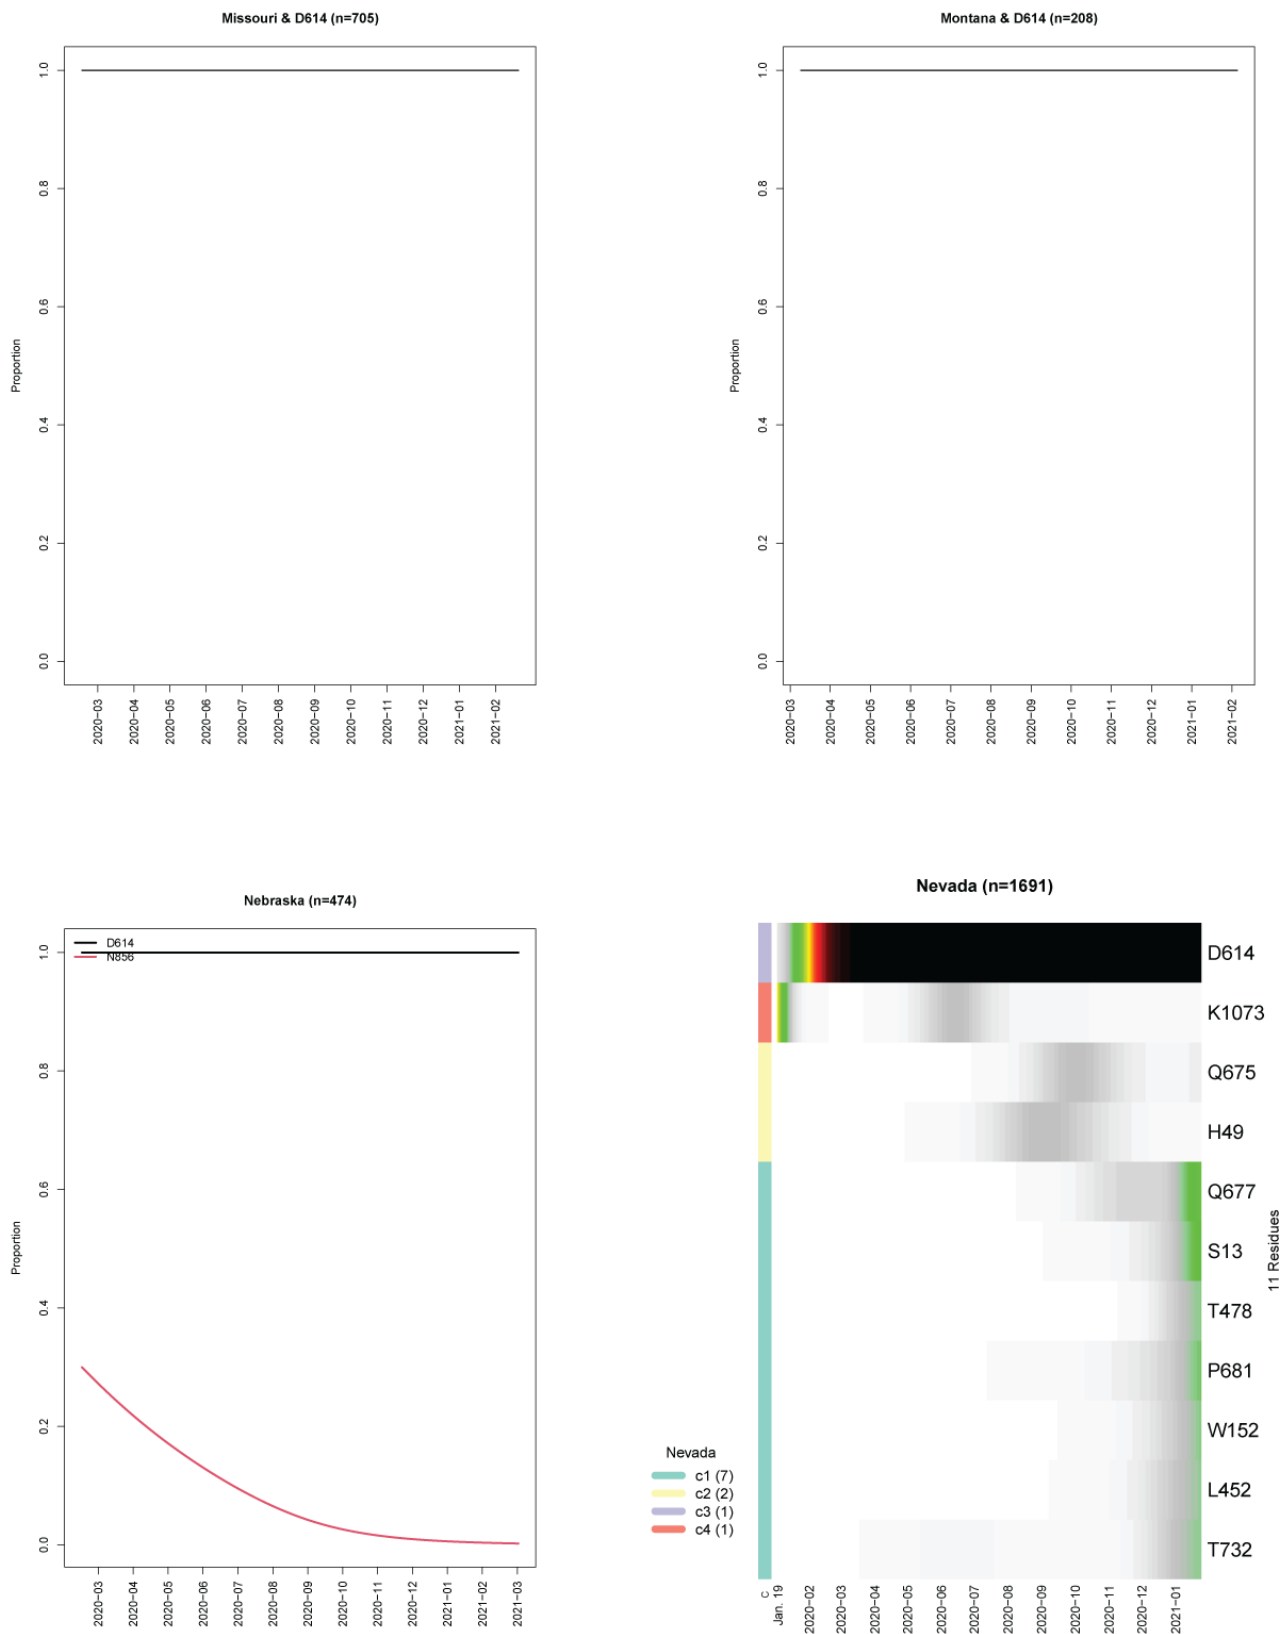

Figure S2 (continued).

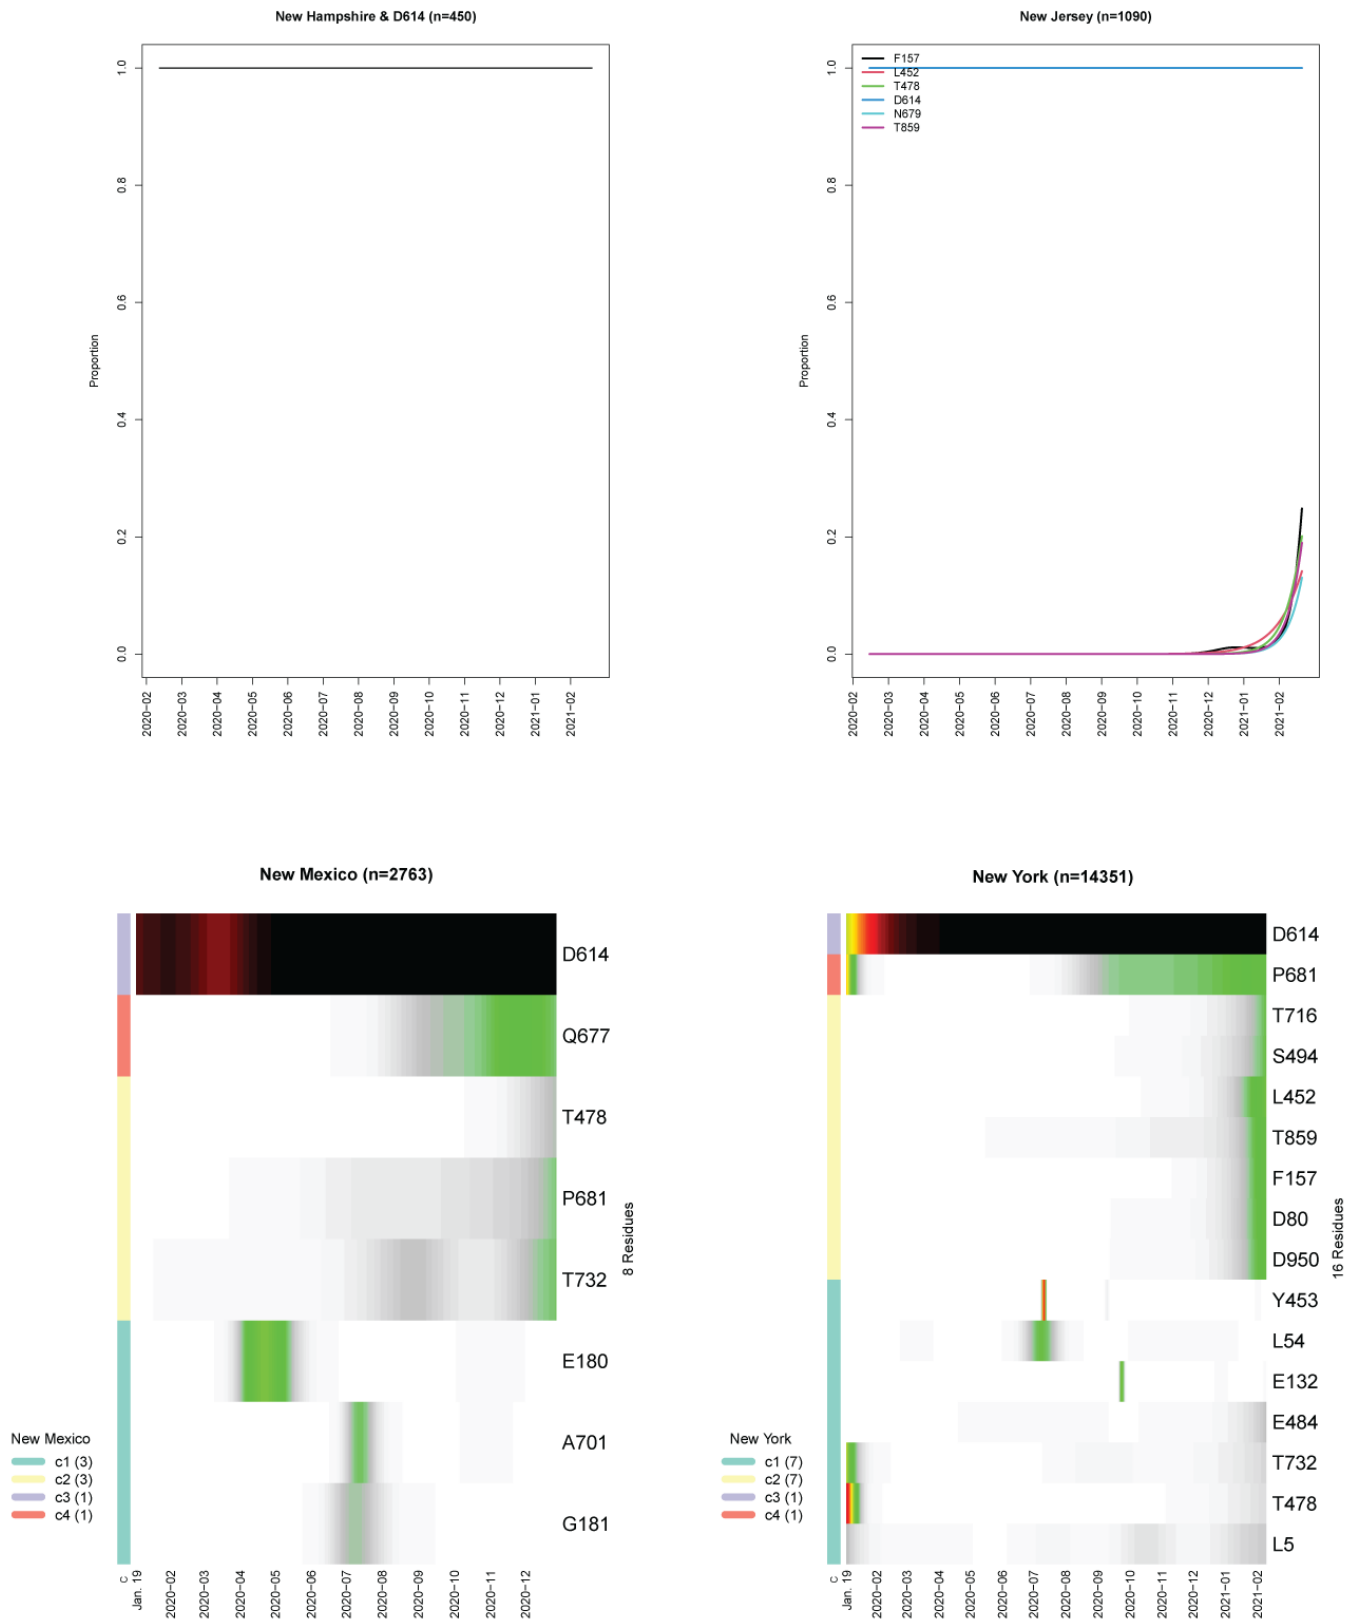

Figure S2 (continued).

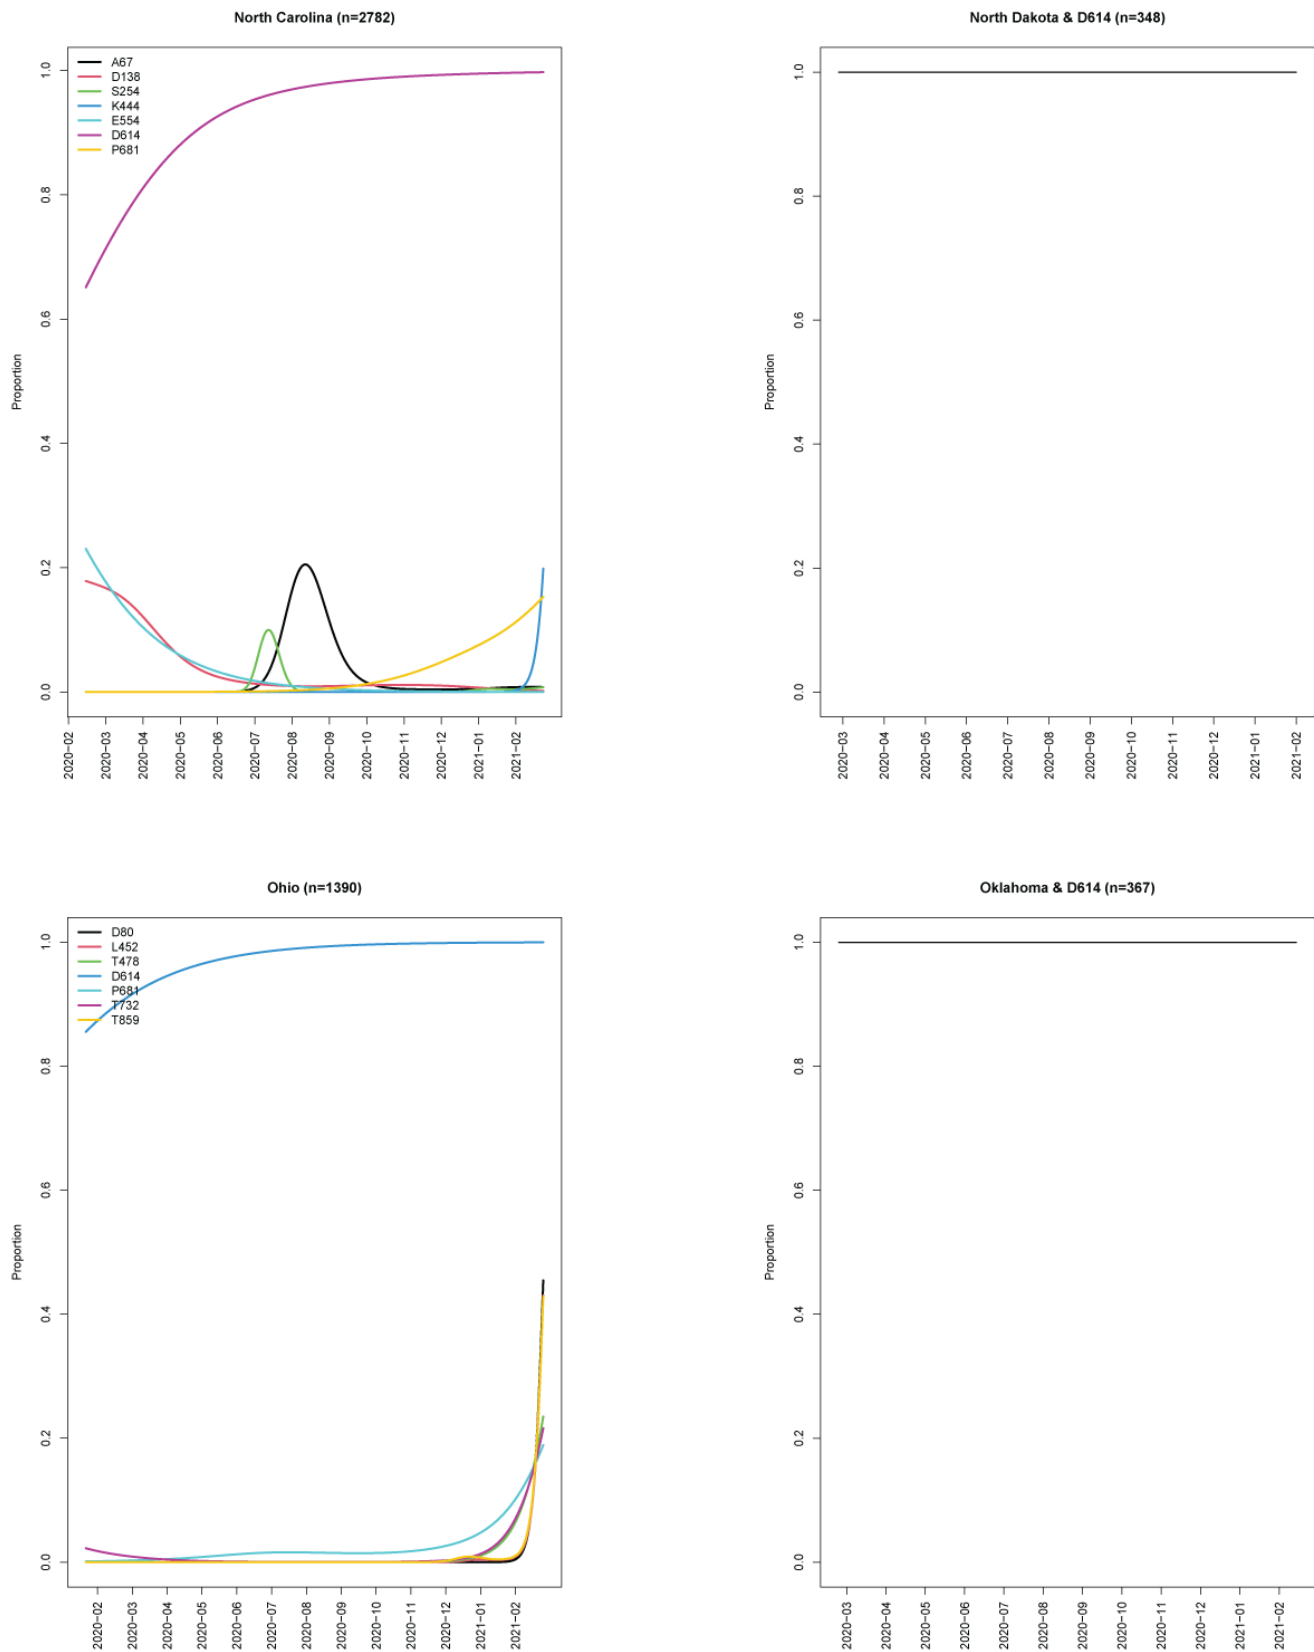

Figure S2 (continued).

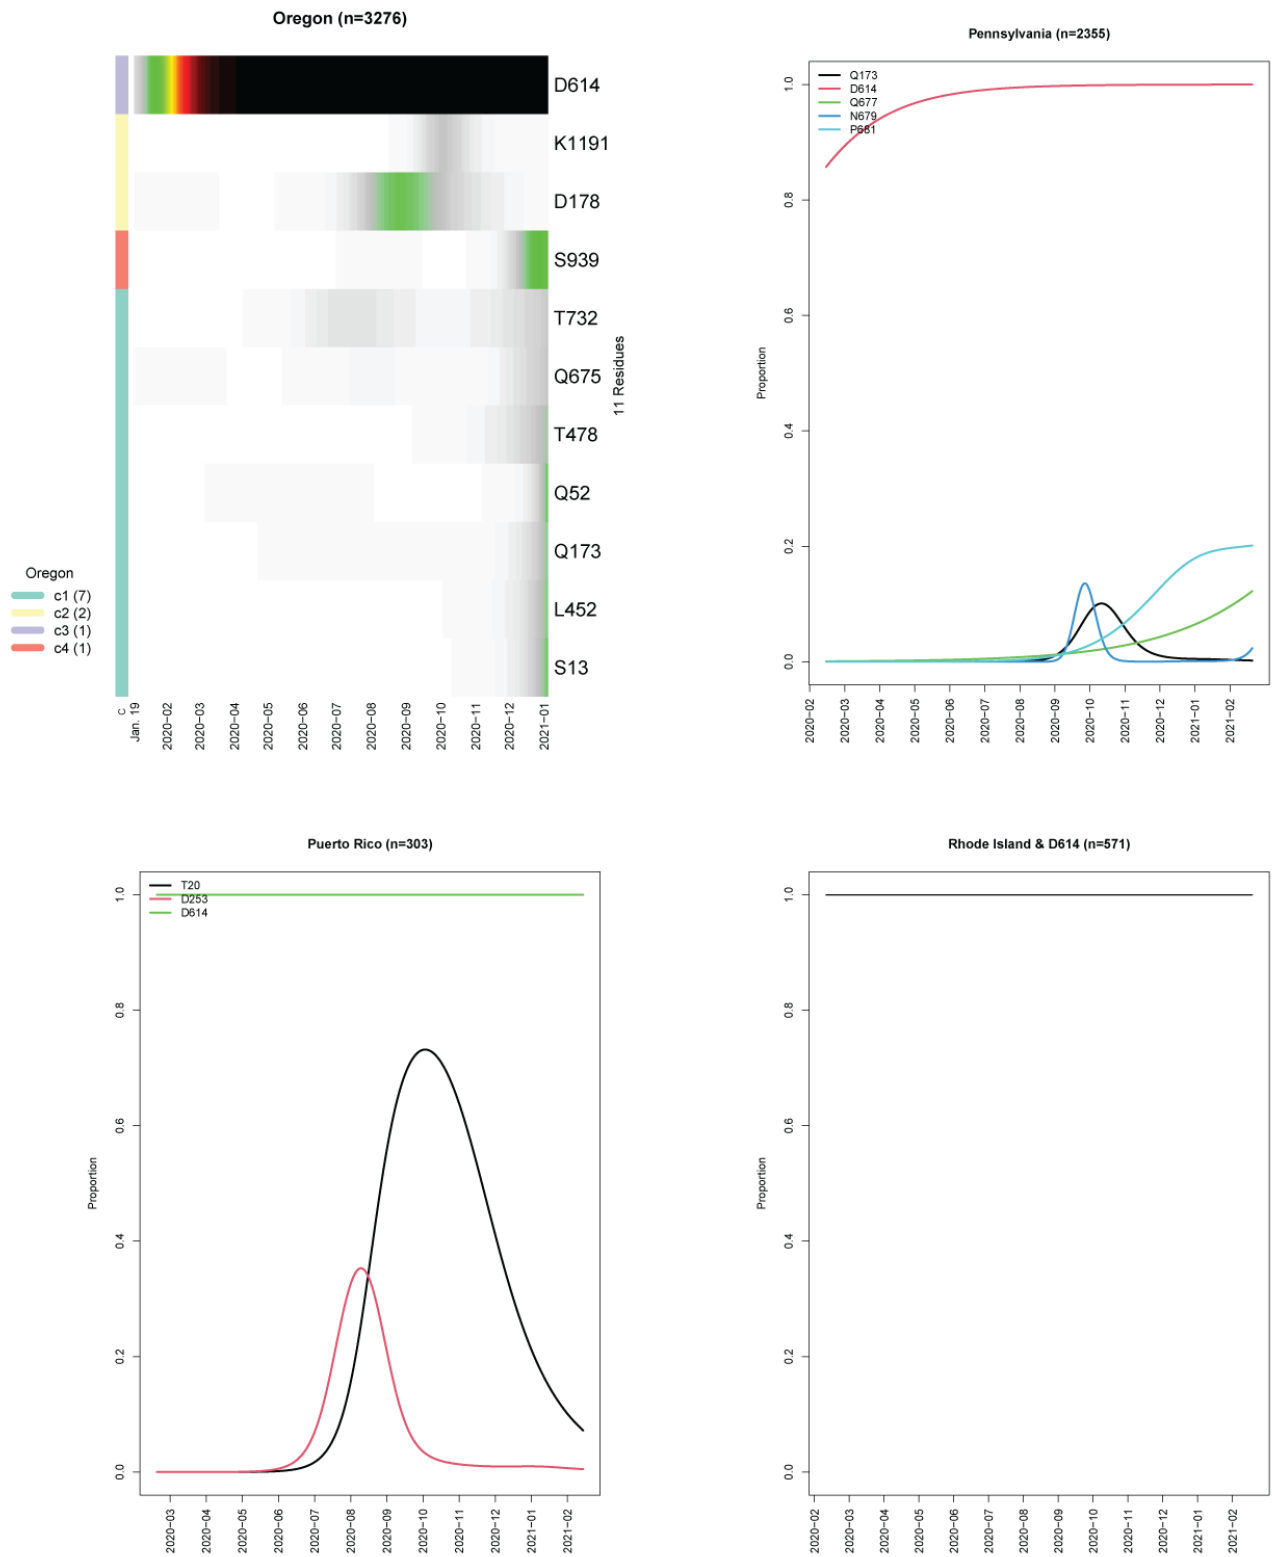



Figure S2 (continued).

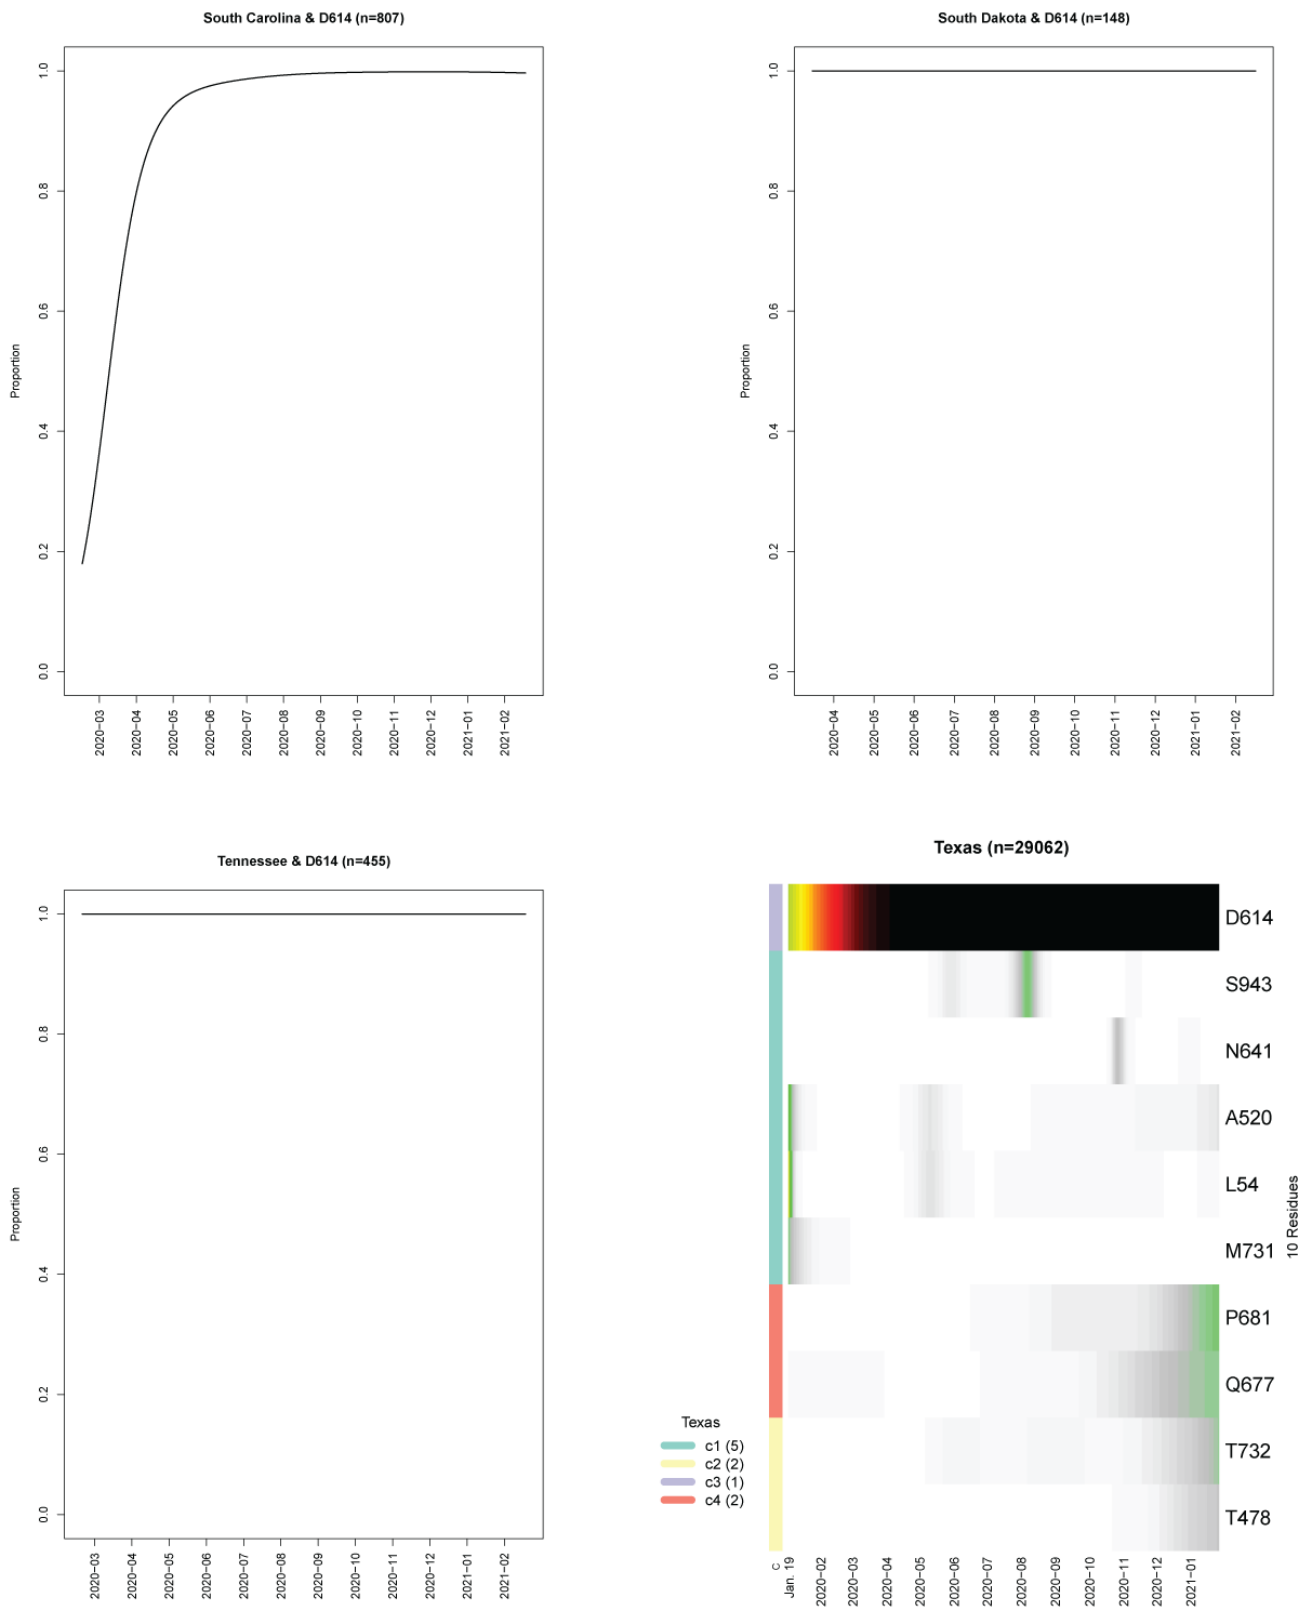

Figure S2 (continued).

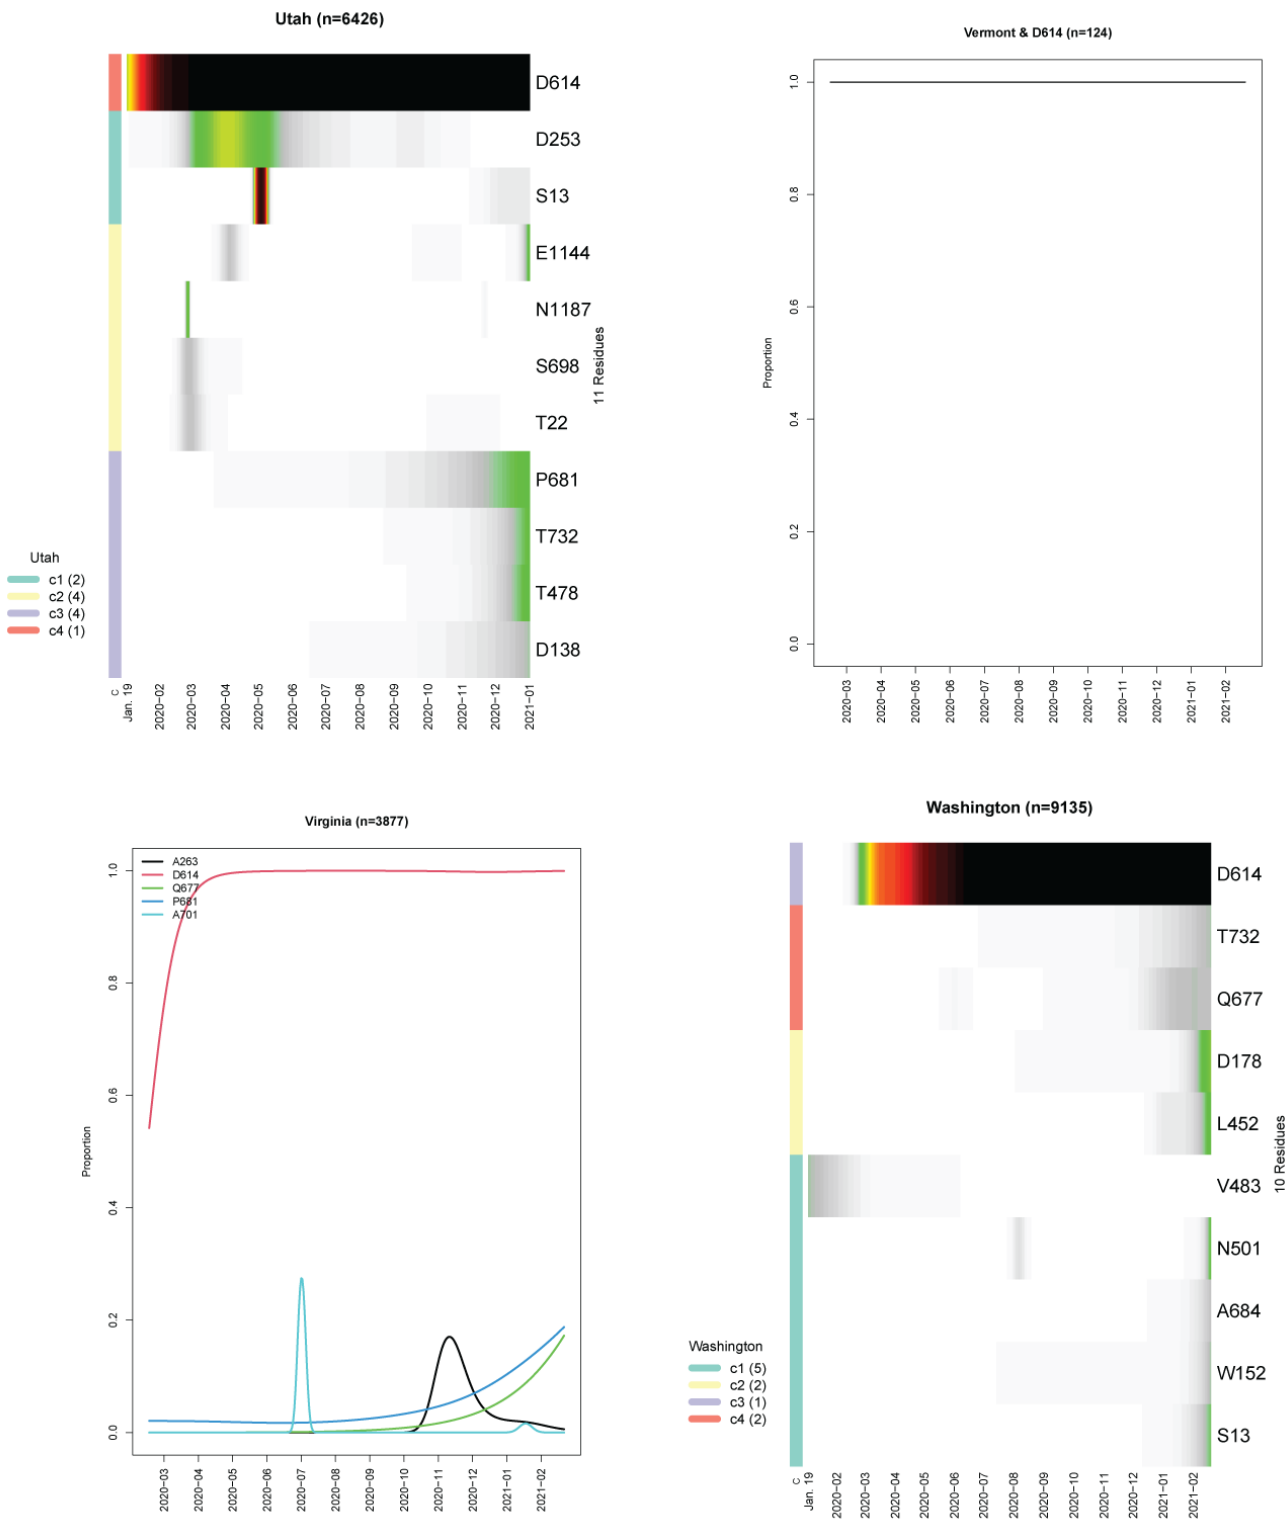

Figure S2 (continued).

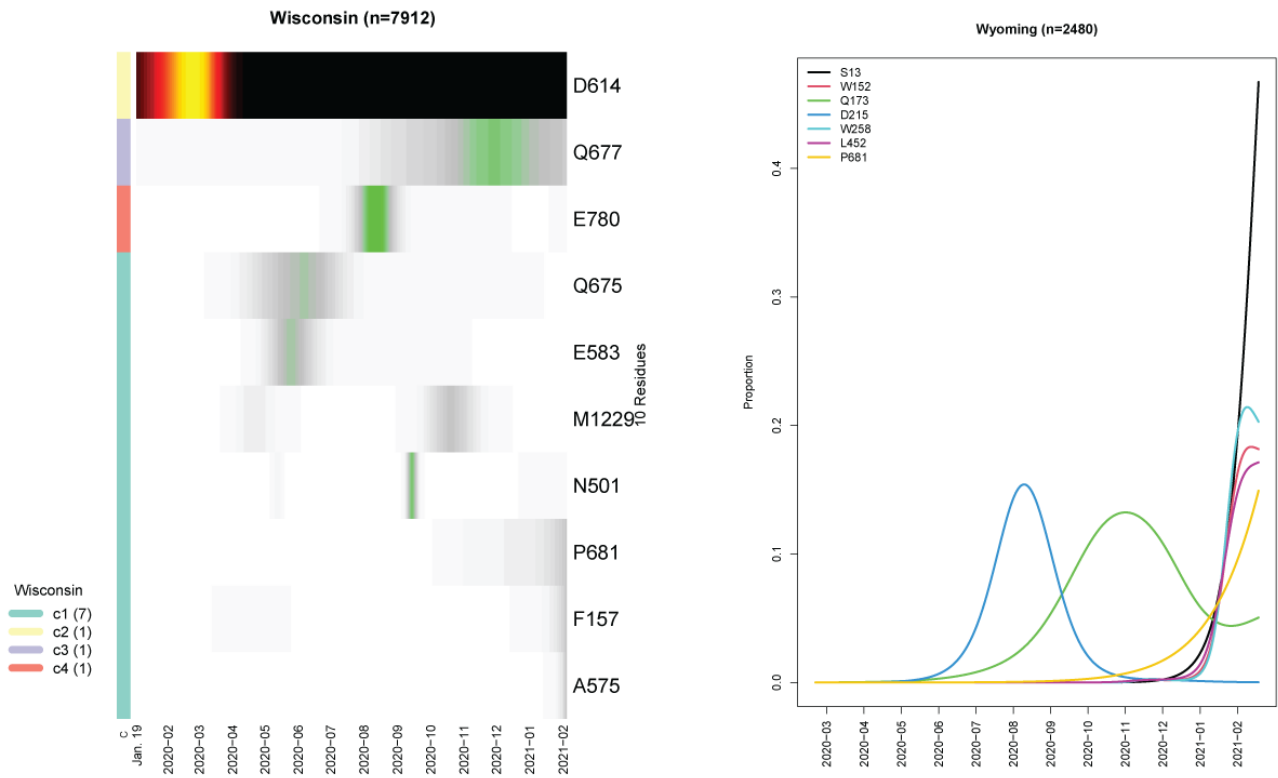

**Figure S3. Locally averaged proportions over time for substitutions at 3 AA-subs in a VOI (Y144, F888, V1176) and at 3 AA-subs in a VOC (H69, Y144, K417) that were not detected by the SLS method in states/territories where at least three sequences had a substitution at the designated AA position.**

AA-sub, amino acid that has been shown to harbor a substitution in a US-circulating VOI or VOC. VOI, variant of interest; VOC, variant of concern. The “TP1” through “TP10” labels, along with the vertical color bar on the left side of the plot, refer to the 10 individual State-VRV clusters identified in the plot, based on their temporal patterns (“TP” = temporal pattern).

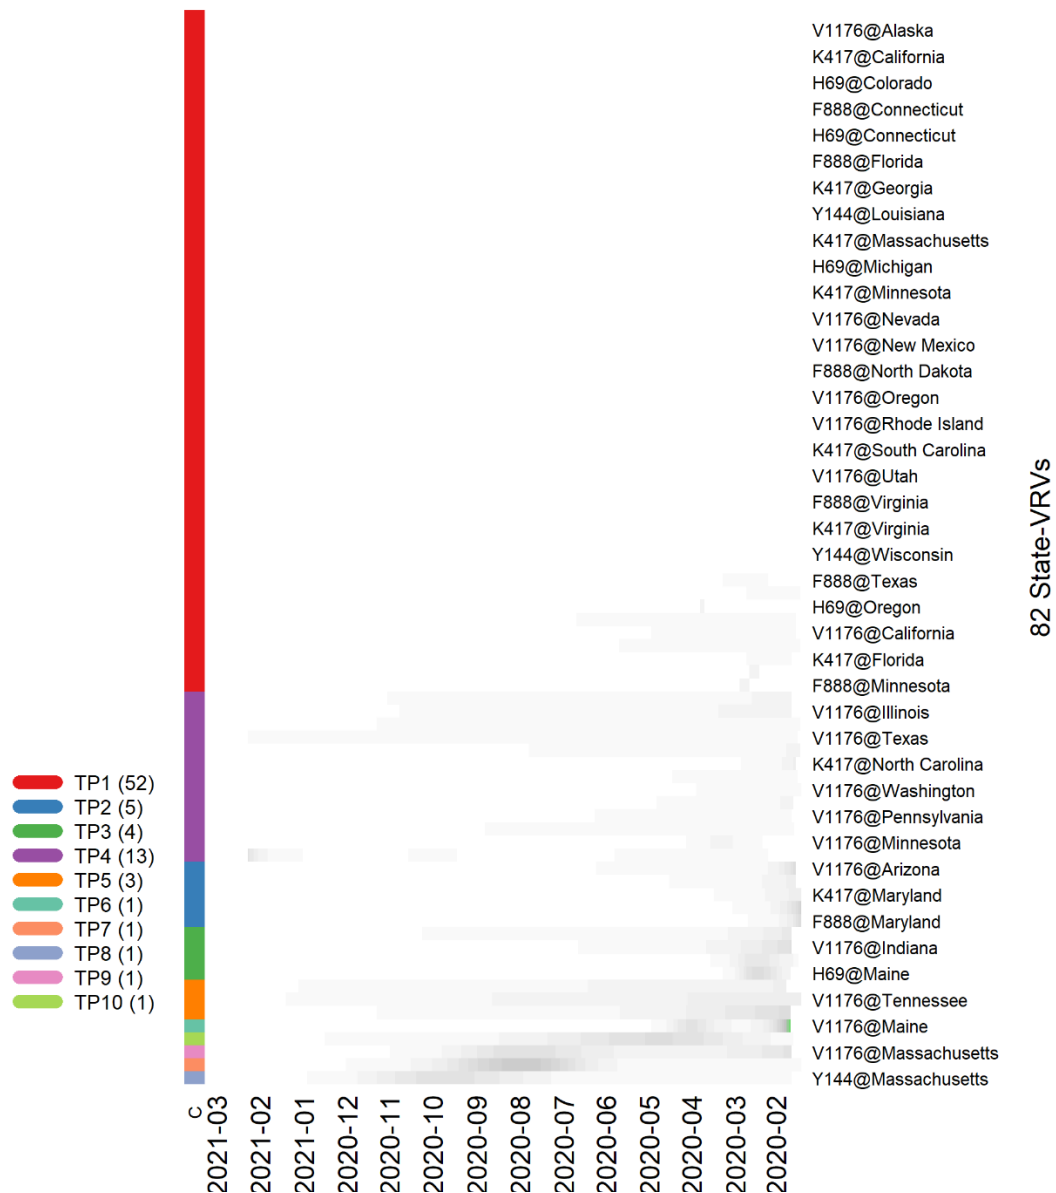

**Figure S4. Presence of VRVs among all cases in each state/territory.** A gray cell means the VRV was not identified in the given case; a black cell means that it was. Both cases and VRVs were clustered by two-way hierarchical cluster analysis. The “PG” (“patient group”) and “RG” (“residue group”) labels in the lower left corner of each plot correspond to the row (case) and column (VRV) clusters identified by two-way hierarchical cluster analysis, also identified by the vertical and horizontal color bars at the left and top, respectively, of each plot.

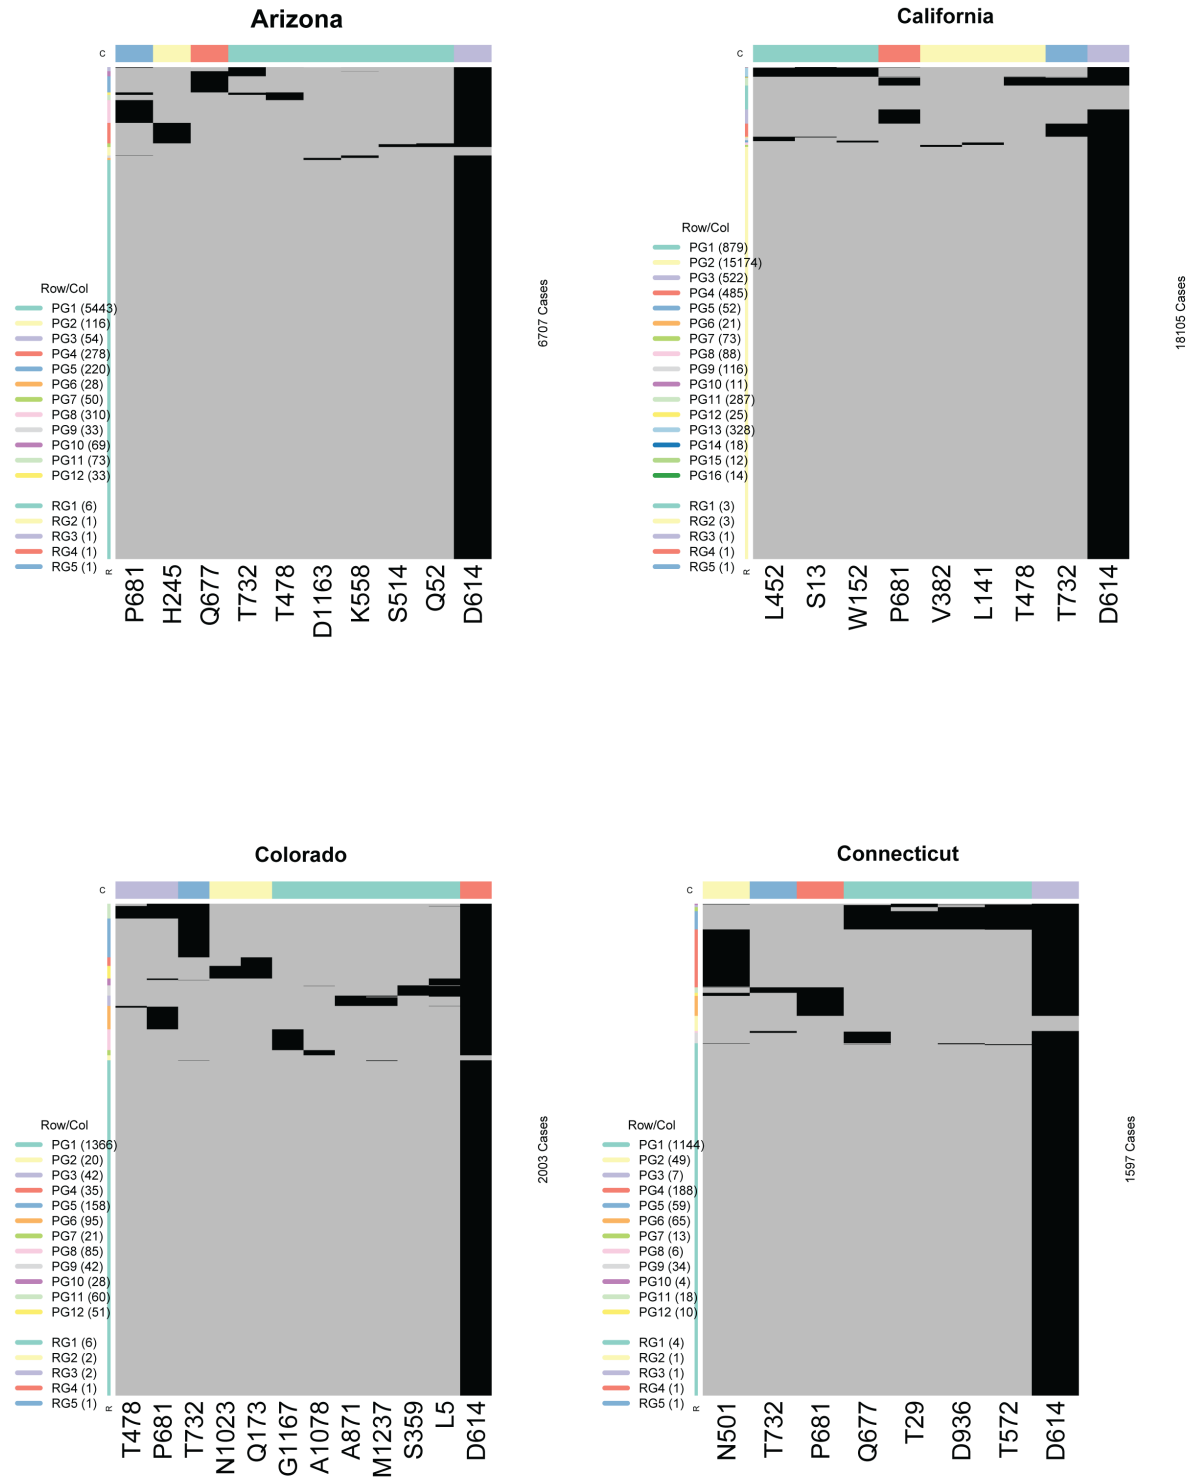

Figure S4 (continued).

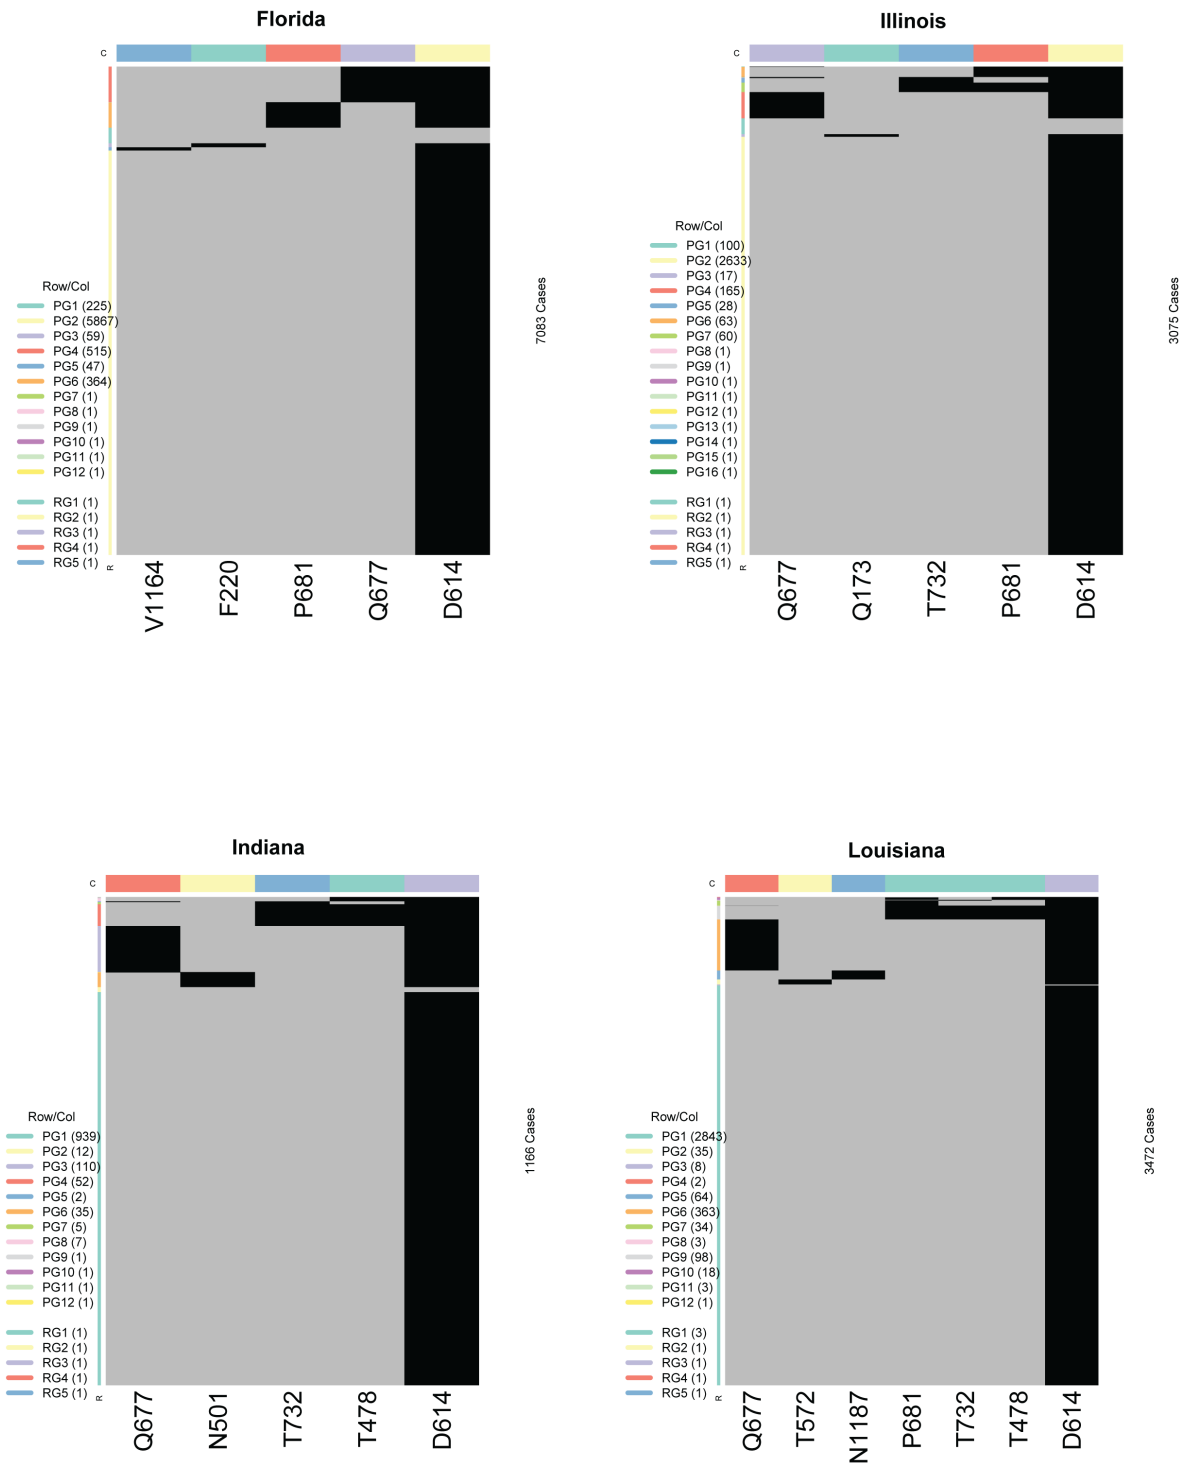

Figure S4 (continued).

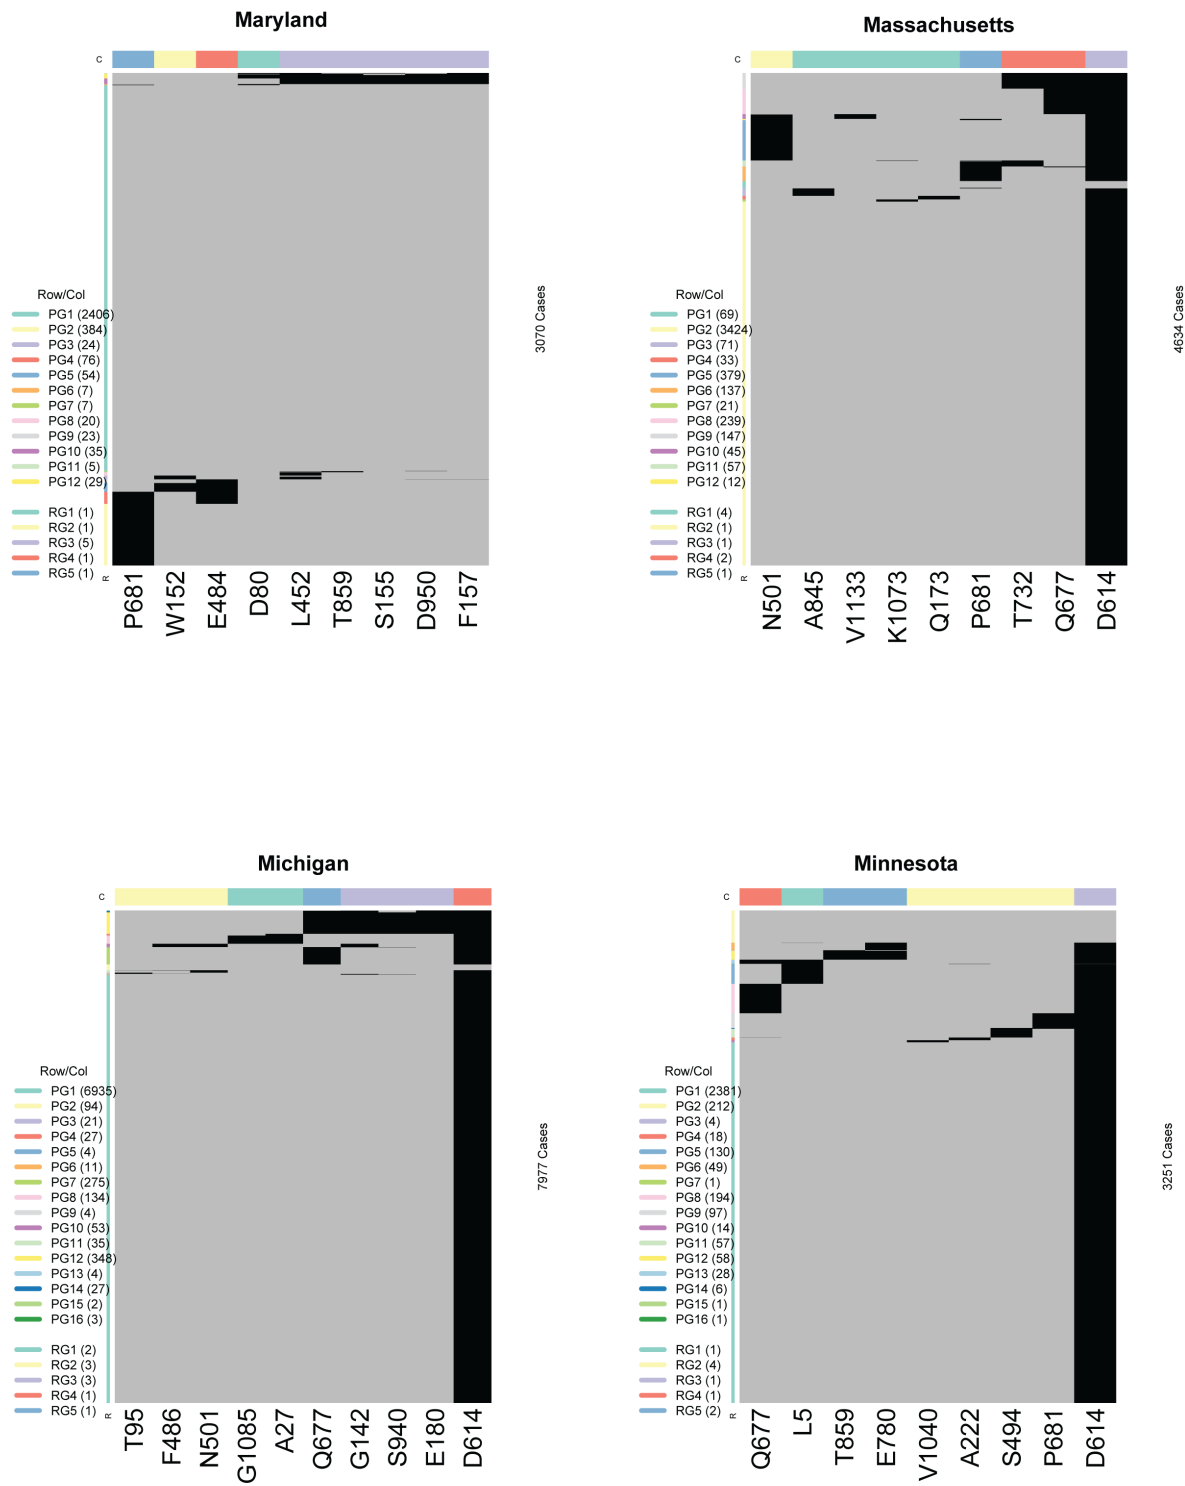

Figure S4 (continued).

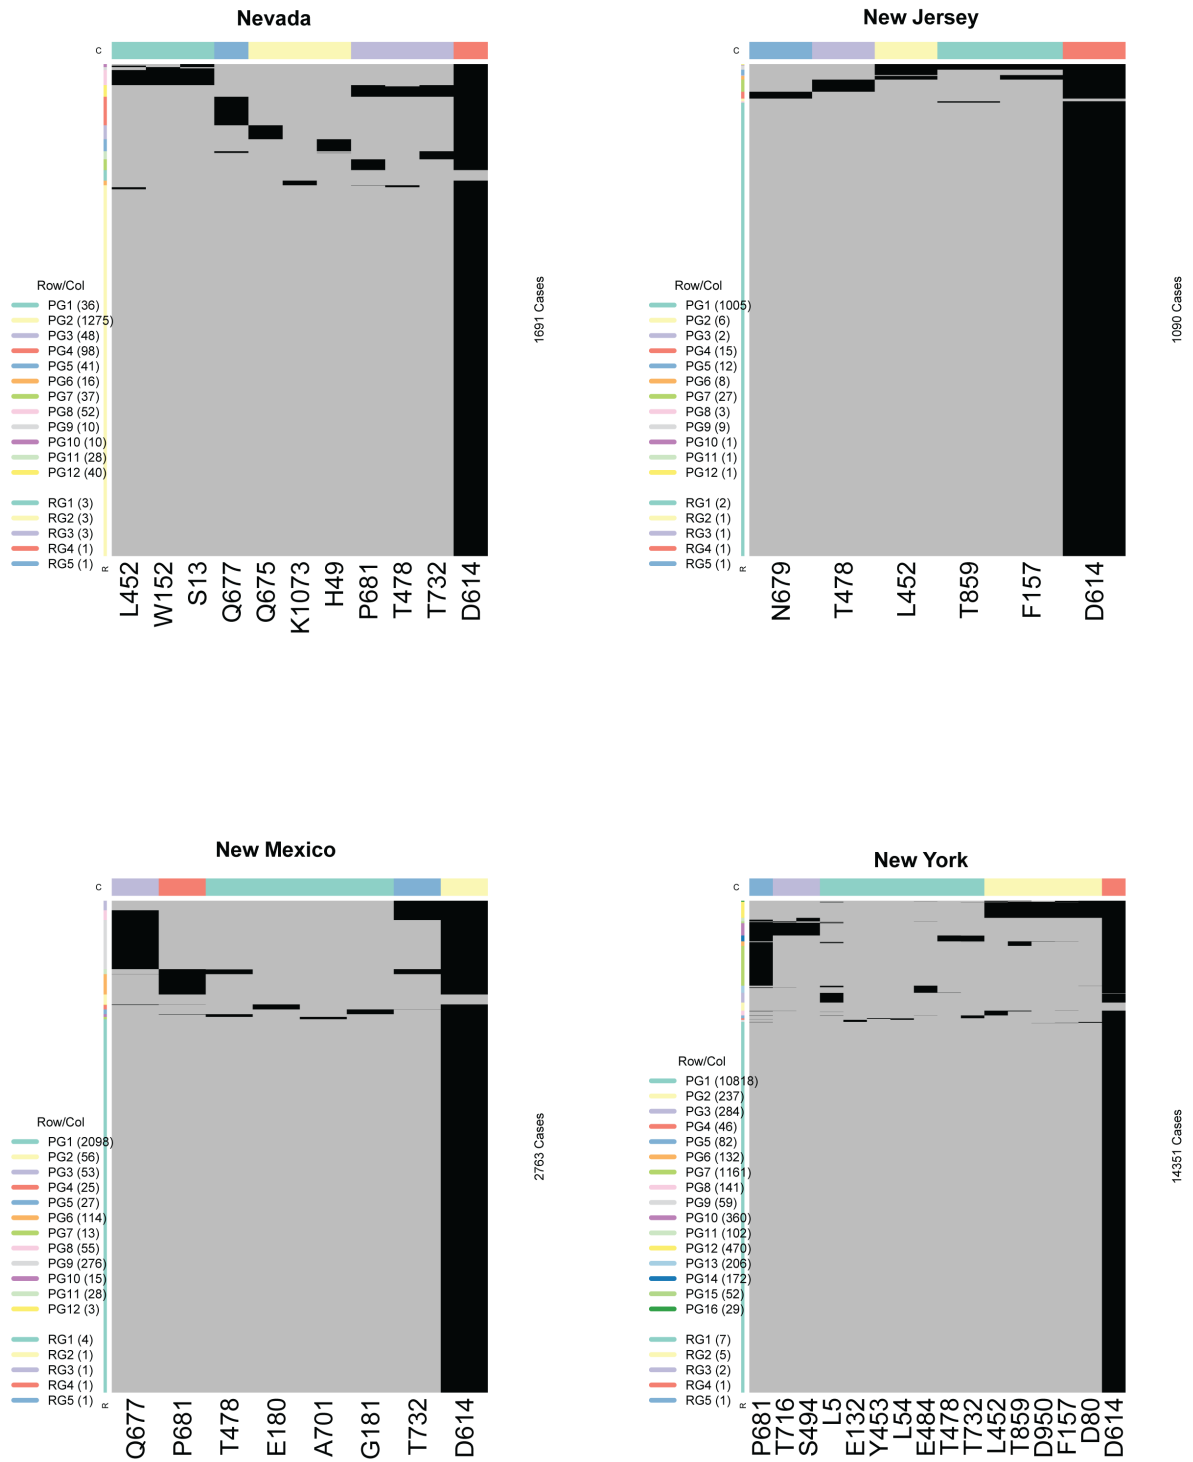



Figure S4 (continued).

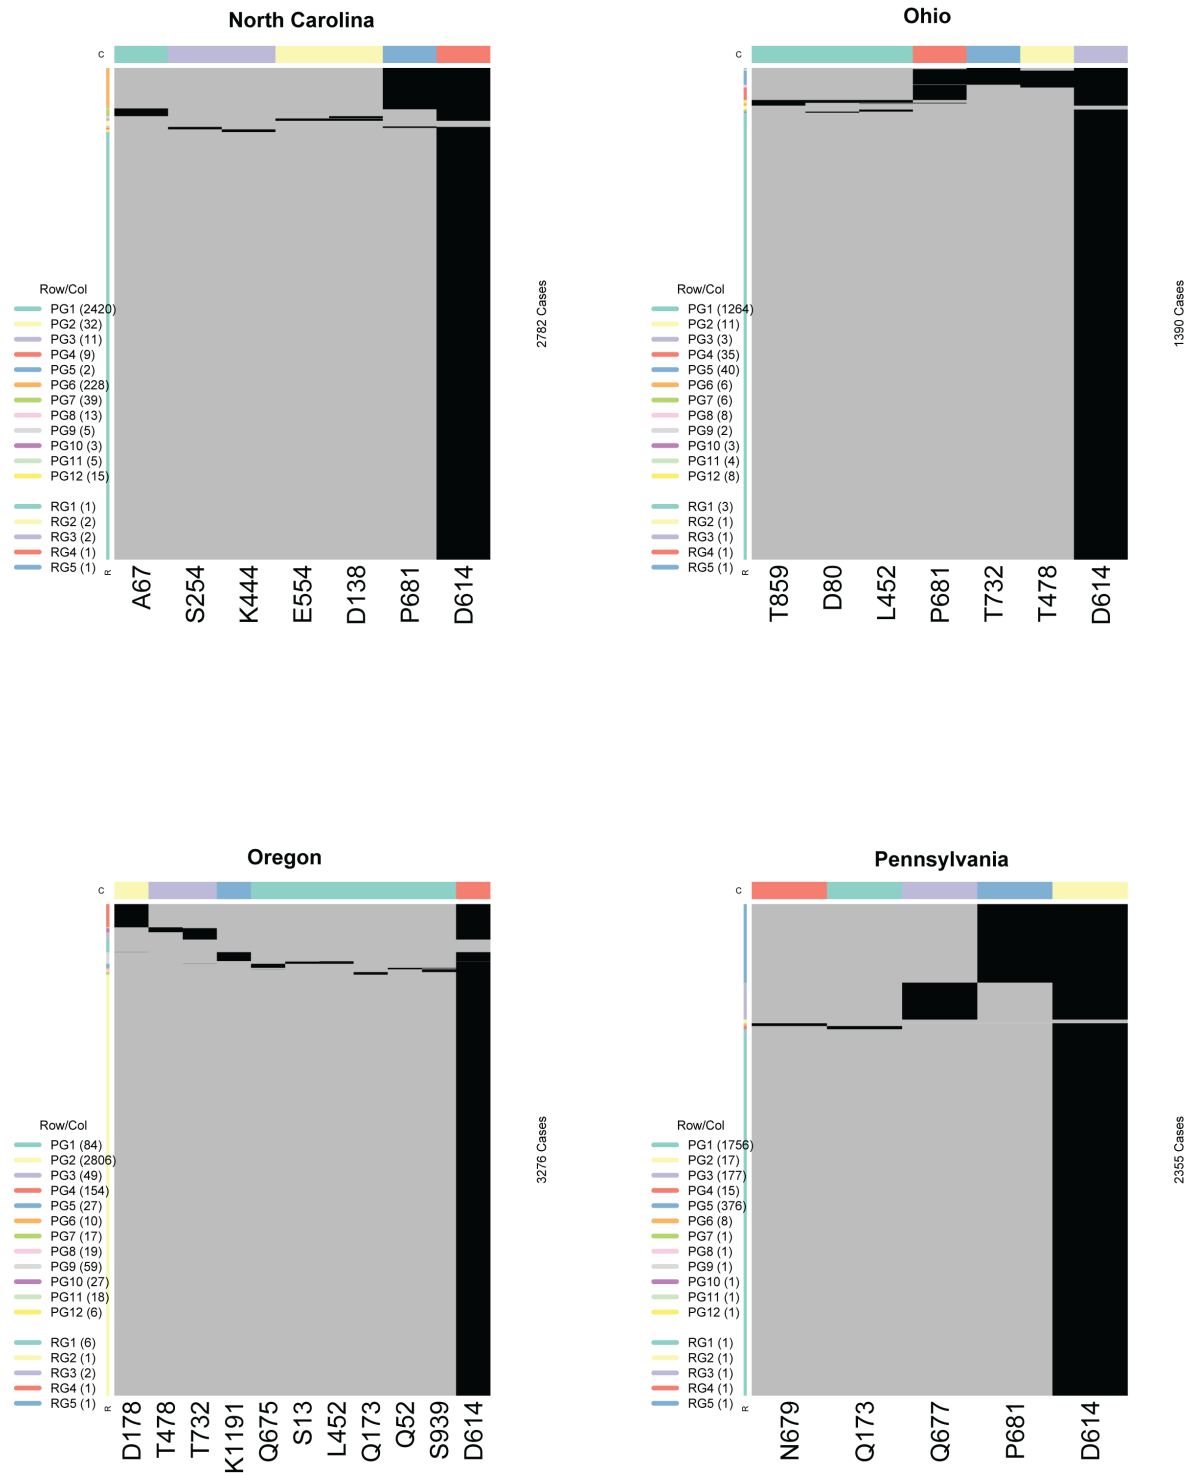

Figure S4 (continued).

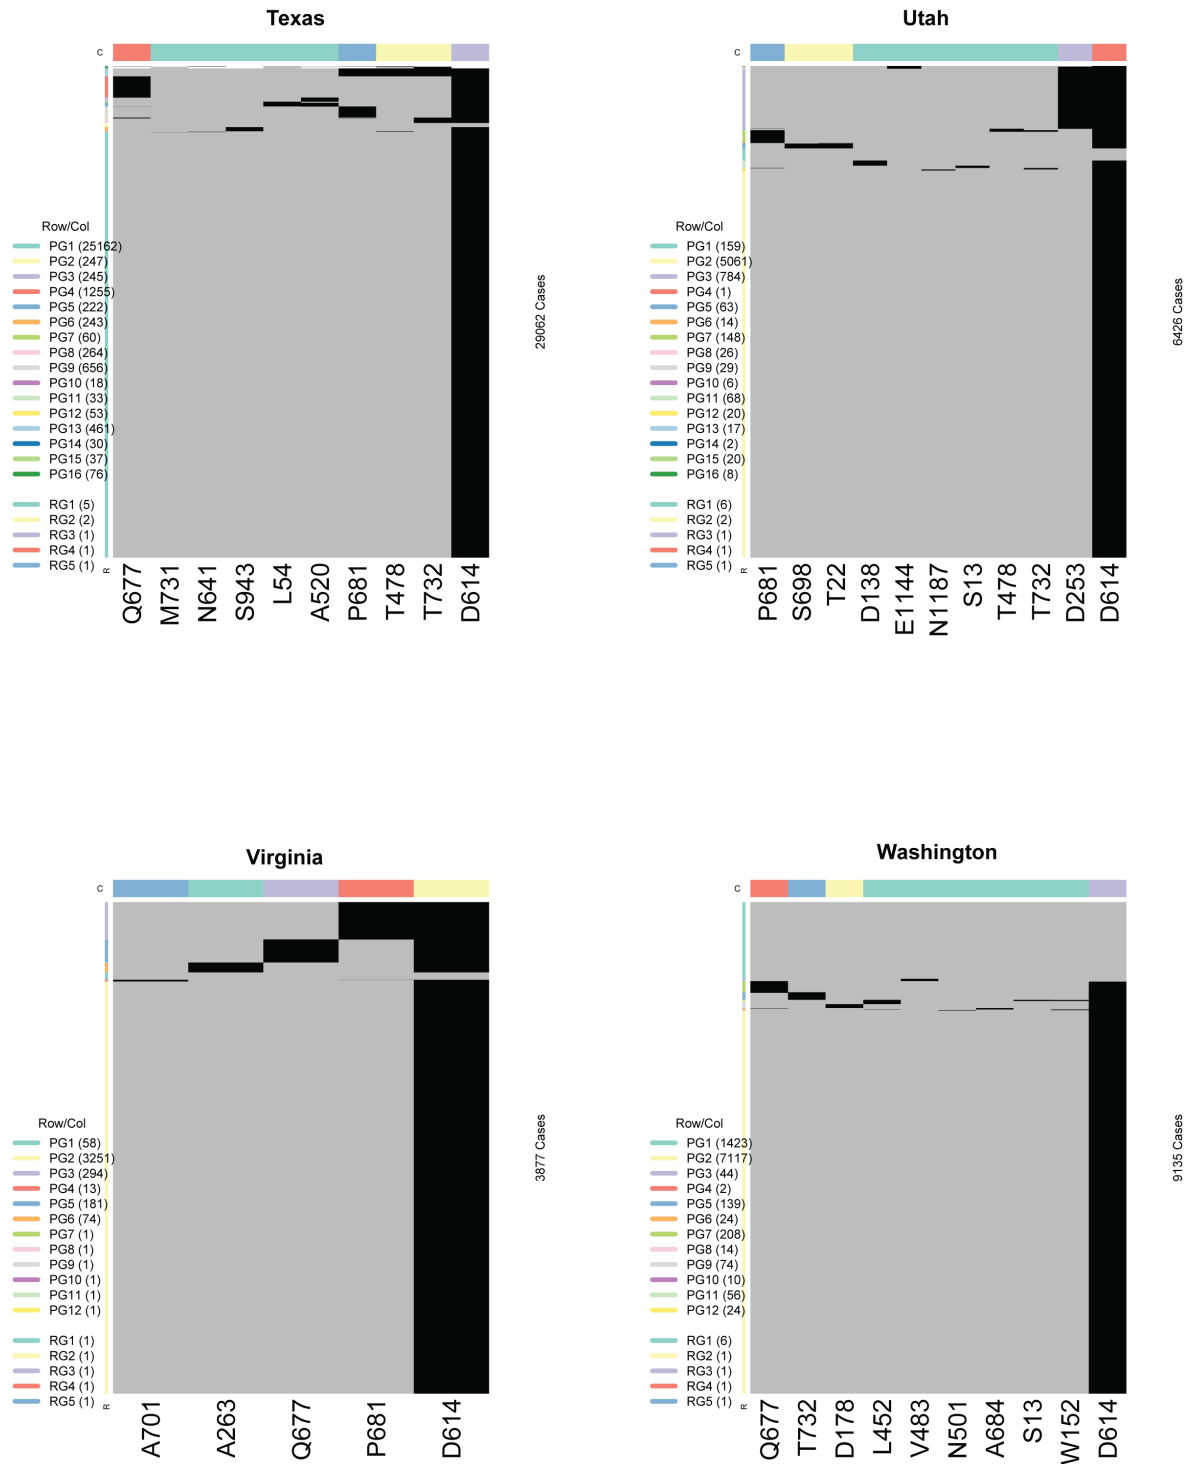

Figure S4 (continued).

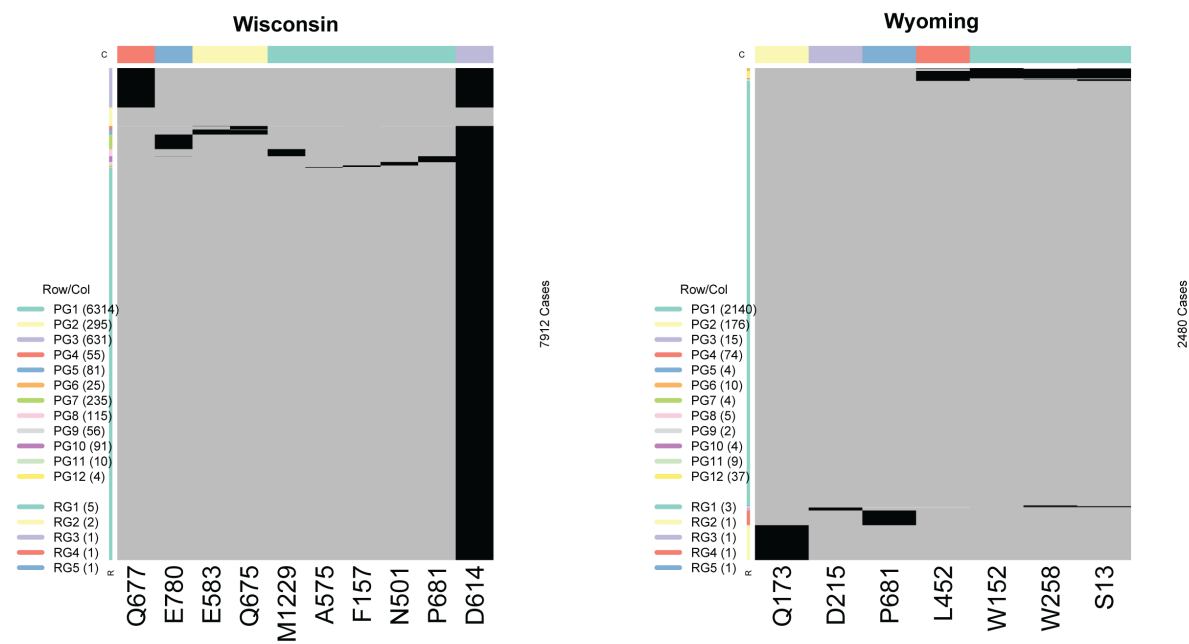

**Table S1. Distribution of the 21,391 VOI/VOC sequences by specific variant and by state/territory.**

| State/Territory | B.1.1.7 | B.1.351 | B.1.427 | B.1.429 | B.1.525 | B.1.526 | P.1 | P.2 |
|-----------------|---------|---------|---------|---------|---------|---------|-----|-----|
| Alabama         | 7       |         | 3       | 3       |         | 2       |     |     |
| Alaska          | 2       |         |         | 43      |         |         | 5   | 3   |
| Arizona         | 44      |         | 119     | 396     |         |         | 3   | 7   |
| Arkansas        |         |         | 4       | 3       |         |         |     |     |
| California      | 266     | 1       | 2432    | 5368    | 2       | 15      | 1   | 19  |
| Colorado        | 195     | 7       | 79      | 189     |         | 6       |     | 2   |
| Connecticut     | 146     | 2       | 18      | 57      | 5       | 40      |     | 3   |
| DC              | 10      |         | 4       | 9       | 1       | 1       |     |     |
| Delaware        | 8       | 1       | 3       | 5       | 1       | 26      |     |     |
| Florida         | 708     |         | 205     | 257     | 2       | 19      | 12  | 74  |
| Georgia         | 85      | 3       | 31      | 57      | 1       | 3       |     | 10  |
| Hawaii          | 2       |         | 7       | 18      |         |         |     |     |
| Idaho           | 8       | 2       | 1       | 11      |         |         |     |     |
| Illinois        | 100     | 1       | 16      | 69      | 1       | 1       | 1   | 10  |
| Indiana         | 18      |         | 23      | 20      | 1       | 1       |     | 24  |
| Iowa            | 8       |         | 7       | 4       |         |         |     |     |
| Kansas          | 28      |         | 10      | 23      |         |         |     |     |
| Kentucky        | 8       |         | 2       | 11      |         |         |     | 6   |
| Louisiana       | 38      |         | 4       | 32      |         | 1       |     |     |
| Maine           | 3       | 1       | 2       | 30      |         | 5       |     | 19  |
| Maryland        | 220     | 20      | 7       | 55      | 4       | 27      | 1   | 7   |
| Massachusetts   | 100     | 4       | 8       | 38      |         | 10      |     | 30  |
| Michigan        | 706     | 1       | 48      | 83      | 5       | 7       |     | 14  |
| Minnesota       | 249     | 1       | 20      | 77      | 3       | 1       | 2   | 4   |
| Mississippi     |         |         | 6       | 4       |         |         |     | 1   |
| Missouri        |         |         | 3       | 28      |         |         |     | 4   |
| Montana         | 3       |         | 4       | 17      |         | 1       |     |     |
| Nebraska        | 6       |         | 4       | 15      |         |         | 2   |     |
| Nevada          | 12      | 2       | 198     | 643     |         | 1       |     | 4   |
| New Hampshire   | 5       |         | 3       | 5       |         |         |     | 7   |
| New Jersey      | 182     |         | 24      | 15      | 1       | 79      | 2   | 2   |
| New Mexico      | 17      |         | 38      | 125     |         |         |     | 1   |
| New York        | 769     | 3       | 103     | 174     | 16      | 2121    |     | 21  |
| North Carolina  | 34      | 9       | 30      | 60      |         | 13      |     | 21  |
| North Dakota    | 7       |         | 2       | 5       | 5       |         |     |     |
| Ohio            | 74      |         | 12      | 34      | 1       | 1       | 1   | 22  |
| Oklahoma        | 8       |         | 1       | 4       |         |         | 1   |     |
| Oregon          | 17      |         | 34      | 135     |         | 1       | 1   | 1   |
| Pennsylvania    | 51      |         | 23      | 74      |         | 10      |     | 11  |
| Puerto Rico     | 8       |         | 1       | 6       |         |         |     | 3   |
| Rhode Island    | 19      |         |         | 16      | 1       | 6       |     |     |
| South Carolina  | 1       | 6       | 4       | 25      |         | 2       |     | 3   |
| South Dakota    | 5       |         |         |         |         |         |     |     |
| Tennessee       | 16      |         | 11      | 10      |         |         |     | 2   |
| Texas           | 506     | 2       | 71      | 449     | 10      | 16      | 6   | 81  |
| Utah            | 37      |         | 27      | 90      |         | 1       |     |     |
| Vermont         | 1       |         |         | 5       |         | 2       |     |     |
| Virginia        | 26      | 4       | 62      | 76      | 4       | 1       |     | 27  |
| Washington      | 129     | 5       | 112     | 473     | 4       | 4       | 3   | 12  |
| Wisconsin       | 35      |         | 21      | 60      |         | 1       |     | 11  |
| Wyoming         | 10      | 1       | 34      | 65      |         | 14      |     |     |
| USA-other       | 7       |         | 1       | 4       |         |         |     |     |

“USA-Other” includes sequences from South Dakota, Vermont, and the Virgin Islands, in addition to sequences for which state information was missing.

**Table S2. Distribution of the 167,893 SARS-CoV-2 sequences by state/territory and by GISAID submission month, along with state/territory-specific distribution of the 21,391 VOI/VOC excluded sequences.**

| ID | State          | 2020-01 | 2020-02 | 2020-03 | 2020-04 | 2020-05 | 2020-06 | 2020-07 | 2020-08 | 2020-09 | 2020-10 | 2020-11 | 2020-12 | 2021-01 | 2021-02 | 2021-03 | VOI/<br>VOC |
|----|----------------|---------|---------|---------|---------|---------|---------|---------|---------|---------|---------|---------|---------|---------|---------|---------|-------------|
| 1  | Alabama        |         |         | 5       | 5       | 7       |         | 3       | 5       | 1       | 232     | 613     | 538     | 342     | 204     | 4       | 15          |
| 2  | Alaska         |         |         | 25      | 10      | 1       | 42      | 60      |         | 1       |         | 82      | 51      | 81      | 219     |         | 53          |
| 3  | Arizona        | 1       |         | 179     | 861     | 618     | 989     | 558     | 113     | 70      | 309     | 601     | 729     | 1130    | 546     | 3       | 569         |
| 4  | Arkansas       |         |         | 13      |         |         | 1       | 65      | 1       | 13      | 6       |         | 17      | 174     | 99      | 4       | 7           |
| 5  | California     | 6       | 21      | 1392    | 1228    | 1022    | 859     | 1345    | 665     | 718     | 564     | 1822    | 3115    | 3495    | 1776    | 77      | 8104        |
| 6  | Colorado       |         |         | 66      | 148     | 53      | 14      | 26      | 51      | 114     | 61      | 289     | 71      | 614     | 447     | 49      | 478         |
| 7  | Connecticut    |         |         | 272     | 207     | 40      | 7       | 9       | 29      | 31      | 22      | 55      | 121     | 360     | 409     | 35      | 271         |
| 8  | DC             |         |         | 96      | 2       | 5       | 2       | 13      |         |         | 2       | 17      | 93      | 144     | 122     |         | 25          |
| 9  | Delaware       |         |         | 105     | 14      | 31      | 23      | 6       | 22      | 33      | 50      | 35      | 91      | 264     | 77      | 21      | 44          |
| 10 | Florida        |         | 3       | 351     | 630     | 198     | 308     | 580     | 336     | 240     | 210     | 298     | 406     | 1138    | 2364    | 21      | 1277        |
| 11 | Georgia        |         | 2       | 94      | 26      | 2       | 18      | 30      | 16      | 20      | 85      | 47      | 428     | 720     | 1103    | 16      | 190         |
| 12 | Hawaii         |         |         | 30      | 28      | 5       | 42      | 60      | 171     | 111     | 107     | 105     | 210     | 89      | 23      |         | 27          |
| 13 | Idaho          |         |         | 161     | 33      | 2       | 4       | 9       | 8       | 1       | 3       | 15      | 15      | 49      | 35      | 3       | 22          |
| 14 | Illinois       | 2       |         | 181     | 286     | 116     | 162     | 279     | 25      | 72      | 172     | 144     | 518     | 677     | 440     | 1       | 199         |
| 15 | Indiana        |         |         | 264     | 9       |         |         | 2       |         |         |         | 7       | 96      | 288     | 501     |         | 87          |
| 16 | Iowa           |         |         | 20      | 18      | 6       | 19      | 8       | 10      | 20      | 10      | 30      | 19      | 91      | 38      |         | 19          |
| 17 | Kansas         |         |         | 21      | 19      | 10      | 9       | 127     | 26      | 9       | 8       | 43      | 103     | 310     | 169     | 10      | 61          |
| 18 | Kentucky       |         |         | 27      | 20      | 5       | 16      | 1       | 3       | 12      | 18      | 41      | 51      | 237     | 146     |         | 27          |
| 19 | Louisiana      |         |         | 108     | 645     | 201     | 225     | 320     | 307     | 61      | 51      | 169     | 505     | 546     | 324     | 10      | 75          |
| 20 | Maine          |         |         | 106     |         | 1       | 9       |         | 10      | 100     | 18      | 89      | 276     | 614     | 328     | 8       | 60          |
| 21 | Maryland       |         |         | 118     | 57      | 105     | 31      | 30      | 1       | 38      | 163     | 216     | 439     | 1074    | 725     | 73      | 341         |
| 22 | Massachusetts  | 1       |         | 312     | 725     | 376     | 28      | 39      | 48      | 164     | 101     | 196     | 387     | 1064    | 1170    | 23      | 190         |
| 23 | Michigan       |         |         | 1570    | 755     | 197     | 39      | 95      | 135     | 264     | 741     | 1605    | 231     | 1019    | 1228    | 98      | 864         |
| 24 | Minnesota      |         |         | 579     | 325     | 208     | 111     | 49      | 102     | 88      | 171     | 190     | 304     | 648     | 474     | 2       | 357         |
| 25 | Mississippi    |         |         | 21      | 5       |         |         | 4       | 13      | 14      | 2       | 26      | 26      | 136     | 111     | 4       | 11          |
| 26 | Missouri       |         |         | 28      |         |         | 25      | 1       | 12      | 10      | 11      | 21      | 107     | 309     | 179     | 2       | 35          |
| 27 | Montana        |         |         | 1       | 1       | 3       | 20      | 37      | 4       |         | 6       | 4       | 38      | 64      | 30      |         | 25          |
| 28 | Nebraska       |         |         | 7       | 1       | 97      |         | 5       | 8       | 11      | 7       | 22      | 34      | 124     | 148     | 10      | 27          |
| 29 | Nevada         |         | 1       | 80      | 66      | 53      | 3       |         | 57      | 21      | 185     | 17      | 88      | 676     | 417     | 27      | 860         |
| 30 | New Hampshire  |         | 1       | 5       | 4       | 5       | 2       | 1       |         |         |         | 9       | 46      | 126     | 246     | 5       | 20          |
| 31 | New Jersey     |         |         | 80      | 24      | 1       | 4       | 2       | 4       | 5       | 15      | 11      | 192     | 354     | 393     | 6       | 305         |
| 32 | New Mexico     |         |         | 63      | 154     | 282     | 64      | 46      | 162     | 145     | 109     | 162     | 282     | 913     | 357     | 24      | 181         |
| 33 | New York       | 1       | 2       | 2179    | 1074    | 257     | 65      | 105     | 176     | 313     | 613     | 523     | 2144    | 3700    | 2871    | 328     | 3207        |
| 34 | North Carolina |         |         | 18      | 45      | 11      | 33      | 54      | 133     | 23      | 10      | 37      | 128     | 980     | 1289    | 21      | 167         |
| 35 | North Dakota   |         |         | 41      | 1       | 3       | 4       | 1       | 5       | 2       | 30      | 52      | 20      | 183     | 6       |         | 19          |
| 36 | Ohio           |         | 1       | 72      | 63      | 5       | 4       | 33      | 9       | 3       | 4       | 63      | 144     | 482     | 491     | 16      | 145         |
| 37 | Oklahoma       |         |         | 9       | 1       | 3       |         | 7       | 11      | 8       | 15      | 27      | 22      | 188     | 76      |         | 14          |
| 38 | Oregon         |         | 1       | 67      | 148     | 138     | 332     | 342     | 226     | 143     | 288     | 320     | 533     | 624     | 113     | 1       | 189         |
| 39 | Pennsylvania   |         |         | 101     | 84      | 7       | 15      | 21      | 8       | 36      | 43      | 57      | 292     | 408     | 1275    | 8       | 169         |
| 40 | Puerto Rico    |         |         | 20      | 16      | 1       | 8       | 25      | 54      | 25      | 35      | 11      | 24      | 67      | 17      |         | 18          |
| 41 | Rhode Island   |         | 1       | 5       | 8       | 3       | 2       | 6       | 1       |         | 2       | 38      | 95      | 180     | 228     | 2       | 42          |
| 42 | South Carolina |         |         | 29      | 11      | 32      | 99      | 64      | 2       | 6       | 1       | 7       | 27      | 325     | 203     | 1       | 41          |
| 43 | South Dakota   |         |         |         | 4       | 7       | 3       | 10      | 8       | 13      | 34      | 11      | 36      | 12      | 10      |         | 5           |
| 44 | Tennessee      |         |         | 10      | 1       |         |         |         | 3       |         | 8       | 70      | 34      | 189     | 138     | 2       | 39          |
| 45 | Texas          |         | 2       | 504     | 725     | 789     | 5448    | 3214    | 1494    | 794     | 1931    | 2895    | 943     | 5702    | 4101    | 520     | 1141        |
| 46 | Utah           |         |         | 397     | 948     | 1428    | 469     | 369     | 626     | 43      | 159     | 177     | 980     | 696     | 133     | 1       | 155         |
| 47 | Vermont        |         |         | 4       | 1       | 1       | 3       |         |         |         |         | 4       | 6       | 44      | 59      | 2       | 8           |
| 48 | Virginia       |         |         | 153     | 390     | 217     | 116     | 179     | 186     | 135     | 186     | 244     | 402     | 838     | 825     | 6       | 200         |
| 49 | Washington     | 4       | 58      | 1625    | 855     | 892     | 1353    | 165     | 575     | 186     | 286     | 476     | 596     | 1161    | 886     | 17      | 742         |
| 50 | Wisconsin      | 1       |         | 375     | 399     | 194     | 387     | 389     | 323     | 1126    | 1056    | 721     | 969     | 1180    | 719     | 74      | 128         |
| 51 | Wyoming        |         |         | 97      | 16      | 4       | 12      | 60      | 53      | 2       | 60      | 92      | 900     | 921     | 262     | 1       | 124         |
| 52 | USA            | 25      |         | 77      | 109     | 4       | 9       | 86      | 1       | 1       | 1       |         | 98      | 17      | 3       |         | 12          |

“USA includes sequences from South Dakota, Vermont, and the Virgin Islands, in addition to sequences for which state information was missing.

**Table S3. The 10 identified geo-VRV clusters (TP1 through TP10), based on temporal profiles.**

| ID | CLS | #  | State          | VRV   | p        | q        | Pmax     |
|----|-----|----|----------------|-------|----------|----------|----------|
| 1  | TP1 | 1  | Alabama        | E484  | 1.41E-04 | 2.61E-03 | 1.26E-01 |
| 2  | TP1 | 2  | Alaska         | V1228 | 3.02E-04 | 2.32E-03 | 1.70E-01 |
| 3  | TP1 | 3  | Arizona        | Q52   | 1.00E-10 | 1.10E-09 | 1.32E-01 |
| 4  | TP1 | 4  | Arizona        | H245  | 1.00E-10 | 1.10E-09 | 2.49E-01 |
| 5  | TP1 | 5  | Arizona        | S514  | 1.00E-10 | 1.10E-09 | 4.47E-01 |
| 6  | TP1 | 6  | Arizona        | K558  | 1.00E-10 | 1.10E-09 | 5.59E-01 |
| 7  | TP1 | 7  | Arizona        | D1163 | 1.08E-06 | 9.96E-06 | 1.15E-01 |
| 8  | TP1 | 8  | California     | L141  | 1.00E-10 | 1.14E-09 | 1.01E-01 |
| 9  | TP1 | 9  | California     | V382  | 1.00E-10 | 1.14E-09 | 1.50E-01 |
| 10 | TP1 | 10 | Colorado       | L5    | 4.80E-04 | 3.32E-03 | 2.92E-01 |
| 11 | TP1 | 11 | Colorado       | Q173  | 5.14E-05 | 5.14E-04 | 2.77E-01 |
| 12 | TP1 | 12 | Colorado       | S359  | 1.00E-10 | 1.13E-09 | 3.58E-01 |
| 13 | TP1 | 13 | Colorado       | N1023 | 3.10E-04 | 2.32E-03 | 1.02E-01 |
| 14 | TP1 | 14 | Colorado       | A1078 | 1.00E-10 | 1.13E-09 | 2.46E-01 |
| 15 | TP1 | 15 | Connecticut    | T732  | 5.26E-05 | 4.91E-04 | 1.24E-01 |
| 16 | TP1 | 16 | Florida        | F220  | 1.00E-10 | 2.91E-09 | 1.75E-01 |
| 17 | TP1 | 17 | Florida        | V1164 | 3.18E-06 | 6.73E-05 | 3.49E-01 |
| 18 | TP1 | 18 | Georgia        | A263  | 1.02E-05 | 3.15E-04 | 3.62E-01 |
| 19 | TP1 | 19 | Illinois       | Q173  | 3.41E-04 | 5.49E-03 | 1.12E-01 |
| 20 | TP1 | 20 | Louisiana      | T572  | 3.81E-06 | 4.90E-05 | 2.54E-01 |
| 21 | TP1 | 21 | Louisiana      | N1187 | 1.00E-10 | 1.50E-09 | 3.49E-01 |
| 22 | TP1 | 22 | Maine          | G72   | 3.34E-05 | 8.12E-04 | 1.59E-01 |
| 23 | TP1 | 23 | Maine          | E484  | 1.02E-06 | 3.71E-05 | 1.32E-01 |
| 24 | TP1 | 24 | Massachusetts  | Q173  | 1.00E-10 | 2.00E-09 | 2.53E-01 |
| 25 | TP1 | 25 | Massachusetts  | A845  | 1.00E-10 | 2.00E-09 | 1.20E-01 |
| 26 | TP1 | 26 | Massachusetts  | K1073 | 1.00E-10 | 2.00E-09 | 2.16E-01 |
| 27 | TP1 | 27 | Massachusetts  | V1133 | 8.17E-04 | 7.35E-03 | 1.66E-01 |
| 28 | TP1 | 28 | Michigan       | A27   | 1.00E-10 | 1.02E-09 | 2.58E-01 |
| 29 | TP1 | 29 | Michigan       | T95   | 1.00E-10 | 1.02E-09 | 2.01E-01 |
| 30 | TP1 | 30 | Michigan       | F486  | 3.18E-07 | 3.05E-06 | 2.65E-01 |
| 31 | TP1 | 31 | Michigan       | N501  | 1.00E-10 | 1.02E-09 | 2.24E-01 |
| 32 | TP1 | 32 | Michigan       | G1085 | 1.00E-10 | 1.02E-09 | 2.71E-01 |
| 33 | TP1 | 33 | Minnesota      | L5    | 1.00E-10 | 1.67E-09 | 2.51E-01 |
| 34 | TP1 | 34 | Minnesota      | A222  | 1.00E-10 | 1.67E-09 | 1.76E-01 |
| 35 | TP1 | 35 | Minnesota      | S494  | 1.32E-05 | 1.55E-04 | 1.56E-01 |
| 36 | TP1 | 36 | Minnesota      | E780  | 1.00E-10 | 1.67E-09 | 1.39E-01 |
| 37 | TP1 | 37 | Minnesota      | T859  | 1.00E-10 | 1.67E-09 | 1.20E-01 |
| 38 | TP1 | 38 | Minnesota      | V1040 | 9.48E-06 | 1.23E-04 | 2.47E-01 |
| 39 | TP1 | 39 | Nebraska       | N856  | 1.67E-05 | 2.01E-04 | 3.00E-01 |
| 40 | TP1 | 40 | Nevada         | H49   | 1.00E-10 | 4.90E-09 | 1.20E-01 |
| 41 | TP1 | 41 | Nevada         | Q675  | 4.07E-04 | 3.99E-03 | 1.15E-01 |
| 42 | TP1 | 42 | Nevada         | K1073 | 9.42E-05 | 1.20E-03 | 4.90E-01 |
| 43 | TP1 | 43 | New Jersey     | N679  | 3.17E-04 | 3.85E-03 | 1.29E-01 |
| 44 | TP1 | 44 | New Mexico     | E180  | 1.00E-10 | 5.85E-09 | 3.55E-01 |
| 45 | TP1 | 45 | New Mexico     | G181  | 3.93E-06 | 6.79E-05 | 1.38E-01 |
| 46 | TP1 | 46 | New Mexico     | A701  | 9.61E-04 | 9.37E-03 | 1.75E-01 |
| 47 | TP1 | 47 | New York       | L54   | 1.00E-10 | 7.97E-10 | 1.93E-01 |
| 48 | TP1 | 48 | New York       | E132  | 1.00E-10 | 7.97E-10 | 3.51E-01 |
| 49 | TP1 | 49 | New York       | Y453  | 1.00E-10 | 7.97E-10 | 7.52E-01 |
| 50 | TP1 | 50 | New York       | T478  | 1.00E-10 | 7.97E-10 | 7.79E-01 |
| 51 | TP1 | 51 | New York       | E484  | 1.00E-10 | 7.97E-10 | 1.07E-01 |
| 52 | TP1 | 52 | New York       | T732  | 1.00E-10 | 7.97E-10 | 4.38E-01 |
| 53 | TP1 | 53 | North Carolina | A67   | 1.00E-10 | 3.25E-09 | 2.05E-01 |
| 54 | TP1 | 54 | North Carolina | D138  | 1.00E-10 | 3.25E-09 | 1.78E-01 |
| 55 | TP1 | 55 | North Carolina | K444  | 7.75E-06 | 2.01E-04 | 1.81E-01 |
| 56 | TP1 | 56 | North Carolina | E554  | 1.00E-10 | 3.25E-09 | 2.31E-01 |
| 57 | TP1 | 57 | Oregon         | D178  | 1.00E-10 | 2.54E-09 | 1.82E-01 |

|     |      |    |               |       |          |          |          |
|-----|------|----|---------------|-------|----------|----------|----------|
| 58  | TP1  | 58 | Oregon        | K1191 | 1.18E-05 | 1.50E-04 | 1.02E-01 |
| 59  | TP1  | 59 | Pennsylvania  | Q173  | 1.01E-05 | 5.84E-04 | 1.01E-01 |
| 60  | TP1  | 60 | Pennsylvania  | N679  | 2.73E-05 | 7.91E-04 | 1.36E-01 |
| 61  | TP1  | 61 | Puerto Rico   | D253  | 3.82E-04 | 2.42E-03 | 3.53E-01 |
| 62  | TP1  | 62 | Texas         | L54   | 1.00E-10 | 1.48E-09 | 4.61E-01 |
| 63  | TP1  | 63 | Texas         | A520  | 1.00E-10 | 1.48E-09 | 2.37E-01 |
| 64  | TP1  | 64 | Texas         | N641  | 1.00E-10 | 1.48E-09 | 1.12E-01 |
| 65  | TP1  | 65 | Texas         | M731  | 1.10E-04 | 1.24E-03 | 1.67E-01 |
| 66  | TP1  | 66 | Texas         | S943  | 1.00E-10 | 1.48E-09 | 1.63E-01 |
| 67  | TP1  | 67 | Utah          | S13   | 1.00E-10 | 9.75E-10 | 9.43E-01 |
| 68  | TP1  | 68 | Utah          | T22   | 1.00E-10 | 9.75E-10 | 1.09E-01 |
| 69  | TP1  | 69 | Utah          | D253  | 1.00E-10 | 9.75E-10 | 4.58E-01 |
| 70  | TP1  | 70 | Utah          | S698  | 1.00E-10 | 9.75E-10 | 1.19E-01 |
| 71  | TP1  | 71 | Utah          | N1187 | 8.01E-04 | 5.00E-03 | 3.45E-01 |
| 72  | TP1  | 72 | Virginia      | A263  | 1.00E-10 | 2.90E-09 | 1.69E-01 |
| 73  | TP1  | 73 | Virginia      | A701  | 4.00E-05 | 4.83E-04 | 2.75E-01 |
| 74  | TP1  | 74 | Washington    | S13   | 1.00E-10 | 1.81E-09 | 1.77E-01 |
| 75  | TP1  | 75 | Washington    | W152  | 1.00E-10 | 1.81E-09 | 1.33E-01 |
| 76  | TP1  | 76 | Washington    | V483  | 2.32E-06 | 3.30E-05 | 1.36E-01 |
| 77  | TP1  | 77 | Washington    | N501  | 4.61E-04 | 3.61E-03 | 2.22E-01 |
| 78  | TP1  | 78 | Washington    | A684  | 1.00E-10 | 1.81E-09 | 1.15E-01 |
| 79  | TP1  | 79 | Wisconsin     | F157  | 1.00E-10 | 1.30E-09 | 1.01E-01 |
| 80  | TP1  | 80 | Wisconsin     | N501  | 1.00E-10 | 1.30E-09 | 1.66E-01 |
| 81  | TP1  | 81 | Wisconsin     | A575  | 1.77E-06 | 1.97E-05 | 1.06E-01 |
| 82  | TP1  | 82 | Wisconsin     | E583  | 1.00E-10 | 1.30E-09 | 1.33E-01 |
| 83  | TP1  | 83 | Wisconsin     | Q675  | 1.00E-10 | 1.30E-09 | 1.31E-01 |
| 84  | TP1  | 84 | Wisconsin     | P681  | 1.00E-10 | 1.30E-09 | 1.04E-01 |
| 85  | TP1  | 85 | Wisconsin     | E780  | 1.00E-10 | 1.30E-09 | 2.16E-01 |
| 86  | TP1  | 86 | Wisconsin     | M1229 | 1.00E-10 | 1.30E-09 | 1.03E-01 |
| 87  | TP1  | 87 | Wyoming       | Q173  | 9.60E-06 | 1.78E-04 | 1.32E-01 |
| 88  | TP1  | 88 | Wyoming       | D215  | 1.00E-10 | 2.17E-09 | 1.54E-01 |
| 89  | TP10 | 1  | Puerto Rico   | T20   | 1.00E-10 | 9.50E-10 | 7.32E-01 |
| 90  | TP2  | 1  | Alabama       | D614  | 1.00E-10 | 3.70E-09 | 1.00E+00 |
| 91  | TP2  | 2  | Alaska        | D614  | 1.00E-10 | 1.15E-09 | 1.00E+00 |
| 92  | TP2  | 3  | Arizona       | D614  | 1.00E-10 | 1.10E-09 | 9.98E-01 |
| 93  | TP2  | 4  | Arkansas      | D614  | 1.00E-10 | 1.70E-09 | 1.00E+00 |
| 94  | TP2  | 5  | California    | D614  | 1.00E-10 | 1.14E-09 | 1.00E+00 |
| 95  | TP2  | 6  | Colorado      | D614  | 1.00E-10 | 1.13E-09 | 1.00E+00 |
| 96  | TP2  | 7  | Connecticut   | D614  | 1.11E-06 | 1.56E-05 | 1.00E+00 |
| 97  | TP2  | 8  | Delaware      | D614  | 1.00E-10 | 5.30E-09 | 9.96E-01 |
| 98  | TP2  | 9  | Florida       | D614  | 1.00E-10 | 2.91E-09 | 1.00E+00 |
| 99  | TP2  | 10 | Georgia       | D614  | 1.00E-10 | 6.15E-09 | 1.00E+00 |
| 100 | TP2  | 11 | Hawaii        | D614  | 1.07E-07 | 1.07E-06 | 9.99E-01 |
| 101 | TP2  | 12 | Illinois      | D614  | 1.00E-10 | 3.23E-09 | 1.00E+00 |
| 102 | TP2  | 13 | Indiana       | D614  | 4.97E-04 | 7.46E-03 | 9.99E-01 |
| 103 | TP2  | 14 | Iowa          | D614  | 1.00E-10 | 1.20E-09 | 1.00E+00 |
| 104 | TP2  | 15 | Kansas        | D614  | 1.00E-10 | 4.10E-09 | 1.00E+00 |
| 105 | TP2  | 16 | Kentucky      | D614  | 1.00E-10 | 3.40E-09 | 1.00E+00 |
| 106 | TP2  | 17 | Louisiana     | D614  | 1.00E-10 | 1.50E-09 | 1.00E+00 |
| 107 | TP2  | 18 | Maine         | D614  | 4.55E-04 | 8.31E-03 | 1.00E+00 |
| 108 | TP2  | 19 | Massachusetts | D614  | 1.00E-10 | 2.00E-09 | 1.00E+00 |
| 109 | TP2  | 20 | Michigan      | D614  | 1.00E-10 | 1.02E-09 | 1.00E+00 |
| 110 | TP2  | 21 | Minnesota     | D614  | 1.00E-10 | 1.67E-09 | 1.00E+00 |
| 111 | TP2  | 22 | Mississippi   | D614  | 1.00E-10 | 1.80E-09 | 1.00E+00 |
| 112 | TP2  | 23 | Missouri      | D614  | 1.00E-10 | 3.50E-09 | 1.00E+00 |
| 113 | TP2  | 24 | Montana       | D614  | 1.00E-10 | 1.00E-09 | 1.00E+00 |
| 114 | TP2  | 25 | Nebraska      | D614  | 1.00E-10 | 2.40E-09 | 1.00E+00 |
| 115 | TP2  | 26 | Nevada        | D614  | 8.86E-07 | 2.48E-05 | 1.00E+00 |
| 116 | TP2  | 27 | New Hampshire | D614  | 1.00E-10 | 4.50E-09 | 1.00E+00 |

|     |     |    |                |       |          |          |          |
|-----|-----|----|----------------|-------|----------|----------|----------|
| 117 | TP2 | 28 | New Jersey     | D614  | 1.00E-10 | 7.30E-09 | 1.00E+00 |
| 118 | TP2 | 29 | New Mexico     | D614  | 1.77E-06 | 5.19E-05 | 1.00E+00 |
| 119 | TP2 | 30 | New York       | D614  | 1.00E-10 | 7.97E-10 | 1.00E+00 |
| 120 | TP2 | 31 | North Carolina | D614  | 1.00E-10 | 3.25E-09 | 9.97E-01 |
| 121 | TP2 | 32 | North Dakota   | D614  | 1.00E-10 | 1.60E-09 | 1.00E+00 |
| 122 | TP2 | 33 | Ohio           | D614  | 1.05E-05 | 1.26E-04 | 1.00E+00 |
| 123 | TP2 | 34 | Oklahoma       | D614  | 1.00E-10 | 2.30E-09 | 1.00E+00 |
| 124 | TP2 | 35 | Oregon         | D614  | 1.00E-10 | 2.54E-09 | 1.00E+00 |
| 125 | TP2 | 36 | Pennsylvania   | D614  | 2.43E-05 | 7.91E-04 | 1.00E+00 |
| 126 | TP2 | 37 | Puerto Rico    | D614  | 1.00E-10 | 9.50E-10 | 1.00E+00 |
| 127 | TP2 | 38 | Rhode Island   | D614  | 1.00E-10 | 4.00E-09 | 1.00E+00 |
| 128 | TP2 | 39 | South Carolina | D614  | 1.00E-10 | 4.50E-09 | 9.99E-01 |
| 129 | TP2 | 40 | Tennessee      | D614  | 1.00E-10 | 3.30E-09 | 1.00E+00 |
| 130 | TP2 | 41 | Texas          | D614  | 1.00E-10 | 1.48E-09 | 1.00E+00 |
| 131 | TP2 | 42 | Utah           | D614  | 1.00E-10 | 9.75E-10 | 1.00E+00 |
| 132 | TP2 | 43 | Virginia       | D614  | 1.00E-10 | 2.90E-09 | 1.00E+00 |
| 133 | TP2 | 44 | Washington     | D614  | 1.00E-10 | 1.81E-09 | 1.00E+00 |
| 134 | TP2 | 45 | Wisconsin      | D614  | 1.00E-10 | 1.30E-09 | 1.00E+00 |
| 135 | TP2 | 46 | USA(others)    | D614  | 1.00E-10 | 5.10E-09 | 1.00E+00 |
| 136 | TP3 | 1  | Alabama        | Q677  | 1.00E-10 | 3.70E-09 | 4.12E-01 |
| 137 | TP3 | 2  | Arizona        | Q677  | 1.00E-10 | 1.10E-09 | 1.03E-01 |
| 138 | TP3 | 3  | Arizona        | P681  | 1.00E-10 | 1.10E-09 | 2.48E-01 |
| 139 | TP3 | 4  | California     | P681  | 1.00E-10 | 1.14E-09 | 2.92E-01 |
| 140 | TP3 | 5  | California     | T732  | 1.00E-10 | 1.14E-09 | 2.14E-01 |
| 141 | TP3 | 6  | Colorado       | P681  | 1.00E-10 | 1.13E-09 | 2.28E-01 |
| 142 | TP3 | 7  | Connecticut    | N501  | 1.00E-10 | 1.68E-09 | 3.09E-01 |
| 143 | TP3 | 8  | Florida        | Q677  | 1.00E-10 | 2.91E-09 | 1.85E-01 |
| 144 | TP3 | 9  | Hawaii         | Q677  | 9.11E-06 | 6.08E-05 | 4.57E-01 |
| 145 | TP3 | 10 | Illinois       | Q677  | 1.00E-10 | 3.23E-09 | 1.91E-01 |
| 146 | TP3 | 11 | Indiana        | Q677  | 4.97E-05 | 1.49E-03 | 2.01E-01 |
| 147 | TP3 | 12 | Louisiana      | T478  | 1.00E-10 | 1.50E-09 | 4.27E-01 |
| 148 | TP3 | 13 | Louisiana      | P681  | 1.00E-10 | 1.50E-09 | 5.19E-01 |
| 149 | TP3 | 14 | Louisiana      | T732  | 1.00E-10 | 1.50E-09 | 4.58E-01 |
| 150 | TP3 | 15 | Maryland       | P681  | 1.00E-10 | 1.74E-09 | 2.35E-01 |
| 151 | TP3 | 16 | Massachusetts  | N501  | 7.76E-05 | 9.98E-04 | 2.80E-01 |
| 152 | TP3 | 17 | Massachusetts  | Q677  | 1.00E-10 | 2.00E-09 | 1.82E-01 |
| 153 | TP3 | 18 | Michigan       | G142  | 1.00E-10 | 1.02E-09 | 3.12E-01 |
| 154 | TP3 | 19 | Michigan       | E180  | 1.00E-10 | 1.02E-09 | 3.24E-01 |
| 155 | TP3 | 20 | Michigan       | Q677  | 1.00E-10 | 1.02E-09 | 3.36E-01 |
| 156 | TP3 | 21 | Michigan       | S940  | 1.00E-10 | 1.02E-09 | 2.97E-01 |
| 157 | TP3 | 22 | Minnesota      | Q677  | 1.00E-10 | 1.67E-09 | 1.48E-01 |
| 158 | TP3 | 23 | New Mexico     | Q677  | 3.03E-06 | 6.79E-05 | 2.31E-01 |
| 159 | TP3 | 24 | New York       | P681  | 1.00E-10 | 7.97E-10 | 5.58E-01 |
| 160 | TP3 | 25 | Pennsylvania   | P681  | 5.30E-04 | 8.79E-03 | 1.99E-01 |
| 161 | TP3 | 26 | Texas          | Q677  | 1.00E-10 | 1.48E-09 | 1.48E-01 |
| 162 | TP3 | 27 | Utah           | P681  | 1.00E-10 | 9.75E-10 | 2.35E-01 |
| 163 | TP3 | 28 | Virginia       | P681  | 1.00E-10 | 2.90E-09 | 1.86E-01 |
| 164 | TP3 | 29 | Wisconsin      | Q677  | 1.00E-10 | 1.30E-09 | 1.61E-01 |
| 165 | TP3 | 30 | Wyoming        | S13   | 1.00E-10 | 2.17E-09 | 4.67E-01 |
| 166 | TP4 | 1  | Alaska         | G75   | 1.00E-10 | 1.15E-09 | 9.10E-01 |
| 167 | TP5 | 1  | Arizona        | T478  | 1.00E-10 | 1.10E-09 | 1.03E-01 |
| 168 | TP5 | 2  | Arizona        | T732  | 1.00E-10 | 1.10E-09 | 1.49E-01 |
| 169 | TP5 | 3  | California     | S13   | 1.00E-10 | 1.14E-09 | 1.27E-01 |
| 170 | TP5 | 4  | California     | W152  | 1.00E-10 | 1.14E-09 | 1.15E-01 |
| 171 | TP5 | 5  | California     | L452  | 1.00E-10 | 1.14E-09 | 1.43E-01 |
| 172 | TP5 | 6  | California     | T478  | 1.00E-10 | 1.14E-09 | 2.26E-01 |
| 173 | TP5 | 7  | Colorado       | T478  | 1.00E-10 | 1.13E-09 | 1.70E-01 |
| 174 | TP5 | 8  | Colorado       | A871  | 1.00E-10 | 1.13E-09 | 2.22E-01 |
| 175 | TP5 | 9  | Colorado       | G1167 | 1.37E-04 | 1.23E-03 | 1.13E-01 |



|     |     |    |                |       |          |          |          |
|-----|-----|----|----------------|-------|----------|----------|----------|
| 176 | TP5 | 10 | Colorado       | M1237 | 1.00E-10 | 1.13E-09 | 2.75E-01 |
| 177 | TP5 | 11 | Connecticut    | P681  | 4.88E-05 | 4.91E-04 | 1.79E-01 |
| 178 | TP5 | 12 | DC             | E484  | 3.08E-04 | 3.69E-03 | 2.72E-01 |
| 179 | TP5 | 13 | Delaware       | Q677  | 2.21E-04 | 5.85E-03 | 1.53E-01 |
| 180 | TP5 | 14 | Florida        | P681  | 1.00E-10 | 2.91E-09 | 1.30E-01 |
| 181 | TP5 | 15 | Illinois       | P681  | 1.00E-10 | 3.23E-09 | 2.00E-01 |
| 182 | TP5 | 16 | Illinois       | T732  | 1.00E-10 | 3.23E-09 | 1.11E-01 |
| 183 | TP5 | 17 | Indiana        | T478  | 3.60E-06 | 2.16E-04 | 1.78E-01 |
| 184 | TP5 | 18 | Indiana        | T732  | 3.63E-04 | 7.26E-03 | 1.51E-01 |
| 185 | TP5 | 19 | Kansas         | P681  | 2.50E-04 | 3.41E-03 | 1.99E-01 |
| 186 | TP5 | 20 | Kansas         | E780  | 9.05E-05 | 1.86E-03 | 3.04E-01 |
| 187 | TP5 | 21 | Kentucky       | G257  | 1.27E-06 | 2.17E-05 | 3.42E-01 |
| 188 | TP5 | 22 | Maine          | A520  | 1.00E-10 | 7.30E-09 | 2.26E-01 |
| 189 | TP5 | 23 | Maryland       | D80   | 1.00E-10 | 1.74E-09 | 4.94E-01 |
| 190 | TP5 | 24 | Maryland       | W152  | 1.00E-10 | 1.74E-09 | 1.36E-01 |
| 191 | TP5 | 25 | Maryland       | S155  | 1.00E-10 | 1.74E-09 | 7.14E-01 |
| 192 | TP5 | 26 | Maryland       | F157  | 1.00E-10 | 1.74E-09 | 6.57E-01 |
| 193 | TP5 | 27 | Maryland       | L452  | 1.00E-10 | 1.74E-09 | 5.69E-01 |
| 194 | TP5 | 28 | Maryland       | E484  | 1.00E-10 | 1.74E-09 | 1.81E-01 |
| 195 | TP5 | 29 | Maryland       | T859  | 1.00E-10 | 1.74E-09 | 6.73E-01 |
| 196 | TP5 | 30 | Maryland       | D950  | 2.53E-05 | 3.51E-04 | 6.28E-01 |
| 197 | TP5 | 31 | Massachusetts  | P681  | 1.00E-10 | 2.00E-09 | 1.33E-01 |
| 198 | TP5 | 32 | Massachusetts  | T732  | 1.00E-10 | 2.00E-09 | 1.28E-01 |
| 199 | TP5 | 33 | Minnesota      | P681  | 1.00E-10 | 1.67E-09 | 1.55E-01 |
| 200 | TP5 | 34 | Mississippi    | P681  | 4.48E-04 | 2.69E-03 | 2.73E-01 |
| 201 | TP5 | 35 | Nevada         | S13   | 1.00E-10 | 4.90E-09 | 2.31E-01 |
| 202 | TP5 | 36 | Nevada         | W152  | 9.82E-05 | 1.20E-03 | 1.53E-01 |
| 203 | TP5 | 37 | Nevada         | L452  | 6.05E-04 | 5.39E-03 | 1.44E-01 |
| 204 | TP5 | 38 | Nevada         | T478  | 1.74E-04 | 1.90E-03 | 1.53E-01 |
| 205 | TP5 | 39 | Nevada         | Q677  | 3.72E-05 | 6.08E-04 | 3.09E-01 |
| 206 | TP5 | 40 | Nevada         | P681  | 1.26E-06 | 2.48E-05 | 1.72E-01 |
| 207 | TP5 | 41 | Nevada         | T732  | 1.11E-06 | 2.48E-05 | 1.50E-01 |
| 208 | TP5 | 42 | New Jersey     | F157  | 3.92E-05 | 7.16E-04 | 2.46E-01 |
| 209 | TP5 | 43 | New Jersey     | L452  | 3.20E-05 | 7.16E-04 | 1.41E-01 |
| 210 | TP5 | 44 | New Jersey     | T478  | 2.91E-06 | 1.06E-04 | 2.00E-01 |
| 211 | TP5 | 45 | New Jersey     | T859  | 2.66E-04 | 3.85E-03 | 1.88E-01 |
| 212 | TP5 | 46 | New Mexico     | T478  | 4.06E-06 | 6.79E-05 | 1.30E-01 |
| 213 | TP5 | 47 | New Mexico     | P681  | 6.50E-06 | 9.51E-05 | 1.60E-01 |
| 214 | TP5 | 48 | New Mexico     | T732  | 1.00E-10 | 5.85E-09 | 1.71E-01 |
| 215 | TP5 | 49 | New York       | L5    | 1.00E-10 | 7.97E-10 | 1.19E-01 |
| 216 | TP5 | 50 | New York       | D80   | 1.00E-10 | 7.97E-10 | 2.76E-01 |
| 217 | TP5 | 51 | New York       | F157  | 1.00E-10 | 7.97E-10 | 2.94E-01 |
| 218 | TP5 | 52 | New York       | L452  | 1.00E-10 | 7.97E-10 | 3.27E-01 |
| 219 | TP5 | 53 | New York       | S494  | 1.00E-10 | 7.97E-10 | 1.91E-01 |
| 220 | TP5 | 54 | New York       | T716  | 1.00E-10 | 7.97E-10 | 1.88E-01 |
| 221 | TP5 | 55 | New York       | T859  | 1.00E-10 | 7.97E-10 | 2.91E-01 |
| 222 | TP5 | 56 | New York       | D950  | 1.00E-10 | 7.97E-10 | 2.65E-01 |
| 223 | TP5 | 57 | North Carolina | P681  | 4.22E-05 | 7.83E-04 | 1.49E-01 |
| 224 | TP5 | 58 | Ohio           | D80   | 9.98E-06 | 1.26E-04 | 4.58E-01 |
| 225 | TP5 | 59 | Ohio           | L452  | 2.73E-05 | 2.80E-04 | 4.36E-01 |
| 226 | TP5 | 60 | Ohio           | T478  | 1.00E-10 | 7.20E-09 | 2.30E-01 |
| 227 | TP5 | 61 | Ohio           | P681  | 3.05E-06 | 6.04E-05 | 1.83E-01 |
| 228 | TP5 | 62 | Ohio           | T732  | 1.81E-07 | 6.52E-06 | 2.12E-01 |
| 229 | TP5 | 63 | Ohio           | T859  | 3.35E-06 | 6.04E-05 | 4.33E-01 |
| 230 | TP5 | 64 | Oregon         | S13   | 3.65E-06 | 5.79E-05 | 1.72E-01 |
| 231 | TP5 | 65 | Oregon         | Q52   | 2.68E-04 | 2.27E-03 | 1.75E-01 |
| 232 | TP5 | 66 | Oregon         | Q173  | 7.88E-06 | 1.11E-04 | 1.49E-01 |
| 233 | TP5 | 67 | Oregon         | L452  | 2.02E-06 | 3.66E-05 | 1.57E-01 |
| 234 | TP5 | 68 | Oregon         | T478  | 9.45E-05 | 9.23E-04 | 1.35E-01 |

|     |     |    |              |       |          |          |          |
|-----|-----|----|--------------|-------|----------|----------|----------|
| 235 | TP5 | 69 | Oregon       | Q675  | 1.00E-10 | 2.54E-09 | 1.03E-01 |
| 236 | TP5 | 70 | Oregon       | T732  | 4.45E-04 | 3.33E-03 | 1.00E-01 |
| 237 | TP5 | 71 | Oregon       | S939  | 1.00E-10 | 2.54E-09 | 2.95E-01 |
| 238 | TP5 | 72 | Pennsylvania | Q677  | 1.31E-06 | 1.52E-04 | 1.21E-01 |
| 239 | TP5 | 73 | Texas        | T478  | 1.00E-10 | 1.48E-09 | 1.01E-01 |
| 240 | TP5 | 74 | Texas        | P681  | 1.00E-10 | 1.48E-09 | 1.67E-01 |
| 241 | TP5 | 75 | Texas        | T732  | 1.00E-10 | 1.48E-09 | 1.41E-01 |
| 242 | TP5 | 76 | Utah         | D138  | 1.00E-10 | 9.75E-10 | 1.33E-01 |
| 243 | TP5 | 77 | Utah         | T478  | 1.00E-10 | 9.75E-10 | 2.44E-01 |
| 244 | TP5 | 78 | Utah         | T732  | 5.14E-04 | 3.49E-03 | 2.14E-01 |
| 245 | TP5 | 79 | Utah         | E1144 | 1.00E-10 | 9.75E-10 | 2.65E-01 |
| 246 | TP5 | 80 | Virginia     | E484  | 1.00E-10 | 2.90E-09 | 1.30E-01 |
| 247 | TP5 | 81 | Virginia     | Q677  | 1.00E-10 | 2.90E-09 | 1.70E-01 |
| 248 | TP5 | 82 | Washington   | D178  | 1.00E-10 | 1.81E-09 | 3.85E-01 |
| 249 | TP5 | 83 | Washington   | L452  | 9.34E-05 | 8.44E-04 | 2.53E-01 |
| 250 | TP5 | 84 | Washington   | Q677  | 1.00E-10 | 1.81E-09 | 1.19E-01 |
| 251 | TP5 | 85 | Washington   | T732  | 1.00E-10 | 1.81E-09 | 1.31E-01 |
| 252 | TP5 | 86 | Wyoming      | W152  | 1.00E-10 | 2.17E-09 | 1.83E-01 |
| 253 | TP5 | 87 | Wyoming      | W258  | 1.00E-10 | 2.17E-09 | 2.14E-01 |
| 254 | TP5 | 88 | Wyoming      | L452  | 1.00E-10 | 2.17E-09 | 1.71E-01 |
| 255 | TP5 | 89 | Wyoming      | P681  | 1.00E-10 | 2.17E-09 | 1.49E-01 |
| 256 | TP6 | 1  | Colorado     | T732  | 1.00E-10 | 1.13E-09 | 3.97E-01 |
| 257 | TP6 | 2  | Connecticut  | T29   | 1.00E-10 | 1.68E-09 | 4.90E-01 |
| 258 | TP6 | 3  | Connecticut  | T572  | 1.00E-10 | 1.68E-09 | 5.63E-01 |
| 259 | TP6 | 4  | Connecticut  | Q677  | 1.00E-10 | 1.68E-09 | 6.30E-01 |
| 260 | TP6 | 5  | Connecticut  | D936  | 1.00E-10 | 1.68E-09 | 6.40E-01 |
| 261 | TP6 | 6  | Georgia      | D138  | 1.00E-10 | 6.15E-09 | 9.05E-01 |
| 262 | TP7 | 1  | DC           | D1168 | 1.57E-04 | 2.83E-03 | 5.13E-01 |
| 263 | TP7 | 2  | DC           | V1264 | 3.27E-07 | 1.18E-05 | 8.18E-01 |
| 264 | TP7 | 3  | Louisiana    | Q677  | 1.00E-10 | 1.50E-09 | 5.11E-01 |
| 265 | TP8 | 1  | Hawaii       | P681  | 1.00E-10 | 2.00E-09 | 9.87E-01 |
| 266 | TP9 | 1  | Mississippi  | L5    | 3.42E-04 | 2.69E-03 | 8.54E-01 |

**Table S4. Frequencies of the 90 viral residue variants (VRVs) by state/territory, from an unsupervised learning from bi-clustering of all States and VRVs.**

[illegible]

[illegible]

[illegible]

“Other” includes sequences from South Dakota, Vermont, and the Virgin Islands, in addition to sequences for which state information was missing.

**Table S5. VRV-haplotypes identified within each state/territory, along with state/territory-specific frequencies. The “positivity” column indicates the proportion of mutations in each haplotype block.**

| ID | state       | row  | Freq  | col             | # Hap                                     | positivity |
|----|-------------|------|-------|-----------------|-------------------------------------------|------------|
| 1  | Alabama     | PG1  | 1441  | D614            | 1 D614                                    | 1.00       |
| 2  | Alabama     | PG2  | 507   | D614,Q677       | 2 D614-Q677                               | 1.00       |
| 3  | Alabama     | PG3  | 6     | E484,D614       | 2 E484-D614                               | 1.00       |
| 4  | Alabama     | PG4  | 1     | E484,D614,Q677  | 3 E484-D614-Q677                          | 1.00       |
| 5  | Alabama     | PG5  | 1     | E484,D614       | 2 E484-D614                               | 1.00       |
| 6  | Alabama     | PG6  | 1     | E484,D614       | 2 E484-D614                               | 1.00       |
| 7  | Alabama     | PG7  | 1     | E484,D614       | 2 E484-D614                               | 1.00       |
| 8  | Alabama     | PG8  | 1     | E484,D614       | 2 E484-D614                               | 1.00       |
| 9  | Alaska      | PG1  | 515   | D614            | 1 D614                                    | 1.00       |
| 10 | Alaska      | PG3  | 16    | D614,V1228      | 2 D614-V1228                              | 1.00       |
| 11 | Alaska      | PG4  | 33    | G75,D614        | 2 G75-D614                                | 1.00       |
| 12 | Alaska      | PG5  | 1     | G75,D614        | 2 G75-D614                                | 1.00       |
| 13 | Alaska      | PG6  | 1     | G75,D614        | 2 G75-D614                                | 1.00       |
| 14 | Alaska      | PG7  | 1     | G75,D614        | 2 G75-D614                                | 1.00       |
| 15 | Alaska      | PG8  | 1     | G75,D614        | 2 G75-D614                                | 1.00       |
| 16 | Arizona     | PG1  | 5451  | RG3             | 1 D614                                    | 1.00       |
| 17 | Arizona     | PG4  | 278   | RG2,RG3         | 2 H245-D614                               | 1.00       |
| 18 | Arizona     | PG5  | 220   | RG3,RG4         | 2 D614-Q677                               | 1.00       |
| 19 | Arizona     | PG6  | 28    | RG1,RG3         | 7 Q52-T478-S514-K558-D614-T732-D1163      | 0.58       |
| 20 | Arizona     | PG7  | 50    | RG1,RG3         | 7 Q52-T478-S514-K558-D614-T732-D1163      | 0.65       |
| 21 | Arizona     | PG8  | 310   | RG3,RG5         | 2 D614-P681                               | 1.00       |
| 22 | Arizona     | PG9  | 33    | RG1,RG3         | 7 Q52-T478-S514-K558-D614-T732-D1163      | 0.58       |
| 23 | Arizona     | PG10 | 69    | RG1,RG3,RG4     | 8 Q52-T478-S514-K558-D614-Q677-T732-D1163 | 0.72       |
| 24 | Arizona     | PG11 | 73    | RG1,RG3         | 7 Q52-T478-S514-K558-D614-T732-D1163      | 0.58       |
| 25 | Arizona     | PG12 | 33    | RG1,RG3,RG5     | 8 Q52-T478-S514-K558-D614-P681-T732-D1163 | 0.77       |
| 26 | Arkansas    | PG1  | 390   | D614            | 1 D614                                    | 1.00       |
| 27 | California  | PG2  | 15193 | RG3             | 1 D614                                    | 1.00       |
| 28 | California  | PG3  | 522   | RG3,RG4         | 2 D614-P681                               | 1.00       |
| 29 | California  | PG4  | 485   | RG3,RG5         | 2 D614-T732                               | 1.00       |
| 30 | California  | PG5  | 52    | RG1,RG3         | 4 S13-W152-L452-D614                      | 0.64       |
| 31 | California  | PG6  | 21    | RG2,RG3,RG5     | 5 L141-V382-T478-D614-T732                | 0.52       |
| 32 | California  | PG7  | 73    | RG2,RG3         | 4 L141-V382-T478-D614                     | 0.67       |
| 33 | California  | PG8  | 88    | RG2,RG3         | 4 L141-V382-T478-D614                     | 0.67       |
| 34 | California  | PG9  | 116   | RG1,RG3         | 4 S13-W152-L452-D614                      | 0.67       |
| 35 | California  | PG10 | 11    | RG1,RG3,RG4     | 5 S13-W152-L452-D614-P681                 | 0.51       |
| 36 | California  | PG11 | 287   | RG2,RG3,RG4,RG5 | 6 L141-V382-T478-D614-P681-T732           | 0.83       |
| 37 | California  | PG12 | 25    | RG1,RG3         | 4 S13-W152-L452-D614                      | 0.83       |
| 38 | California  | PG13 | 328   | RG1,RG3         | 4 S13-W152-L452-D614                      | 1.00       |
| 39 | California  | PG14 | 18    | RG1,RG3         | 4 S13-W152-L452-D614                      | 0.83       |
| 40 | California  | PG15 | 12    | RG1,RG3,RG5     | 5 S13-W152-L452-D614-T732                 | 0.62       |
| 41 | California  | PG16 | 14    | RG2,RG3,RG4     | 5 L141-V382-T478-D614-P681                | 0.78       |
| 42 | Colorado    | PG1  | 1368  | RG4             | 1 D614                                    | 1.00       |
| 43 | Colorado    | PG3  | 42    | RG1,RG4         | 7 L5-S359-D614-A871-A1078-G1167-M1237     | 0.67       |
| 44 | Colorado    | PG4  | 35    | RG2,RG4         | 3 Q173-D614-N1023                         | 0.75       |
| 45 | Colorado    | PG5  | 158   | RG4,RG5         | 2 D614-T732                               | 1.00       |
| 46 | Colorado    | PG6  | 95    | RG3,RG4         | 3 T478-D614-P681                          | 0.76       |
| 47 | Colorado    | PG7  | 21    | RG1,RG4         | 7 L5-S359-D614-A871-A1078-G1167-M1237     | 0.58       |
| 48 | Colorado    | PG8  | 85    | RG1,RG4         | 7 L5-S359-D614-A871-A1078-G1167-M1237     | 0.58       |
| 49 | Colorado    | PG9  | 42    | RG1,RG4         | 7 L5-S359-D614-A871-A1078-G1167-M1237     | 0.66       |
| 50 | Colorado    | PG11 | 60    | RG3,RG4,RG5     | 4 T478-D614-P681-T732                     | 0.98       |
| 51 | Colorado    | PG12 | 51    | RG2,RG4         | 3 Q173-D614-N1023                         | 1.00       |
| 52 | Connecticut | PG1  | 1147  | RG3             | 1 D614                                    | 1.00       |
| 53 | Connecticut | PG3  | 7     | RG1,RG3         | 5 T29-T572-D614-Q677-D936                 | 0.88       |
| 54 | Connecticut | PG4  | 188   | RG2,RG3         | 2 N501-D614                               | 1.00       |
| 55 | Connecticut | PG5  | 59    | RG1,RG3         | 5 T29-T572-D614-Q677-D936                 | 1.00       |
| 56 | Connecticut | PG6  | 65    | RG3,RG4         | 2 D614-P681                               | 1.00       |

|     |             |      |      |             |   |                              |      |
|-----|-------------|------|------|-------------|---|------------------------------|------|
| 57  | Connecticut | PG7  | 13   | RG1,RG3     | 5 | T29-T572-D614-Q677-D936      | 0.88 |
| 58  | Connecticut | PG8  | 6    | RG1,RG3,RG5 | 6 | T29-T572-D614-Q677-T732-D936 | 0.72 |
| 59  | Connecticut | PG9  | 34   | RG1,RG3     | 5 | T29-T572-D614-Q677-D936      | 0.63 |
| 60  | Connecticut | PG10 | 4    | RG1,RG2,RG3 | 6 | T29-N501-T572-D614-Q677-D936 | 0.56 |
| 61  | Connecticut | PG11 | 18   | RG3,RG4,RG5 | 3 | D614-P681-T732               | 1.00 |
| 62  | Connecticut | PG12 | 10   | RG2,RG3,RG4 | 3 | N501-D614-P681               | 1.00 |
| 63  | DC          | PG2  | 10   | V1264       | 1 | V1264                        | 1.00 |
| 64  | DC          | PG3  | 1    | D1168       | 1 | D1168                        | 1.00 |
| 65  | DC          | PG4  | 14   | E484        | 1 | E484                         | 1.00 |
| 66  | DC          | PG5  | 20   | D1168,V1264 | 2 | D1168-V1264                  | 1.00 |
| 67  | DC          | PG6  | 1    | D1168,V1264 | 2 | D1168-V1264                  | 1.00 |
| 68  | DC          | PG7  | 1    | D1168,V1264 | 2 | D1168-V1264                  | 1.00 |
| 69  | DC          | PG8  | 1    | D1168,V1264 | 2 | D1168-V1264                  | 1.00 |
| 70  | Delaware    | PG1  | 703  | D614        | 1 | D614                         | 1.00 |
| 71  | Delaware    | PG3  | 36   | D614,Q677   | 2 | D614-Q677                    | 1.00 |
| 72  | Delaware    | PG4  | 1    | D614,Q677   | 2 | D614-Q677                    | 1.00 |
| 73  | Florida     | PG2  | 5941 | RG2         | 1 | D614                         | 1.00 |
| 74  | Florida     | PG3  | 59   | RG1,RG2     | 2 | F220-D614                    | 1.00 |
| 75  | Florida     | PG4  | 515  | RG2,RG3     | 2 | D614-Q677                    | 1.00 |
| 76  | Florida     | PG5  | 47   | RG2,RG5     | 2 | D614-V1164                   | 1.00 |
| 77  | Florida     | PG6  | 364  | RG2,RG4     | 2 | D614-P681                    | 1.00 |
| 78  | Florida     | PG7  | 1    | RG2,RG3,RG4 | 3 | D614-Q677-P681               | 1.00 |
| 79  | Florida     | PG8  | 1    | RG2,RG4     | 2 | D614-P681                    | 1.00 |
| 80  | Florida     | PG9  | 1    | RG2,RG4     | 2 | D614-P681                    | 1.00 |
| 81  | Florida     | PG10 | 1    | RG2,RG4     | 2 | D614-P681                    | 1.00 |
| 82  | Florida     | PG11 | 1    | RG2,RG4     | 2 | D614-P681                    | 1.00 |
| 83  | Florida     | PG12 | 1    | RG2,RG4     | 2 | D614-P681                    | 1.00 |
| 84  | Georgia     | PG2  | 2413 | D614        | 1 | D614                         | 1.00 |
| 85  | Georgia     | PG3  | 104  | D138,D614   | 2 | D138-D614                    | 1.00 |
| 86  | Georgia     | PG4  | 11   | A263,D614   | 2 | A263-D614                    | 1.00 |
| 87  | Georgia     | PG5  | 1    | A263,D614   | 2 | A263-D614                    | 1.00 |
| 88  | Georgia     | PG6  | 1    | A263,D614   | 2 | A263-D614                    | 1.00 |
| 89  | Georgia     | PG7  | 1    | A263,D614   | 2 | A263-D614                    | 1.00 |
| 90  | Georgia     | PG8  | 1    | A263,D614   | 2 | A263-D614                    | 1.00 |
| 91  | Hawaii      | PG1  | 235  | D614        | 1 | D614                         | 1.00 |
| 92  | Hawaii      | PG3  | 724  | D614,P681   | 2 | D614-P681                    | 1.00 |
| 93  | Hawaii      | PG4  | 6    | D614,Q677   | 2 | D614-Q677                    | 1.00 |
| 94  | Hawaii      | PG5  | 1    | D614,Q677   | 2 | D614-Q677                    | 1.00 |
| 95  | Hawaii      | PG6  | 1    | D614,Q677   | 2 | D614-Q677                    | 1.00 |
| 96  | Hawaii      | PG7  | 1    | D614,Q677   | 2 | D614-Q677                    | 1.00 |
| 97  | Hawaii      | PG8  | 1    | D614,Q677   | 2 | D614-Q677                    | 1.00 |
| 98  | Illinois    | PG2  | 2643 | RG2         | 1 | D614                         | 1.00 |
| 99  | Illinois    | PG3  | 17   | RG1,RG2     | 2 | Q173-D614                    | 1.00 |
| 100 | Illinois    | PG4  | 165  | RG2,RG3     | 2 | D614-Q677                    | 1.00 |
| 101 | Illinois    | PG5  | 28   | RG2,RG5     | 2 | D614-T732                    | 1.00 |
| 102 | Illinois    | PG6  | 63   | RG2,RG4     | 2 | D614-P681                    | 1.00 |
| 103 | Illinois    | PG7  | 60   | RG2,RG4,RG5 | 3 | D614-P681-T732               | 1.00 |
| 104 | Illinois    | PG8  | 1    | RG2,RG3,RG5 | 3 | D614-Q677-T732               | 1.00 |
| 105 | Illinois    | PG9  | 1    | RG2,RG3,RG4 | 3 | D614-Q677-P681               | 1.00 |
| 106 | Illinois    | PG10 | 1    | RG2,RG3,RG5 | 3 | D614-Q677-T732               | 1.00 |
| 107 | Illinois    | PG11 | 1    | RG2,RG3,RG5 | 3 | D614-Q677-T732               | 1.00 |
| 108 | Illinois    | PG12 | 1    | RG2,RG3,RG5 | 3 | D614-Q677-T732               | 1.00 |
| 109 | Illinois    | PG13 | 1    | RG2,RG3,RG5 | 3 | D614-Q677-T732               | 1.00 |
| 110 | Illinois    | PG14 | 1    | RG2,RG3,RG5 | 3 | D614-Q677-T732               | 1.00 |
| 111 | Illinois    | PG15 | 1    | RG2,RG3,RG5 | 3 | D614-Q677-T732               | 1.00 |
| 112 | Illinois    | PG16 | 1    | RG2,RG3,RG4 | 3 | D614-Q677-P681               | 1.00 |
| 113 | Indiana     | PG1  | 998  | RG2         | 1 | D614                         | 1.00 |
| 114 | Indiana     | PG3  | 111  | RG2,RG3     | 2 | D614-Q677                    | 1.00 |
| 115 | Indiana     | PG4  | 52   | RG1,RG2,RG4 | 3 | T478-D614-T732               | 1.00 |

|     |               |      |      |             |   |                               |      |
|-----|---------------|------|------|-------------|---|-------------------------------|------|
| 116 | Indiana       | PG5  | 2    | RG2,RG3,RG4 | 3 | D614-Q677-T732                | 1.00 |
| 117 | Indiana       | PG6  | 5    | RG2,RG4     | 2 | D614-T732                     | 1.00 |
| 118 | Indiana       | PG7  | 5    | RG1,RG2     | 2 | T478-D614                     | 1.00 |
| 119 | Indiana       | PG8  | 1    | RG1,RG2     | 2 | T478-D614                     | 1.00 |
| 120 | Indiana       | PG9  | 1    | RG1,RG2     | 2 | T478-D614                     | 1.00 |
| 121 | Indiana       | PG10 | 1    | RG1,RG2     | 2 | T478-D614                     | 1.00 |
| 122 | Indiana       | PG11 | 1    | RG1,RG2     | 2 | T478-D614                     | 1.00 |
| 123 | Indiana       | PG12 | 1    | RG1,RG2     | 2 | T478-D614                     | 1.00 |
| 124 | Iowa          | PG1  | 288  | D614        | 1 | D614                          | 1.00 |
| 125 | Iowa          | PG2  | 1    | D614        | 1 | D614                          | 1.00 |
| 126 | Kansas        | PG1  | 806  | D614        | 1 | D614                          | 1.00 |
| 127 | Kansas        | PG3  | 43   | D614,P681   | 2 | D614-P681                     | 1.00 |
| 128 | Kansas        | PG4  | 7    | D614,E780   | 2 | D614-E780                     | 1.00 |
| 129 | Kansas        | PG5  | 1    | D614,E780   | 2 | D614-E780                     | 1.00 |
| 130 | Kansas        | PG6  | 1    | D614,E780   | 2 | D614-E780                     | 1.00 |
| 131 | Kansas        | PG7  | 1    | D614,E780   | 2 | D614-E780                     | 1.00 |
| 132 | Kansas        | PG8  | 1    | D614,E780   | 2 | D614-E780                     | 1.00 |
| 133 | Kentucky      | PG1  | 548  | D614        | 1 | D614                          | 1.00 |
| 134 | Kentucky      | PG3  | 28   | G257,D614   | 2 | G257-D614                     | 1.00 |
| 135 | Kentucky      | PG4  | 1    | G257,D614   | 2 | G257-D614                     | 1.00 |
| 136 | Louisiana     | PG1  | 2843 | RG3         | 1 | D614                          | 1.00 |
| 137 | Louisiana     | PG2  | 35   | RG2,RG3     | 2 | T572-D614                     | 1.00 |
| 138 | Louisiana     | PG4  | 2    | RG1,RG3     | 4 | T478-D614-P681-T732           | 0.67 |
| 139 | Louisiana     | PG5  | 64   | RG3,RG5     | 2 | D614-N1187                    | 1.00 |
| 140 | Louisiana     | PG6  | 363  | RG3,RG4     | 2 | D614-Q677                     | 1.00 |
| 141 | Louisiana     | PG7  | 34   | RG1,RG3     | 4 | T478-D614-P681-T732           | 0.67 |
| 142 | Louisiana     | PG8  | 3    | RG1,RG3     | 4 | T478-D614-P681-T732           | 0.67 |
| 143 | Louisiana     | PG9  | 98   | RG1,RG3     | 4 | T478-D614-P681-T732           | 1.00 |
| 144 | Louisiana     | PG10 | 18   | RG1,RG3     | 4 | T478-D614-P681-T732           | 0.83 |
| 145 | Louisiana     | PG11 | 3    | RG1,RG3     | 4 | T478-D614-P681-T732           | 0.83 |
| 146 | Louisiana     | PG12 | 1    | RG1,RG3,RG4 | 5 | T478-D614-Q677-P681-T732      | 1.00 |
| 147 | Maine         | PG1  | 1472 | RG4         | 1 | D614                          | 1.00 |
| 148 | Maine         | PG3  | 39   | RG1,RG4     | 2 | G72-D614                      | 1.00 |
| 149 | Maine         | PG4  | 27   | RG3,RG4     | 2 | A520-D614                     | 1.00 |
| 150 | Maine         | PG5  | 17   | RG2,RG4     | 2 | E484-D614                     | 1.00 |
| 151 | Maine         | PG6  | 1    | RG2,RG4     | 2 | E484-D614                     | 1.00 |
| 152 | Maine         | PG7  | 1    | RG2,RG4     | 2 | E484-D614                     | 1.00 |
| 153 | Maine         | PG8  | 1    | RG2,RG4     | 2 | E484-D614                     | 1.00 |
| 154 | Maine         | PG9  | 1    | RG2,RG4     | 2 | E484-D614                     | 1.00 |
| 155 | Maine         | PG10 | 1    | RG2,RG4     | 2 | E484-D614                     | 1.00 |
| 156 | Maine         | PG11 | 1    | RG2,RG4     | 2 | E484-D614                     | 1.00 |
| 157 | Maine         | PG12 | 1    | RG2,RG4     | 2 | E484-D614                     | 1.00 |
| 158 | Maryland      | PG2  | 384  | RG5         | 1 | P681                          | 1.00 |
| 159 | Maryland      | PG3  | 24   | RG2,RG3     | 6 | W152-S155-F157-L452-T859-D950 | 0.57 |
| 160 | Maryland      | PG4  | 76   | RG4,RG5     | 2 | E484-P681                     | 1.00 |
| 161 | Maryland      | PG5  | 54   | RG2,RG4     | 2 | W152-E484                     | 1.00 |
| 162 | Maryland      | PG6  | 8    | RG1,RG4,RG5 | 3 | D80-E484-P681                 | 0.50 |
| 163 | Maryland      | PG9  | 29   | RG4         | 1 | E484                          | 1.00 |
| 164 | Maryland      | PG10 | 35   | RG3         | 5 | S155-F157-L452-T859-D950      | 1.00 |
| 165 | Maryland      | PG11 | 5    | RG1,RG3     | 6 | D80-S155-F157-L452-T859-D950  | 0.76 |
| 166 | Maryland      | PG12 | 29   | RG1,RG3     | 6 | D80-S155-F157-L452-T859-D950  | 0.92 |
| 167 | Massachusetts | PG2  | 3455 | RG3         | 1 | D614                          | 1.00 |
| 168 | Massachusetts | PG3  | 71   | RG1,RG3     | 5 | Q173-D614-A845-K1073-V1133    | 0.63 |
| 169 | Massachusetts | PG4  | 379  | RG2,RG3     | 2 | N501-D614                     | 1.00 |
| 170 | Massachusetts | PG5  | 137  | RG3,RG5     | 2 | D614-P681                     | 1.00 |
| 171 | Massachusetts | PG6  | 32   | RG1,RG3     | 5 | Q173-D614-A845-K1073-V1133    | 0.63 |
| 172 | Massachusetts | PG7  | 21   | RG1,RG3     | 5 | Q173-D614-A845-K1073-V1133    | 0.63 |
| 173 | Massachusetts | PG8  | 239  | RG3,RG4     | 3 | D614-Q677-T732                | 0.75 |
| 174 | Massachusetts | PG9  | 147  | RG3,RG4     | 3 | D614-Q677-T732                | 1.00 |



|     |               |      |      |               |   |                                   |      |
|-----|---------------|------|------|---------------|---|-----------------------------------|------|
| 175 | Massachusetts | PG10 | 45   | RG1, RG2, RG3 | 6 | Q173-N501-D614-A845-K1073-V1133   | 0.72 |
| 176 | Massachusetts | PG11 | 57   | RG3, RG4, RG5 | 4 | D614-Q677-P681-T732               | 0.80 |
| 177 | Massachusetts | PG12 | 12   | RG2, RG3, RG5 | 3 | N501-D614-P681                    | 1.00 |
| 178 | Michigan      | PG1  | 6941 | RG4           | 1 | D614                              | 1.00 |
| 179 | Michigan      | PG3  | 21   | RG2, RG4      | 4 | T95-F486-N501-D614                | 0.67 |
| 180 | Michigan      | PG4  | 27   | RG1, RG4      | 3 | A27-D614-G1085                    | 0.75 |
| 181 | Michigan      | PG5  | 4    | RG3, RG4      | 4 | G142-E180-D614-S940               | 0.67 |
| 182 | Michigan      | PG6  | 19   | RG3, RG4      | 4 | G142-E180-D614-S940               | 0.67 |
| 183 | Michigan      | PG7  | 275  | RG4, RG5      | 2 | D614-Q677                         | 1.00 |
| 184 | Michigan      | PG8  | 134  | RG1, RG4      | 3 | A27-D614-G1085                    | 1.00 |
| 185 | Michigan      | PG9  | 4    | RG2, RG4      | 4 | T95-F486-N501-D614                | 0.96 |
| 186 | Michigan      | PG10 | 53   | RG2, RG3, RG4 | 7 | T95-G142-E180-F486-N501-D614-S940 | 0.67 |
| 187 | Michigan      | PG11 | 35   | RG2, RG4      | 4 | T95-F486-N501-D614                | 0.67 |
| 188 | Michigan      | PG12 | 348  | RG3, RG4, RG5 | 5 | G142-E180-D614-Q677-S940          | 1.00 |
| 189 | Michigan      | PG13 | 4    | RG3, RG4, RG5 | 5 | G142-E180-D614-Q677-S940          | 0.86 |
| 190 | Michigan      | PG14 | 27   | RG3, RG4, RG5 | 5 | G142-E180-D614-Q677-S940          | 0.86 |
| 191 | Michigan      | PG15 | 2    | RG3, RG4, RG5 | 5 | G142-E180-D614-Q677-S940          | 0.61 |
| 192 | Michigan      | PG16 | 3    | RG3, RG4, RG5 | 5 | G142-E180-D614-Q677-S940          | 0.78 |
| 193 | Minnesota     | PG1  | 2385 | RG3           | 1 | D614                              | 1.00 |
| 194 | Minnesota     | PG3  | 4    | RG3, RG5      | 3 | D614-E780-T859                    | 0.75 |
| 195 | Minnesota     | PG4  | 18   | RG2, RG3      | 5 | A222-S494-D614-P681-V1040         | 0.63 |
| 196 | Minnesota     | PG5  | 130  | RG1, RG3      | 2 | L5-D614                           | 1.00 |
| 197 | Minnesota     | PG6  | 49   | RG3, RG5      | 3 | D614-E780-T859                    | 0.75 |
| 198 | Minnesota     | PG7  | 1    | RG1           | 1 | L5                                | 1.00 |
| 199 | Minnesota     | PG8  | 194  | RG3, RG4      | 2 | D614-Q677                         | 1.00 |
| 200 | Minnesota     | PG9  | 97   | RG2, RG3      | 5 | A222-S494-D614-P681-V1040         | 0.63 |
| 201 | Minnesota     | PG10 | 14   | RG2, RG3      | 5 | A222-S494-D614-P681-V1040         | 0.63 |
| 202 | Minnesota     | PG11 | 57   | RG2, RG3      | 5 | A222-S494-D614-P681-V1040         | 0.63 |
| 203 | Minnesota     | PG12 | 58   | RG3, RG5      | 3 | D614-E780-T859                    | 1.00 |
| 204 | Minnesota     | PG13 | 28   | RG1, RG3, RG4 | 3 | L5-D614-Q677                      | 1.00 |
| 205 | Minnesota     | PG14 | 6    | RG2, RG3      | 5 | A222-S494-D614-P681-V1040         | 0.75 |
| 206 | Minnesota     | PG15 | 1    | RG1, RG3, RG5 | 4 | L5-D614-E780-T859                 | 0.83 |
| 207 | Minnesota     | PG16 | 1    | RG1, RG2, RG3 | 6 | L5-A222-S494-D614-P681-V1040      | 0.75 |
| 208 | Mississippi   | PG1  | 331  | D614          | 1 | D614                              | 1.00 |
| 209 | Mississippi   | PG3  | 14   | L5, D614      | 2 | L5-D614                           | 1.00 |
| 210 | Mississippi   | PG4  | 9    | D614, P681    | 2 | D614-P681                         | 1.00 |
| 211 | Mississippi   | PG5  | 1    | D614, P681    | 2 | D614-P681                         | 1.00 |
| 212 | Mississippi   | PG6  | 1    | D614, P681    | 2 | D614-P681                         | 1.00 |
| 213 | Mississippi   | PG7  | 1    | D614, P681    | 2 | D614-P681                         | 1.00 |
| 214 | Mississippi   | PG8  | 1    | D614, P681    | 2 | D614-P681                         | 1.00 |
| 215 | Missouri      | PG1  | 700  | D614          | 1 | D614                              | 1.00 |
| 216 | Montana       | PG2  | 207  | D614          | 1 | D614                              | 1.00 |
| 217 | Nebraska      | PG2  | 24   | D614, N856    | 2 | D614-N856                         | 1.00 |
| 218 | Nebraska      | PG3  | 443  | D614          | 1 | D614                              | 1.00 |
| 219 | Nebraska      | PG4  | 1    | D614          | 1 | D614                              | 1.00 |
| 220 | Nevada        | PG2  | 1279 | RG4           | 1 | D614                              | 1.00 |
| 221 | Nevada        | PG3  | 48   | RG2, RG4      | 4 | H49-D614-Q675-K1073               | 0.67 |
| 222 | Nevada        | PG4  | 98   | RG4, RG5      | 2 | D614-Q677                         | 1.00 |
| 223 | Nevada        | PG5  | 41   | RG2, RG4      | 4 | H49-D614-Q675-K1073               | 0.67 |
| 224 | Nevada        | PG6  | 16   | RG2, RG4      | 4 | H49-D614-Q675-K1073               | 0.67 |
| 225 | Nevada        | PG7  | 37   | RG3, RG4      | 4 | T478-D614-P681-T732               | 0.67 |
| 226 | Nevada        | PG8  | 52   | RG1, RG4      | 4 | S13-W152-L452-D614                | 1.00 |
| 227 | Nevada        | PG9  | 10   | RG1, RG4      | 4 | S13-W152-L452-D614                | 0.77 |
| 228 | Nevada        | PG10 | 10   | RG1, RG4      | 4 | S13-W152-L452-D614                | 0.75 |
| 229 | Nevada        | PG11 | 28   | RG3, RG4, RG5 | 5 | T478-D614-Q677-P681-T732          | 0.52 |
| 230 | Nevada        | PG12 | 40   | RG3, RG4      | 4 | T478-D614-P681-T732               | 0.98 |
| 231 | New Hampshire | PG1  | 450  | D614          | 1 | D614                              | 1.00 |
| 232 | New Jersey    | PG1  | 1007 | RG4           | 1 | D614                              | 1.00 |
| 233 | New Jersey    | PG3  | 2    | RG1, RG4      | 3 | F157-D614-T859                    | 0.75 |

|     |                |      |       |                 |   |                                           |      |
|-----|----------------|------|-------|-----------------|---|-------------------------------------------|------|
| 234 | New Jersey     | PG4  | 15    | RG4,RG5         | 2 | D614-N679                                 | 1.00 |
| 235 | New Jersey     | PG5  | 12    | RG2,RG4         | 2 | L452-D614                                 | 1.00 |
| 236 | New Jersey     | PG6  | 8     | RG1,RG2,RG4     | 4 | F157-L452-D614-T859                       | 0.83 |
| 237 | New Jersey     | PG7  | 27    | RG3,RG4         | 2 | T478-D614                                 | 1.00 |
| 238 | New Jersey     | PG8  | 3     | RG1,RG4         | 3 | F157-D614-T859                            | 0.75 |
| 239 | New Jersey     | PG9  | 9     | RG1,RG2,RG4     | 4 | F157-L452-D614-T859                       | 1.00 |
| 240 | New Jersey     | PG10 | 1     | RG1,RG2,RG4     | 4 | F157-L452-D614-T859                       | 1.00 |
| 241 | New Jersey     | PG11 | 1     | RG1,RG2,RG4     | 4 | F157-L452-D614-T859                       | 1.00 |
| 242 | New Jersey     | PG12 | 1     | RG1,RG2,RG4     | 4 | F157-L452-D614-T859                       | 1.00 |
| 243 | New Mexico     | PG1  | 2099  | RG2             | 1 | D614                                      | 1.00 |
| 244 | New Mexico     | PG3  | 53    | RG2,RG5         | 2 | D614-T732                                 | 1.00 |
| 245 | New Mexico     | PG4  | 25    | RG1,RG2         | 5 | E180-G181-T478-D614-A701                  | 0.63 |
| 246 | New Mexico     | PG5  | 27    | RG1,RG2         | 5 | E180-G181-T478-D614-A701                  | 0.63 |
| 247 | New Mexico     | PG6  | 114   | RG2,RG4         | 2 | D614-P681                                 | 1.00 |
| 248 | New Mexico     | PG7  | 13    | RG1,RG2         | 5 | E180-G181-T478-D614-A701                  | 0.63 |
| 249 | New Mexico     | PG8  | 55    | RG2,RG3,RG5     | 3 | D614-Q677-T732                            | 1.00 |
| 250 | New Mexico     | PG9  | 276   | RG2,RG3         | 2 | D614-Q677                                 | 1.00 |
| 251 | New Mexico     | PG11 | 28    | RG1,RG2,RG4,RG5 | 7 | E180-G181-T478-D614-P681-A701-T732        | 0.81 |
| 252 | New Mexico     | PG12 | 3     | RG1,RG2,RG3     | 6 | E180-G181-T478-D614-Q677-A701             | 0.75 |
| 253 | New York       | PG1  | 10822 | RG4             | 1 | D614                                      | 1.00 |
| 254 | New York       | PG3  | 284   | RG1,RG4         | 8 | L5-L54-E132-Y453-T478-E484-D614-T732      | 0.55 |
| 255 | New York       | PG5  | 82    | RG1,RG4         | 8 | L5-L54-E132-Y453-T478-E484-D614-T732      | 0.58 |
| 256 | New York       | PG6  | 132   | RG2,RG4,RG5     | 7 | D80-F157-L452-D614-P681-T859-D950         | 0.68 |
| 257 | New York       | PG7  | 1161  | RG4,RG5         | 2 | D614-P681                                 | 1.00 |
| 258 | New York       | PG8  | 141   | RG2,RG4         | 6 | D80-F157-L452-D614-T859-D950              | 0.61 |
| 259 | New York       | PG9  | 226   | RG1,RG4         | 8 | L5-L54-E132-Y453-T478-E484-D614-T732      | 0.59 |
| 260 | New York       | PG10 | 59    | RG1,RG4         | 8 | L5-L54-E132-Y453-T478-E484-D614-T732      | 0.57 |
| 261 | New York       | PG11 | 360   | RG3,RG4,RG5     | 4 | S494-D614-P681-T716                       | 1.00 |
| 262 | New York       | PG12 | 102   | RG3,RG4,RG5     | 4 | S494-D614-P681-T716                       | 0.67 |
| 263 | New York       | PG13 | 470   | RG2,RG4         | 6 | D80-F157-L452-D614-T859-D950              | 1.00 |
| 264 | New York       | PG14 | 172   | RG1,RG4,RG5     | 9 | L5-L54-E132-Y453-T478-E484-D614-P681-T732 | 0.76 |
| 265 | New York       | PG15 | 52    | RG3,RG4,RG5     | 4 | S494-D614-P681-T716                       | 0.74 |
| 266 | New York       | PG16 | 26    | RG2,RG4         | 6 | D80-F157-L452-D614-T859-D950              | 0.83 |
| 267 | North Carolina | PG1  | 2450  | RG4             | 1 | D614                                      | 1.00 |
| 268 | North Carolina | PG3  | 11    | RG2,RG4         | 3 | D138-E554-D614                            | 1.00 |
| 269 | North Carolina | PG4  | 2     | RG2,RG4         | 3 | D138-E554-D614                            | 0.75 |
| 270 | North Carolina | PG5  | 233   | RG4,RG5         | 2 | D614-P681                                 | 1.00 |
| 271 | North Carolina | PG6  | 39    | RG1,RG4         | 2 | A67-D614                                  | 1.00 |
| 272 | North Carolina | PG7  | 13    | RG2,RG4         | 3 | D138-E554-D614                            | 0.75 |
| 273 | North Carolina | PG8  | 3     | RG5             | 1 | P681                                      | 1.00 |
| 274 | North Carolina | PG9  | 5     | RG1,RG4,RG5     | 3 | A67-D614-P681                             | 1.00 |
| 275 | North Carolina | PG10 | 13    | RG3,RG4         | 2 | K444-D614                                 | 1.00 |
| 276 | North Carolina | PG11 | 1     | RG3,RG4         | 2 | K444-D614                                 | 1.00 |
| 277 | North Carolina | PG12 | 1     | RG3,RG4         | 2 | K444-D614                                 | 1.00 |
| 278 | North Dakota   | PG1  | 344   | D614            | 1 | D614                                      | 1.00 |
| 279 | Ohio           | PG1  | 1286  | RG3             | 1 | D614                                      | 1.00 |
| 280 | Ohio           | PG3  | 3     | RG3,RG5         | 2 | D614-T732                                 | 1.00 |
| 281 | Ohio           | PG4  | 35    | RG3,RG4         | 2 | D614-P681                                 | 1.00 |
| 282 | Ohio           | PG5  | 40    | RG2,RG3,RG4,RG5 | 4 | T478-D614-P681-T732                       | 1.00 |
| 283 | Ohio           | PG6  | 6     | RG1,RG3         | 4 | D80-L452-D614-T859                        | 0.69 |
| 284 | Ohio           | PG7  | 6     | RG1,RG3         | 4 | D80-L452-D614-T859                        | 0.67 |
| 285 | Ohio           | PG8  | 8     | RG2,RG3,RG4     | 3 | T478-D614-P681                            | 0.96 |
| 286 | Ohio           | PG9  | 2     | RG1,RG3,RG4     | 5 | D80-L452-D614-P681-T859                   | 0.78 |
| 287 | Ohio           | PG10 | 3     | RG1,RG3         | 4 | D80-L452-D614-T859                        | 0.67 |
| 288 | Ohio           | PG11 | 4     | RG3,RG4,RG5     | 3 | D614-P681-T732                            | 1.00 |
| 289 | Ohio           | PG12 | 8     | RG1,RG3         | 4 | D80-L452-D614-T859                        | 1.00 |
| 290 | Oklahoma       | PG2  | 365   | D614            | 1 | D614                                      | 1.00 |
| 291 | Oregon         | PG2  | 2807  | RG4             | 1 | D614                                      | 1.00 |
| 292 | Oregon         | PG3  | 49    | RG3,RG4         | 3 | T478-D614-T732                            | 0.75 |

|     |                |      |       |             |   |                                          |      |
|-----|----------------|------|-------|-------------|---|------------------------------------------|------|
| 293 | Oregon         | PG4  | 154   | RG2,RG4     | 2 | D178-D614                                | 1.00 |
| 294 | Oregon         | PG5  | 27    | RG1,RG4     | 7 | S13-Q52-Q173-L452-D614-Q675-S939         | 0.58 |
| 295 | Oregon         | PG6  | 10    | RG1,RG4     | 7 | S13-Q52-Q173-L452-D614-Q675-S939         | 0.62 |
| 296 | Oregon         | PG7  | 17    | RG1,RG4     | 7 | S13-Q52-Q173-L452-D614-Q675-S939         | 0.58 |
| 297 | Oregon         | PG8  | 19    | RG1,RG4     | 7 | S13-Q52-Q173-L452-D614-Q675-S939         | 0.59 |
| 298 | Oregon         | PG9  | 59    | RG4,RG5     | 2 | D614-K1191                               | 1.00 |
| 299 | Oregon         | PG10 | 27    | RG3,RG4     | 3 | T478-D614-T732                           | 1.00 |
| 300 | Oregon         | PG11 | 18    | RG1,RG4     | 7 | S13-Q52-Q173-L452-D614-Q675-S939         | 0.62 |
| 301 | Oregon         | PG12 | 6     | RG3,RG4     | 3 | T478-D614-T732                           | 0.75 |
| 302 | Pennsylvania   | PG1  | 1768  | RG2         | 1 | D614                                     | 1.00 |
| 303 | Pennsylvania   | PG3  | 177   | RG2,RG3     | 2 | D614-Q677                                | 1.00 |
| 304 | Pennsylvania   | PG4  | 15    | RG1,RG2     | 2 | Q173-D614                                | 1.00 |
| 305 | Pennsylvania   | PG5  | 376   | RG2,RG5     | 2 | D614-P681                                | 1.00 |
| 306 | Pennsylvania   | PG6  | 7     | RG2,RG4     | 2 | D614-N679                                | 1.00 |
| 307 | Pennsylvania   | PG7  | 1     | RG2,RG4     | 2 | D614-N679                                | 1.00 |
| 308 | Pennsylvania   | PG8  | 1     | RG2,RG4     | 2 | D614-N679                                | 1.00 |
| 309 | Pennsylvania   | PG9  | 1     | RG2,RG4     | 2 | D614-N679                                | 1.00 |
| 310 | Pennsylvania   | PG10 | 1     | RG2,RG4     | 2 | D614-N679                                | 1.00 |
| 311 | Pennsylvania   | PG11 | 1     | RG2,RG4     | 2 | D614-N679                                | 1.00 |
| 312 | Pennsylvania   | PG12 | 1     | RG2,RG4     | 2 | D614-N679                                | 1.00 |
| 313 | Puerto Rico    | PG2  | 201   | D614        | 1 | D614                                     | 1.00 |
| 314 | Puerto Rico    | PG3  | 73    | T20,D614    | 2 | T20-D614                                 | 1.00 |
| 315 | Puerto Rico    | PG4  | 21    | D253,D614   | 2 | D253-D614                                | 1.00 |
| 316 | Puerto Rico    | PG5  | 1     | D253        | 1 | D253                                     | 1.00 |
| 317 | Puerto Rico    | PG6  | 1     | D253,D614   | 2 | D253-D614                                | 1.00 |
| 318 | Puerto Rico    | PG7  | 1     | D253,D614   | 2 | D253-D614                                | 1.00 |
| 319 | Puerto Rico    | PG8  | 1     | D253,D614   | 2 | D253-D614                                | 1.00 |
| 320 | Rhode Island   | PG1  | 570   | D614        | 1 | D614                                     | 1.00 |
| 321 | South Carolina | PG2  | 782   | D614        | 1 | D614                                     | 1.00 |
| 322 | Tennessee      | PG1  | 456   | D614        | 1 | D614                                     | 1.00 |
| 323 | Texas          | PG1  | 25256 | RG3         | 1 | D614                                     | 1.00 |
| 324 | Texas          | PG3  | 245   | RG1,RG3     | 6 | L54-A520-D614-N641-M731-S943             | 0.60 |
| 325 | Texas          | PG4  | 1255  | RG3,RG4     | 2 | D614-Q677                                | 1.00 |
| 326 | Texas          | PG5  | 222   | RG1,RG3     | 6 | L54-A520-D614-N641-M731-S943             | 0.70 |
| 327 | Texas          | PG6  | 243   | RG1,RG3     | 6 | L54-A520-D614-N641-M731-S943             | 0.60 |
| 328 | Texas          | PG7  | 62    | RG1,RG3     | 6 | L54-A520-D614-N641-M731-S943             | 0.60 |
| 329 | Texas          | PG8  | 275   | RG2,RG3     | 3 | T478-D614-T732                           | 0.75 |
| 330 | Texas          | PG9  | 656   | RG3,RG5     | 2 | D614-P681                                | 1.00 |
| 331 | Texas          | PG10 | 18    | RG1,RG3     | 6 | L54-A520-D614-N641-M731-S943             | 0.60 |
| 332 | Texas          | PG11 | 32    | RG2,RG3     | 3 | T478-D614-T732                           | 0.75 |
| 333 | Texas          | PG12 | 53    | RG2,RG3,RG4 | 4 | T478-D614-Q677-T732                      | 0.83 |
| 334 | Texas          | PG13 | 461   | RG2,RG3,RG5 | 4 | T478-D614-P681-T732                      | 1.00 |
| 335 | Texas          | PG14 | 15    | RG2,RG3,RG5 | 4 | T478-D614-P681-T732                      | 0.83 |
| 336 | Texas          | PG15 | 27    | RG2,RG4,RG5 | 4 | T478-Q677-P681-T732                      | 0.83 |
| 337 | Texas          | PG16 | 76    | RG2         | 2 | T478-T732                                | 0.50 |
| 338 | Utah           | PG2  | 5061  | RG4         | 1 | D614                                     | 1.00 |
| 339 | Utah           | PG3  | 785   | RG3,RG4     | 2 | D253-D614                                | 1.00 |
| 340 | Utah           | PG5  | 63    | RG2,RG4     | 3 | T22-D614-S698                            | 0.99 |
| 341 | Utah           | PG6  | 14    | RG1,RG4     | 7 | S13-D138-T478-D614-T732-E1144-N1187      | 0.58 |
| 342 | Utah           | PG7  | 148   | RG4,RG5     | 2 | D614-P681                                | 1.00 |
| 343 | Utah           | PG8  | 26    | RG1,RG3,RG4 | 8 | S13-D138-D253-T478-D614-T732-E1144-N1187 | 0.72 |
| 344 | Utah           | PG9  | 29    | RG1,RG4     | 7 | S13-D138-T478-D614-T732-E1144-N1187      | 0.58 |
| 345 | Utah           | PG10 | 6     | RG2,RG4     | 3 | T22-D614-S698                            | 0.75 |
| 346 | Utah           | PG11 | 68    | RG1,RG4     | 7 | S13-D138-T478-D614-T732-E1144-N1187      | 0.58 |
| 347 | Utah           | PG14 | 1     | RG4         | 1 | D614                                     | 1.00 |
| 348 | Utah           | PG15 | 20    | RG1,RG4,RG5 | 8 | S13-D138-T478-D614-P681-T732-E1144-N1187 | 0.78 |
| 349 | Utah           | PG16 | 8     | RG1,RG4     | 7 | S13-D138-T478-D614-T732-E1144-N1187      | 0.58 |
| 350 | Virginia       | PG2  | 3196  | RG3         | 1 | D614                                     | 1.00 |
| 351 | Virginia       | PG3  | 240   | RG3,RG5     | 2 | D614-P681                                | 1.00 |

|     |            |      |      |             |   |                                   |      |
|-----|------------|------|------|-------------|---|-----------------------------------|------|
| 352 | Virginia   | PG4  | 13   | RG1,RG3     | 3 | A263-D614-A701                    | 0.75 |
| 353 | Virginia   | PG5  | 180  | RG3,RG4     | 2 | D614-Q677                         | 1.00 |
| 354 | Virginia   | PG6  | 82   | RG2,RG3     | 2 | E484-D614                         | 1.00 |
| 355 | Virginia   | PG7  | 78   | RG1,RG3     | 3 | A263-D614-A701                    | 0.75 |
| 356 | Virginia   | PG8  | 53   | RG2,RG3,RG5 | 3 | E484-D614-P681                    | 1.00 |
| 357 | Virginia   | PG9  | 1    | RG2,RG3,RG4 | 3 | E484-D614-Q677                    | 1.00 |
| 358 | Virginia   | PG10 | 1    | RG1,RG3,RG5 | 4 | A263-D614-P681-A701               | 0.83 |
| 359 | Virginia   | PG11 | 1    | RG3,RG4,RG5 | 3 | D614-Q677-P681                    | 1.00 |
| 360 | Virginia   | PG12 | 1    | RG2,RG3,RG5 | 3 | E484-D614-P681                    | 1.00 |
| 361 | Washington | PG2  | 7130 | RG3         | 1 | D614                              | 1.00 |
| 362 | Washington | PG4  | 12   | RG3,RG4,RG5 | 3 | D614-Q677-T732                    | 1.00 |
| 363 | Washington | PG5  | 128  | RG3,RG5     | 2 | D614-T732                         | 1.00 |
| 364 | Washington | PG7  | 208  | RG3,RG4     | 2 | D614-Q677                         | 0.98 |
| 365 | Washington | PG8  | 14   | RG1,RG3     | 7 | S13-W152-L452-V483-N501-D614-A684 | 0.61 |
| 366 | Washington | PG9  | 74   | RG2,RG3     | 2 | D178-D614                         | 1.00 |
| 367 | Washington | PG10 | 10   | RG1,RG3     | 7 | S13-W152-L452-V483-N501-D614-A684 | 0.53 |
| 368 | Washington | PG11 | 56   | RG1,RG3     | 7 | S13-W152-L452-V483-N501-D614-A684 | 0.58 |
| 369 | Washington | PG12 | 24   | RG1,RG3     | 7 | S13-W152-L452-V483-N501-D614-A684 | 0.74 |
| 370 | Wisconsin  | PG1  | 6325 | RG3         | 1 | D614                              | 1.00 |
| 371 | Wisconsin  | PG3  | 631  | RG3,RG4     | 2 | D614-Q677                         | 1.00 |
| 372 | Wisconsin  | PG4  | 55   | RG2,RG3     | 3 | E583-D614-Q675                    | 0.75 |
| 373 | Wisconsin  | PG5  | 82   | RG2,RG3     | 3 | E583-D614-Q675                    | 0.97 |
| 374 | Wisconsin  | PG6  | 25   | RG1,RG3     | 6 | F157-N501-A575-D614-P681-M1229    | 0.60 |
| 375 | Wisconsin  | PG7  | 235  | RG3,RG5     | 2 | D614-E780                         | 1.00 |
| 376 | Wisconsin  | PG8  | 115  | RG1,RG3     | 6 | F157-N501-A575-D614-P681-M1229    | 0.60 |
| 377 | Wisconsin  | PG9  | 56   | RG1,RG3     | 6 | F157-N501-A575-D614-P681-M1229    | 0.61 |
| 378 | Wisconsin  | PG10 | 91   | RG1,RG3     | 6 | F157-N501-A575-D614-P681-M1229    | 0.60 |
| 379 | Wisconsin  | PG11 | 10   | RG1,RG3     | 6 | F157-N501-A575-D614-P681-M1229    | 0.60 |
| 380 | Wisconsin  | PG12 | 3    | RG2         | 2 | E583-Q675                         | 1.00 |
| 381 | Wyoming    | PG2  | 176  | RG2         | 1 | Q173                              | 1.00 |
| 382 | Wyoming    | PG3  | 15   | RG3         | 1 | D215                              | 1.00 |
| 383 | Wyoming    | PG4  | 74   | RG5         | 1 | P681                              | 1.00 |
| 384 | Wyoming    | PG6  | 10   | RG1         | 3 | S13-W152-W258                     | 1.00 |
| 385 | Wyoming    | PG7  | 4    | RG1,RG4     | 4 | S13-W152-W258-L452                | 0.50 |
| 386 | Wyoming    | PG8  | 5    | RG1         | 3 | S13-W152-W258                     | 0.60 |
| 387 | Wyoming    | PG10 | 4    | RG4         | 1 | L452                              | 1.00 |
| 388 | Wyoming    | PG11 | 9    | RG1,RG4     | 4 | S13-W152-W258-L452                | 0.70 |
| 389 | Wyoming    | PG12 | 37   | RG1,RG4     | 4 | S13-W152-W258-L452                | 1.00 |
| 390 | Other      | PG2  | 640  | D614        | 1 | D614                              | 1.00 |

“Other” includes sequences from South Dakota, Vermont, and the Virgin Islands, in addition to sequences for which state information was missing.

**Table S6. List of individuals from the Originating laboratories responsible for obtaining the specimens and the Submitting laboratories where genetic sequence data were generated and shared via the GISAID Initiative, on which this research is based.**

We gratefully acknowledge the following Authors from the Originating laboratories responsible for obtaining the specimens, as well as the Submitting laboratories where the genome data were generated and shared via GISAID, on which this research is based.

All Submitters of data may be contacted directly via [www.gisaid.org](http://www.gisaid.org)

Authors are sorted alphabetically.

| Accession ID                                                                                                                                                                                                                                                                                                                                                                                                                                             | Originating Laboratory                                                                              | Submitting Laboratory                                                                                                                        | Authors                                                                                                                                                                                                                                                                                                                                                                                                                                                                                         |
|----------------------------------------------------------------------------------------------------------------------------------------------------------------------------------------------------------------------------------------------------------------------------------------------------------------------------------------------------------------------------------------------------------------------------------------------------------|-----------------------------------------------------------------------------------------------------|----------------------------------------------------------------------------------------------------------------------------------------------|-------------------------------------------------------------------------------------------------------------------------------------------------------------------------------------------------------------------------------------------------------------------------------------------------------------------------------------------------------------------------------------------------------------------------------------------------------------------------------------------------|
| EPI_ISL_7543837, EPI_ISL_7543885, EPI_ISL_7544121, EPI_ISL_7544319, EPI_ISL_7544331, EPI_ISL_7544369, EPI_ISL_7544456, EPI_ISL_7544613, EPI_ISL_7544642, EPI_ISL_7544715                                                                                                                                                                                                                                                                                 |                                                                                                     |                                                                                                                                              |                                                                                                                                                                                                                                                                                                                                                                                                                                                                                                 |
| see above                                                                                                                                                                                                                                                                                                                                                                                                                                                | 2 Military Hospital w/c MAA                                                                         | NHLS/UCT                                                                                                                                     | Arash Iranzadeh; Bruna Galvão; Carolyn Williamson; Deedean Doolabh; Diana Hardie; Gert Marais; Innocent Mudau; Luicer Olubayo; Lynn Tyers; Marvin Hsiao; Nokuzola Mbhele; Rageema Joseph; Stephen Korsman                                                                                                                                                                                                                                                                                       |
| EPI_ISL_7621467, EPI_ISL_7621483, EPI_ISL_7621936                                                                                                                                                                                                                                                                                                                                                                                                        | 4Cyté Pathology                                                                                     | NSW Health Pathology - Institute of Clinical Pathology and Medical Research; Westmead Hospital; University of Sydney                         | Arnott A.; Draper J.; Gall M.; Martinez E.; Rockett R.; Sintchenko V.; on behalf of ICPMR                                                                                                                                                                                                                                                                                                                                                                                                       |
| EPI_ISL_7495248, EPI_ISL_7495249, EPI_ISL_7495250                                                                                                                                                                                                                                                                                                                                                                                                        | A. Krumbholz, Labor Dr. Krause und Kollegen MVZ GmbH, Kiel                                          | Charité Universitätsmedizin Berlin, Institut für Virologie                                                                                   | Barbara Mühlemann; Christian Drostens; Julia Schneider; Julia Tesch; Jörn Beheim-Schwarzbach; Talitha Velth; Terry Jones; Tobias Bleicker; Victor M Corman                                                                                                                                                                                                                                                                                                                                      |
| EPI_ISL_7405721                                                                                                                                                                                                                                                                                                                                                                                                                                          | A.S.L. CITTA DI TORINO - OSPEDALE AMEDEO DI SAVOIA                                                  | Fondazione del Piemonte per l'Oncologia IRCCS                                                                                                | Antonino Sottile; Giorgio Giardina; Paola Marino; Silvia Brossa                                                                                                                                                                                                                                                                                                                                                                                                                                 |
| EPI_ISL_7306737                                                                                                                                                                                                                                                                                                                                                                                                                                          | A.S.L. TO4                                                                                          | Fondazione del Piemonte per l'Oncologia IRCCS                                                                                                | Antonino Sottile; Giorgio Giardina; Paola Marino; Silvia Brossa                                                                                                                                                                                                                                                                                                                                                                                                                                 |
| EPI_ISL_7016910, EPI_ISL_7569944, EPI_ISL_7569960, EPI_ISL_7569961, EPI_ISL_7569968, EPI_ISL_7569970, EPI_ISL_7569978, EPI_ISL_7569980, EPI_ISL_7569985, EPI_ISL_7569988                                                                                                                                                                                                                                                                                 | see above                                                                                           | ACT Pathology                                                                                                                                | Schwessinger Lab                                                                                                                                                                                                                                                                                                                                                                                                                                                                                |
| see above                                                                                                                                                                                                                                                                                                                                                                                                                                                | ACT Pathology                                                                                       | Schwessinger Lab                                                                                                                             | Ashley Jones; Austin Bird; Bayantes Dagvadorj; Benjamin Schwessinger; Carl McCombe; Carolina Correa Ospina; Catalina Barragán Quintero; Craig Kennedy; Elise Kellett; Emma Crean; Evie Hodgson; Gabrielle Smith; Karina Kennedy; Rachel Leonard; Rene Riedelbauch; Robyn Hall; Salome Wilson; Scott Ferguson                                                                                                                                                                                    |
| EPI_ISL_6891760, EPI_ISL_7129657, EPI_ISL_7129884, EPI_ISL_7130085, EPI_ISL_7130189, EPI_ISL_7130344, EPI_ISL_7130486                                                                                                                                                                                                                                                                                                                                    | see above                                                                                           | AGES-Institute for medical Microbiology and Hygiene Vienna                                                                                   | Alexander Indra; Elisabeth Polster; Florian Heger; Julia Mikovits; Kathrin Lippert; Marion Blaschitz; Patrick Hyden; Peter Hufnagl; Stefanie Dobrovolsky; Vera Wallner                                                                                                                                                                                                                                                                                                                          |
| EPI_ISL_7381191                                                                                                                                                                                                                                                                                                                                                                                                                                          | AHRI                                                                                                | CERI, Centre for Epidemic Response and Innovation, Stellenbosch University and KRISP, KZN Research Innovation and Sequencing Platform, UKZN, | Arisha Maharaj; Bernstein Mallory; Cele Sandile; Glandhari J; Karim Farina; Khan Khadija; Moir M; Naidoo Y; Pillay S; Ramphal U; Ramphal Y; San JE; Sigal Alex; Tegally H; Tshiabula D; Wilkinson E; de Oliveira T; van Wyk S                                                                                                                                                                                                                                                                   |
| EPI_ISL_7358094                                                                                                                                                                                                                                                                                                                                                                                                                                          | AHRI-Sigal                                                                                          | CERI, Centre for Epidemic Response and Innovation, Stellenbosch University and KRISP, KZN Research Innovation and Sequencing Platform, UKZN, | Bernstein Mallory; Cele Sandile; Glandhari J; Karim Farina; Khan Khadija; Moir M; Naidoo Y; Nokukhanya Mdlaobse; Pillay S; Ramphal U; Ramphal Y; San JE; Sigal Alex; Tegally H; Tshiabula D; Wilkinson E; de Oliveira T                                                                                                                                                                                                                                                                         |
| EPI_ISL_7636072                                                                                                                                                                                                                                                                                                                                                                                                                                          | AZDelta                                                                                             | AZ Delta Medical Laboratories in Roeselare, Belgium                                                                                          | Dieter De Smet; Frederik Van Hoecke; Geert Martens; on behalf of AZ Delta COVID-19 Genomics core (member of Genomic surveillance of SARS-CoV-2 in Belgium network)                                                                                                                                                                                                                                                                                                                              |
| EPI_ISL_7154405                                                                                                                                                                                                                                                                                                                                                                                                                                          | Aegis Sciences Corporation                                                                          | Centers for Disease Control and Prevention Division of Viral Diseases, Pathogen Discovery                                                    | Alec Vest; Benjamin Rambo-Martin; Christopher Gulwick; Clinton Paden; Cyndi Clark; Dakota Howard; Dhvani Batra; Dillon Nall; Duncan MacCannell; Erisa Sula; Ethan Sanders; Holly Houdeshell; Jason Caravas; Kristine Lacey; Matthew Hardison; Matthew Scherer; Ola Kvalvaag; Patrick Campbell; Peter Cook; Rob Case; Scott Sammons; Shatavia Morrison; Shaun Westlund; Tymeckia Kendall; Victoria Caban Figueroa; Vikramsinha Ghorpade; Yvette Unoarumhi                                        |
| EPI_ISL_7452769, EPI_ISL_7452775                                                                                                                                                                                                                                                                                                                                                                                                                         | Aesculabor Hamburg, Institut der Labormedizin                                                       | Heinrich Pette Institute, Leibniz Institute for Experimental Virology                                                                        | Adam Grundhoff; Alexis Robitaille; Johannes Knobloch; Martin Aepfelbacher; Nicole Fischer; Thomas Günther                                                                                                                                                                                                                                                                                                                                                                                       |
| EPI_ISL_7470217, EPI_ISL_7470278, EPI_ISL_7470360, EPI_ISL_7470368, EPI_ISL_7470391, EPI_ISL_7470446                                                                                                                                                                                                                                                                                                                                                     | Akershus University Hospital, Department for Microbiology and Infectious Disease Control            | Norwegian Institute of Public Health, Department of Virology                                                                                 | Atiya R Ali; Debech Nadia; Engebretsen Serina Beate; Garcia Llorente Ignacio; Hilde Elshaug; Hilde Vollan; Jon Bråte; Kamilla Heddeland Instefjord; Karoline Bragstad; Kathrine Stene-Johansen; Line Victoria Moen; Marie Paulsen Madsen; Olav Hungnes; Pedersen Benedikte Nevjen; Rasmus Riis Kopperud                                                                                                                                                                                         |
| EPI_ISL_7620089                                                                                                                                                                                                                                                                                                                                                                                                                                          | Alaska State Virology Laboratory                                                                    | Alaska State Virology Laboratory                                                                                                             | Elva House; Jack Chen; Jacob Zidek; Jeremy Roe; Lisa Smith; Ph.D.                                                                                                                                                                                                                                                                                                                                                                                                                               |
| EPI_ISL_7146436, EPI_ISL_7506705                                                                                                                                                                                                                                                                                                                                                                                                                         | Allergy, Immunology and Cell Biology Unit (ACBU)                                                    | Allergy, Immunology and Cell Biology Unit (ACBU)                                                                                             | Ayesha Wijesinghe; Chandima Jeewandara; Deshni Jayathilaka; Dinuka Ariyaratne; Diyanath Ranasinghe; Dumni Guasinghe; Farha Bary; Gathsaurie Neelika Malavige; Tibutius Thanesh                                                                                                                                                                                                                                                                                                                  |
| EPI_ISL_7544441                                                                                                                                                                                                                                                                                                                                                                                                                                          | Alma CDC w/c AHC                                                                                    | NHLS/UCT                                                                                                                                     | Arash Iranzadeh; Bruna Galvão; Carolyn Williamson; Deedean Doolabh; Diana Hardie; Gert Marais; Innocent Mudau; Luicer Olubayo; Lynn Tyers; Marvin Hsiao; Nokuzola Mbhele; Rageema Joseph; Stephen Korsman                                                                                                                                                                                                                                                                                       |
| EPI_ISL_7264139, EPI_ISL_7265455, EPI_ISL_7265456                                                                                                                                                                                                                                                                                                                                                                                                        | Alpha Labs                                                                                          | National Microbiology Laboratory (NML)                                                                                                       | Anna Majer; Anneliese Landgraff; CanCOGeN's metadata curation team; Darian Hole; Dynacare Brampton COVID-19 Diagnostic team; Elsie Grudeski; Gary Van Domselaar; Gordon Jolly; Grace Seo; Jennifer Tanner; Madison Chapel; Morag Graham; Natalie Knox; Nathalie Bastien; Philip Mabon; Public Health Agency of Canada CanCOGeN team; Rhiannon Huzarewich; Russell Mandes; Shari Tyson; Timothy Booth; Yan Li                                                                                    |
| EPI_ISL_6914011, EPI_ISL_6914012, EPI_ISL_6914013, EPI_ISL_6914014, EPI_ISL_6914015, EPI_ISL_6914016, EPI_ISL_6914017, EPI_ISL_6914018, EPI_ISL_6914019, EPI_ISL_6914020, EPI_ISL_6914021, EPI_ISL_6914022, EPI_ISL_6914023, EPI_ISL_6914024, EPI_ISL_6914025, EPI_ISL_6914026, EPI_ISL_6914027, EPI_ISL_6914028, EPI_ISL_6914029, EPI_ISL_6914030, EPI_ISL_6914031, EPI_ISL_6914032, EPI_ISL_6914033, EPI_ISL_6914034, EPI_ISL_6914035, EPI_ISL_6914036 | see above                                                                                           | Amphath Laboratories                                                                                                                         | National Institute for Communicable Diseases of the National Health Laboratory Service                                                                                                                                                                                                                                                                                                                                                                                                          |
| EPI_ISL_7605587, EPI_ISL_7605639, EPI_ISL_7605640, EPI_ISL_7605743, EPI_ISL_7605745                                                                                                                                                                                                                                                                                                                                                                      | Anglo American                                                                                      | National Institute for Communicable Diseases of the National Health Laboratory Service                                                       | Amoako DG; Bhiman JN; Everatt J; Ismail A; Mahlangu B; Mnguni A; Mohale T; Ntuli N; Scheepers C; Wolter N                                                                                                                                                                                                                                                                                                                                                                                       |
| EPI_ISL_7011321, EPI_ISL_7568602                                                                                                                                                                                                                                                                                                                                                                                                                         | Area of Virology, Serology and Virology Division (SAVID), New South Wales Health Pathology Randwick | Virology Research Laboratory; Area of Virology, Serology and Virology Division (SAVID), New South Wales Health Pathology Randwick            | Au, J.; Bull, R.; Deveson, I.; Foster, C.; Rawlinson, W.; Ruiz Silva, M.; Van Hal, S.                                                                                                                                                                                                                                                                                                                                                                                                           |
| EPI_ISL_7503376, EPI_ISL_7503377, EPI_ISL_7503378, EPI_ISL_7548950, EPI_ISL_7548951, EPI_ISL_7548952                                                                                                                                                                                                                                                                                                                                                     | Arizona State University                                                                            | Arizona State University                                                                                                                     | Efrem S. Lim; Joshua LaBaer; LaRinda A. Holland; Matthew F. Smith; Nathaniel Johnson; Regan A. Sullins; Steven C. Holland; Vel Murugan                                                                                                                                                                                                                                                                                                                                                          |
| EPI_ISL_6963510                                                                                                                                                                                                                                                                                                                                                                                                                                          | Auriga Research Pvt.Ltd / Strand Life Sciences                                                      | National Centre for Biological Sciences, TIFR - Rockefeller Foundation                                                                       | Aarati Karaba; Anson Kunjumon George; Aparnaa Ramanathan; Apurva Sarin; Chandrasekhar Vadlamudi; Chitra Pattabiraman; Darshan Sreenivas; Dasaradhi Palakodeti; Dimple Notani; Divya Priya A; Madhusudhan J; Manisha Bharadwaj; Manoj Kumar Jha; Mudasi Nazaar; Pradeep B P; Priyanka Ananta Mulay; Ramesh Hariharan; Rohan Pais; Satyajit Mayor; Saumitra Mardkar; Srivathsan Adimodam; Uma Ramakrishnan; Vamsi Veeramachaneni; Vasanthapuram Ravi; Vijay Chandru; Vishal G Rao; Yasodha Kannan |
| EPI_ISL_7621950, EPI_ISL_7621951, EPI_ISL_7621953, EPI_ISL_7621957                                                                                                                                                                                                                                                                                                                                                                                       | Australian Clinical Labs (formerly Healthscope Pathology)                                           | NSW Health Pathology - Institute of Clinical Pathology and Medical Research; Westmead Hospital; University of Sydney                         | Arnott A.; Draper J.; Gall M.; Martinez E.; Rockett R.; Sintchenko V.; on behalf of ICPMR                                                                                                                                                                                                                                                                                                                                                                                                       |
| EPI_ISL_7195246, EPI_ISL_7195247, EPI_ISL_7195248                                                                                                                                                                                                                                                                                                                                                                                                        | Austrian Agency for Health and Food Safety (AGES)                                                   | Berghaler laboratory, CeMM Research Center for Molecular Medicine of the Austrian Academy of Sciences                                        | Andreas Berghaler; Anna Schedi; Bekir Erguner; Benedikt Agerer; Christoph Bock; Fabian Amman; Jan Laine; Lukas Endler; Martin Senekowitsch; Matthew Thornton; Michael Schuster; Michelle Chan; Petr Triska; Thomas Penz                                                                                                                                                                                                                                                                         |
| EPI_ISL_7502111, EPI_ISL_7616000                                                                                                                                                                                                                                                                                                                                                                                                                         | Ayass Bioscience LLC                                                                                | Ayass Bioscience LLC                                                                                                                         | Kevin Zhu; Lina Abi Mosleh; Mohamad Ammar Ayass; Natalya Griko; Nazanin Taheri                                                                                                                                                                                                                                                                                                                                                                                                                  |
| EPI_ISL_7400565                                                                                                                                                                                                                                                                                                                                                                                                                                          | Azienda Ospedaliera Pugliese Ciacchio di Catanzaro SOC Microbiologia e Virologia                    | Azienda Ospedaliera Pugliese Ciacchio di Catanzaro SOC Microbiologia e Virologia                                                             | Rossana Tallero Cincia Peronace Federica Pasceri Marco De Fazio Illenia Talotta Giuseppina Panduri Pasquale Minichella                                                                                                                                                                                                                                                                                                                                                                          |
| EPI_ISL_7338921                                                                                                                                                                                                                                                                                                                                                                                                                                          | Azienda Sanitaria dell'Alto Adige - Laboratorio Aziendale di Microbiologia e Virologia              | Azienda Sanitaria dell'Alto Adige                                                                                                            | Irene Bianconi                                                                                                                                                                                                                                                                                                                                                                                                                                                                                  |
| EPI_ISL_7226262                                                                                                                                                                                                                                                                                                                                                                                                                                          | BNH Hospital                                                                                        | National Institute of Health,                                                                                                                | Archawin Rojanawitwat; Ballang Uppapong; Beth Skaggs; Donlaya Maunplueng; Kazuhisa Okada; Nuttida Thongpramul; Pakorn Piromtong; Pibulakk Akkapaiboon Okada; Piroon Jenjaroenpun; Pongpun Sawatwong; Prapat Suriyaphol; Sirikanda Wimo; Siripaporn Phuygun; Sittiporn Parmmen; Supakit                                                                                                                                                                                                          |

|                                                                                                                                                                                                                                                                                                                                                                                                                                                                                                                                                                                                                                                                                                                                                                                                                                                                                                                                                                                                                                                                                              |                                                                                                          |                                                                                                                                                  |                                                                                                                                                                                                                                                                                              |                                                                                                                                                                                                                                                                                                                                                                                                                                                                                                                                                                                                                        |
|----------------------------------------------------------------------------------------------------------------------------------------------------------------------------------------------------------------------------------------------------------------------------------------------------------------------------------------------------------------------------------------------------------------------------------------------------------------------------------------------------------------------------------------------------------------------------------------------------------------------------------------------------------------------------------------------------------------------------------------------------------------------------------------------------------------------------------------------------------------------------------------------------------------------------------------------------------------------------------------------------------------------------------------------------------------------------------------------|----------------------------------------------------------------------------------------------------------|--------------------------------------------------------------------------------------------------------------------------------------------------|----------------------------------------------------------------------------------------------------------------------------------------------------------------------------------------------------------------------------------------------------------------------------------------------|------------------------------------------------------------------------------------------------------------------------------------------------------------------------------------------------------------------------------------------------------------------------------------------------------------------------------------------------------------------------------------------------------------------------------------------------------------------------------------------------------------------------------------------------------------------------------------------------------------------------|
|                                                                                                                                                                                                                                                                                                                                                                                                                                                                                                                                                                                                                                                                                                                                                                                                                                                                                                                                                                                                                                                                                              |                                                                                                          | Department of Medical Sciences,<br>Ministry of Public Health, Thailand                                                                           | Sirilak; Suratchana Mitrat; Thanutsapa Thanadachakul; Thidathip Wongsurawat                                                                                                                                                                                                                  |                                                                                                                                                                                                                                                                                                                                                                                                                                                                                                                                                                                                                        |
| EPI_ISL_7612892<br>EPI_ISL_7565149,<br>EPI_ISL_7565152                                                                                                                                                                                                                                                                                                                                                                                                                                                                                                                                                                                                                                                                                                                                                                                                                                                                                                                                                                                                                                       | BUMC Transplant Immunology Lab<br>Bari                                                                   | BUMC Transplant Immunology Lab<br>University of Bari Biomedical Sciences<br>and Human Oncology                                                   | Amanda Willis; Chiensao Wang; Jenifer Williams; Lynne Klingman; Medhat Askar; Pete Dysert<br>Maria Chironna                                                                                                                                                                                  |                                                                                                                                                                                                                                                                                                                                                                                                                                                                                                                                                                                                                        |
| EPI_ISL_7149647, EPI_ISL_7197950, EPI_ISL_7346925, EPI_ISL_7347257, EPI_ISL_7347522, EPI_ISL_7355779, EPI_ISL_7391885, EPI_ISL_7391908, EPI_ISL_7391931, EPI_ISL_7391984, EPI_ISL_7392005, EPI_ISL_7392027, EPI_ISL_7392079, EPI_ISL_7392087, EPI_ISL_7392093, EPI_ISL_7392139, EPI_ISL_7485998, EPI_ISL_7486106, EPI_ISL_7486193, EPI_ISL_7486452, EPI_ISL_7486697, EPI_ISL_7486742, EPI_ISL_7486808, EPI_ISL_7486814, EPI_ISL_7486850, EPI_ISL_7486923, EPI_ISL_7487524, EPI_ISL_7487623, EPI_ISL_7487665, EPI_ISL_7487692, EPI_ISL_7512352, EPI_ISL_7512373, EPI_ISL_7512378, EPI_ISL_7512381, EPI_ISL_7512410, EPI_ISL_7512438, EPI_ISL_7512444, EPI_ISL_7512448, EPI_ISL_7520500, EPI_ISL_7538419, EPI_ISL_7538437, EPI_ISL_7538529, EPI_ISL_7538539, EPI_ISL_7538562, EPI_ISL_7538591, EPI_ISL_7538628, EPI_ISL_7538662, EPI_ISL_7538687, EPI_ISL_7538812, EPI_ISL_7538904, EPI_ISL_7538963, EPI_ISL_7538983, EPI_ISL_7539099, EPI_ISL_7539114, EPI_ISL_7539140, EPI_ISL_7539157, EPI_ISL_7539216, EPI_ISL_7539258, EPI_ISL_7539330, EPI_ISL_7539359, EPI_ISL_7539677, EPI_ISL_7539761 | see above                                                                                                | Berkshire and Surrey Pathology<br>Services Lighthouse Laboratory                                                                                 | Wellcome Sanger Institute for the<br>COVID-19 Genomics UK (COG-UK)<br>Consortium                                                                                                                                                                                                             | Berkshire and Surrey Pathology Services Lighthouse Laboratory and Alex Alderton; Cordelia Langford; David K. Jackson; Dominic Kwiatkowski; Ewan Harrison; Ian Johnston; Jeffrey Barrett; John Sillitoe on behalf of the Wellcome Sanger Institute COVID-19 Surveillance Team; Roberto Amato; Sonia Goncalves                                                                                                                                                                                                                                                                                                           |
| EPI_ISL_7196120,<br>EPI_ISL_7196121                                                                                                                                                                                                                                                                                                                                                                                                                                                                                                                                                                                                                                                                                                                                                                                                                                                                                                                                                                                                                                                          | Bidh Lab                                                                                                 | National Public Health Laboratory                                                                                                                | Bidh Laboartory; National Public Health Laboratory Team                                                                                                                                                                                                                                      |                                                                                                                                                                                                                                                                                                                                                                                                                                                                                                                                                                                                                        |
| EPI_ISL_7464464,<br>EPI_ISL_7464465<br>EPI_ISL_7042354                                                                                                                                                                                                                                                                                                                                                                                                                                                                                                                                                                                                                                                                                                                                                                                                                                                                                                                                                                                                                                       | Biolab Diagnostic Laboratories                                                                           | Biolab Diagnostic Laboratories                                                                                                                   | Ahmad Tibi; Amid Abdelhour; Badia Saddedin; Eiad Atwa; Issa Abu-Dayyeh; Lama Hussein; Shaima Ali                                                                                                                                                                                             |                                                                                                                                                                                                                                                                                                                                                                                                                                                                                                                                                                                                                        |
| EPI_ISL_7417514<br>EPI_ISL_7544135,<br>EPI_ISL_7544479,<br>EPI_ISL_7544573                                                                                                                                                                                                                                                                                                                                                                                                                                                                                                                                                                                                                                                                                                                                                                                                                                                                                                                                                                                                                   | Biolytix AG                                                                                              | Clinical Bacteriology, University<br>Hospital Basel                                                                                              | Adrian Egli; Alfredo Mari; Fanny Wegner; Hans Hirsch; Helena MB Seth-Smith; Julia Bielecki; Karoline Leuzinger; Manuel Battegay; Tim Roloff                                                                                                                                                  |                                                                                                                                                                                                                                                                                                                                                                                                                                                                                                                                                                                                                        |
| EPI_ISL_7417514<br>EPI_ISL_7544135,<br>EPI_ISL_7544479,<br>EPI_ISL_7544573                                                                                                                                                                                                                                                                                                                                                                                                                                                                                                                                                                                                                                                                                                                                                                                                                                                                                                                                                                                                                   | Bioscientia Labor Wermsdorf<br>Bothasig CDC wc BLD                                                       | Robert Koch Institute<br>NHLS/UCT                                                                                                                | Arash Iranzadeh; Bruna Galvao; Carolyn Williamson; Deelan Doolabh; Diana Hardie; Gert Marais; Innocent Mudau; Luicer Olubayo; Lynn Tyers; Marvin Hsiao; Nokuzola Mbhele; Rageema Joseph; Stephen Korsman                                                                                     |                                                                                                                                                                                                                                                                                                                                                                                                                                                                                                                                                                                                                        |
| EPI_ISL_7548902, EPI_ISL_7548903, EPI_ISL_7548904, EPI_ISL_7548905, EPI_ISL_7548906, EPI_ISL_7548909, EPI_ISL_7548914, EPI_ISL_7548917, EPI_ISL_7548931, EPI_ISL_7552698, EPI_ISL_7552699, EPI_ISL_7566328, EPI_ISL_7566330, EPI_ISL_7566360                                                                                                                                                                                                                                                                                                                                                                                                                                                                                                                                                                                                                                                                                                                                                                                                                                                 | see above                                                                                                | Botswana Harvard HIV Reference<br>Laboratory                                                                                                     | Botswana Harvard AIDS Institute<br>Partnership, Plot 1836 North Ring<br>Road, Princess Marina Hospital,<br>Gaborone                                                                                                                                                                          | Boitumelo Zuze; Botshelo Radibe; Dorcas Maruapula; Doreen Ditshwanelo; Joseph Makhema; Keoratlhe Ntshambiwa; Kgomoiso Morusi; Legodile Kooeile; Mosepele Mosepele; Mphaphi B. Mbulawa; Ontlametse T. Bareng; Pamela Smith-Lawrence; Roger Shapiro; Sefetogi Ramadoga; Shahin Lockman; Sikhulile Moyo; Simani Gaseitsiwe; Thongbotho Mphoyakgosi; Wonderful T. Choga                                                                                                                                                                                                                                                    |
| EPI_ISL_6640916, EPI_ISL_6640917, EPI_ISL_6640919, EPI_ISL_6670244, EPI_ISL_6752026, EPI_ISL_6752027, EPI_ISL_6774081, EPI_ISL_6774083, EPI_ISL_6774084, EPI_ISL_6774085, EPI_ISL_6774087, EPI_ISL_6774088, EPI_ISL_6774089, EPI_ISL_6774090, EPI_ISL_6774091, EPI_ISL_6774093, EPI_ISL_7121195, EPI_ISL_7121204, EPI_ISL_7121205, EPI_ISL_7380512, EPI_ISL_7380515, EPI_ISL_7380524                                                                                                                                                                                                                                                                                                                                                                                                                                                                                                                                                                                                                                                                                                         | see above                                                                                                | Botswana Harvard HIV Reference<br>Laboratory                                                                                                     | Botswana Harvard HIV Reference<br>Laboratory                                                                                                                                                                                                                                                 | Boitumelo Zuze; Botshelo Radibe; Dorcas Maruapula; Joseph Makhema; Keoratlhe Ntshambiwa; Kgomoiso Morusi; Legodile Kooeile; Mosepele Mosepele; Mphaphi B. Mbulawa; Ontlametse T. Bareng; Pamela Smith-Lawrence; Roger Shapiro; Sefetogi Ramadoga; Shahin Lockman; Sikhulile Moyo; Simani Gaseitsiwe; Thongbotho Mphoyakgosi; Wonderful T. Choga                                                                                                                                                                                                                                                                        |
| EPI_ISL_7132804,<br>EPI_ISL_7370157,<br>EPI_ISL_7370181,<br>EPI_ISL_7370259,<br>EPI_ISL_7370472                                                                                                                                                                                                                                                                                                                                                                                                                                                                                                                                                                                                                                                                                                                                                                                                                                                                                                                                                                                              | British Columbia Centre For Disease<br>Control                                                           | BCCDC Public Health Laboratory                                                                                                                   | 655 W 12th Avenue; Ana Pacagnella; BC Canada VST 2N3; Corrinne Ng; Dan Fornika; John Tyson; Kim Macdonald; Kimia Kamelian; Linda Hoang; Loretta Janz; Mel Krajden; Prystajczyk Natalie; Robert Azana; Shannon Russell; Vancouver                                                             |                                                                                                                                                                                                                                                                                                                                                                                                                                                                                                                                                                                                                        |
| EPI_ISL_7390696, EPI_ISL_7391208, EPI_ISL_7453171, EPI_ISL_7453991, EPI_ISL_7454277, EPI_ISL_7542815, EPI_ISL_7543162, EPI_ISL_7543543, EPI_ISL_7543579, EPI_ISL_7544427, EPI_ISL_7544520, EPI_ISL_7547858, EPI_ISL_7548157, EPI_ISL_7550313, EPI_ISL_7550474, EPI_ISL_7550515, EPI_ISL_7550529, EPI_ISL_7550748                                                                                                                                                                                                                                                                                                                                                                                                                                                                                                                                                                                                                                                                                                                                                                             | see above                                                                                                | Broad Institute Clinical Research<br>Sequencing Platform                                                                                         | Infectious Disease Program, Broad<br>Institute of Harvard and MIT                                                                                                                                                                                                                            | Adams, G.; B.L.; B.W.; Bauer, M.; Birren; Blumenstiel, B.; Brown, C.; Carter, A.; Chaluvasi, S.; D.J.; Defelice, M.; DeRuff, K.; Dodge, S.; Gabriel, S.; Gallagher, G.; Gladden-Young, A.; Granger, B.; J.E.; K.J.; Lagerborg, K.; Larkin, K.; Lee, M.; Lemieux; Lennon, N.; Loreth, C.; Madoff, L.; McGovern, S.; Meldrim, J.; Normandin, E.; P.C.; Park; Pearlman, L.; Reilly, S.; Rudy, M.; Sabeti; Siddie; Smole, S.; Tomkins-Tinch, C.; Vicente, G.; and MacDnnis Carlos Hobeich; Francisco Vidal; Irene Corrales; Lorena Ramirez; Maria Gloria Soria; Natalia Comes; Nina Borrás; Noemi Gonzalez; Silvia Sauleda |
| EPI_ISL_7263830<br>EPI_ISL_7477252<br>EPI_ISL_7427856                                                                                                                                                                                                                                                                                                                                                                                                                                                                                                                                                                                                                                                                                                                                                                                                                                                                                                                                                                                                                                        | CAP Roger de Flor<br>CDPH VBL<br>CENTOGENE Frankfurt Laboratory;<br>Niederlassung Industriepark Höchst   | Banc de Sang i Teixits<br>California Department of Public Health<br>Robert Koch Institute                                                        | Emily Smith on behalf of CDPH-COVIDNet                                                                                                                                                                                                                                                       |                                                                                                                                                                                                                                                                                                                                                                                                                                                                                                                                                                                                                        |
| EPI_ISL_7547731                                                                                                                                                                                                                                                                                                                                                                                                                                                                                                                                                                                                                                                                                                                                                                                                                                                                                                                                                                                                                                                                              | CENTOLAB                                                                                                 | National Reference Laboratory, Nigeria<br>Centre for Disease Control                                                                             | Catherine Okoi; Chimaobi Chukwu; Dr Ifedayo Adetifa; Dr Ndodo Nnaemeka; Dr Omoare Adesuyi; Nwando Mba; Olajumoke Babatunde; Olusola Anuoluwapo Akanbi; Oyeronke Ayansola                                                                                                                     |                                                                                                                                                                                                                                                                                                                                                                                                                                                                                                                                                                                                                        |
| EPI_ISL_6862897<br>EPI_ISL_6962948,<br>EPI_ISL_6967758                                                                                                                                                                                                                                                                                                                                                                                                                                                                                                                                                                                                                                                                                                                                                                                                                                                                                                                                                                                                                                       | CERBALLIANCE<br>CERBALLIANCE PARIS ET IDF EST                                                            | UMR PIMIT<br>CERBA HealthCare                                                                                                                    | David A Wilkinson; Patrick Mavingui<br>Bénédicte Roquebert; Johanna Roux; Judith Zerah; Laura Verdure; Sabine Trombert; Stéphanie Haim-Boukobza                                                                                                                                              |                                                                                                                                                                                                                                                                                                                                                                                                                                                                                                                                                                                                                        |
| EPI_ISL_7226961                                                                                                                                                                                                                                                                                                                                                                                                                                                                                                                                                                                                                                                                                                                                                                                                                                                                                                                                                                                                                                                                              | CHU de Bordeaux                                                                                          | CNR Virus des Infections Respiratoires -<br>France SUD                                                                                           | Antonin Bal; Bruno Lina; Bruno Simon; Denis Malvy; Gregory Destras; Gwendolynne Burfin; Hadrien Regue; Laurence Josset; Marie-Edith Lafon; Martine Valette; Pantxika Bellecave; Quentin Semanas                                                                                              |                                                                                                                                                                                                                                                                                                                                                                                                                                                                                                                                                                                                                        |
| EPI_ISL_7268670,<br>EPI_ISL_7269933<br>EPI_ISL_7313633<br>EPI_ISL_7137326,<br>EPI_ISL_7137327,<br>EPI_ISL_7137328,<br>EPI_ISL_7137330                                                                                                                                                                                                                                                                                                                                                                                                                                                                                                                                                                                                                                                                                                                                                                                                                                                                                                                                                        | CLINA-LANCET LABORATOIRES<br>CT Department of Public Health<br>California Department of Public<br>Health | National Reference Laboratory, Nigeria<br>Centre for Disease Control<br>CT Department of Public Health<br>California Department of Public Health | Catherine Okoi; Chimaobi Chukwu; Dr Ifedayo Adetifa; Dr Ndodo Nnaemeka; Dr Omoare Adesuyi; Nwando Mba; Olajumoke Babatunde; Olusola Anuoluwapo Akanbi; Oyeronke Ayansola<br>Claire Pearson; Tu N. Nguyen<br>CDPH IDLB COVIDNet                                                               |                                                                                                                                                                                                                                                                                                                                                                                                                                                                                                                                                                                                                        |
| EPI_ISL_7217437,<br>EPI_ISL_7217563                                                                                                                                                                                                                                                                                                                                                                                                                                                                                                                                                                                                                                                                                                                                                                                                                                                                                                                                                                                                                                                          | Cantacuzino National Military-<br>Medical Institute, Viral Respiratory<br>Infections Laboratory          | Cantacuzino Institute Virology                                                                                                                   | Luiza Ustoa; Mihaela Lazar; Mihaela Oprea; Nicoleta Paraschiv; Sorin Dinu                                                                                                                                                                                                                    |                                                                                                                                                                                                                                                                                                                                                                                                                                                                                                                                                                                                                        |
| EPI_ISL_7571582                                                                                                                                                                                                                                                                                                                                                                                                                                                                                                                                                                                                                                                                                                                                                                                                                                                                                                                                                                                                                                                                              | Centre Hospitalier Universitaire<br>Clermont-Ferrand                                                     | CHU Clermont-Ferrand, service de<br>virologie                                                                                                    | Bisseux Maxime; Combes Patricia; Henquell Cecile; Mirand Audrey                                                                                                                                                                                                                              |                                                                                                                                                                                                                                                                                                                                                                                                                                                                                                                                                                                                                        |
| EPI_ISL_6980876<br>EPI_ISL_7019047                                                                                                                                                                                                                                                                                                                                                                                                                                                                                                                                                                                                                                                                                                                                                                                                                                                                                                                                                                                                                                                           | Cerballiance, Reunion<br>Charité Universitätsmedizin Berlin,<br>Institute of Virology                    | UMR PIMIT<br>Charité Universitätsmedizin Berlin,<br>Institute of Virology                                                                        | David A Wilkinson; Patrick Mavingui<br>Barbara Mühlemann; Christian Drosten; Julia Schneider; Julia Tesch; Jörn Beheim-Schwarzbach; Talitha Velth; Terry Jones; Tobias Bleicker; Victor M Corman                                                                                             |                                                                                                                                                                                                                                                                                                                                                                                                                                                                                                                                                                                                                        |
| EPI_ISL_7337463, EPI_ISL_7337464, EPI_ISL_7337465, EPI_ISL_7337466, EPI_ISL_7337468, EPI_ISL_7337469, EPI_ISL_7337470, EPI_ISL_7337471, EPI_ISL_7337472, EPI_ISL_7337473, EPI_ISL_7337474, EPI_ISL_7337475, EPI_ISL_7337476, EPI_ISL_7337477, EPI_ISL_7337478, EPI_ISL_7337479, EPI_ISL_7337480, EPI_ISL_7337481, EPI_ISL_7337482, EPI_ISL_7337483, EPI_ISL_7337484, EPI_ISL_7337485, EPI_ISL_7337486, EPI_ISL_7337487, EPI_ISL_7337488, EPI_ISL_7337489, EPI_ISL_7337490, EPI_ISL_7337495, EPI_ISL_7337496, EPI_ISL_7337497, EPI_ISL_7337498, EPI_ISL_7337499, EPI_ISL_7337500, EPI_ISL_7337501, EPI_ISL_7337502, EPI_ISL_7337503, EPI_ISL_7337504, EPI_ISL_7337505, EPI_ISL_7337506, EPI_ISL_7337507, EPI_ISL_7337508, EPI_ISL_7337509, EPI_ISL_7337510, EPI_ISL_7337511                                                                                                                                                                                                                                                                                                                   | see above                                                                                                | Charlotte Maxeke Johannesburg<br>Academic Hospital                                                                                               | National Institute for Communicable<br>Diseases of the National Health<br>Laboratory Service                                                                                                                                                                                                 | Amoako DG; Bhiman JN; Everatt J; Ismail A; Mahangu B; Mnguni A; Mohale T; Ntuli N; Scheepers C                                                                                                                                                                                                                                                                                                                                                                                                                                                                                                                         |
| EPI_ISL_7337512, EPI_ISL_7337513, EPI_ISL_7337515, EPI_ISL_7337516, EPI_ISL_7337517, EPI_ISL_7337518, EPI_ISL_7337520, EPI_ISL_7337521, EPI_ISL_7337524, EPI_ISL_7337525, EPI_ISL_7337527, EPI_ISL_7337528, EPI_ISL_7337531, EPI_ISL_7337532, EPI_ISL_7337533, EPI_ISL_7337534, EPI_ISL_7337535, EPI_ISL_7337536, EPI_ISL_7337537, EPI_ISL_7337538, EPI_ISL_7337539, EPI_ISL_7337540, EPI_ISL_7337541, EPI_ISL_7337542, EPI_ISL_7337543, EPI_ISL_7337544, EPI_ISL_7337545, EPI_ISL_7337546, EPI_ISL_7337547, EPI_ISL_7337548, EPI_ISL_7337549, EPI_ISL_7337550, EPI_ISL_7337551, EPI_ISL_7337552, EPI_ISL_7337553, EPI_ISL_7337554, EPI_ISL_7337555, EPI_ISL_7337556, EPI_ISL_7337557, EPI_ISL_7337558, EPI_ISL_7337559, EPI_ISL_7337560, EPI_ISL_7337561, EPI_ISL_7337562, EPI_ISL_7337563, EPI_ISL_7337564                                                                                                                                                                                                                                                                                 | see above                                                                                                | Chris Hani Baragwanath Laboratory                                                                                                                | National Institute for Communicable<br>Diseases of the National Health<br>Laboratory Service                                                                                                                                                                                                 | Amoako DG; Bhiman JN; Everatt J; Ismail A; Mahangu B; Mnguni A; Mohale T; Ntuli N; Scheepers C                                                                                                                                                                                                                                                                                                                                                                                                                                                                                                                         |
| EPI_ISL_7154390                                                                                                                                                                                                                                                                                                                                                                                                                                                                                                                                                                                                                                                                                                                                                                                                                                                                                                                                                                                                                                                                              | CLINA-Lancet                                                                                             | National Reference Laboratory, Nigeria<br>Centre for Disease Control                                                                             | Catherine Okoi; Chimaobi Chukwu; Dr Ifedayo Adetifa; Dr Ndodo Nnaemeka; Dr Omoare Adesuyi; Nwando Mba; Olajumoke Babatunde; Olusola Anuoluwapo Akanbi; Oyeronke Ayansola                                                                                                                     |                                                                                                                                                                                                                                                                                                                                                                                                                                                                                                                                                                                                                        |
| EPI_ISL_7265967, EPI_ISL_7265976, EPI_ISL_7265979, EPI_ISL_7266027, EPI_ISL_7266045, EPI_ISL_7266056, EPI_ISL_7266083, EPI_ISL_7266160, EPI_ISL_7552013, EPI_ISL_7552178, EPI_ISL_7552184, EPI_ISL_7552302, EPI_ISL_7552311, EPI_ISL_7552313, EPI_ISL_7552316, EPI_ISL_7552499, EPI_ISL_7552502, EPI_ISL_7552514, EPI_ISL_7552588, EPI_ISL_7552623, EPI_ISL_7552635, EPI_ISL_7552636                                                                                                                                                                                                                                                                                                                                                                                                                                                                                                                                                                                                                                                                                                         | see above                                                                                                | Clinical Microbiology Laboratory, Tel<br>Aviv Sourasky Medical Center                                                                            | Clinical Microbiology Laboratory, Tel<br>Aviv Sourasky Medical Center                                                                                                                                                                                                                        | Alon Ziv; Amos Adler; Katya Levytsky; Lior Handler; Ora Halutz                                                                                                                                                                                                                                                                                                                                                                                                                                                                                                                                                         |
| EPI_ISL_7042161, EPI_ISL_7042168, EPI_ISL_7462220, EPI_ISL_7462233, EPI_ISL_7462310, EPI_ISL_7462311, EPI_ISL_7462312                                                                                                                                                                                                                                                                                                                                                                                                                                                                                                                                                                                                                                                                                                                                                                                                                                                                                                                                                                        | see above                                                                                                | Clinical Virology                                                                                                                                | Clinical Bacteriology, University<br>Hospital Basel                                                                                                                                                                                                                                          | Adrian Egli; Alfredo Mari; Fanny Wegner; Hans Hirsch; Helena MB Seth-Smith; Julia Bielecki; Karoline Leuzinger; Manuel Battegay; Tim Roloff                                                                                                                                                                                                                                                                                                                                                                                                                                                                            |
| EPI_ISL_7373598                                                                                                                                                                                                                                                                                                                                                                                                                                                                                                                                                                                                                                                                                                                                                                                                                                                                                                                                                                                                                                                                              | Clinical Virology, Children's Hospital<br>Los Angeles                                                    | Clinical Virology, Children's Hospital<br>Los Angeles                                                                                            | Alexander Judkins; Cheryl Pool; Javier Mestas; Jennifer Dien Bard; John Fissel; Maurice O'Gorman                                                                                                                                                                                             |                                                                                                                                                                                                                                                                                                                                                                                                                                                                                                                                                                                                                        |
| EPI_ISL_7462438<br>EPI_ISL_6951145                                                                                                                                                                                                                                                                                                                                                                                                                                                                                                                                                                                                                                                                                                                                                                                                                                                                                                                                                                                                                                                           | Cliniques universitaires Saint-Luc<br>Color Genomics                                                     | UCLouvain/REC/MBLG-CTMA<br>Chiu Laboratory, University of<br>California, San Francisco                                                           | Benoit Kabamba Mukadi; Bertrand Bearzatto; Jean-Luc Gaba; Nicolas Pinte; Paul Blanpain; Simon Ophélie; Valentin Coste<br>Alicia Sotomayor-Gonzalez; Alicia Zhou; Amy Garlin; Charles Chiu; Darpun Sachdev; Katherine Hernandez; Scott Topper; Susan Philip; Venice Servellita; Yueyuan Zhang |                                                                                                                                                                                                                                                                                                                                                                                                                                                                                                                                                                                                                        |
| EPI_ISL_7010485                                                                                                                                                                                                                                                                                                                                                                                                                                                                                                                                                                                                                                                                                                                                                                                                                                                                                                                                                                                                                                                                              | Colorado Department of Public<br>Health and Environment                                                  | Colorado Department of Public Health<br>and Environment                                                                                          | Alexandria Rossheim; Diana Ir; Emily A. Travanty; Laura Bankers; Mandy Waters; Michael A. Martin; Molly C. Hetherington-Rauth; Sarah Elizabeth Totten; Shannon R. Matzinger                                                                                                                  |                                                                                                                                                                                                                                                                                                                                                                                                                                                                                                                                                                                                                        |
| EPI_ISL_7613413                                                                                                                                                                                                                                                                                                                                                                                                                                                                                                                                                                                                                                                                                                                                                                                                                                                                                                                                                                                                                                                                              | Community Labs, San Antonio                                                                              | STRL UT Health San Antonio, Greehey<br>Children's Cancer Research Institute                                                                      | Bethany Landry; Dawn Garcia; Guillermo Nunez; Hongxin Fan; Joseffina Stoevers; Korri Weldon; Kumari Vadlamudi; Marjorie Parker David; San Antonio Metropolitan Health District; Texas Department of State Health Services; Weijing He; Yidong Chen; Zhao Lai; Zhenqing Ye                    |                                                                                                                                                                                                                                                                                                                                                                                                                                                                                                                                                                                                                        |

|                                                                                                                                                                                                                                                                                                                                                                                                                                                                                                                                                                                                                                                                                                                                                                                                                                                                                                                                                                                                                                                                                                                                                                                                                                                                                                                                                                                                                                                                                                                                                                                                                                                                                                                                                                                                                                                                                                                                                                                                                                                                                                                                                                                                                                                                                                  |                                                                                                                                                                                                                                                                                                                                                                                           |                                                                                                                                                                                                                                                                                                                                                                                                                                                                                                                              |                                                                                                                                                                                                                                                                                                                                                                                                                                                                                                                                                                                                                                                                                                                                                                                                                                                                                                                                                                                                                |
|--------------------------------------------------------------------------------------------------------------------------------------------------------------------------------------------------------------------------------------------------------------------------------------------------------------------------------------------------------------------------------------------------------------------------------------------------------------------------------------------------------------------------------------------------------------------------------------------------------------------------------------------------------------------------------------------------------------------------------------------------------------------------------------------------------------------------------------------------------------------------------------------------------------------------------------------------------------------------------------------------------------------------------------------------------------------------------------------------------------------------------------------------------------------------------------------------------------------------------------------------------------------------------------------------------------------------------------------------------------------------------------------------------------------------------------------------------------------------------------------------------------------------------------------------------------------------------------------------------------------------------------------------------------------------------------------------------------------------------------------------------------------------------------------------------------------------------------------------------------------------------------------------------------------------------------------------------------------------------------------------------------------------------------------------------------------------------------------------------------------------------------------------------------------------------------------------------------------------------------------------------------------------------------------------|-------------------------------------------------------------------------------------------------------------------------------------------------------------------------------------------------------------------------------------------------------------------------------------------------------------------------------------------------------------------------------------------|------------------------------------------------------------------------------------------------------------------------------------------------------------------------------------------------------------------------------------------------------------------------------------------------------------------------------------------------------------------------------------------------------------------------------------------------------------------------------------------------------------------------------|----------------------------------------------------------------------------------------------------------------------------------------------------------------------------------------------------------------------------------------------------------------------------------------------------------------------------------------------------------------------------------------------------------------------------------------------------------------------------------------------------------------------------------------------------------------------------------------------------------------------------------------------------------------------------------------------------------------------------------------------------------------------------------------------------------------------------------------------------------------------------------------------------------------------------------------------------------------------------------------------------------------|
| EPI_ISL_7451063,<br>EPI_ISL_7451073,<br>EPI_ISL_7451079,<br>EPI_ISL_7451089<br>EPI_ISL_7609869<br>EPI_ISL_7605689,<br>EPI_ISL_7605739,<br>EPI_ISL_7605775                                                                                                                                                                                                                                                                                                                                                                                                                                                                                                                                                                                                                                                                                                                                                                                                                                                                                                                                                                                                                                                                                                                                                                                                                                                                                                                                                                                                                                                                                                                                                                                                                                                                                                                                                                                                                                                                                                                                                                                                                                                                                                                                        | Cruz Vermelha Portuguesa<br><br>Curative Labs<br>DE AAR LABORATORY                                                                                                                                                                                                                                                                                                                        | Instituto Nacional de Saude (INSA)<br><br>Curative Labs<br>National Institute for Communicable<br>Diseases of the National Health<br>Laboratory Service                                                                                                                                                                                                                                                                                                                                                                      | Borges et al<br><br>Elias L. Salfati; Eugenia Khorosheva; George Way; J.Cesar Ignacio-Espinoza; Janet Chen; Mikhail Hanewich-Hollatz; Nabjot Sandhu; Sophia Quasem; Vladimir Slepnev; Zhiyi Xie<br>Amoako DG; Bhiman JN; Everatt J; Ismail A; Mahlangu B; Mnguni A; Mohale T; Ntuli N; Scheepers C; Wolter N                                                                                                                                                                                                                                                                                                                                                                                                                                                                                                                                                                                                                                                                                                   |
| EPI_ISL_7062087, EPI_ISL_7063588, EPI_ISL_7272249, EPI_ISL_7514034, EPI_ISL_7514991, EPI_ISL_7515043, EPI_ISL_7515374, EPI_ISL_7516043, EPI_ISL_7517471, EPI_ISL_7517646, EPI_ISL_7518103, EPI_ISL_7518795, EPI_ISL_7520214, EPI_ISL_7520543, EPI_ISL_7520819, EPI_ISL_7523657, EPI_ISL_7525859, EPI_ISL_7526218, EPI_ISL_7528707, EPI_ISL_7529040, EPI_ISL_7529817, EPI_ISL_7530609, EPI_ISL_7532336, EPI_ISL_7532391, EPI_ISL_7533005, EPI_ISL_7534407, EPI_ISL_7534541, EPI_ISL_7596661, EPI_ISL_7596668, EPI_ISL_7596669, EPI_ISL_7596670, EPI_ISL_7596683, EPI_ISL_7596684, EPI_ISL_7596696, EPI_ISL_7596697, EPI_ISL_7596702, EPI_ISL_7599427, EPI_ISL_7599604, EPI_ISL_7599994, EPI_ISL_7600175, EPI_ISL_7600348, EPI_ISL_7600349, EPI_ISL_7600356, EPI_ISL_7600506, EPI_ISL_7600699, EPI_ISL_7600710, EPI_ISL_7600940, EPI_ISL_7600946, EPI_ISL_7601285, EPI_ISL_7601634, EPI_ISL_7601635, EPI_ISL_7601645, EPI_ISL_7601647, EPI_ISL_7601691, EPI_ISL_7602008, EPI_ISL_7602017, EPI_ISL_7602018, EPI_ISL_7602026, EPI_ISL_7602027, EPI_ISL_7602028, EPI_ISL_7602031, EPI_ISL_7602182, EPI_ISL_7602236, EPI_ISL_7602366, EPI_ISL_7602373, EPI_ISL_7602581, EPI_ISL_7602582, EPI_ISL_7602583, EPI_ISL_7602584, EPI_ISL_7602585, EPI_ISL_7602591, EPI_ISL_7602592, EPI_ISL_7602593, EPI_ISL_7602594, EPI_ISL_7602601, EPI_ISL_7602607, EPI_ISL_7602608, EPI_ISL_7602609, EPI_ISL_7602610, EPI_ISL_7602617, EPI_ISL_7602618, EPI_ISL_7602619, EPI_ISL_7602620, EPI_ISL_7602625, EPI_ISL_7602626, EPI_ISL_7602627, EPI_ISL_7602628, EPI_ISL_7602636, EPI_ISL_7602637, EPI_ISL_7602638, EPI_ISL_7602644, EPI_ISL_7602645, EPI_ISL_7602647, EPI_ISL_7602657, EPI_ISL_7602658, EPI_ISL_7602664, EPI_ISL_7602665, EPI_ISL_7602667, EPI_ISL_7602673, EPI_ISL_7602674, EPI_ISL_7602675, EPI_ISL_7602676, EPI_ISL_7602685, EPI_ISL_7602686, EPI_ISL_7638530, EPI_ISL_7638596, EPI_ISL_7638689, EPI_ISL_7638718, EPI_ISL_7639039, EPI_ISL_7639117, EPI_ISL_7639395, EPI_ISL_7639484, EPI_ISL_7640293, EPI_ISL_7640569, EPI_ISL_7640706, EPI_ISL_7640724, EPI_ISL_7640969, EPI_ISL_7641033, EPI_ISL_7642298, EPI_ISL_7642471, EPI_ISL_7642555, EPI_ISL_7642579, EPI_ISL_7642615, EPI_ISL_7642958, EPI_ISL_7642986, EPI_ISL_7643084, EPI_ISL_7643799, EPI_ISL_7644130, EPI_ISL_7644179, EPI_ISL_7644186 | Department of Bacteria, Parasites<br>and Fungi, Statens Serum Institut,<br>Copenhagen, Denmark<br>Department of Clinical Microbiology<br>Odense University Hospital, Odense,<br>Denmark<br>Department of Health Technology and<br>Informatics, The Hong Kong<br>Polytechnic University<br>Department of Microbiology, The<br>University of Hong Kong                                      | Statens Serum Institut Bioinformatics<br>and Microbial Genomics<br>GIGA Medical Genomics<br>Statens Serum Institut Bioinformatics<br>and Microbial Genomics<br>Department of Health Technology and<br>Informatics, The Hong Kong<br>Polytechnic University<br>Department of Microbiology, The<br>University of Hong Kong                                                                                                                                                                                                     | Danish Covid-19 Genome Consortium<br><br>Bouchra Boujemla; Claire Gourzonès; Cécile Meex; Keith Durkin; Laurent Gillet; Maria Artesi; Marie-Pierre Hayette; Nadine Cambisano; Nathalie Renotte; Olivier Ek; Sébastien Bontems; Vincent Bours<br>Danish Covid-19 Genome Consortium<br><br>Alan Ka-Lun Wu; Alex Yat-Man Ho; Barry Kin-Chung Wong; Chloe Toi-Mei Chan; David Ho-Keung Shum; Denise Sze-Hang Wong; Gilman Kit-Hang Siu; Hui-Yin Lao; Hoi-Ching Jim; Ivan Tak-Fai Wong; Jake Siu-Lun Leung; Kam-Tong Yip; Kenneth Siu-Sing Leung; Kingsley King-Gee Tam; Kitty Sau-Chun Fung; Kristine Luk; Lam-Kwong Lee; Miranda Chong-Yee Yau; Sandy Ka-Yee Chau; Shea Ping Yip; Tak-Lun Que; Timothy Ting-Leung Ng; Wing Cheong Yam; Wing-Hei Lo; Wing-Kin To; Yvette Wai-Man Lai<br><br>Kelvin K.W. To; Kwok-Yung Yuen                                                                                                                                                                                         |
| EPI_ISL_7042669<br>EPI_ISL_7512899,<br>EPI_ISL_7520649,<br>EPI_ISL_7531709,<br>EPI_ISL_7535337,<br>EPI_ISL_7533749<br>EPI_ISL_7192723,<br>EPI_ISL_7192733,<br>EPI_ISL_7192734,<br>EPI_ISL_7485700<br>EPI_ISL_6841980,<br>EPI_ISL_6841981,<br>EPI_ISL_7138045,<br>EPI_ISL_7357684,<br>EPI_ISL_7385702<br>EPI_ISL_7571413                                                                                                                                                                                                                                                                                                                                                                                                                                                                                                                                                                                                                                                                                                                                                                                                                                                                                                                                                                                                                                                                                                                                                                                                                                                                                                                                                                                                                                                                                                                                                                                                                                                                                                                                                                                                                                                                                                                                                                          | Department of Clinical Microbiology<br>Department of Clinical Microbiology,<br>Odense University Hospital, Odense,<br>Denmark<br>Department of Health Technology and<br>Informatics, The Hong Kong<br>Polytechnic University<br>Department of Microbiology, The<br>University of Hong Kong<br>Department of Pathology and<br>Laboratory Medicine, AKUH<br>Laboratories, Karachi, Pakistan | Statens Serum Institut Bioinformatics<br>and Microbial Genomics<br>Statens Serum Institut Bioinformatics<br>and Microbial Genomics<br>Department of Health Technology and<br>Informatics, The Hong Kong<br>Polytechnic University<br>Department of Microbiology, The<br>University of Hong Kong<br>Department of Virology<br>Laboratory Medicine, AKUH<br>Laboratories, Karachi, Pakistan                                                                                                                                    | Bouchra Boujemla; Claire Gourzonès; Cécile Meex; Keith Durkin; Laurent Gillet; Maria Artesi; Marie-Pierre Hayette; Nadine Cambisano; Nathalie Renotte; Olivier Ek; Sébastien Bontems; Vincent Bours<br>Danish Covid-19 Genome Consortium<br><br>Alan Ka-Lun Wu; Alex Yat-Man Ho; Barry Kin-Chung Wong; Chloe Toi-Mei Chan; David Ho-Keung Shum; Denise Sze-Hang Wong; Gilman Kit-Hang Siu; Hui-Yin Lao; Hoi-Ching Jim; Ivan Tak-Fai Wong; Jake Siu-Lun Leung; Kam-Tong Yip; Kenneth Siu-Sing Leung; Kingsley King-Gee Tam; Kitty Sau-Chun Fung; Kristine Luk; Lam-Kwong Lee; Miranda Chong-Yee Yau; Sandy Ka-Yee Chau; Shea Ping Yip; Tak-Lun Que; Timothy Ting-Leung Ng; Wing Cheong Yam; Wing-Hei Lo; Wing-Kin To; Yvette Wai-Man Lai<br><br>Kelvin K.W. To; Kwok-Yung Yuen<br><br>A. Kanji; A. Nasir; A. Samreen; A.R. Bukhari; Aamer Ikram; Abdul Ahad; J. Ashraf; Massab Umair; Muhammad Ammar; Muhammad Salman; Nazish Badar; Qasim Ali; R. Hasan; Syed Adnan Haider; U.B. Aamir; Z. Hasan; Zaira Rehman |
| EPI_ISL_7201444,<br>EPI_ISL_7624156,<br>EPI_ISL_7624213<br>EPI_ISL_7623676                                                                                                                                                                                                                                                                                                                                                                                                                                                                                                                                                                                                                                                                                                                                                                                                                                                                                                                                                                                                                                                                                                                                                                                                                                                                                                                                                                                                                                                                                                                                                                                                                                                                                                                                                                                                                                                                                                                                                                                                                                                                                                                                                                                                                       | Department of Virology and<br>Immunology, University of Helsinki<br>and Helsinki University Hospital,<br>Helsinki, Finland<br>Dept of Microbiology, Maulana Azad<br>Medical College                                                                                                                                                                                                       | Department of Virology, Faculty of<br>Medicine, University of Helsinki,<br>Helsinki, Finland<br>J6094_MAMC_LNH                                                                                                                                                                                                                                                                                                                                                                                                               | Hanna Jarva; Hanna Liimatainen; Hanna Vauhkonen; Hussein Alburkat; Maija Loppalainen; Mert Erdin; Olli Vapalahti; Phuoc Truong; Ravi Kant; Sari Hannula; Satu Kurekka; Teemu Smura<br><br>Avinash Lomash; Mohammad Faruq; Oves Siddiqui; SCOG_MAMC_LNH; Seema Kapoor; Sunil Kumar Polipalli; Somesh Kumar; Suresh Kumar                                                                                                                                                                                                                                                                                                                                                                                                                                                                                                                                                                                                                                                                                        |
| EPI_ISL_6972689<br>EPI_ISL_7464539,<br>EPI_ISL_7464543<br>EPI_ISL_7121080                                                                                                                                                                                                                                                                                                                                                                                                                                                                                                                                                                                                                                                                                                                                                                                                                                                                                                                                                                                                                                                                                                                                                                                                                                                                                                                                                                                                                                                                                                                                                                                                                                                                                                                                                                                                                                                                                                                                                                                                                                                                                                                                                                                                                        | Dept. of Laboratory Medicine<br>Dept. of Microbiology and Infection<br>Control, Akershus University<br>Hospital HF<br>Diagnofirm Medical Laboratories                                                                                                                                                                                                                                     | Dept. of Laboratory Medicine<br>Dept. of Microbiology and Infection<br>Control, Akershus University Hospital<br>HF<br>Botswana Harvard HIV Reference<br>Laboratory                                                                                                                                                                                                                                                                                                                                                           | Claudia Weber; Fabian Konig; Harald Esterbauer; Oswald Wagner; Robert Strassl; Sabina Plummer; Victoria Six<br>Alexander Hesseberg Levstad; Hege Vangstein Aamot<br><br>Boitumelo Zuze; Botshelo Radibe; Dorcas Maruapula; Joseph Makhema; Keoratlhe Ntshambiwa; Kgomoiso Moruosi; Legodile Kooeile; Mosepele Mosepele; Mophapi B. Mbulawa; Ontlameitse T. Bareng; Pamela Smith-Lawrence; Roger Shapiro; Sefetogi Ramadoga; Shahin Lockman; Sikhulile Moyo; Simani Gaseitsiwe; Thongbotho Mphoyakgosi; Wonderful T. Choga                                                                                                                                                                                                                                                                                                                                                                                                                                                                                      |
| EPI_ISL_6959926, EPI_ISL_6959935, EPI_ISL_6959993, EPI_ISL_7406117, EPI_ISL_7406118, EPI_ISL_7406119, EPI_ISL_7406124, EPI_ISL_7406125, EPI_ISL_7406126                                                                                                                                                                                                                                                                                                                                                                                                                                                                                                                                                                                                                                                                                                                                                                                                                                                                                                                                                                                                                                                                                                                                                                                                                                                                                                                                                                                                                                                                                                                                                                                                                                                                                                                                                                                                                                                                                                                                                                                                                                                                                                                                          | Division of Emerging Infectious<br>Diseases, Bureau of Infectious<br>Diseases Diagnosis Control, Korea<br>Disease Control and Prevention<br>Agency                                                                                                                                                                                                                                        | Division of Emerging Infectious<br>Diseases, Bureau of Infectious<br>Diseases Diagnosis Control, Korea Disease<br>Control and Prevention Agency                                                                                                                                                                                                                                                                                                                                                                              | Ae Kyung Park; Chae Young Lee; Eun-Jin Kim; Heui Man Kim; Hyuck Jin Lee; Il-Hwan Kim; Jeong-Ah Kim; Jeong-Min Kim                                                                                                                                                                                                                                                                                                                                                                                                                                                                                                                                                                                                                                                                                                                                                                                                                                                                                              |
| EPI_ISL_6842156, EPI_ISL_6842159, EPI_ISL_6842162, EPI_ISL_6842163, EPI_ISL_6842165, EPI_ISL_7452732, EPI_ISL_7452733, EPI_ISL_7452734, EPI_ISL_7452735, EPI_ISL_7452736, EPI_ISL_7452737, EPI_ISL_7452738, EPI_ISL_7452741, EPI_ISL_7452742, EPI_ISL_7452744, EPI_ISL_7452745, EPI_ISL_7452746, EPI_ISL_7452749, EPI_ISL_7452750, EPI_ISL_7452751, EPI_ISL_7452758, EPI_ISL_7452761, EPI_ISL_7452762, EPI_ISL_7452763, EPI_ISL_7452764, EPI_ISL_7452765, EPI_ISL_7452771, EPI_ISL_7452780, EPI_ISL_7452781, EPI_ISL_7452782, EPI_ISL_7452783, EPI_ISL_7452785, EPI_ISL_7452792, EPI_ISL_7452793, EPI_ISL_7452794, EPI_ISL_7452795, EPI_ISL_7452796, EPI_ISL_7452797, EPI_ISL_7452798, EPI_ISL_7452799, EPI_ISL_7452800, EPI_ISL_7456525, EPI_ISL_7456526, EPI_ISL_7544929                                                                                                                                                                                                                                                                                                                                                                                                                                                                                                                                                                                                                                                                                                                                                                                                                                                                                                                                                                                                                                                                                                                                                                                                                                                                                                                                                                                                                                                                                                                       | Division of Medical Virology,<br>National Health Laboratory Service<br>(NHLS), Tygerberg Hospital /<br>Stellenbosch University<br>Dr. Risch Ostschweiz AG                                                                                                                                                                                                                                 | Division of Medical Virology, National<br>Health Laboratory Service (NHLS),<br>Tygerberg Hospital / Stellenbosch<br>University<br>Dr Risch Laboratory                                                                                                                                                                                                                                                                                                                                                                        | Gert van Zyl; Kamela Mahlkwane; Shannon Wilson; Susan Engelbrecht; Tania Stander; Tongai Maponga; Wolfgang Preiser<br><br>Dominique Fabien Hill; Faina Wehrli; Lorenz Risch; Martin Risch; Nadia Wohlwend; Sinem Kas; Thomas Bodmer                                                                                                                                                                                                                                                                                                                                                                                                                                                                                                                                                                                                                                                                                                                                                                            |
| EPI_ISL_7062590,<br>EPI_ISL_7506397,<br>EPI_ISL_7506422,<br>EPI_ISL_7506490<br>EPI_ISL_7469070                                                                                                                                                                                                                                                                                                                                                                                                                                                                                                                                                                                                                                                                                                                                                                                                                                                                                                                                                                                                                                                                                                                                                                                                                                                                                                                                                                                                                                                                                                                                                                                                                                                                                                                                                                                                                                                                                                                                                                                                                                                                                                                                                                                                   | Dutch COVID-19 response team<br><br>Dynacare<br>National Health Laboratory Service (NHL), Tygerberg Hospital / Stellenbosch University<br>Dr. Risch Ostschweiz AG                                                                                                                                                                                                                         | Medical Microbiology, Maastricht<br>University Medical Centre<br>National Microbiology Laboratory (NML)<br>Anna Majer; Anneliese Landgraff; CanCOGeN's metadata curation team; Darian Hole; Dynacare Brampton COVID-19 Diagnostic team; Elsie Grudecki; Gary Van Dorpelaar; Gordon Jolly; Grace Seo; Jennifer Tanner; Madison Chapel; Morag Graham; Natalie Knox; Nathalie Bastien; Philip Mabon; Public Health Agency of Canada CanCOGeN team; Rhiannon Huzarewicz; Russell Mandes; Shari Tyson; Timothy Booth; Yan Li      | Brian van der Veer; Carmen Reumkens; Christian Hoebe; Erik Beuken; Jozef Dingemans; Lieke van Alphen; Paul Savelkoul<br><br>Adam Meijer; AnneMarie van den Brandt; Annelies Kroneman; Bas van der Veer; Chantal Reusken; Dennis Schmitz; Dirk Eggink; Florian Zwagemaker; Harry Vennema; Ivo van Wallie; Jeroen Cremer; Jill Kocken; Karim Hajji; Kim Freriks; Linda van Someren; Lisa Wijsman; Lynn Aarts; Rianne Jaarsma; Sanne Bos; Sharon van den Brink; Stijn van Rossum; on behalf of the national COVID-19 response team<br><br>Jason Blanton; Namratha Tarigopula; Sarah Schmedes; Tiffany Splatt                                                                                                                                                                                                                                                                                                                                                                                                      |
| EPI_ISL_6841607, EPI_ISL_6841608, EPI_ISL_6841609, EPI_ISL_6841610, EPI_ISL_6841611, EPI_ISL_6841612, EPI_ISL_6841613, EPI_ISL_6841614, EPI_ISL_6841615, EPI_ISL_6841616, EPI_ISL_6841617, EPI_ISL_6841618, EPI_ISL_6841619, EPI_ISL_7470657, EPI_ISL_7471412, EPI_ISL_7471413, EPI_ISL_7471451, EPI_ISL_7471520, EPI_ISL_7471548, EPI_ISL_7471549, EPI_ISL_7471975                                                                                                                                                                                                                                                                                                                                                                                                                                                                                                                                                                                                                                                                                                                                                                                                                                                                                                                                                                                                                                                                                                                                                                                                                                                                                                                                                                                                                                                                                                                                                                                                                                                                                                                                                                                                                                                                                                                              | Dutch COVID-19 response team<br><br>Dynacare<br>National Health Laboratory Service (NHL), Tygerberg Hospital / Stellenbosch University<br>Dr. Risch Ostschweiz AG                                                                                                                                                                                                                         | National Institute for Public Health and<br>the Environment (RIVM)<br>National Microbiology Laboratory (NML)<br>Anna Majer; Anneliese Landgraff; CanCOGeN's metadata curation team; Darian Hole; Dynacare Brampton COVID-19 Diagnostic team; Elsie Grudecki; Gary Van Dorpelaar; Gordon Jolly; Grace Seo; Jennifer Tanner; Madison Chapel; Morag Graham; Natalie Knox; Nathalie Bastien; Philip Mabon; Public Health Agency of Canada CanCOGeN team; Rhiannon Huzarewicz; Russell Mandes; Shari Tyson; Timothy Booth; Yan Li | Becky Tsai; Benafsh Sagra; Benjamin Rambo-Martin; Christopher Gulvick; Clinton Paden; Dakota Howard; Dhvani Batra; Doreen Ng; Duncan MacCannell; Erisa Sula; Harry Gao; James Xie; Jason Caravas; John Gao; Joseph Fierro; Kristine Lacek; Matthew Schmeider; Mickey Li; Peter Cook; Scott Sammons; Shatavia Morrison; Tymeckia Kendall; Victoria Caban Figueroa; Yan Meng; Yvette Unoarumhi                                                                                                                                                                                                                                                                                                                                                                                                                                                                                                                                                                                                                   |
| EPI_ISL_6971572, EPI_ISL_6989155, EPI_ISL_7248772, EPI_ISL_7248778, EPI_ISL_7248797, EPI_ISL_7248805, EPI_ISL_7248814, EPI_ISL_7248821, EPI_ISL_7470261                                                                                                                                                                                                                                                                                                                                                                                                                                                                                                                                                                                                                                                                                                                                                                                                                                                                                                                                                                                                                                                                                                                                                                                                                                                                                                                                                                                                                                                                                                                                                                                                                                                                                                                                                                                                                                                                                                                                                                                                                                                                                                                                          | see above<br>Furst Medical Laboratory<br>GA Department of Public Health<br>GENEPATH<br>GH A,CHENEVIER-H,MONDOR                                                                                                                                                                                                                                                                            | Norwegian Institute of Public Health,<br>Department of Virology<br>GA Department of Public Health<br>NCL, Pune<br>Department of Virology, Henri Mondor<br>University Hospital, Assistance<br>Publique Hôpitaux de Paris, Université<br>Paris-Est Créteil, INSERM U955                                                                                                                                                                                                                                                        | Atiya R Ali; Debeh Nadia; Engebretsen Serina Beate; Garcia Llorente Ignacio; Hilde Elshaug; Hilde Vollan; Jon Bråte; Kamilla Heddeland Instefjord; Karoline Bragstad; Kathrine Stene-Johansen; Line Victoria Moen; Marie Paulsen Madsen; Olav Hungenes; Pedersen Benedikte Nevjen; Rasmus Riis Kopperud<br><br>Aliyah Fields; Jonathan Edwards; Sharmila Talekar; Stacy Reeves; Taylor Smith; Tonia Parrott<br>Ajinkya Khilari; Anu Raghunathan; Bhagyashree Litkar; Dhanasekaran Shanmugam; Divya Niveditha; Jugul Kanekar; Shikha Takur<br>Alexandre Soulier; Christophe Rodriguez; Elisabeth Trawinski; Guillaume Gricourt; Jean-Michel Pawlitsky; Melissa N'Debi; Slim Fourati; Vanessa Demontant                                                                                                                                                                                                                                                                                                          |
| EPI_ISL_6892613, EPI_ISL_6892620, EPI_ISL_6892631, EPI_ISL_6892639, EPI_ISL_6892644, EPI_ISL_6892650, EPI_ISL_6892653, EPI_ISL_6892659, EPI_ISL_6892661, EPI_ISL_6892665, EPI_ISL_6892674, EPI_ISL_6892683, EPI_ISL_6892693                                                                                                                                                                                                                                                                                                                                                                                                                                                                                                                                                                                                                                                                                                                                                                                                                                                                                                                                                                                                                                                                                                                                                                                                                                                                                                                                                                                                                                                                                                                                                                                                                                                                                                                                                                                                                                                                                                                                                                                                                                                                      |                                                                                                                                                                                                                                                                                                                                                                                           |                                                                                                                                                                                                                                                                                                                                                                                                                                                                                                                              |                                                                                                                                                                                                                                                                                                                                                                                                                                                                                                                                                                                                                                                                                                                                                                                                                                                                                                                                                                                                                |

|                                                                                                                                                                                                                                                                                                                                                                                                                                                                                                                                               |                                                                         |                                                                                                                      |                                                                                                                                                                                                                                                                                                         |
|-----------------------------------------------------------------------------------------------------------------------------------------------------------------------------------------------------------------------------------------------------------------------------------------------------------------------------------------------------------------------------------------------------------------------------------------------------------------------------------------------------------------------------------------------|-------------------------------------------------------------------------|----------------------------------------------------------------------------------------------------------------------|---------------------------------------------------------------------------------------------------------------------------------------------------------------------------------------------------------------------------------------------------------------------------------------------------------|
| see above                                                                                                                                                                                                                                                                                                                                                                                                                                                                                                                                     | Germano de Sousa                                                        | Instituto Nacional de Saude (INSA)                                                                                   | Borges et al                                                                                                                                                                                                                                                                                            |
| EPI_ISL_7545349, EPI_ISL_7545360, EPI_ISL_7545585, EPI_ISL_7596392, EPI_ISL_7596401, EPI_ISL_7596417                                                                                                                                                                                                                                                                                                                                                                                                                                          | Gibraltar Health Authority Lab                                          | Gibraltar Health Authority Covid-19 Laboratory                                                                       | Bruna Martins; Dr Daniel Cassaglia; Dr Martyn Bell; Dr Nicholas Cortes; Dr Zoe Vincent; Sofia Lavelle                                                                                                                                                                                                   |
| EPI_ISL_7549110, EPI_ISL_7549111                                                                                                                                                                                                                                                                                                                                                                                                                                                                                                              | Gravity Diagnostics, LLC                                                | Gravity Diagnostics, LLC                                                                                             | Gravity Diagnostics                                                                                                                                                                                                                                                                                     |
| EPI_ISL_7544692                                                                                                                                                                                                                                                                                                                                                                                                                                                                                                                               | Great Brak River Clinic wbc GBC                                         | NHLS/UCT                                                                                                             | Arash Iranzadeh; Bruna Galvão; Carolyn Williamson; Deelan Doolabh; Diana Hardie; Gert Marais; Innocent Mudau; Luicer Olubayo; Lynn Tyers; Marvin Hsiao; Nokuzola Mbhele; Rageema Joseph; Stephen Korsman                                                                                                |
| EPI_ISL_7543874, EPI_ISL_7544059, EPI_ISL_7544158, EPI_ISL_7544262, EPI_ISL_7544652                                                                                                                                                                                                                                                                                                                                                                                                                                                           | Groote Schuur Hospital wc GSH                                           | NHLS/UCT                                                                                                             | Arash Iranzadeh; Bruna Galvão; Carolyn Williamson; Deelan Doolabh; Diana Hardie; Gert Marais; Innocent Mudau; Luicer Olubayo; Lynn Tyers; Marvin Hsiao; Nokuzola Mbhele; Rageema Joseph; Stephen Korsman                                                                                                |
| EPI_ISL_6913917                                                                                                                                                                                                                                                                                                                                                                                                                                                                                                                               | Grupo CR Diagnosticos                                                   | Instituto Adolfo Lutz Strategic Laboratory                                                                           | Claudio Tavares Sacchi; Karoline Rodrigues Campos                                                                                                                                                                                                                                                       |
| EPI_ISL_6900139, EPI_ISL_6900141, EPI_ISL_6900142, EPI_ISL_6900143                                                                                                                                                                                                                                                                                                                                                                                                                                                                            | HELEN JOSEPH LABORATORY                                                 | National Institute for Communicable Diseases of the National Health Laboratory Service                               | Amoako DG; Bhiman JN; Everatt J; Ismail A; Mahlangu B; Mnguni A; Mohale T; Ntuli N; Scheepers C                                                                                                                                                                                                         |
| EPI_ISL_6698790                                                                                                                                                                                                                                                                                                                                                                                                                                                                                                                               | HOME QUARANTINE TASKFORCE                                               | Hong Kong Department of Health                                                                                       | Alan K.L. Tsang; Edman T.K. Lam; Ken H.L. Ng; Peter C.W. Yip; Rickjason C.W. Chan                                                                                                                                                                                                                       |
| EPI_ISL_7610402                                                                                                                                                                                                                                                                                                                                                                                                                                                                                                                               | HOPITAL SAINT ANDRE                                                     | CNR Virus des Infections Respiratoires - France SUD                                                                  | Antonin Bal; Bruno Lina; Bruno Simon; Gregory Destras; Gwendolynne Burfin; Hadrien Regue; Laurence Josset; Martine Valette; Quentin Semanas                                                                                                                                                             |
| EPI_ISL_7045214, EPI_ISL_7571637, EPI_ISL_7571638                                                                                                                                                                                                                                                                                                                                                                                                                                                                                             | HOSPITAL UNIVERSITARI DE BELLVITGE                                      | Microbiology Department                                                                                              | Aida Gonzalez-Diaz; Anna Carrera-Salinas Yolanda Hernandez; Carmen Ardanuy; Daniel Rodriguez; Jordi Camara; Jordi Nubó; Laura Calatayud; M Angeles Dominguez; Sara Marti; Veronica Saez; Yolanda Hernandez                                                                                              |
| EPI_ISL_7624161, EPI_ISL_7624188, EPI_ISL_7624204, EPI_ISL_7624230, EPI_ISL_7624232                                                                                                                                                                                                                                                                                                                                                                                                                                                           | HOSPITAL UNIVERSITARIO SON ESPASES                                      | HOSPITAL UNIVERSITARIO SON ESPASES                                                                                   | Dr, Antonio Oliver; Dr, Carla López-Causapé; Dr, Gabriel Cabot; Hospital Universitario Son Espases; on behalf of Servicio de Microbiología                                                                                                                                                              |
| EPI_ISL_7565186, EPI_ISL_7565187                                                                                                                                                                                                                                                                                                                                                                                                                                                                                                              | Harvard University                                                      | Infectious Disease Program, Broad Institute of Harvard and MIT                                                       | B.L.; D.J.; Dobbins, S.; K.J.; MacInnis; P.C.; Park; Petros, B.; Sabeti; Siddie; Slack, S.; Springer, M.; Welch, N.                                                                                                                                                                                     |
| EPI_ISL_7470201                                                                                                                                                                                                                                                                                                                                                                                                                                                                                                                               | Haukeland University Hospital, Dept. of Microbiology                    | Norwegian Institute of Public Health, Department of Virology                                                         | Atiya R Ali; Debech Nadia; Engebretsen Serina Beate; Garcia Llorente Ignacio; Hilde Elshaug; Hilde Vollan; Jon Bråte; Kamilla Heddeland Instefjord; Karoline Bragstad; Kathrine Stene-Johansen; Line Victoria Moen; Marie Paulsen Madsen; Olav Hugnnes; Pedersen Benedikte Nevjen; Rasmus Riis Kopperud |
| EPI_ISL_7142185, EPI_ISL_7142260, EPI_ISL_7184579                                                                                                                                                                                                                                                                                                                                                                                                                                                                                             | Health Services Laboratories                                            | Wellcome Sanger Institute for the COVID-19 Genomics UK (COG-UK) Consortium                                           | Cordelia Langford; David K. Jackson; Dominic Kwiatkowski; Ewan Harrison; Health Services Laboratories and Alex Alderton; Ian Johnston; Jeffrey Barrett; John Sillitoe on behalf of the Wellcome Sanger Institute COVID-19 Surveillance Team; Roberto Amato; Sonia Goncalves                             |
| EPI_ISL_7544466                                                                                                                                                                                                                                                                                                                                                                                                                                                                                                                               | Heidelberg Hospital wc HHH                                              | NHLS/UCT                                                                                                             | Arash Iranzadeh; Bruna Galvão; Carolyn Williamson; Deelan Doolabh; Diana Hardie; Gert Marais; Innocent Mudau; Luicer Olubayo; Lynn Tyers; Marvin Hsiao; Nokuzola Mbhele; Rageema Joseph; Stephen Korsman                                                                                                |
| EPI_ISL_7337440, EPI_ISL_7337441, EPI_ISL_7337442, EPI_ISL_7337443, EPI_ISL_7337444, EPI_ISL_7337445, EPI_ISL_7337446, EPI_ISL_7337447, EPI_ISL_7337448, EPI_ISL_7337449, EPI_ISL_7337450, EPI_ISL_7337451, EPI_ISL_7337452, EPI_ISL_7337453, EPI_ISL_7337454, EPI_ISL_7337455, EPI_ISL_7337458, EPI_ISL_7337460, EPI_ISL_7337461, EPI_ISL_7337462                                                                                                                                                                                            | see above                                                               | National Institute for Communicable Diseases of the National Health Laboratory Service                               | Amoako DG; Bhiman JN; Everatt J; Ismail A; Mahlangu B; Mnguni A; Mohale T; Ntuli N; Scheepers C                                                                                                                                                                                                         |
| EPI_ISL_7497723                                                                                                                                                                                                                                                                                                                                                                                                                                                                                                                               | Helix                                                                   | Centers for Disease Control and Prevention Division of Viral Diseases, Pathogen Discovery                            | Benjamin Rambo-Martin; Christopher Gulvick; Clinton Paden; Dakota Howard; Dhvani Batra; Duncan MacCannell; Erisa Sula; Helix CA; Jason Caravas; Kristine Lacey; Matthew Schmerer; Peter Cook; Scott Sammons; Shatavia Morrison; Tymeckia Kendall; Victoria Caban Figueroa; Yvette Unoarumhi             |
| EPI_ISL_7265236, EPI_ISL_7265237, EPI_ISL_7462215, EPI_ISL_7620968, EPI_ISL_7620969, EPI_ISL_7620970, EPI_ISL_7620971, EPI_ISL_7620972, EPI_ISL_7620973, EPI_ISL_7620977, EPI_ISL_7621010, EPI_ISL_7621011, EPI_ISL_7621210, EPI_ISL_7621349, EPI_ISL_7621350, EPI_ISL_7621351, EPI_ISL_7621352, EPI_ISL_7621353, EPI_ISL_7621907, EPI_ISL_7621908, EPI_ISL_7621909, EPI_ISL_7621910, EPI_ISL_7621914, EPI_ISL_7621915, EPI_ISL_7621916, EPI_ISL_7621917                                                                                      | see above                                                               | NSW Health Pathology - Institute of Clinical Pathology and Medical Research; Westmead Hospital; University of Sydney | Arnott A.; Draper J.; Gall M.; Martinez E.; Rockett R.; Sintchenko V.; on behalf of ICPMR                                                                                                                                                                                                               |
| EPI_ISL_6590782, EPI_ISL_6832108                                                                                                                                                                                                                                                                                                                                                                                                                                                                                                              | Home Quarantine Taskforce                                               | Hong Kong Department of Health                                                                                       | Alan K.L. Tsang; Edman T.K. Lam; Ken H.L. Ng; Peter C.W. Yip; Rickjason C.W. Chan                                                                                                                                                                                                                       |
| EPI_ISL_6716890, EPI_ISL_6716902                                                                                                                                                                                                                                                                                                                                                                                                                                                                                                              | Hong Kong Department of Health                                          | School of Public Health, The University of Hong Kong                                                                 | Dominic N.C. Tsang; Haogao Gu; Leo L.M. Poon; Malik Peiris                                                                                                                                                                                                                                              |
| EPI_ISL_7373061, EPI_ISL_7373165, EPI_ISL_7373230                                                                                                                                                                                                                                                                                                                                                                                                                                                                                             | Hospital General Universitario Albacete                                 | Hospital General Universitario Albacete                                                                              | Caridad Sainz de Baranda Camino; Lorena Robles-Fonseca                                                                                                                                                                                                                                                  |
| EPI_ISL_6851526, EPI_ISL_6902675, EPI_ISL_6971860, EPI_ISL_7042252, EPI_ISL_7604642, EPI_ISL_7604643, EPI_ISL_7604644, EPI_ISL_7604645, EPI_ISL_7604646, EPI_ISL_7604647, EPI_ISL_7604648, EPI_ISL_7604649, EPI_ISL_7604652, EPI_ISL_7604653, EPI_ISL_7604654, EPI_ISL_7604659, EPI_ISL_7604693, EPI_ISL_7604694, EPI_ISL_7604695, EPI_ISL_7604696, EPI_ISL_7604715                                                                                                                                                                           | see above                                                               | Hospital General Universitario Gregorio Marañón                                                                      | Cristina Rodriguez-Grande; Dario Garcia de Viedma; Jorge Rodríguez-Grande; Julia Suárez; Laura Pérez-Lago; Marta Herranz Martin; Patricia Muñoz; Pedro Sola Campoy; Pilar Catalán; Sergio Buenestado Serrano; Víctor Manuel de la Cueva                                                                 |
| EPI_ISL_7571377, EPI_ISL_7571378, EPI_ISL_7571388, EPI_ISL_7571389                                                                                                                                                                                                                                                                                                                                                                                                                                                                            | Hospital General Universitario de Ciudad Real                           | Hospital General Universitario de Ciudad Real                                                                        | Cristina Colmenarejo; José Martínez-Alarcón; Lidia García-Agudo; Marta Torres-Narbona; Soledad Illescas Fernández-Bermejo                                                                                                                                                                               |
| EPI_ISL_7204336                                                                                                                                                                                                                                                                                                                                                                                                                                                                                                                               | Hospital Universitari Dr. Josep Trueta                                  | Institut d'Investigació Biomèdica de Girona   Hospital Universitari Dr. Josep Trueta                                 | Bernat del Olmo; Mel-lina Pinsach; Meritxell Deulofeu; Nuria Esther Neto; Paula Costa                                                                                                                                                                                                                   |
| EPI_ISL_7598538                                                                                                                                                                                                                                                                                                                                                                                                                                                                                                                               | Hospital Universitari Joan XXIII de Tarragona                           | Hospital Universitari Vall d'Hebron - Vall d'Hebron Institut de Recerca                                              | Alejandra González-Sánchez; Andrés Antón; Ariadna Rando; Carla Castillo; Cristina Andrés; Damir García-Cehic; Jose Quer; Juliana Esperalba; Karen García; Maria Carmen Martin; Maria Gema Codina; Maria Piñana; Rodrigo Vázquez; Tomás Pumarola                                                         |
| EPI_ISL_7050911, EPI_ISL_7050918, EPI_ISL_7406515, EPI_ISL_7598503, EPI_ISL_7598554, EPI_ISL_7598569                                                                                                                                                                                                                                                                                                                                                                                                                                          | Hospital Universitari Vall d'Hebron - Vall d'Hebron Institut de Recerca | Hospital Universitari Vall d'Hebron - Vall d'Hebron Institut de Recerca                                              | Alejandra González-Sánchez; Andrés Antón; Ariadna Rando; Carla Castillo; Cristina Andrés; Damir García-Cehic; Jose Quer; Juliana Esperalba; Karen García; Maria Carmen Martin; Maria Gema Codina; Maria Piñana; Rodrigo Vázquez; Tomás Pumarola                                                         |
| EPI_ISL_7277268, EPI_ISL_7329633                                                                                                                                                                                                                                                                                                                                                                                                                                                                                                              | Hospital Universitario Son Espases                                      | Hospital Universitario Son Espases                                                                                   | Dr. Antonio Oliver; Dr, Carla López-Causapé; Dr, Gabriel Cabot; Hospital Universitario Son Espases; on behalf of Servicio de Microbiología                                                                                                                                                              |
| EPI_ISL_7156454                                                                                                                                                                                                                                                                                                                                                                                                                                                                                                                               | Hospital Angeles Lomas                                                  | Hospital General Universitario de Ciudad Real                                                                        | Cristina Colmenarejo; José Martínez-Alarcón; Lidia García-Agudo; Marta Torres-Narbona; Soledad Illescas Fernández-Bermejo                                                                                                                                                                               |
| EPI_ISL_7599319                                                                                                                                                                                                                                                                                                                                                                                                                                                                                                                               | Houston Health Dept.                                                    | Houston Health Dept.                                                                                                 | Adolfo Lara; Pamela Brown; Ryker Penn; Yantai Lai                                                                                                                                                                                                                                                       |
| EPI_ISL_7415721, EPI_ISL_7415723, EPI_ISL_7415731, EPI_ISL_7415752, EPI_ISL_7415767, EPI_ISL_7415770, EPI_ISL_7415774, EPI_ISL_7415830, EPI_ISL_7415887, EPI_ISL_7602881, EPI_ISL_7602890, EPI_ISL_7602896, EPI_ISL_7603271, EPI_ISL_7603282, EPI_ISL_7603681, EPI_ISL_7603695, EPI_ISL_7603810, EPI_ISL_7603844, EPI_ISL_7603977, EPI_ISL_7604046, EPI_ISL_7604065, EPI_ISL_7604211, EPI_ISL_7604216, EPI_ISL_7604217, EPI_ISL_7604227, EPI_ISL_7604250, EPI_ISL_7604285, EPI_ISL_7604367, EPI_ISL_7604480, EPI_ISL_7604505, EPI_ISL_7612854 | see above                                                               | Houston Methodist Hospital                                                                                           | Ilya J. Finkelstein; James J. Davis; Jessica Cambric; Jimmy Gollihar; Kristina Reppond; Layne Pruitt; Madison N. Shyer; Marcus Nguyen; Matthew Ojeda Saavedra; Paul A. Christensen; Prasanti Yerramilli; Randall J. Olsen; Robert Olson; Ryan Gadd; S. Wesley Long; Sishir Subedi; and James M. Musser  |
| EPI_ISL_7210427, EPI_ISL_7635857                                                                                                                                                                                                                                                                                                                                                                                                                                                                                                              | Hrvatski zavod za javno zdravstvo                                       | Hrvatski zavod za javno zdravstvo                                                                                    | Anita Jurić; Dragan Jurić; Irena Tabain; Ivana Ferencák; Josipa Kuzle; Ljiljana Žmak; Mihaela Obrovac                                                                                                                                                                                                   |
| EPI_ISL_7154340, EPI_ISL_7156753, EPI_ISL_7308635, EPI_ISL_7308771, EPI_ISL_7308875, EPI_ISL_7381064, EPI_ISL_7552474, EPI_ISL_7552479, EPI_ISL_7552666, EPI_ISL_7552686, EPI_ISL_7552693, EPI_ISL_7602123, EPI_ISL_7602445, EPI_ISL_7602500, EPI_ISL_7602605, EPI_ISL_7602741, EPI_ISL_7602776, EPI_ISL_7602813                                                                                                                                                                                                                              | see above                                                               | IHU Mediterranee Infection                                                                                           | Philippe Colson et al.                                                                                                                                                                                                                                                                                  |
| EPI_ISL_7439547, EPI_ISL_7439558, EPI_ISL_7439622, EPI_ISL_7439646, EPI_ISL_7439650, EPI_ISL_7439657, EPI_ISL_7439722, EPI_ISL_7439730, EPI_ISL_7439754, EPI_ISL_7439781, EPI_ISL_7439806, EPI_ISL_7439827, EPI_ISL_7439832, EPI_ISL_7439902, EPI_ISL_7439935                                                                                                                                                                                                                                                                                 | see above                                                               | IHU Mediterranee Infection                                                                                           |                                                                                                                                                                                                                                                                                                         |



|                                                                                                                                                                                                                                                                                                                                                                                                                                                                                                             |                                                                                                              |                                                                                                              |                                                                                                                                                                                                                                                                                                                                                                               |
|-------------------------------------------------------------------------------------------------------------------------------------------------------------------------------------------------------------------------------------------------------------------------------------------------------------------------------------------------------------------------------------------------------------------------------------------------------------------------------------------------------------|--------------------------------------------------------------------------------------------------------------|--------------------------------------------------------------------------------------------------------------|-------------------------------------------------------------------------------------------------------------------------------------------------------------------------------------------------------------------------------------------------------------------------------------------------------------------------------------------------------------------------------|
| see above                                                                                                                                                                                                                                                                                                                                                                                                                                                                                                   | IMD - MVZ Labor Martinsried                                                                                  | Robert Koch Institute                                                                                        |                                                                                                                                                                                                                                                                                                                                                                               |
| EPI_ISL_7451030, EPI_ISL_7451040, EPI_ISL_7451054, EPI_ISL_7451096, EPI_ISL_7565411                                                                                                                                                                                                                                                                                                                                                                                                                         | INSA                                                                                                         | Instituto Nacional de Saude (INSA)                                                                           | Borges et al                                                                                                                                                                                                                                                                                                                                                                  |
| EPI_ISL_7496734                                                                                                                                                                                                                                                                                                                                                                                                                                                                                             | Idaho Bureau of Laboratories                                                                                 | Idaho Bureau of Laboratories                                                                                 | "R. Beukelman; Aimee Ceniseros; Christian Loera; Christopher Ball"; Matthew Charles Burns; Robert L. Voermans                                                                                                                                                                                                                                                                 |
| EPI_ISL_7544430                                                                                                                                                                                                                                                                                                                                                                                                                                                                                             | Ikhwezi CDC w/ IKW                                                                                           | NHLS/UCT                                                                                                     | Arash Iranzadeh; Bruna Galvao; Carolyn Williamson; Deelan Doolabh; Diana Hardie; Gert Marais; Innocent Mudau; Luicer Olubayo; Lynn Tyers; Marvin Hsiao; Nokuzola Mbhele; Rageema Joseph; Stephen Korsman                                                                                                                                                                      |
| EPI_ISL_7381102                                                                                                                                                                                                                                                                                                                                                                                                                                                                                             | Indian Council of Medical Research- National Institute of Virology, Microbial Containment Complex            | Indian Council of Medical Research- National Institute of Virology, Microbial Containment Complex            | Pragya D. Yadav                                                                                                                                                                                                                                                                                                                                                               |
| EPI_ISL_7166400                                                                                                                                                                                                                                                                                                                                                                                                                                                                                             | Indira Gandhi Memorial Hospital                                                                              | Indira Gandhi Memorial Hospital                                                                              | D, Fathmath Nazla Rafeeq; Dr, Ibrahim Afzal; Mr, Ibrahim Nishan Ahmed; Ms, Aishath Shuhudha; Ms, Aminath Shazleena Abdul Rahman                                                                                                                                                                                                                                               |
| EPI_ISL_7607424                                                                                                                                                                                                                                                                                                                                                                                                                                                                                             | Infectious Disease Diagnostics Laboratory at the Children's Hospital of Philadelphia                         | Planet Lab, Children's Hospital of Philadelphia                                                              | Ahmed M. Moustafa; Alex Arvanitis; Andries Feder; Azad Ahmed; Bhaswati Sen; Donald C. Hall; Joshua Chang Mell; Paul J. Planet; Rebecca M. Harris; Swetha Rajagopal; Will Dampier                                                                                                                                                                                              |
| EPI_ISL_7497749                                                                                                                                                                                                                                                                                                                                                                                                                                                                                             | Infinity Biologix                                                                                            | Centers for Disease Control and Prevention Division of Viral Diseases, Pathogen Discovery                    | Benjamin Rambo-Martin; Chirayu Goswami; Christian Bixby; Christopher Gulvick; Clinton Paden; Dakota Howard; Dhvani Batra; Duncan MacCannell; Erisa Sula; Jason Caravass; Jonathan Schultz; Kristine Lacek; Matthew Schmerer; Peter Cook; Robin Grimwood; Russ Hager; Scott Sammons; Shatavia Morrison; Tymeckia Kendall; Victoria Caban Figueroa; Yihe Wang; Yvette Unoarumhi |
| EPI_ISL_7405329                                                                                                                                                                                                                                                                                                                                                                                                                                                                                             | InselSpital Bern (Covid-Track)                                                                               | Institute for Infectious Diseases, University of Bern                                                        | Alban Ramette; Christian Baumann; Cora Sägesser; Franziska Suter-Riniker; Loïc Borcard; Miguel A Terrazos Miani; Nicole Liechti; Pascal Bittel; Peter Keller; Sonja Gempeler; Stefan Neuwenschwander; Stephen L Leib                                                                                                                                                          |
| EPI_ISL_7117396                                                                                                                                                                                                                                                                                                                                                                                                                                                                                             | Institut für Labormedizin Mikrobiologie und Hygiene                                                          | Robert Koch Institute                                                                                        |                                                                                                                                                                                                                                                                                                                                                                               |
| EPI_ISL_6832737                                                                                                                                                                                                                                                                                                                                                                                                                                                                                             | Institute for Medical Virology Frankfurt                                                                     | Institute for Medical Virology Frankfurt                                                                     | Ciesek S.; Toptan T.                                                                                                                                                                                                                                                                                                                                                          |
| EPI_ISL_6959868, EPI_ISL_6959869, EPI_ISL_6959870, EPI_ISL_6959871, EPI_ISL_6959872, EPI_ISL_6959873, EPI_ISL_6959874, EPI_ISL_7479163, EPI_ISL_7479173, EPI_ISL_7479181, EPI_ISL_7479186, EPI_ISL_7479193, EPI_ISL_7479200, EPI_ISL_7479206                                                                                                                                                                                                                                                                | Institute for Medical Virology, Frankfurt                                                                    | Institute for Medical Virology, Frankfurt                                                                    | Ciesek S.; Toptan T.                                                                                                                                                                                                                                                                                                                                                          |
| see above                                                                                                                                                                                                                                                                                                                                                                                                                                                                                                   |                                                                                                              |                                                                                                              |                                                                                                                                                                                                                                                                                                                                                                               |
| EPI_ISL_7404462, EPI_ISL_7404463                                                                                                                                                                                                                                                                                                                                                                                                                                                                            | Institute of Epidemiology, Disease Control and Research (IEDCR)                                              | IEDCR-ideSHi Genomics Lab                                                                                    | Firdausi Qadri; Hassan Afrad; Manjur Hossain Khan; Omar Hamza; Tahmina Shirin                                                                                                                                                                                                                                                                                                 |
| EPI_ISL_7507055                                                                                                                                                                                                                                                                                                                                                                                                                                                                                             | Institute of Medical Science, University of Tokyo                                                            | Center for Influenza and Respiratory Virus Research, National Institute of Infectious Diseases (NIID)        | Emi Takashita; Hideka Miura; Seichiro Fujisaki; Yoshihiro Kawaoka; Yuko Sakai-Tagawa                                                                                                                                                                                                                                                                                          |
| EPI_ISL_6825546, EPI_ISL_6902052, EPI_ISL_6902053                                                                                                                                                                                                                                                                                                                                                                                                                                                           | Institute of Virology, Department of Hygiene, Microbiology and Public Health at Innsbruck Medical University | Institute of Virology, Department of Hygiene, Microbiology and Public Health at Innsbruck Medical University | Andreas Aufschnaiter; Barbara Falkensammer; David Bante; Dorothee von Laer; Heribert Stoiber; Lukas Perro; Stephan Amstler; Wegene Borena                                                                                                                                                                                                                                     |
| EPI_ISL_7550075                                                                                                                                                                                                                                                                                                                                                                                                                                                                                             | Instituto Adolfo Lutz - Regional de Rio Claro                                                                | Instituto Adolfo Lutz, Interdisciplinary Procedures Center, Strategic Laboratory                             | Claudio Tavares Sacchi; Karoline Rodrigues Campos                                                                                                                                                                                                                                                                                                                             |
| EPI_ISL_7632052                                                                                                                                                                                                                                                                                                                                                                                                                                                                                             | Invenimus AG                                                                                                 | Institute of Medical Virology, University of Zurich                                                          | Alexandra Trkola; Annette Audigé; Catharine Aquino; Cyril Shah; Daniel Ehrsam; Gabriela Ziltener; Guido Bloemberg; Hubert Rehrauer; Isabel Stürmer; Joel Wirz; Jon Huder; Jörg Böni; Kevin Steiner; Maria Grünberg; Maryam Zaheri; Michael Huber; Riccarda Capaul; Stefan Schmutz; Verena Kufner; Weihong Qi                                                                  |
| EPI_ISL_7400617, EPI_ISL_7571605, EPI_ISL_7571606, EPI_ISL_7571607, EPI_ISL_7571608, EPI_ISL_7571612, EPI_ISL_7571614                                                                                                                                                                                                                                                                                                                                                                                       | Iressel Genomics lab                                                                                         | IRÉSSEF                                                                                                      | Abdou PADANE; Ambroise AHOUIDI; Aminata DIA; Aminata MBOUP; Astou Gaye GAYE; Barada CISSE; Bراهيم Piere NDIAYE; Cyrille Diedhiou; Diabou Diagne; Gora LO; Khadim GUEYE; Moustapha MBOW; Nafisatou LEYE; Ndeye Coumba Toure KANE; Papa Alassane DIAW; Samba Ndiour; Seni Ndiaye; Souleymane MBOUP; Yacine DIA                                                                  |
| see above                                                                                                                                                                                                                                                                                                                                                                                                                                                                                                   |                                                                                                              |                                                                                                              |                                                                                                                                                                                                                                                                                                                                                                               |
| EPI_ISL_7160424                                                                                                                                                                                                                                                                                                                                                                                                                                                                                             | Johns Hopkins Hospital Department of Pathology                                                               | Johns Hopkins Hospital Department of Pathology                                                               | Amary Fall; C. Paul Morris; David Gaston; Heba H. Mostafa; Julie M. Norton; Matthew Schwartz; Michael Forman; Raghdah Eldesouki                                                                                                                                                                                                                                               |
| EPI_ISL_7605595, EPI_ISL_7605596, EPI_ISL_7605597, EPI_ISL_7605598, EPI_ISL_7605599, EPI_ISL_7605600, EPI_ISL_7605601, EPI_ISL_7605617, EPI_ISL_7605618, EPI_ISL_7605619, EPI_ISL_7605622, EPI_ISL_7605641, EPI_ISL_7605642, EPI_ISL_7605643, EPI_ISL_7605644, EPI_ISL_7605645, EPI_ISL_7605646, EPI_ISL_7605647, EPI_ISL_7605648, EPI_ISL_7605649, EPI_ISL_7605650, EPI_ISL_7605680, EPI_ISL_7605681, EPI_ISL_7605683, EPI_ISL_7605686, EPI_ISL_7605690, EPI_ISL_7605706, EPI_ISL_7605707, EPI_ISL_7605741 | KIMBERLEY LABORATORY                                                                                         | National Institute for Communicable Diseases of the National Health Laboratory Service                       |                                                                                                                                                                                                                                                                                                                                                                               |
| see above                                                                                                                                                                                                                                                                                                                                                                                                                                                                                                   |                                                                                                              |                                                                                                              |                                                                                                                                                                                                                                                                                                                                                                               |
| EPI_ISL_6794907, EPI_ISL_6989250, EPI_ISL_7413964, EPI_ISL_7495278, EPI_ISL_7495279, EPI_ISL_7495280, EPI_ISL_7495281, EPI_ISL_7495282, EPI_ISL_7495283, EPI_ISL_7495284, EPI_ISL_7495285                                                                                                                                                                                                                                                                                                                   | KU Leuven, Rega Institute, Clinical and Epidemiological Virology                                             | KU Leuven, Rega Institute, Clinical and Epidemiological Virology                                             | Bert Vanmechelen; Casper Geenen; Emmanuel André; Guy Baetle; Joan Martí-Carerras; Joren; Lize Cuypers; Piet Maes; Raymenants; Sarah Gorissen; Simon Dellicour; Tony Wawina-Bokalanga                                                                                                                                                                                          |
| EPI_ISL_7622272, EPI_ISL_7622286, EPI_ISL_7622287                                                                                                                                                                                                                                                                                                                                                                                                                                                           | Kaiser Permanente NW Reginal Lab                                                                             | OHSU MM Lab                                                                                                  | Amber Halse; Jeannine Lama; Xuan Qin; Yun Wu                                                                                                                                                                                                                                                                                                                                  |
| EPI_ISL_7219990, EPI_ISL_7220437, EPI_ISL_7220444, EPI_ISL_7286284                                                                                                                                                                                                                                                                                                                                                                                                                                          | Karolinska University Hospital Huddinge                                                                      | Karolinska University Hospital Huddinge                                                                      | Annika Tiveljung Lindell; Henning Onsrbing; Jan Albert; Karina Hentrich; Lynda Eneh; Maria Ropat; Martin Ekman; Natalija Gerasimcik; Robert Dyrdak; Sandra Broddesson; Shambhu Ganeshappa Aralaguppe; Tanja Normark; Tobias Allander; Valtteri Wirta; Zhibing Yun                                                                                                             |
| EPI_ISL_7381109, EPI_ISL_7381114, EPI_ISL_7457425, EPI_ISL_7457426                                                                                                                                                                                                                                                                                                                                                                                                                                          | Karolinska University Hospital Solna                                                                         | Karolinska University Hospital Huddinge                                                                      | Annika Tiveljung Lindell; Henning Onsrbing; Jan Albert; Karina Hentrich; Lynda Eneh; Maria Ropat; Martin Ekman; Natalija Gerasimcik; Robert Dyrdak; Sandra Broddesson; Shambhu Ganeshappa Aralaguppe; Tanja Normark; Tobias Allander; Valtteri Wirta; Zhibing Yun                                                                                                             |
| EPI_ISL_7433816, EPI_ISL_7443687, EPI_ISL_7443713                                                                                                                                                                                                                                                                                                                                                                                                                                                           | Klinikum Ernst von Bergmann gemeinnützige GmbH - stationärer Bereich                                         | Robert Koch Institute                                                                                        |                                                                                                                                                                                                                                                                                                                                                                               |
| EPI_ISL_7611152                                                                                                                                                                                                                                                                                                                                                                                                                                                                                             | LABORATOIRE BIOALLIANCE                                                                                      | CNR Virus des Infections Respiratoires - France SUD                                                          | Antonin Bat, Bruno Lina; Bruno Simon; Gregory Destras; Gwendolynne Burfin; Hadrien Regue; Laurence Josset; Martine Valette; Quentin Semanas                                                                                                                                                                                                                                   |
| EPI_ISL_7224971                                                                                                                                                                                                                                                                                                                                                                                                                                                                                             | LACEN do Distrito Federal                                                                                    | Instituto Adolfo Lutz Strategic Laboratory                                                                   | Claudio Tavares Sacchi; Karoline Rodrigues Campos; Marlon Benedito Nascimento Santos                                                                                                                                                                                                                                                                                          |
| EPI_ISL_7550076                                                                                                                                                                                                                                                                                                                                                                                                                                                                                             | LACEN do Distrito Federal                                                                                    | Instituto Adolfo Lutz, Interdisciplinary Procedures Center, Strategic Laboratory                             | Claudio Tavares Sacchi; Karoline Rodrigues Campos                                                                                                                                                                                                                                                                                                                             |
| EPI_ISL_7610177                                                                                                                                                                                                                                                                                                                                                                                                                                                                                             | LAM CERBALLIANCE                                                                                             | CNR Virus des Infections Respiratoires - France SUD                                                          | Antonin Bat, Bruno Lina; Bruno Simon; Gregory Destras; Gwendolynne Burfin; Hadrien Regue; Laurence Josset; Martine Valette; Quentin Semanas                                                                                                                                                                                                                                   |
| EPI_ISL_6647956, EPI_ISL_6647957, EPI_ISL_6647958, EPI_ISL_6647959, EPI_ISL_6647960, EPI_ISL_6647961, EPI_ISL_6647962, EPI_ISL_6698792, EPI_ISL_6704863, EPI_ISL_6704864, EPI_ISL_6704865, EPI_ISL_6704866, EPI_ISL_6704867, EPI_ISL_6704868, EPI_ISL_6704869, EPI_ISL_6704870, EPI_ISL_6704871, EPI_ISL_6704872, EPI_ISL_6704873, EPI_ISL_6704874, EPI_ISL_6704875, EPI_ISL_6704876                                                                                                                        | LANCET LABORATORY                                                                                            | National Institute for Communicable Diseases of the National Health Laboratory Service                       | Amoako DG; Bhiman JN; Everatt J; Glass A; Ismail A; Mahlangu B; Mnguni A; Mohale T; Ntuli N; Scheepers C; Viana R; Wolter N                                                                                                                                                                                                                                                   |
| see above                                                                                                                                                                                                                                                                                                                                                                                                                                                                                                   |                                                                                                              |                                                                                                              |                                                                                                                                                                                                                                                                                                                                                                               |
| EPI_ISL_6901960, EPI_ISL_6901961, EPI_ISL_7473154                                                                                                                                                                                                                                                                                                                                                                                                                                                           | LATE - Laboratório de Técnicas Especiais - Hospital Israelita Albert Einstein                                | LATE - Laboratório de Técnicas Especiais - Hospital Israelita Albert Einstein                                | Alexandre Hideaki Takara; Ana Paula Moreira Salles; Anelisse da Silva Santos; Deyvid Amgarten; Erick Gustavo Dorlacs; Fernanda de Mello Malta; João Renato Rebello Pinho; Luiz Vicente Rizzo; Marcio Anunciacao Menezes; Pedro Henrique Sebe Rodrigues; Raquel Riyuzo                                                                                                         |
| EPI_ISL_7472277                                                                                                                                                                                                                                                                                                                                                                                                                                                                                             | LKO                                                                                                          | Jessa                                                                                                        | Severine Berden et al. on behalf of the Jessa_cmdLab                                                                                                                                                                                                                                                                                                                          |
| EPI_ISL_7456529                                                                                                                                                                                                                                                                                                                                                                                                                                                                                             | LSUHS Emerging Viral Threat Lab                                                                              | LSUHS Emerging Viral Threat Laboratory                                                                       | Adrian Almodovar; Alexander Mijalis; Andrew D. Yurochko; Christopher G. Kevil; Gregory L. Ware; Jennifer L. Carroll; Jeremy P. Kamil; John A. Vanchiere; Krista Queen; Maarten Van Diest; Rona S. Scott                                                                                                                                                                       |
| EPI_ISL_7339434, EPI_ISL_7339435, EPI_ISL_7339436                                                                                                                                                                                                                                                                                                                                                                                                                                                           | Lab voor klinische biologie                                                                                  | Lab voor klinische biologie                                                                                  | Bruno Verhasselt; Hanneklere Hamerlinck; Marija Janevska; May-Linh Truong                                                                                                                                                                                                                                                                                                     |
| EPI_ISL_7589521                                                                                                                                                                                                                                                                                                                                                                                                                                                                                             | Labo Analyses Med                                                                                            | National Reference Center for Viruses of Respiratory Infections, Institut                                    | Angela Brisebarre; Camille Capet; Christophe Malabat; Corinne Maufrais; Etienne Simon-Lorière; Frédéric Lemoine; Julien Fumey; Louise Lefrançois; Marion Barbet; Maud Vanpeene; Méline Bizard; Philippe GIRARD; Slim El Khari; Sylvie Behilli; Sylvie Van der Werf; Vincent Enouf                                                                                             |

|                                                                                                                                                                                                                                                                                                                                                                                                                                                                                                                                                                                                                                                                                                                                                                                                                                                                                                                                                                                                                                                                                                                                                                                                                                                                                                                                                                                                                                                                                                                                                                                                                                                                                                                                                                                                                                                                                                                                                                                                                                                                                                                                                                                                                                                                                                                                                                                                                                                                                                                                                                                                                                                                                                                                                                                                                                                                                                                                                                                                                                                                                                                                                                                                                                                                                                                                                                                                                                                                                                                                                                                                                                                                                                                                                                                                                                                                                                                                                                                                                                                                                                                                                                                                                                                                                                                                                                                                                                                                                                                                                                                                                                                                                                                                                                                                                                                                                                                                                                                                                                                                                                                                                                                                                                                                                                                                                                                                                                                                                                                                                                                                                                                                                                                                                                                                                                                                                                                                                                                                                                                                                                                                                                                                                                                                                                                                                                                                                                                                                                                                                                                                                                                                                                                                                                                                                                                                                                                                                                                                                                                                                                                                                                                                                                                                                                                                                                                                                                                                                                                                                                                                                                                                                                                                                                                                                                                                                                                                                                                                                                                                                                                                                                                                                                                                                                                                                                                                                                                                                                                                                                                                                                                                                                                                                                                                                                                                                                                                                                                                                                                                                                                                                                                                                                                                                                                                                                                                                                                                                                                                                                                                                                                                                                                                                                                                                                                                                                                                                                                                                                                                                                                                                                                                                                                                                                                                                                                                                                                                                                                                                                                                                                                                                                                                                                                                                                                                                                                                                                                                                                                                                                                                                                                                                                                                                                                                                                                                                                                                                                                                                                                                                                                                                                                                                                                                                                                                                                                                                                                                                                                                                                                                                                                                                                                                                                                                                                                                                                                                                                                                                                                                                                                                                                                                                                                                                                                                                                                                                                                                                                                                                                                                                                                                                                                                                                                                                                                                                                                                                                                                                                                                                                                                                                                                                                                                                                                                                                                                                                                                                                                                                                                      |                                                                                                              |                                                                                                                      |                                                                                                                                                                                                                                                                                                                                                                                                                                                                                                                                                                                                                                                                                                                                                                                                                                                                                                                                                                                                                                                              |
|----------------------------------------------------------------------------------------------------------------------------------------------------------------------------------------------------------------------------------------------------------------------------------------------------------------------------------------------------------------------------------------------------------------------------------------------------------------------------------------------------------------------------------------------------------------------------------------------------------------------------------------------------------------------------------------------------------------------------------------------------------------------------------------------------------------------------------------------------------------------------------------------------------------------------------------------------------------------------------------------------------------------------------------------------------------------------------------------------------------------------------------------------------------------------------------------------------------------------------------------------------------------------------------------------------------------------------------------------------------------------------------------------------------------------------------------------------------------------------------------------------------------------------------------------------------------------------------------------------------------------------------------------------------------------------------------------------------------------------------------------------------------------------------------------------------------------------------------------------------------------------------------------------------------------------------------------------------------------------------------------------------------------------------------------------------------------------------------------------------------------------------------------------------------------------------------------------------------------------------------------------------------------------------------------------------------------------------------------------------------------------------------------------------------------------------------------------------------------------------------------------------------------------------------------------------------------------------------------------------------------------------------------------------------------------------------------------------------------------------------------------------------------------------------------------------------------------------------------------------------------------------------------------------------------------------------------------------------------------------------------------------------------------------------------------------------------------------------------------------------------------------------------------------------------------------------------------------------------------------------------------------------------------------------------------------------------------------------------------------------------------------------------------------------------------------------------------------------------------------------------------------------------------------------------------------------------------------------------------------------------------------------------------------------------------------------------------------------------------------------------------------------------------------------------------------------------------------------------------------------------------------------------------------------------------------------------------------------------------------------------------------------------------------------------------------------------------------------------------------------------------------------------------------------------------------------------------------------------------------------------------------------------------------------------------------------------------------------------------------------------------------------------------------------------------------------------------------------------------------------------------------------------------------------------------------------------------------------------------------------------------------------------------------------------------------------------------------------------------------------------------------------------------------------------------------------------------------------------------------------------------------------------------------------------------------------------------------------------------------------------------------------------------------------------------------------------------------------------------------------------------------------------------------------------------------------------------------------------------------------------------------------------------------------------------------------------------------------------------------------------------------------------------------------------------------------------------------------------------------------------------------------------------------------------------------------------------------------------------------------------------------------------------------------------------------------------------------------------------------------------------------------------------------------------------------------------------------------------------------------------------------------------------------------------------------------------------------------------------------------------------------------------------------------------------------------------------------------------------------------------------------------------------------------------------------------------------------------------------------------------------------------------------------------------------------------------------------------------------------------------------------------------------------------------------------------------------------------------------------------------------------------------------------------------------------------------------------------------------------------------------------------------------------------------------------------------------------------------------------------------------------------------------------------------------------------------------------------------------------------------------------------------------------------------------------------------------------------------------------------------------------------------------------------------------------------------------------------------------------------------------------------------------------------------------------------------------------------------------------------------------------------------------------------------------------------------------------------------------------------------------------------------------------------------------------------------------------------------------------------------------------------------------------------------------------------------------------------------------------------------------------------------------------------------------------------------------------------------------------------------------------------------------------------------------------------------------------------------------------------------------------------------------------------------------------------------------------------------------------------------------------------------------------------------------------------------------------------------------------------------------------------------------------------------------------------------------------------------------------------------------------------------------------------------------------------------------------------------------------------------------------------------------------------------------------------------------------------------------------------------------------------------------------------------------------------------------------------------------------------------------------------------------------------------------------------------------------------------------------------------------------------------------------------------------------------------------------------------------------------------------------------------------------------------------------------------------------------------------------------------------------------------------------------------------------------------------------------------------------------------------------------------------------------------------------------------------------------------------------------------------------------------------------------------------------------------------------------------------------------------------------------------------------------------------------------------------------------------------------------------------------------------------------------------------------------------------------------------------------------------------------------------------------------------------------------------------------------------------------------------------------------------------------------------------------------------------------------------------------------------------------------------------------------------------------------------------------------------------------------------------------------------------------------------------------------------------------------------------------------------------------------------------------------------------------------------------------------------------------------------------------------------------------------------------------------------------------------------------------------------------------------------------------------------------------------------------------------------------------------------------------------------------------------------------------------------------------------------------------------------------------------------------------------------------------------------------------------------------------------------------------------------------------------------------------------------------------------------------------------------------------------------------------------------------------------------------------------------------------------------------------------------------------------------------------------------------------------------------------------------------------------------------------------------------------------------------------------------------------------------------------------------------------------------------------------------------------------------------------------------------------------------------------------------------------------------------------------------------------------------------------------------------------------------------------------------------------------------------------------------------------------------------------------------------------------------------------------------------------------------------------------------------------------------------------------------------------------------------------------------------------------------------------------------------------------------------------------------------------------------------------------------------------------------------------------------------------------------------------------------------------------------------------------------------------------------------------------------------------------------------------------------------------------------------------------------------------------------------------------------------------------------------------------------------------------------------------------------------------------------------------------------------------------------------------------------------------------------------------------------------------------------------------------------------------------------------------------------------------------------------------------------------------------------------------------------------------------------------------------------------------------------------------------------------------------------------------------------------------------------------------------------------------------------------------------------------------------------------------------------------------------------------------------------------------------------------------------------------------------------------------------------------------------------------------------------------------------------------------------------------------------------------------------------------------------------------------------------------------------------------------------------------------------------------------------------------------------------------------------------------------------------------------------------------------------------------------------------------------------------------------------------------------------------------------------------------------------------------------------------------------------------------------------------------------------------------------------------------------------------------------------------------------------------------------------------------------------------------------------|--------------------------------------------------------------------------------------------------------------|----------------------------------------------------------------------------------------------------------------------|--------------------------------------------------------------------------------------------------------------------------------------------------------------------------------------------------------------------------------------------------------------------------------------------------------------------------------------------------------------------------------------------------------------------------------------------------------------------------------------------------------------------------------------------------------------------------------------------------------------------------------------------------------------------------------------------------------------------------------------------------------------------------------------------------------------------------------------------------------------------------------------------------------------------------------------------------------------------------------------------------------------------------------------------------------------|
| EPI_ISL_7437787                                                                                                                                                                                                                                                                                                                                                                                                                                                                                                                                                                                                                                                                                                                                                                                                                                                                                                                                                                                                                                                                                                                                                                                                                                                                                                                                                                                                                                                                                                                                                                                                                                                                                                                                                                                                                                                                                                                                                                                                                                                                                                                                                                                                                                                                                                                                                                                                                                                                                                                                                                                                                                                                                                                                                                                                                                                                                                                                                                                                                                                                                                                                                                                                                                                                                                                                                                                                                                                                                                                                                                                                                                                                                                                                                                                                                                                                                                                                                                                                                                                                                                                                                                                                                                                                                                                                                                                                                                                                                                                                                                                                                                                                                                                                                                                                                                                                                                                                                                                                                                                                                                                                                                                                                                                                                                                                                                                                                                                                                                                                                                                                                                                                                                                                                                                                                                                                                                                                                                                                                                                                                                                                                                                                                                                                                                                                                                                                                                                                                                                                                                                                                                                                                                                                                                                                                                                                                                                                                                                                                                                                                                                                                                                                                                                                                                                                                                                                                                                                                                                                                                                                                                                                                                                                                                                                                                                                                                                                                                                                                                                                                                                                                                                                                                                                                                                                                                                                                                                                                                                                                                                                                                                                                                                                                                                                                                                                                                                                                                                                                                                                                                                                                                                                                                                                                                                                                                                                                                                                                                                                                                                                                                                                                                                                                                                                                                                                                                                                                                                                                                                                                                                                                                                                                                                                                                                                                                                                                                                                                                                                                                                                                                                                                                                                                                                                                                                                                                                                                                                                                                                                                                                                                                                                                                                                                                                                                                                                                                                                                                                                                                                                                                                                                                                                                                                                                                                                                                                                                                                                                                                                                                                                                                                                                                                                                                                                                                                                                                                                                                                                                                                                                                                                                                                                                                                                                                                                                                                                                                                                                                                                                                                                                                                                                                                                                                                                                                                                                                                                                                                                                                                                                                                                                                                                                                                                                                                                                                                                                                                                                                                                                                      | Pasteur, Paris                                                                                               |                                                                                                                      |                                                                                                                                                                                                                                                                                                                                                                                                                                                                                                                                                                                                                                                                                                                                                                                                                                                                                                                                                                                                                                                              |
| EPI_ISL_7450035                                                                                                                                                                                                                                                                                                                                                                                                                                                                                                                                                                                                                                                                                                                                                                                                                                                                                                                                                                                                                                                                                                                                                                                                                                                                                                                                                                                                                                                                                                                                                                                                                                                                                                                                                                                                                                                                                                                                                                                                                                                                                                                                                                                                                                                                                                                                                                                                                                                                                                                                                                                                                                                                                                                                                                                                                                                                                                                                                                                                                                                                                                                                                                                                                                                                                                                                                                                                                                                                                                                                                                                                                                                                                                                                                                                                                                                                                                                                                                                                                                                                                                                                                                                                                                                                                                                                                                                                                                                                                                                                                                                                                                                                                                                                                                                                                                                                                                                                                                                                                                                                                                                                                                                                                                                                                                                                                                                                                                                                                                                                                                                                                                                                                                                                                                                                                                                                                                                                                                                                                                                                                                                                                                                                                                                                                                                                                                                                                                                                                                                                                                                                                                                                                                                                                                                                                                                                                                                                                                                                                                                                                                                                                                                                                                                                                                                                                                                                                                                                                                                                                                                                                                                                                                                                                                                                                                                                                                                                                                                                                                                                                                                                                                                                                                                                                                                                                                                                                                                                                                                                                                                                                                                                                                                                                                                                                                                                                                                                                                                                                                                                                                                                                                                                                                                                                                                                                                                                                                                                                                                                                                                                                                                                                                                                                                                                                                                                                                                                                                                                                                                                                                                                                                                                                                                                                                                                                                                                                                                                                                                                                                                                                                                                                                                                                                                                                                                                                                                                                                                                                                                                                                                                                                                                                                                                                                                                                                                                                                                                                                                                                                                                                                                                                                                                                                                                                                                                                                                                                                                                                                                                                                                                                                                                                                                                                                                                                                                                                                                                                                                                                                                                                                                                                                                                                                                                                                                                                                                                                                                                                                                                                                                                                                                                                                                                                                                                                                                                                                                                                                                                                                                                                                                                                                                                                                                                                                                                                                                                                                                                                                                                                                      | Labor Prof. Dr. G. Enders MVZ GDR                                                                            | Robert Koch Institute                                                                                                |                                                                                                                                                                                                                                                                                                                                                                                                                                                                                                                                                                                                                                                                                                                                                                                                                                                                                                                                                                                                                                                              |
| EPI_ISL_7450728                                                                                                                                                                                                                                                                                                                                                                                                                                                                                                                                                                                                                                                                                                                                                                                                                                                                                                                                                                                                                                                                                                                                                                                                                                                                                                                                                                                                                                                                                                                                                                                                                                                                                                                                                                                                                                                                                                                                                                                                                                                                                                                                                                                                                                                                                                                                                                                                                                                                                                                                                                                                                                                                                                                                                                                                                                                                                                                                                                                                                                                                                                                                                                                                                                                                                                                                                                                                                                                                                                                                                                                                                                                                                                                                                                                                                                                                                                                                                                                                                                                                                                                                                                                                                                                                                                                                                                                                                                                                                                                                                                                                                                                                                                                                                                                                                                                                                                                                                                                                                                                                                                                                                                                                                                                                                                                                                                                                                                                                                                                                                                                                                                                                                                                                                                                                                                                                                                                                                                                                                                                                                                                                                                                                                                                                                                                                                                                                                                                                                                                                                                                                                                                                                                                                                                                                                                                                                                                                                                                                                                                                                                                                                                                                                                                                                                                                                                                                                                                                                                                                                                                                                                                                                                                                                                                                                                                                                                                                                                                                                                                                                                                                                                                                                                                                                                                                                                                                                                                                                                                                                                                                                                                                                                                                                                                                                                                                                                                                                                                                                                                                                                                                                                                                                                                                                                                                                                                                                                                                                                                                                                                                                                                                                                                                                                                                                                                                                                                                                                                                                                                                                                                                                                                                                                                                                                                                                                                                                                                                                                                                                                                                                                                                                                                                                                                                                                                                                                                                                                                                                                                                                                                                                                                                                                                                                                                                                                                                                                                                                                                                                                                                                                                                                                                                                                                                                                                                                                                                                                                                                                                                                                                                                                                                                                                                                                                                                                                                                                                                                                                                                                                                                                                                                                                                                                                                                                                                                                                                                                                                                                                                                                                                                                                                                                                                                                                                                                                                                                                                                                                                                                                                                                                                                                                                                                                                                                                                                                                                                                                                                                                                                                      | Laboratoire BIORANCE                                                                                         | CHU Pontchaillou                                                                                                     | DE TAYRAC Marie; DENOUEL Florent; ETCHEVERRY Amandine; FEBREAU Christine; GALBERT Marie Dominique; GROLHIER Claire; JAGLINE Steven; PRONIER Charlotte; QUENET Benjamin; SASSI Mohamed; THIBAUT Vincent                                                                                                                                                                                                                                                                                                                                                                                                                                                                                                                                                                                                                                                                                                                                                                                                                                                       |
| EPI_ISL_6971091                                                                                                                                                                                                                                                                                                                                                                                                                                                                                                                                                                                                                                                                                                                                                                                                                                                                                                                                                                                                                                                                                                                                                                                                                                                                                                                                                                                                                                                                                                                                                                                                                                                                                                                                                                                                                                                                                                                                                                                                                                                                                                                                                                                                                                                                                                                                                                                                                                                                                                                                                                                                                                                                                                                                                                                                                                                                                                                                                                                                                                                                                                                                                                                                                                                                                                                                                                                                                                                                                                                                                                                                                                                                                                                                                                                                                                                                                                                                                                                                                                                                                                                                                                                                                                                                                                                                                                                                                                                                                                                                                                                                                                                                                                                                                                                                                                                                                                                                                                                                                                                                                                                                                                                                                                                                                                                                                                                                                                                                                                                                                                                                                                                                                                                                                                                                                                                                                                                                                                                                                                                                                                                                                                                                                                                                                                                                                                                                                                                                                                                                                                                                                                                                                                                                                                                                                                                                                                                                                                                                                                                                                                                                                                                                                                                                                                                                                                                                                                                                                                                                                                                                                                                                                                                                                                                                                                                                                                                                                                                                                                                                                                                                                                                                                                                                                                                                                                                                                                                                                                                                                                                                                                                                                                                                                                                                                                                                                                                                                                                                                                                                                                                                                                                                                                                                                                                                                                                                                                                                                                                                                                                                                                                                                                                                                                                                                                                                                                                                                                                                                                                                                                                                                                                                                                                                                                                                                                                                                                                                                                                                                                                                                                                                                                                                                                                                                                                                                                                                                                                                                                                                                                                                                                                                                                                                                                                                                                                                                                                                                                                                                                                                                                                                                                                                                                                                                                                                                                                                                                                                                                                                                                                                                                                                                                                                                                                                                                                                                                                                                                                                                                                                                                                                                                                                                                                                                                                                                                                                                                                                                                                                                                                                                                                                                                                                                                                                                                                                                                                                                                                                                                                                                                                                                                                                                                                                                                                                                                                                                                                                                                                                                                      | Laboratoire analyse med                                                                                      | LABORIZON CENTRE BIOGROUP                                                                                            |                                                                                                                                                                                                                                                                                                                                                                                                                                                                                                                                                                                                                                                                                                                                                                                                                                                                                                                                                                                                                                                              |
| EPI_ISL_7309168                                                                                                                                                                                                                                                                                                                                                                                                                                                                                                                                                                                                                                                                                                                                                                                                                                                                                                                                                                                                                                                                                                                                                                                                                                                                                                                                                                                                                                                                                                                                                                                                                                                                                                                                                                                                                                                                                                                                                                                                                                                                                                                                                                                                                                                                                                                                                                                                                                                                                                                                                                                                                                                                                                                                                                                                                                                                                                                                                                                                                                                                                                                                                                                                                                                                                                                                                                                                                                                                                                                                                                                                                                                                                                                                                                                                                                                                                                                                                                                                                                                                                                                                                                                                                                                                                                                                                                                                                                                                                                                                                                                                                                                                                                                                                                                                                                                                                                                                                                                                                                                                                                                                                                                                                                                                                                                                                                                                                                                                                                                                                                                                                                                                                                                                                                                                                                                                                                                                                                                                                                                                                                                                                                                                                                                                                                                                                                                                                                                                                                                                                                                                                                                                                                                                                                                                                                                                                                                                                                                                                                                                                                                                                                                                                                                                                                                                                                                                                                                                                                                                                                                                                                                                                                                                                                                                                                                                                                                                                                                                                                                                                                                                                                                                                                                                                                                                                                                                                                                                                                                                                                                                                                                                                                                                                                                                                                                                                                                                                                                                                                                                                                                                                                                                                                                                                                                                                                                                                                                                                                                                                                                                                                                                                                                                                                                                                                                                                                                                                                                                                                                                                                                                                                                                                                                                                                                                                                                                                                                                                                                                                                                                                                                                                                                                                                                                                                                                                                                                                                                                                                                                                                                                                                                                                                                                                                                                                                                                                                                                                                                                                                                                                                                                                                                                                                                                                                                                                                                                                                                                                                                                                                                                                                                                                                                                                                                                                                                                                                                                                                                                                                                                                                                                                                                                                                                                                                                                                                                                                                                                                                                                                                                                                                                                                                                                                                                                                                                                                                                                                                                                                                                                                                                                                                                                                                                                                                                                                                                                                                                                                                                                                                      | Laboratorio Central de Saude Publica do Rio Grande do Sul/Centro Estadual de Vigilancia em Saude             | Centro de Desenvolvimento Cientifico e Tecnológico (CDCT)/Centro Estadual de Vigilancia em Saude                     | Alana Rossetti; Cláudia Maria Dornelles da Silva; Fernanda Marques Godinho; Larissa Vitoria da Silva; Ludmila Florenzano Barcellos; Miguel S Andrade.; Regina Bones Barcellos; Richard Steiner Salvato; Tatiana Schaffer Gregliani                                                                                                                                                                                                                                                                                                                                                                                                                                                                                                                                                                                                                                                                                                                                                                                                                           |
| EPI_ISL_7497691                                                                                                                                                                                                                                                                                                                                                                                                                                                                                                                                                                                                                                                                                                                                                                                                                                                                                                                                                                                                                                                                                                                                                                                                                                                                                                                                                                                                                                                                                                                                                                                                                                                                                                                                                                                                                                                                                                                                                                                                                                                                                                                                                                                                                                                                                                                                                                                                                                                                                                                                                                                                                                                                                                                                                                                                                                                                                                                                                                                                                                                                                                                                                                                                                                                                                                                                                                                                                                                                                                                                                                                                                                                                                                                                                                                                                                                                                                                                                                                                                                                                                                                                                                                                                                                                                                                                                                                                                                                                                                                                                                                                                                                                                                                                                                                                                                                                                                                                                                                                                                                                                                                                                                                                                                                                                                                                                                                                                                                                                                                                                                                                                                                                                                                                                                                                                                                                                                                                                                                                                                                                                                                                                                                                                                                                                                                                                                                                                                                                                                                                                                                                                                                                                                                                                                                                                                                                                                                                                                                                                                                                                                                                                                                                                                                                                                                                                                                                                                                                                                                                                                                                                                                                                                                                                                                                                                                                                                                                                                                                                                                                                                                                                                                                                                                                                                                                                                                                                                                                                                                                                                                                                                                                                                                                                                                                                                                                                                                                                                                                                                                                                                                                                                                                                                                                                                                                                                                                                                                                                                                                                                                                                                                                                                                                                                                                                                                                                                                                                                                                                                                                                                                                                                                                                                                                                                                                                                                                                                                                                                                                                                                                                                                                                                                                                                                                                                                                                                                                                                                                                                                                                                                                                                                                                                                                                                                                                                                                                                                                                                                                                                                                                                                                                                                                                                                                                                                                                                                                                                                                                                                                                                                                                                                                                                                                                                                                                                                                                                                                                                                                                                                                                                                                                                                                                                                                                                                                                                                                                                                                                                                                                                                                                                                                                                                                                                                                                                                                                                                                                                                                                                                                                                                                                                                                                                                                                                                                                                                                                                                                                                                                                                      | Laboratory Corporation of America                                                                            | Centers for Disease Control and Prevention Division of Viral Diseases, Pathogen Discovery                            | Amanda Douglas; Amanda Suchanec; Andrea Throop; Ayla Burns; Benjamin Rambo-Martin; Bobbi Cro; Brian Krueger; Brian Norvell; Christopher Gulvick; Christos Petropoulos; Clinton Paden; Craig Lukasik; Dakota Howard; Debbie Bales; Dhvani Batra; Duncan MacCannell; Eyad Almasri; Goran Stevovic; Howard Engel; Hrushikesh Deshmukh; Jake Humphrey; Jana Schmitt; Jason Caravas; Joe Voshell; John Krueger; Jonathan Meltzer; Jonathan Williams; Kimberly Wagner; Kristine Lacey; Lax Jey; Lisa Pfefferle; Lyndon Titon; Manoj Jain; Maria Eusebio; Mary Cristobal; Almy Williamson; Matthew Robinson; Matthew Schmeier; Michael Levandoski; Mike Sapeta; Mindy Nye; Minoo Agarwal; Moshan Kolia; Nuthawin Chareonsri; Owen Cohen; Peter Cook; Prashant Gupta; Qian Zeng; Rama Ghatti; Scott Parker; Scott Ryan; Scott Sammons; Shatavia Morrison; Stanley Letovsky; Steven Ragan; Suresh Selvaraju; Susan Countryman; Susan Hick; Suzanne Dale; Thomas Urban; Tim Kupak; Ticia Zwielfel-Horvitz; Tymecia Kendall; Victoria Cana; Victoria Chaffer; Gregliani |
| EPI_ISL_7567146                                                                                                                                                                                                                                                                                                                                                                                                                                                                                                                                                                                                                                                                                                                                                                                                                                                                                                                                                                                                                                                                                                                                                                                                                                                                                                                                                                                                                                                                                                                                                                                                                                                                                                                                                                                                                                                                                                                                                                                                                                                                                                                                                                                                                                                                                                                                                                                                                                                                                                                                                                                                                                                                                                                                                                                                                                                                                                                                                                                                                                                                                                                                                                                                                                                                                                                                                                                                                                                                                                                                                                                                                                                                                                                                                                                                                                                                                                                                                                                                                                                                                                                                                                                                                                                                                                                                                                                                                                                                                                                                                                                                                                                                                                                                                                                                                                                                                                                                                                                                                                                                                                                                                                                                                                                                                                                                                                                                                                                                                                                                                                                                                                                                                                                                                                                                                                                                                                                                                                                                                                                                                                                                                                                                                                                                                                                                                                                                                                                                                                                                                                                                                                                                                                                                                                                                                                                                                                                                                                                                                                                                                                                                                                                                                                                                                                                                                                                                                                                                                                                                                                                                                                                                                                                                                                                                                                                                                                                                                                                                                                                                                                                                                                                                                                                                                                                                                                                                                                                                                                                                                                                                                                                                                                                                                                                                                                                                                                                                                                                                                                                                                                                                                                                                                                                                                                                                                                                                                                                                                                                                                                                                                                                                                                                                                                                                                                                                                                                                                                                                                                                                                                                                                                                                                                                                                                                                                                                                                                                                                                                                                                                                                                                                                                                                                                                                                                                                                                                                                                                                                                                                                                                                                                                                                                                                                                                                                                                                                                                                                                                                                                                                                                                                                                                                                                                                                                                                                                                                                                                                                                                                                                                                                                                                                                                                                                                                                                                                                                                                                                                                                                                                                                                                                                                                                                                                                                                                                                                                                                                                                                                                                                                                                                                                                                                                                                                                                                                                                                                                                                                                                                                                                                                                                                                                                                                                                                                                                                                                                                                                                                                                                                      | Laboratory of Clinical Microbiology, Virology and Biomechanics, ASST Fatebenefratelli Sacco - Sacco Hospital | Laboratory of Clinical Microbiology, Virology and Biomechanics, ASST Fatebenefratelli Sacco - Sacco Hospital         | Alberto Rizzo; Fiorenza Bracchitta; Valeria Micheli                                                                                                                                                                                                                                                                                                                                                                                                                                                                                                                                                                                                                                                                                                                                                                                                                                                                                                                                                                                                          |
| EPI_ISL_7220176                                                                                                                                                                                                                                                                                                                                                                                                                                                                                                                                                                                                                                                                                                                                                                                                                                                                                                                                                                                                                                                                                                                                                                                                                                                                                                                                                                                                                                                                                                                                                                                                                                                                                                                                                                                                                                                                                                                                                                                                                                                                                                                                                                                                                                                                                                                                                                                                                                                                                                                                                                                                                                                                                                                                                                                                                                                                                                                                                                                                                                                                                                                                                                                                                                                                                                                                                                                                                                                                                                                                                                                                                                                                                                                                                                                                                                                                                                                                                                                                                                                                                                                                                                                                                                                                                                                                                                                                                                                                                                                                                                                                                                                                                                                                                                                                                                                                                                                                                                                                                                                                                                                                                                                                                                                                                                                                                                                                                                                                                                                                                                                                                                                                                                                                                                                                                                                                                                                                                                                                                                                                                                                                                                                                                                                                                                                                                                                                                                                                                                                                                                                                                                                                                                                                                                                                                                                                                                                                                                                                                                                                                                                                                                                                                                                                                                                                                                                                                                                                                                                                                                                                                                                                                                                                                                                                                                                                                                                                                                                                                                                                                                                                                                                                                                                                                                                                                                                                                                                                                                                                                                                                                                                                                                                                                                                                                                                                                                                                                                                                                                                                                                                                                                                                                                                                                                                                                                                                                                                                                                                                                                                                                                                                                                                                                                                                                                                                                                                                                                                                                                                                                                                                                                                                                                                                                                                                                                                                                                                                                                                                                                                                                                                                                                                                                                                                                                                                                                                                                                                                                                                                                                                                                                                                                                                                                                                                                                                                                                                                                                                                                                                                                                                                                                                                                                                                                                                                                                                                                                                                                                                                                                                                                                                                                                                                                                                                                                                                                                                                                                                                                                                                                                                                                                                                                                                                                                                                                                                                                                                                                                                                                                                                                                                                                                                                                                                                                                                                                                                                                                                                                                                                                                                                                                                                                                                                                                                                                                                                                                                                                                                                                                      | Laboratory of Clinical Virology Heraklion Crete                                                              | Laboratory of Clinical Virology Heraklion Crete                                                                      | Alexandros Zafiroopoulos; George Souvrinovs                                                                                                                                                                                                                                                                                                                                                                                                                                                                                                                                                                                                                                                                                                                                                                                                                                                                                                                                                                                                                  |
| EPI_ISL_7264143                                                                                                                                                                                                                                                                                                                                                                                                                                                                                                                                                                                                                                                                                                                                                                                                                                                                                                                                                                                                                                                                                                                                                                                                                                                                                                                                                                                                                                                                                                                                                                                                                                                                                                                                                                                                                                                                                                                                                                                                                                                                                                                                                                                                                                                                                                                                                                                                                                                                                                                                                                                                                                                                                                                                                                                                                                                                                                                                                                                                                                                                                                                                                                                                                                                                                                                                                                                                                                                                                                                                                                                                                                                                                                                                                                                                                                                                                                                                                                                                                                                                                                                                                                                                                                                                                                                                                                                                                                                                                                                                                                                                                                                                                                                                                                                                                                                                                                                                                                                                                                                                                                                                                                                                                                                                                                                                                                                                                                                                                                                                                                                                                                                                                                                                                                                                                                                                                                                                                                                                                                                                                                                                                                                                                                                                                                                                                                                                                                                                                                                                                                                                                                                                                                                                                                                                                                                                                                                                                                                                                                                                                                                                                                                                                                                                                                                                                                                                                                                                                                                                                                                                                                                                                                                                                                                                                                                                                                                                                                                                                                                                                                                                                                                                                                                                                                                                                                                                                                                                                                                                                                                                                                                                                                                                                                                                                                                                                                                                                                                                                                                                                                                                                                                                                                                                                                                                                                                                                                                                                                                                                                                                                                                                                                                                                                                                                                                                                                                                                                                                                                                                                                                                                                                                                                                                                                                                                                                                                                                                                                                                                                                                                                                                                                                                                                                                                                                                                                                                                                                                                                                                                                                                                                                                                                                                                                                                                                                                                                                                                                                                                                                                                                                                                                                                                                                                                                                                                                                                                                                                                                                                                                                                                                                                                                                                                                                                                                                                                                                                                                                                                                                                                                                                                                                                                                                                                                                                                                                                                                                                                                                                                                                                                                                                                                                                                                                                                                                                                                                                                                                                                                                                                                                                                                                                                                                                                                                                                                                                                                                                                                                                                                      | Lahey Hospital                                                                                               | New England Biolabs                                                                                                  | Abel, G.; B.W.; C.J.; Elfalah, M.; Flynn; Heim, K.; Karolides, M.; L. and Langhorst; Leger, P.; Michaels, L.; Pinet, K.; Skelton, T.; Sun                                                                                                                                                                                                                                                                                                                                                                                                                                                                                                                                                                                                                                                                                                                                                                                                                                                                                                                    |
| EPI_ISL_7543847; EPI_ISL_7543913; EPI_ISL_7543935; EPI_ISL_7543949; EPI_ISL_7543960; EPI_ISL_7544508; EPI_ISL_7544601; EPI_ISL_7544676; EPI_ISL_7544705                                                                                                                                                                                                                                                                                                                                                                                                                                                                                                                                                                                                                                                                                                                                                                                                                                                                                                                                                                                                                                                                                                                                                                                                                                                                                                                                                                                                                                                                                                                                                                                                                                                                                                                                                                                                                                                                                                                                                                                                                                                                                                                                                                                                                                                                                                                                                                                                                                                                                                                                                                                                                                                                                                                                                                                                                                                                                                                                                                                                                                                                                                                                                                                                                                                                                                                                                                                                                                                                                                                                                                                                                                                                                                                                                                                                                                                                                                                                                                                                                                                                                                                                                                                                                                                                                                                                                                                                                                                                                                                                                                                                                                                                                                                                                                                                                                                                                                                                                                                                                                                                                                                                                                                                                                                                                                                                                                                                                                                                                                                                                                                                                                                                                                                                                                                                                                                                                                                                                                                                                                                                                                                                                                                                                                                                                                                                                                                                                                                                                                                                                                                                                                                                                                                                                                                                                                                                                                                                                                                                                                                                                                                                                                                                                                                                                                                                                                                                                                                                                                                                                                                                                                                                                                                                                                                                                                                                                                                                                                                                                                                                                                                                                                                                                                                                                                                                                                                                                                                                                                                                                                                                                                                                                                                                                                                                                                                                                                                                                                                                                                                                                                                                                                                                                                                                                                                                                                                                                                                                                                                                                                                                                                                                                                                                                                                                                                                                                                                                                                                                                                                                                                                                                                                                                                                                                                                                                                                                                                                                                                                                                                                                                                                                                                                                                                                                                                                                                                                                                                                                                                                                                                                                                                                                                                                                                                                                                                                                                                                                                                                                                                                                                                                                                                                                                                                                                                                                                                                                                                                                                                                                                                                                                                                                                                                                                                                                                                                                                                                                                                                                                                                                                                                                                                                                                                                                                                                                                                                                                                                                                                                                                                                                                                                                                                                                                                                                                                                                                                                                                                                                                                                                                                                                                                                                                                                                                                                                                                                                                              |                                                                                                              |                                                                                                                      | Arash Iranzadeh; Bruna Galvao; Carolyn Williamson; Deelan Doolah; Diana Hardie; Gert Marais; Innocent Mudau; Luicer Olubayo; Lynn Tyers; Marvin Hsiao; Nukozula Mbhele; Ramega Joseph; Stephen Korsman                                                                                                                                                                                                                                                                                                                                                                                                                                                                                                                                                                                                                                                                                                                                                                                                                                                       |
| see above                                                                                                                                                                                                                                                                                                                                                                                                                                                                                                                                                                                                                                                                                                                                                                                                                                                                                                                                                                                                                                                                                                                                                                                                                                                                                                                                                                                                                                                                                                                                                                                                                                                                                                                                                                                                                                                                                                                                                                                                                                                                                                                                                                                                                                                                                                                                                                                                                                                                                                                                                                                                                                                                                                                                                                                                                                                                                                                                                                                                                                                                                                                                                                                                                                                                                                                                                                                                                                                                                                                                                                                                                                                                                                                                                                                                                                                                                                                                                                                                                                                                                                                                                                                                                                                                                                                                                                                                                                                                                                                                                                                                                                                                                                                                                                                                                                                                                                                                                                                                                                                                                                                                                                                                                                                                                                                                                                                                                                                                                                                                                                                                                                                                                                                                                                                                                                                                                                                                                                                                                                                                                                                                                                                                                                                                                                                                                                                                                                                                                                                                                                                                                                                                                                                                                                                                                                                                                                                                                                                                                                                                                                                                                                                                                                                                                                                                                                                                                                                                                                                                                                                                                                                                                                                                                                                                                                                                                                                                                                                                                                                                                                                                                                                                                                                                                                                                                                                                                                                                                                                                                                                                                                                                                                                                                                                                                                                                                                                                                                                                                                                                                                                                                                                                                                                                                                                                                                                                                                                                                                                                                                                                                                                                                                                                                                                                                                                                                                                                                                                                                                                                                                                                                                                                                                                                                                                                                                                                                                                                                                                                                                                                                                                                                                                                                                                                                                                                                                                                                                                                                                                                                                                                                                                                                                                                                                                                                                                                                                                                                                                                                                                                                                                                                                                                                                                                                                                                                                                                                                                                                                                                                                                                                                                                                                                                                                                                                                                                                                                                                                                                                                                                                                                                                                                                                                                                                                                                                                                                                                                                                                                                                                                                                                                                                                                                                                                                                                                                                                                                                                                                                                                                                                                                                                                                                                                                                                                                                                                                                                                                                                                                                                            | Lancet                                                                                                       | NHLS/UCT                                                                                                             |                                                                                                                                                                                                                                                                                                                                                                                                                                                                                                                                                                                                                                                                                                                                                                                                                                                                                                                                                                                                                                                              |
| EPI_ISL_6913991; EPI_ISL_6913992; EPI_ISL_6913993; EPI_ISL_6913994; EPI_ISL_6913995; EPI_ISL_6913996; EPI_ISL_6913997; EPI_ISL_6913998; EPI_ISL_6914000; EPI_ISL_6914001; EPI_ISL_6914002; EPI_ISL_6914003; EPI_ISL_6914004; EPI_ISL_6914005; EPI_ISL_6914006; EPI_ISL_6914007                                                                                                                                                                                                                                                                                                                                                                                                                                                                                                                                                                                                                                                                                                                                                                                                                                                                                                                                                                                                                                                                                                                                                                                                                                                                                                                                                                                                                                                                                                                                                                                                                                                                                                                                                                                                                                                                                                                                                                                                                                                                                                                                                                                                                                                                                                                                                                                                                                                                                                                                                                                                                                                                                                                                                                                                                                                                                                                                                                                                                                                                                                                                                                                                                                                                                                                                                                                                                                                                                                                                                                                                                                                                                                                                                                                                                                                                                                                                                                                                                                                                                                                                                                                                                                                                                                                                                                                                                                                                                                                                                                                                                                                                                                                                                                                                                                                                                                                                                                                                                                                                                                                                                                                                                                                                                                                                                                                                                                                                                                                                                                                                                                                                                                                                                                                                                                                                                                                                                                                                                                                                                                                                                                                                                                                                                                                                                                                                                                                                                                                                                                                                                                                                                                                                                                                                                                                                                                                                                                                                                                                                                                                                                                                                                                                                                                                                                                                                                                                                                                                                                                                                                                                                                                                                                                                                                                                                                                                                                                                                                                                                                                                                                                                                                                                                                                                                                                                                                                                                                                                                                                                                                                                                                                                                                                                                                                                                                                                                                                                                                                                                                                                                                                                                                                                                                                                                                                                                                                                                                                                                                                                                                                                                                                                                                                                                                                                                                                                                                                                                                                                                                                                                                                                                                                                                                                                                                                                                                                                                                                                                                                                                                                                                                                                                                                                                                                                                                                                                                                                                                                                                                                                                                                                                                                                                                                                                                                                                                                                                                                                                                                                                                                                                                                                                                                                                                                                                                                                                                                                                                                                                                                                                                                                                                                                                                                                                                                                                                                                                                                                                                                                                                                                                                                                                                                                                                                                                                                                                                                                                                                                                                                                                                                                                                                                                                                                                                                                                                                                                                                                                                                                                                                                                                                                                                                                                                                       |                                                                                                              |                                                                                                                      | Amoako Og; Bhiman JN; Everatt J; Ismail A; Mahlungu B; Mnguni A; Mohale T; Ntuli N; Scheepers C; Wolter N                                                                                                                                                                                                                                                                                                                                                                                                                                                                                                                                                                                                                                                                                                                                                                                                                                                                                                                                                    |
| see above                                                                                                                                                                                                                                                                                                                                                                                                                                                                                                                                                                                                                                                                                                                                                                                                                                                                                                                                                                                                                                                                                                                                                                                                                                                                                                                                                                                                                                                                                                                                                                                                                                                                                                                                                                                                                                                                                                                                                                                                                                                                                                                                                                                                                                                                                                                                                                                                                                                                                                                                                                                                                                                                                                                                                                                                                                                                                                                                                                                                                                                                                                                                                                                                                                                                                                                                                                                                                                                                                                                                                                                                                                                                                                                                                                                                                                                                                                                                                                                                                                                                                                                                                                                                                                                                                                                                                                                                                                                                                                                                                                                                                                                                                                                                                                                                                                                                                                                                                                                                                                                                                                                                                                                                                                                                                                                                                                                                                                                                                                                                                                                                                                                                                                                                                                                                                                                                                                                                                                                                                                                                                                                                                                                                                                                                                                                                                                                                                                                                                                                                                                                                                                                                                                                                                                                                                                                                                                                                                                                                                                                                                                                                                                                                                                                                                                                                                                                                                                                                                                                                                                                                                                                                                                                                                                                                                                                                                                                                                                                                                                                                                                                                                                                                                                                                                                                                                                                                                                                                                                                                                                                                                                                                                                                                                                                                                                                                                                                                                                                                                                                                                                                                                                                                                                                                                                                                                                                                                                                                                                                                                                                                                                                                                                                                                                                                                                                                                                                                                                                                                                                                                                                                                                                                                                                                                                                                                                                                                                                                                                                                                                                                                                                                                                                                                                                                                                                                                                                                                                                                                                                                                                                                                                                                                                                                                                                                                                                                                                                                                                                                                                                                                                                                                                                                                                                                                                                                                                                                                                                                                                                                                                                                                                                                                                                                                                                                                                                                                                                                                                                                                                                                                                                                                                                                                                                                                                                                                                                                                                                                                                                                                                                                                                                                                                                                                                                                                                                                                                                                                                                                                                                                                                                                                                                                                                                                                                                                                                                                                                                                                                                                                                            | Lancet Laboratories                                                                                          | National Institute for Communicable Diseases of the National Health Laboratory Service                               |                                                                                                                                                                                                                                                                                                                                                                                                                                                                                                                                                                                                                                                                                                                                                                                                                                                                                                                                                                                                                                                              |
| EPI_ISL_7420297; EPI_ISL_7420298; EPI_ISL_7420371; EPI_ISL_7420381                                                                                                                                                                                                                                                                                                                                                                                                                                                                                                                                                                                                                                                                                                                                                                                                                                                                                                                                                                                                                                                                                                                                                                                                                                                                                                                                                                                                                                                                                                                                                                                                                                                                                                                                                                                                                                                                                                                                                                                                                                                                                                                                                                                                                                                                                                                                                                                                                                                                                                                                                                                                                                                                                                                                                                                                                                                                                                                                                                                                                                                                                                                                                                                                                                                                                                                                                                                                                                                                                                                                                                                                                                                                                                                                                                                                                                                                                                                                                                                                                                                                                                                                                                                                                                                                                                                                                                                                                                                                                                                                                                                                                                                                                                                                                                                                                                                                                                                                                                                                                                                                                                                                                                                                                                                                                                                                                                                                                                                                                                                                                                                                                                                                                                                                                                                                                                                                                                                                                                                                                                                                                                                                                                                                                                                                                                                                                                                                                                                                                                                                                                                                                                                                                                                                                                                                                                                                                                                                                                                                                                                                                                                                                                                                                                                                                                                                                                                                                                                                                                                                                                                                                                                                                                                                                                                                                                                                                                                                                                                                                                                                                                                                                                                                                                                                                                                                                                                                                                                                                                                                                                                                                                                                                                                                                                                                                                                                                                                                                                                                                                                                                                                                                                                                                                                                                                                                                                                                                                                                                                                                                                                                                                                                                                                                                                                                                                                                                                                                                                                                                                                                                                                                                                                                                                                                                                                                                                                                                                                                                                                                                                                                                                                                                                                                                                                                                                                                                                                                                                                                                                                                                                                                                                                                                                                                                                                                                                                                                                                                                                                                                                                                                                                                                                                                                                                                                                                                                                                                                                                                                                                                                                                                                                                                                                                                                                                                                                                                                                                                                                                                                                                                                                                                                                                                                                                                                                                                                                                                                                                                                                                                                                                                                                                                                                                                                                                                                                                                                                                                                                                                                                                                                                                                                                                                                                                                                                                                                                                                                                                                                                                   | Landesgesundheitsamt Baden-Württemberg                                                                       | Robert Koch Institute                                                                                                |                                                                                                                                                                                                                                                                                                                                                                                                                                                                                                                                                                                                                                                                                                                                                                                                                                                                                                                                                                                                                                                              |
| EPI_ISL_7543863                                                                                                                                                                                                                                                                                                                                                                                                                                                                                                                                                                                                                                                                                                                                                                                                                                                                                                                                                                                                                                                                                                                                                                                                                                                                                                                                                                                                                                                                                                                                                                                                                                                                                                                                                                                                                                                                                                                                                                                                                                                                                                                                                                                                                                                                                                                                                                                                                                                                                                                                                                                                                                                                                                                                                                                                                                                                                                                                                                                                                                                                                                                                                                                                                                                                                                                                                                                                                                                                                                                                                                                                                                                                                                                                                                                                                                                                                                                                                                                                                                                                                                                                                                                                                                                                                                                                                                                                                                                                                                                                                                                                                                                                                                                                                                                                                                                                                                                                                                                                                                                                                                                                                                                                                                                                                                                                                                                                                                                                                                                                                                                                                                                                                                                                                                                                                                                                                                                                                                                                                                                                                                                                                                                                                                                                                                                                                                                                                                                                                                                                                                                                                                                                                                                                                                                                                                                                                                                                                                                                                                                                                                                                                                                                                                                                                                                                                                                                                                                                                                                                                                                                                                                                                                                                                                                                                                                                                                                                                                                                                                                                                                                                                                                                                                                                                                                                                                                                                                                                                                                                                                                                                                                                                                                                                                                                                                                                                                                                                                                                                                                                                                                                                                                                                                                                                                                                                                                                                                                                                                                                                                                                                                                                                                                                                                                                                                                                                                                                                                                                                                                                                                                                                                                                                                                                                                                                                                                                                                                                                                                                                                                                                                                                                                                                                                                                                                                                                                                                                                                                                                                                                                                                                                                                                                                                                                                                                                                                                                                                                                                                                                                                                                                                                                                                                                                                                                                                                                                                                                                                                                                                                                                                                                                                                                                                                                                                                                                                                                                                                                                                                                                                                                                                                                                                                                                                                                                                                                                                                                                                                                                                                                                                                                                                                                                                                                                                                                                                                                                                                                                                                                                                                                                                                                                                                                                                                                                                                                                                                                                                                                                                                                      | Langa Clinic wc LAN                                                                                          | NHLS/UCT                                                                                                             | Arash Iranzadeh; Bruna Galvao; Carolyn Williamson; Deelan Doolah; Diana Hardie; Gert Marais; Innocent Mudau; Luicer Olubayo; Lynn Tyers; Marvin Hsiao; Nukozula Mbhele; Ramega Joseph; Stephen Korsman                                                                                                                                                                                                                                                                                                                                                                                                                                                                                                                                                                                                                                                                                                                                                                                                                                                       |
| EPI_ISL_7620900; EPI_ISL_7621182; EPI_ISL_7621503; EPI_ISL_7621817                                                                                                                                                                                                                                                                                                                                                                                                                                                                                                                                                                                                                                                                                                                                                                                                                                                                                                                                                                                                                                                                                                                                                                                                                                                                                                                                                                                                                                                                                                                                                                                                                                                                                                                                                                                                                                                                                                                                                                                                                                                                                                                                                                                                                                                                                                                                                                                                                                                                                                                                                                                                                                                                                                                                                                                                                                                                                                                                                                                                                                                                                                                                                                                                                                                                                                                                                                                                                                                                                                                                                                                                                                                                                                                                                                                                                                                                                                                                                                                                                                                                                                                                                                                                                                                                                                                                                                                                                                                                                                                                                                                                                                                                                                                                                                                                                                                                                                                                                                                                                                                                                                                                                                                                                                                                                                                                                                                                                                                                                                                                                                                                                                                                                                                                                                                                                                                                                                                                                                                                                                                                                                                                                                                                                                                                                                                                                                                                                                                                                                                                                                                                                                                                                                                                                                                                                                                                                                                                                                                                                                                                                                                                                                                                                                                                                                                                                                                                                                                                                                                                                                                                                                                                                                                                                                                                                                                                                                                                                                                                                                                                                                                                                                                                                                                                                                                                                                                                                                                                                                                                                                                                                                                                                                                                                                                                                                                                                                                                                                                                                                                                                                                                                                                                                                                                                                                                                                                                                                                                                                                                                                                                                                                                                                                                                                                                                                                                                                                                                                                                                                                                                                                                                                                                                                                                                                                                                                                                                                                                                                                                                                                                                                                                                                                                                                                                                                                                                                                                                                                                                                                                                                                                                                                                                                                                                                                                                                                                                                                                                                                                                                                                                                                                                                                                                                                                                                                                                                                                                                                                                                                                                                                                                                                                                                                                                                                                                                                                                                                                                                                                                                                                                                                                                                                                                                                                                                                                                                                                                                                                                                                                                                                                                                                                                                                                                                                                                                                                                                                                                                                                                                                                                                                                                                                                                                                                                                                                                                                                                                                                                                                   | Laverty Pathology                                                                                            | NSW Health Pathology - Institute of Clinical Pathology and Medical Research; Westmead Hospital; University of Sydney | Arnott A.; Draper J.; Gall M.; Martinez E.; Rockett R.; Sintchenko V.; on behalf of ICPMR                                                                                                                                                                                                                                                                                                                                                                                                                                                                                                                                                                                                                                                                                                                                                                                                                                                                                                                                                                    |
| EPI_ISL_7348417; EPI_ISL_7348427                                                                                                                                                                                                                                                                                                                                                                                                                                                                                                                                                                                                                                                                                                                                                                                                                                                                                                                                                                                                                                                                                                                                                                                                                                                                                                                                                                                                                                                                                                                                                                                                                                                                                                                                                                                                                                                                                                                                                                                                                                                                                                                                                                                                                                                                                                                                                                                                                                                                                                                                                                                                                                                                                                                                                                                                                                                                                                                                                                                                                                                                                                                                                                                                                                                                                                                                                                                                                                                                                                                                                                                                                                                                                                                                                                                                                                                                                                                                                                                                                                                                                                                                                                                                                                                                                                                                                                                                                                                                                                                                                                                                                                                                                                                                                                                                                                                                                                                                                                                                                                                                                                                                                                                                                                                                                                                                                                                                                                                                                                                                                                                                                                                                                                                                                                                                                                                                                                                                                                                                                                                                                                                                                                                                                                                                                                                                                                                                                                                                                                                                                                                                                                                                                                                                                                                                                                                                                                                                                                                                                                                                                                                                                                                                                                                                                                                                                                                                                                                                                                                                                                                                                                                                                                                                                                                                                                                                                                                                                                                                                                                                                                                                                                                                                                                                                                                                                                                                                                                                                                                                                                                                                                                                                                                                                                                                                                                                                                                                                                                                                                                                                                                                                                                                                                                                                                                                                                                                                                                                                                                                                                                                                                                                                                                                                                                                                                                                                                                                                                                                                                                                                                                                                                                                                                                                                                                                                                                                                                                                                                                                                                                                                                                                                                                                                                                                                                                                                                                                                                                                                                                                                                                                                                                                                                                                                                                                                                                                                                                                                                                                                                                                                                                                                                                                                                                                                                                                                                                                                                                                                                                                                                                                                                                                                                                                                                                                                                                                                                                                                                                                                                                                                                                                                                                                                                                                                                                                                                                                                                                                                                                                                                                                                                                                                                                                                                                                                                                                                                                                                                                                                                                                                                                                                                                                                                                                                                                                                                                                                                                                                                                                                     | Lifebriain Covid Labor GmbH                                                                                  | Lifebriain Covid Labor GmbH                                                                                          | Filip Sima                                                                                                                                                                                                                                                                                                                                                                                                                                                                                                                                                                                                                                                                                                                                                                                                                                                                                                                                                                                                                                                   |
| EPI_ISL_6821008; EPI_ISL_6916148; EPI_ISL_7023724; EPI_ISL_7144808; EPI_ISL_7144998; EPI_ISL_7148837; EPI_ISL_7187307; EPI_ISL_7200868; EPI_ISL_7290346; EPI_ISL_7293790; EPI_ISL_7293812; EPI_ISL_7293816; EPI_ISL_7293881; EPI_ISL_7293889; EPI_ISL_7293903; EPI_ISL_7294032; EPI_ISL_7294185; EPI_ISL_7296873; EPI_ISL_7301592; EPI_ISL_7301662; EPI_ISL_7305287; EPI_ISL_7344013; EPI_ISL_7344598; EPI_ISL_7344677; EPI_ISL_7344684; EPI_ISL_7350102; EPI_ISL_7350107; EPI_ISL_7350108; EPI_ISL_7350109; EPI_ISL_7350110; EPI_ISL_7350111; EPI_ISL_7350112; EPI_ISL_7350113; EPI_ISL_7350114; EPI_ISL_7350115; EPI_ISL_7350116; EPI_ISL_7350117; EPI_ISL_7350118; EPI_ISL_7350119; EPI_ISL_7350120; EPI_ISL_7350121; EPI_ISL_7350122; EPI_ISL_7350123; EPI_ISL_7350124; EPI_ISL_7350125; EPI_ISL_7350126; EPI_ISL_7350127; EPI_ISL_7350128; EPI_ISL_7350129; EPI_ISL_7350130; EPI_ISL_7350131; EPI_ISL_7350132; EPI_ISL_7350133; EPI_ISL_7350134; EPI_ISL_7350135; EPI_ISL_7350136; EPI_ISL_7350137; EPI_ISL_7350138; EPI_ISL_7350139; EPI_ISL_7350140; EPI_ISL_7350141; EPI_ISL_7350142; EPI_ISL_7350143; EPI_ISL_7350144; EPI_ISL_7350145; EPI_ISL_7350146; EPI_ISL_7350147; EPI_ISL_7350148; EPI_ISL_7350149; EPI_ISL_7350150; EPI_ISL_7350151; EPI_ISL_7350152; EPI_ISL_7350153; EPI_ISL_7350154; EPI_ISL_7350155; EPI_ISL_7350156; EPI_ISL_7350157; EPI_ISL_7350158; EPI_ISL_7350159; EPI_ISL_7350160; EPI_ISL_7350161; EPI_ISL_7350162; EPI_ISL_7350163; EPI_ISL_7350164; EPI_ISL_7350165; EPI_ISL_7350166; EPI_ISL_7350167; EPI_ISL_7350168; EPI_ISL_7350169; EPI_ISL_7350170; EPI_ISL_7350171; EPI_ISL_7350172; EPI_ISL_7350173; EPI_ISL_7350174; EPI_ISL_7350175; EPI_ISL_7350176; EPI_ISL_7350177; EPI_ISL_7350178; EPI_ISL_7350179; EPI_ISL_7350180; EPI_ISL_7350181; EPI_ISL_7350182; EPI_ISL_7350183; EPI_ISL_7350184; EPI_ISL_7350185; EPI_ISL_7350186; EPI_ISL_7350187; EPI_ISL_7350188; EPI_ISL_7350189; EPI_ISL_7350190; EPI_ISL_7350191; EPI_ISL_7350192; EPI_ISL_7350193; EPI_ISL_7350194; EPI_ISL_7350195; EPI_ISL_7350196; EPI_ISL_7350197; EPI_ISL_7350198; EPI_ISL_7350199; EPI_ISL_7350200; EPI_ISL_7350201; EPI_ISL_7350202; EPI_ISL_7350203; EPI_ISL_7350204; EPI_ISL_7350205; EPI_ISL_7350206; EPI_ISL_7350207; EPI_ISL_7350208; EPI_ISL_7350209; EPI_ISL_7350210; EPI_ISL_7350211; EPI_ISL_7350212; EPI_ISL_7350213; EPI_ISL_7350214; EPI_ISL_7350215; EPI_ISL_7350216; EPI_ISL_7350217; EPI_ISL_7350218; EPI_ISL_7350219; EPI_ISL_7350220; EPI_ISL_7350221; EPI_ISL_7350222; EPI_ISL_7350223; EPI_ISL_7350224; EPI_ISL_7350225; EPI_ISL_7350226; EPI_ISL_7350227; EPI_ISL_7350228; EPI_ISL_7350229; EPI_ISL_7350230; EPI_ISL_7350231; EPI_ISL_7350232; EPI_ISL_7350233; EPI_ISL_7350234; EPI_ISL_7350235; EPI_ISL_7350236; EPI_ISL_7350237; EPI_ISL_7350238; EPI_ISL_7350239; EPI_ISL_7350240; EPI_ISL_7350241; EPI_ISL_7350242; EPI_ISL_7350243; EPI_ISL_7350244; EPI_ISL_7350245; EPI_ISL_7350246; EPI_ISL_7350247; EPI_ISL_7350248; EPI_ISL_7350249; EPI_ISL_7350250; EPI_ISL_7350251; EPI_ISL_7350252; EPI_ISL_7350253; EPI_ISL_7350254; EPI_ISL_7350255; EPI_ISL_7350256; EPI_ISL_7350257; EPI_ISL_7350258; EPI_ISL_7350259; EPI_ISL_7350260; EPI_ISL_7350261; EPI_ISL_7350262; EPI_ISL_7350263; EPI_ISL_7350264; EPI_ISL_7350265; EPI_ISL_7350266; EPI_ISL_7350267; EPI_ISL_7350268; EPI_ISL_7350269; EPI_ISL_7350270; EPI_ISL_7350271; EPI_ISL_7350272; EPI_ISL_7350273; EPI_ISL_7350274; EPI_ISL_7350275; EPI_ISL_7350276; EPI_ISL_7350277; EPI_ISL_7350278; EPI_ISL_7350279; EPI_ISL_7350280; EPI_ISL_7350281; EPI_ISL_7350282; EPI_ISL_7350283; EPI_ISL_7350284; EPI_ISL_7350285; EPI_ISL_7350286; EPI_ISL_7350287; EPI_ISL_7350288; EPI_ISL_7350289; EPI_ISL_7350290; EPI_ISL_7350291; EPI_ISL_7350292; EPI_ISL_7350293; EPI_ISL_7350294; EPI_ISL_7350295; EPI_ISL_7350296; EPI_ISL_7350297; EPI_ISL_7350298; EPI_ISL_7350299; EPI_ISL_7350300; EPI_ISL_7350301; EPI_ISL_7350302; EPI_ISL_7350303; EPI_ISL_7350304; EPI_ISL_7350305; EPI_ISL_7350306; EPI_ISL_7350307; EPI_ISL_7350308; EPI_ISL_7350309; EPI_ISL_7350310; EPI_ISL_7350311; EPI_ISL_7350312; EPI_ISL_7350313; EPI_ISL_7350314; EPI_ISL_7350315; EPI_ISL_7350316; EPI_ISL_7350317; EPI_ISL_7350318; EPI_ISL_7350319; EPI_ISL_7350320; EPI_ISL_7350321; EPI_ISL_7350322; EPI_ISL_7350323; EPI_ISL_7350324; EPI_ISL_7350325; EPI_ISL_7350326; EPI_ISL_7350327; EPI_ISL_7350328; EPI_ISL_7350329; EPI_ISL_7350330; EPI_ISL_7350331; EPI_ISL_7350332; EPI_ISL_7350333; EPI_ISL_7350334; EPI_ISL_7350335; EPI_ISL_7350336; EPI_ISL_7350337; EPI_ISL_7350338; EPI_ISL_7350339; EPI_ISL_7350340; EPI_ISL_7350341; EPI_ISL_7350342; EPI_ISL_7350343; EPI_ISL_7350344; EPI_ISL_7350345; EPI_ISL_7350346; EPI_ISL_7350347; EPI_ISL_7350348; EPI_ISL_7350349; EPI_ISL_7350350; EPI_ISL_7350351; EPI_ISL_7350352; EPI_ISL_7350353; EPI_ISL_7350354; EPI_ISL_7350355; EPI_ISL_7350356; EPI_ISL_7350357; EPI_ISL_7350358; EPI_ISL_7350359; EPI_ISL_7350360; EPI_ISL_7350361; EPI_ISL_7350362; EPI_ISL_7350363; EPI_ISL_7350364; EPI_ISL_7350365; EPI_ISL_7350366; EPI_ISL_7350367; EPI_ISL_7350368; EPI_ISL_7350369; EPI_ISL_7350370; EPI_ISL_7350371; EPI_ISL_7350372; EPI_ISL_7350373; EPI_ISL_7350374; EPI_ISL_7350375; EPI_ISL_7350376; EPI_ISL_7350377; EPI_ISL_7350378; EPI_ISL_7350379; EPI_ISL_7350380; EPI_ISL_7350381; EPI_ISL_7350382; EPI_ISL_7350383; EPI_ISL_7350384; EPI_ISL_7350385; EPI_ISL_7350386; EPI_ISL_7350387; EPI_ISL_7350388; EPI_ISL_7350389; EPI_ISL_7350390; EPI_ISL_7350391; EPI_ISL_7350392; EPI_ISL_7350393; EPI_ISL_7350394; EPI_ISL_7350395; EPI_ISL_7350396; EPI_ISL_7350397; EPI_ISL_7350398; EPI_ISL_7350399; EPI_ISL_7350400; EPI_ISL_7350401; EPI_ISL_7350402; EPI_ISL_7350403; EPI_ISL_7350404; EPI_ISL_7350405; EPI_ISL_7350406; EPI_ISL_7350407; EPI_ISL_7350408; EPI_ISL_7350409; EPI_ISL_7350410; EPI_ISL_7350411; EPI_ISL_7350412; EPI_ISL_7350413; EPI_ISL_7350414; EPI_ISL_7350415; EPI_ISL_7350416; EPI_ISL_7350417; EPI_ISL_7350418; EPI_ISL_7350419; EPI_ISL_7350420; EPI_ISL_7350421; EPI_ISL_7350422; EPI_ISL_7350423; EPI_ISL_7350424; EPI_ISL_7350425; EPI_ISL_7350426; EPI_ISL_7350427; EPI_ISL_7350428; EPI_ISL_7350429; EPI_ISL_7350430; EPI_ISL_7350431; EPI_ISL_7350432; EPI_ISL_7350433; EPI_ISL_7350434; EPI_ISL_7350435; EPI_ISL_7350436; EPI_ISL_7350437; EPI_ISL_7350438; EPI_ISL_7350439; EPI_ISL_7350440; EPI_ISL_7350441; EPI_ISL_7350442; EPI_ISL_7350443; EPI_ISL_7350444; EPI_ISL_7350445; EPI_ISL_7350446; EPI_ISL_7350447; EPI_ISL_7350448; EPI_ISL_7350449; EPI_ISL_7350450; EPI_ISL_7350451; EPI_ISL_7350452; EPI_ISL_7350453; EPI_ISL_7350454; EPI_ISL_7350455; EPI_ISL_7350456; EPI_ISL_7350457; EPI_ISL_7350458; EPI_ISL_7350459; EPI_ISL_7350460; EPI_ISL_7350461; EPI_ISL_7350462; EPI_ISL_7350463; EPI_ISL_7350464; EPI_ISL_7350465; EPI_ISL_7350466; EPI_ISL_7350467; EPI_ISL_7350468; EPI_ISL_7350469; EPI_ISL_7350470; EPI_ISL_7350471; EPI_ISL_7350472; EPI_ISL_7350473; EPI_ISL_7350474; EPI_ISL_7350475; EPI_ISL_7350476; EPI_ISL_7350477; EPI_ISL_7350478; EPI_ISL_7350479; EPI_ISL_7350480; EPI_ISL_7350481; EPI_ISL_7350482; EPI_ISL_7350483; EPI_ISL_7350484; EPI_ISL_7350485; EPI_ISL_7350486; EPI_ISL_7350487; EPI_ISL_7350488; EPI_ISL_7350489; EPI_ISL_7350490; EPI_ISL_7350491; EPI_ISL_7350492; EPI_ISL_7350493; EPI_ISL_7350494; EPI_ISL_7350495; EPI_ISL_7350496; EPI_ISL_7350497; EPI_ISL_7350498; EPI_ISL_7350499; EPI_ISL_7350500; EPI_ISL_7350501; EPI_ISL_7350502; EPI_ISL_7350503; EPI_ISL_7350504; EPI_ISL_7350505; EPI_ISL_7350506; EPI_ISL_7350507; EPI_ISL_7350508; EPI_ISL_7350509; EPI_ISL_7350510; EPI_ISL_7350511; EPI_ISL_7350512; EPI_ISL_7350513; EPI_ISL_7350514; EPI_ISL_7350515; EPI_ISL_7350516; EPI_ISL_7350517; EPI_ISL_7350518; EPI_ISL_7350519; EPI_ISL_7350520; EPI_ISL_7350521; EPI_ISL_7350522; EPI_ISL_7350523; EPI_ISL_7350524; EPI_ISL_7350525; EPI_ISL_7350526; EPI_ISL_7350527; EPI_ISL_7350528; EPI_ISL_7350529; EPI_ISL_7350530; EPI_ISL_7350531; EPI_ISL_7350532; EPI_ISL_7350533; EPI_ISL_7350534; EPI_ISL_7350535; EPI_ISL_7350536; EPI_ISL_7350537; EPI_ISL_7350538; EPI_ISL_7350539; EPI_ISL_7350540; EPI_ISL_7350541; EPI_ISL_7350542; EPI_ISL_7350543; EPI_ISL_7350544; EPI_ISL_7350545; EPI_ISL_7350546; EPI_ISL_7350547; EPI_ISL_7350548; EPI_ISL_7350549; EPI_ISL_7350550; EPI_ISL_7350551; EPI_ISL_7350552; EPI_ISL_7350553; EPI_ISL_7350554; EPI_ISL_7350555; EPI_ISL_7350556; EPI_ISL_7350557; EPI_ISL_7350558; EPI_ISL_7350559; EPI_ISL_7350560; EPI_ISL_7350561; EPI_ISL_7350562; EPI_ISL_7350563; EPI_ISL_7350564; EPI_ISL_7350565; EPI_ISL_7350566; EPI_ISL_7350567; EPI_ISL_7350568; EPI_ISL_7350569; EPI_ISL_7350570; EPI_ISL_7350571; EPI_ISL_7350572; EPI_ISL_7350573; EPI_ISL_7350574; EPI_ISL_7350575; EPI_ISL_7350576; EPI_ISL_7350577; EPI_ISL_7350578; EPI_ISL_7350579; EPI_ISL_7350580; EPI_ISL_7350581; EPI_ISL_7350582; EPI_ISL_7350583; EPI_ISL_7350584; EPI_ISL_7350585; EPI_ISL_7350586; EPI_ISL_7350587; EPI_ISL_7350588; EPI_ISL_7350589; EPI_ISL_7350590; EPI_ISL_7350591; EPI_ISL_7350592; EPI_ISL_7350593; EPI_ISL_7350594; EPI_ISL_7350595; EPI_ISL_7350596; EPI_ISL_7350597; EPI_ISL_7350598; EPI_ISL_7350599; EPI_ISL_7350600; EPI_ISL_7350601; EPI_ISL_7350602; EPI_ISL_7350603; EPI_ISL_7350604; EPI_ISL_7350605; EPI_ISL_7350606; EPI_ISL_7350607; EPI_ISL_7350608; EPI_ISL_7350609; EPI_ISL_7350610; EPI_ISL_7350611; EPI_ISL_7350612; EPI_ISL_7350613; EPI_ISL_7350614; EPI_ISL_7350615; EPI_ISL_7350616; EPI_ISL_7350617; EPI_ISL_7350618; EPI_ISL_7350619; EPI_ISL_7350620; EPI_ISL_7350621; EPI_ISL_7350622; EPI_ISL_7350623; EPI_ISL_7350624; EPI_ISL_7350625; EPI_ISL_7350626; EPI_ISL_7350627; EPI_ISL_7350628; EPI_ISL_7350629; EPI_ISL_7350630; EPI_ISL_7350631; EPI_ISL_7350632; EPI_ISL_7350633; EPI_ISL_7350634; EPI_ISL_7350635; EPI_ISL_7350636; EPI_ISL_7350637; EPI_ISL_7350638; EPI_ISL_7350639; EPI_ISL_7350640; EPI_ISL_7350641; EPI_ISL_7350642; EPI_ISL_7350643; EPI_ISL_7350644; EPI_ISL_7350645; EPI_ISL_7350646; EPI_ISL_7350647; EPI_ISL_7350648; EPI_ISL_7350649; EPI_ISL_7350650; EPI_ISL_7350651; EPI_ISL_7350652; EPI_ISL_7350653; EPI_ISL_7350654; EPI_ISL_7350655; EPI_ISL_7350656; EPI_ISL_7350657; EPI_ISL_7350658; EPI_ISL_7350659; EPI_ISL_7350660; EPI_ISL_7350661; EPI_ISL_7350662; EPI_ISL_7350663; EPI_ISL_7350664; EPI_ISL_7350665; EPI_ISL_7350666; EPI_ISL_7350667; EPI_ISL_7350668; EPI_ISL_7350669; EPI_ISL_7350670; EPI_ISL_7350671; EPI_ISL_7350672; EPI_ISL_7350673; EPI_ISL_7350674; EPI_ISL_7350675; EPI_ISL_7350676; EPI_ISL_7350677; EPI_ISL_7350678; EPI_ISL_7350679; EPI_ISL_7350680; EPI_ISL_7350681; EPI_ISL_7350682; EPI_ISL_7350683; EPI_ISL_7350684; EPI_ISL_7350685; EPI_ISL_7350686; EPI_ISL_7350687; EPI_ISL_7350688; EPI_ISL_7350689; EPI_ISL_7350690; EPI_ISL_7350691; EPI_ISL_7350692; EPI_ISL_7350693; EPI_ISL_7350694; EPI_ISL_7350695; EPI_ISL_7350696; EPI_ISL_7350697; EPI_ISL_7350698; EPI_ISL_7350699; EPI_ISL_7350700; EPI_ISL_7350701; EPI_ISL_7350702; EPI_ISL_7350703; EPI_ISL_7350704; EPI_ISL_7350705; EPI_ISL_7350706; EPI_ISL_7350707; EPI_ISL_7350708; EPI_ISL_7350709; EPI_ISL_7350710; EPI_ISL_7350711; EPI_ISL_7350712; EPI_ISL_7350713; EPI_ISL_7350714; EPI_ISL_7350715; EPI_ISL_7350716; EPI_ISL_7350717; EPI_ISL_7350718; EPI_ISL_7350719; EPI_ISL_7350720; EPI_ISL_7350721; EPI_ISL_7350722; EPI_ISL_7350723; EPI_ISL_7350724; EPI_ISL_7350725; EPI_ISL_7350726; EPI_ISL_7350727; EPI_ISL_7350728; EPI_ISL_7350729; EPI_ISL_7350730; EPI_ISL_7350731; EPI_ISL_7350732; EPI_ISL_7350733; EPI_ISL_7350734; EPI_ISL_7350735; EPI_ISL_7350736; EPI_ISL_7350737; EPI_ISL_7350738; EPI_ISL_7350739; EPI_ISL_7350740; EPI_ISL_7350741; EPI_ISL_7350742; EPI_ISL_7350743; EPI_ISL_7350744; EPI_ISL_7350745; EPI_ISL_7350746; EPI_ISL_7350747; EPI_ISL_7350748; EPI_ISL_7350749; EPI_ISL_7350750; EPI_ISL_7350751; EPI_ISL_7350752; EPI_ISL_7350753; EPI_ISL_7350754; EPI_ISL_7350755; EPI_ISL_7350756; EPI_ISL_7350757; EPI_ISL_7350758; EPI_ISL_7350759; EPI_ISL_7350760; EPI_ISL_7350761; EPI_ISL_7350762; EPI_ISL_7350763; EPI_ISL_7350764; EPI_ISL_7350765; EPI_ISL_7350766; EPI_ISL_7350767; EPI_ISL_7350768; EPI_ISL_7350769; EPI_ISL_7350770; EPI_ISL_7350771; EPI_ISL_7350772; EPI_ISL_7350773; EPI_ISL_7350774; EPI_ISL_7350775; EPI_ISL_7350776; EPI_ISL_7350777; EPI_ISL_7350778; EPI_ISL_7350779; EPI_ISL_7350780; EPI_ISL_7350781; EPI_ISL_7350782; EPI_ISL_7350783; EPI_ISL_7350784; EPI_ISL_7350785; EPI_ISL_7350786; EPI_ISL_7350787; EPI_ISL_7350788; EPI_ISL_7350789; EPI_ISL_7350790; EPI_ISL_7350791; EPI_ISL_7350792; EPI_ISL_7350793; EPI_ISL_7350794; EPI_ISL_7350795; EPI_ISL_7350796; EPI_ISL_7350797; EPI_ISL_7350798; EPI_ISL_7350799; EPI_ISL_7350800; EPI_ISL_7350801; EPI_ISL_7350802; EPI_ISL_7350803; EPI_ISL_7350804; EPI_ISL_7350805; EPI_ISL_7350806; EPI_ISL_7350807; EPI_ISL_7350808; EPI_ISL_7350809; EPI_ISL_7350810; EPI_ISL_7350811; EPI_ISL_7350812; EPI_ISL_7350813; EPI_ISL_7350814; EPI_ISL_7350815; EPI_ISL_7350816; EPI_ISL_7350817; EPI_ISL_7350818; EPI_ISL_7350819; EPI_ISL_7350820; EPI_ISL_7350821; EPI_ISL_7350822; EPI_ISL_7350823; EPI_ISL_7350824; EPI_ISL_7350825; EPI_ISL_7350826; EPI_ISL_7350827; EPI_ISL_7350828; EPI_ISL_7350829; EPI_ISL_7350830; EPI_ISL_7350831; EPI_ISL_7350832; EPI_ISL_7350833; EPI_ISL_7350834; EPI_ISL_7350835; EPI_ISL_7350836; EPI_ISL_7350837; EPI_ISL_7350838; EPI_ISL_7350839; EPI_ISL_7350840; EPI_ISL_7350841; EPI_ISL_7350842; EPI_ISL_7350843; EPI_ISL_7350844; EPI_ISL_7350845; EPI_ISL_7350846; EPI_ISL_7350847; EPI_ISL_7350848; EPI_ISL_7350849; EPI_ISL_7350850; EPI_ISL_7350851; EPI_ISL_7350852; EPI_ISL_7350853; EPI_ISL_7350854; EPI_ISL_7350855; EPI_ISL_7350856; EPI_ISL_7350857; EPI_ISL_7350858; EPI_ISL_7350859; EPI_ISL_7350860; EPI_ISL_7350861; EPI_ISL_7350862; EPI_ISL_7350863; EPI_ISL_7350864; EPI_ISL_7350865; EPI_ISL_7350866; EPI_ISL_7350867; EPI_ISL_7350868; EPI_ISL_7350869; EPI_ISL_7350870; EPI_ISL_7350871; EPI_ISL_7350872; EPI_ISL_7350873; EPI_ISL_7350874; EPI_ISL_7350875; EPI_ISL_7350876; EPI_ISL_7350877; EPI_ISL |                                                                                                              |                                                                                                                      |                                                                                                                                                                                                                                                                                                                                                                                                                                                                                                                                                                                                                                                                                                                                                                                                                                                                                                                                                                                                                                                              |



|                                                                                                                                                                                                                                                                                                                                                                                                                                                                                                                                                                                                                                                                                                                                                                                                                                                                                                                                                                                                                                                                                                                                                                                                                                                                                                                                                                                                                                                                                                                                                                                                                                                                                                                                                                                                                                                                                                                                                                                                                                                                                                                                                                                                                                                                                                                                                                                                                                                                                                                                                                                                                                                                                                                                                                                                                                                                                                                                                                                                                                                                                                                                                                                                                                                                                                                                                                                                                                                                                                                                                                                                            |                                                                                     |                                                                                                                                                       |                                                                                                                                                                                                                                                                                                                                                                                                                                                                          |
|------------------------------------------------------------------------------------------------------------------------------------------------------------------------------------------------------------------------------------------------------------------------------------------------------------------------------------------------------------------------------------------------------------------------------------------------------------------------------------------------------------------------------------------------------------------------------------------------------------------------------------------------------------------------------------------------------------------------------------------------------------------------------------------------------------------------------------------------------------------------------------------------------------------------------------------------------------------------------------------------------------------------------------------------------------------------------------------------------------------------------------------------------------------------------------------------------------------------------------------------------------------------------------------------------------------------------------------------------------------------------------------------------------------------------------------------------------------------------------------------------------------------------------------------------------------------------------------------------------------------------------------------------------------------------------------------------------------------------------------------------------------------------------------------------------------------------------------------------------------------------------------------------------------------------------------------------------------------------------------------------------------------------------------------------------------------------------------------------------------------------------------------------------------------------------------------------------------------------------------------------------------------------------------------------------------------------------------------------------------------------------------------------------------------------------------------------------------------------------------------------------------------------------------------------------------------------------------------------------------------------------------------------------------------------------------------------------------------------------------------------------------------------------------------------------------------------------------------------------------------------------------------------------------------------------------------------------------------------------------------------------------------------------------------------------------------------------------------------------------------------------------------------------------------------------------------------------------------------------------------------------------------------------------------------------------------------------------------------------------------------------------------------------------------------------------------------------------------------------------------------------------------------------------------------------------------------------------------------------|-------------------------------------------------------------------------------------|-------------------------------------------------------------------------------------------------------------------------------------------------------|--------------------------------------------------------------------------------------------------------------------------------------------------------------------------------------------------------------------------------------------------------------------------------------------------------------------------------------------------------------------------------------------------------------------------------------------------------------------------|
| EPI_ISL_7193991,<br>EPI_ISL_7286479,<br>EPI_ISL_7516233,<br>EPI_ISL_7519931,<br>EPI_ISL_7527590,<br>EPI_ISL_7527959<br>EPI_ISL_7501186                                                                                                                                                                                                                                                                                                                                                                                                                                                                                                                                                                                                                                                                                                                                                                                                                                                                                                                                                                                                                                                                                                                                                                                                                                                                                                                                                                                                                                                                                                                                                                                                                                                                                                                                                                                                                                                                                                                                                                                                                                                                                                                                                                                                                                                                                                                                                                                                                                                                                                                                                                                                                                                                                                                                                                                                                                                                                                                                                                                                                                                                                                                                                                                                                                                                                                                                                                                                                                                                     | Molekylær Medicinsk Afdeling,<br>Aarhus University Hospital, Aarhus,<br>Denmark     | France SUD<br>Statens Serum Institut Bioinformatics<br>and Microbial Genomics<br>University                                                           | Chalvignac; Thibault Corsin; Thibault Gouriran<br>Danish Covid-19 Genome Consortium                                                                                                                                                                                                                                                                                                                                                                                      |
|                                                                                                                                                                                                                                                                                                                                                                                                                                                                                                                                                                                                                                                                                                                                                                                                                                                                                                                                                                                                                                                                                                                                                                                                                                                                                                                                                                                                                                                                                                                                                                                                                                                                                                                                                                                                                                                                                                                                                                                                                                                                                                                                                                                                                                                                                                                                                                                                                                                                                                                                                                                                                                                                                                                                                                                                                                                                                                                                                                                                                                                                                                                                                                                                                                                                                                                                                                                                                                                                                                                                                                                                            |                                                                                     |                                                                                                                                                       |                                                                                                                                                                                                                                                                                                                                                                                                                                                                          |
|                                                                                                                                                                                                                                                                                                                                                                                                                                                                                                                                                                                                                                                                                                                                                                                                                                                                                                                                                                                                                                                                                                                                                                                                                                                                                                                                                                                                                                                                                                                                                                                                                                                                                                                                                                                                                                                                                                                                                                                                                                                                                                                                                                                                                                                                                                                                                                                                                                                                                                                                                                                                                                                                                                                                                                                                                                                                                                                                                                                                                                                                                                                                                                                                                                                                                                                                                                                                                                                                                                                                                                                                            |                                                                                     |                                                                                                                                                       |                                                                                                                                                                                                                                                                                                                                                                                                                                                                          |
|                                                                                                                                                                                                                                                                                                                                                                                                                                                                                                                                                                                                                                                                                                                                                                                                                                                                                                                                                                                                                                                                                                                                                                                                                                                                                                                                                                                                                                                                                                                                                                                                                                                                                                                                                                                                                                                                                                                                                                                                                                                                                                                                                                                                                                                                                                                                                                                                                                                                                                                                                                                                                                                                                                                                                                                                                                                                                                                                                                                                                                                                                                                                                                                                                                                                                                                                                                                                                                                                                                                                                                                                            |                                                                                     |                                                                                                                                                       |                                                                                                                                                                                                                                                                                                                                                                                                                                                                          |
|                                                                                                                                                                                                                                                                                                                                                                                                                                                                                                                                                                                                                                                                                                                                                                                                                                                                                                                                                                                                                                                                                                                                                                                                                                                                                                                                                                                                                                                                                                                                                                                                                                                                                                                                                                                                                                                                                                                                                                                                                                                                                                                                                                                                                                                                                                                                                                                                                                                                                                                                                                                                                                                                                                                                                                                                                                                                                                                                                                                                                                                                                                                                                                                                                                                                                                                                                                                                                                                                                                                                                                                                            |                                                                                     |                                                                                                                                                       |                                                                                                                                                                                                                                                                                                                                                                                                                                                                          |
| EPI_ISL_7545652, EPI_ISL_7545653, EPI_ISL_7545654, EPI_ISL_7545658, EPI_ISL_7545660, EPI_ISL_7545661, EPI_ISL_7545662, EPI_ISL_7545663, EPI_ISL_7545664, EPI_ISL_7545665, EPI_ISL_7545666, EPI_ISL_7545667, EPI_ISL_7545668, EPI_ISL_7545669, EPI_ISL_7545670, EPI_ISL_7545671, EPI_ISL_7545673, EPI_ISL_7545674, EPI_ISL_7545675                                                                                                                                                                                                                                                                                                                                                                                                                                                                                                                                                                                                                                                                                                                                                                                                                                                                                                                                                                                                                                                                                                                                                                                                                                                                                                                                                                                                                                                                                                                                                                                                                                                                                                                                                                                                                                                                                                                                                                                                                                                                                                                                                                                                                                                                                                                                                                                                                                                                                                                                                                                                                                                                                                                                                                                                                                                                                                                                                                                                                                                                                                                                                                                                                                                                          | see above                                                                           | NHLS Livingstone Laboratory                                                                                                                           | Arisha Maharaj; Giandhari J; Naidoo Y; Oluwakemi Laguda-Akingba and Nokukhanya Mdlatlose; Pillay S; Ramphal U; Ramphal Y; San JE; Tegally H; Tshiabula D; Wilkinson E; de Oliveira T                                                                                                                                                                                                                                                                                     |
| EPI_ISL_7381208, EPI_ISL_7381209, EPI_ISL_7381210, EPI_ISL_7381211, EPI_ISL_7381212, EPI_ISL_7381213, EPI_ISL_7381214, EPI_ISL_7381215, EPI_ISL_7381216, EPI_ISL_7381217, EPI_ISL_7381218, EPI_ISL_7381219, EPI_ISL_7381220, EPI_ISL_7381221, EPI_ISL_7381222                                                                                                                                                                                                                                                                                                                                                                                                                                                                                                                                                                                                                                                                                                                                                                                                                                                                                                                                                                                                                                                                                                                                                                                                                                                                                                                                                                                                                                                                                                                                                                                                                                                                                                                                                                                                                                                                                                                                                                                                                                                                                                                                                                                                                                                                                                                                                                                                                                                                                                                                                                                                                                                                                                                                                                                                                                                                                                                                                                                                                                                                                                                                                                                                                                                                                                                                              | see above                                                                           | NHLS Port Elizabeth Laboratory                                                                                                                        | Arisha Maharaj; Giandhari J; Moir M; Naidoo Y; Oluwakemi Laguda-Akingba and Nokukhanya Mdlatlose; Pillay S; Ramphal U; Ramphal Y; San JE; Tegally H; Tshiabula D; Wilkinson E; de Oliveira T; van Wyk S                                                                                                                                                                                                                                                                  |
| EPI_ISL_7462390, EPI_ISL_7462391, EPI_ISL_7462392, EPI_ISL_7462393, EPI_ISL_7462397, EPI_ISL_7462398, EPI_ISL_7462399, EPI_ISL_7462400, EPI_ISL_7462401, EPI_ISL_7462402, EPI_ISL_7462403, EPI_ISL_7462404                                                                                                                                                                                                                                                                                                                                                                                                                                                                                                                                                                                                                                                                                                                                                                                                                                                                                                                                                                                                                                                                                                                                                                                                                                                                                                                                                                                                                                                                                                                                                                                                                                                                                                                                                                                                                                                                                                                                                                                                                                                                                                                                                                                                                                                                                                                                                                                                                                                                                                                                                                                                                                                                                                                                                                                                                                                                                                                                                                                                                                                                                                                                                                                                                                                                                                                                                                                                 | see above                                                                           | NHLS Universitas Academic                                                                                                                             | D Goedhals; Emmanuel Ogunbayo; MM Nyaga; MT Mogotsi; N Pthiga; PA Bester; Shannon Wilson; Susan Engelbrecht; T de Oliveira; Tongai Maponga; Wolfgang Preiser                                                                                                                                                                                                                                                                                                             |
| EPI_ISL_7605460,<br>EPI_ISL_7605516<br>EPI_ISL_7568605,<br>EPI_ISL_7568608                                                                                                                                                                                                                                                                                                                                                                                                                                                                                                                                                                                                                                                                                                                                                                                                                                                                                                                                                                                                                                                                                                                                                                                                                                                                                                                                                                                                                                                                                                                                                                                                                                                                                                                                                                                                                                                                                                                                                                                                                                                                                                                                                                                                                                                                                                                                                                                                                                                                                                                                                                                                                                                                                                                                                                                                                                                                                                                                                                                                                                                                                                                                                                                                                                                                                                                                                                                                                                                                                                                                 | NIDOH, Public Health and<br>Environmental Laboratories<br>NYU Langone Health        | NL_PHEL<br>Departments of Pathology and<br>Medicine, New York University School<br>of Medicine                                                        | Allison Roder; Byeong Jeong; Chelsea San Filippo; Dana Woell; Jacquelyn Deverell; Lindsey Bodnar; Maria-Magdalene Pugliese; Mohammad M, Ali; Ryan Pechucki; Shiv K, Verma<br>Adriana Heguy; Christian Marier; Dacia Dimartino; Emily Guzman; Gael Westby; Guigui Wang; Paul Zappile; Peter Meyn; Sitharam Ramaswami; Yutong Zhang                                                                                                                                        |
| EPI_ISL_7285023                                                                                                                                                                                                                                                                                                                                                                                                                                                                                                                                                                                                                                                                                                                                                                                                                                                                                                                                                                                                                                                                                                                                                                                                                                                                                                                                                                                                                                                                                                                                                                                                                                                                                                                                                                                                                                                                                                                                                                                                                                                                                                                                                                                                                                                                                                                                                                                                                                                                                                                                                                                                                                                                                                                                                                                                                                                                                                                                                                                                                                                                                                                                                                                                                                                                                                                                                                                                                                                                                                                                                                                            | National Centre for Disease Control<br>(NCDC) Biotechnology Division,<br>Delhi      | NCDC Delhi, Biotechnology Division<br>INSACOG                                                                                                         | Hema Gogia; Hemlata Lall; Kalaivasan Ponnusamy; Mahesh S Dhar; Manoj K Singh; Meena Datta; Partha Rakshit; Preeti Madan; Priyanka Singh; Radhakrishnan V. S; Robin Marwal; Sandhya Kabra; Sujeet K Singh; Uma Sharma                                                                                                                                                                                                                                                     |
| EPI_ISL_7548907, EPI_ISL_7548908, EPI_ISL_7548911, EPI_ISL_7548912, EPI_ISL_7548913, EPI_ISL_7548915, EPI_ISL_7548916, EPI_ISL_7548917, EPI_ISL_7548918, EPI_ISL_7548919, EPI_ISL_7548920, EPI_ISL_7548921, EPI_ISL_7548922, EPI_ISL_7548924, EPI_ISL_7548925, EPI_ISL_7548926, EPI_ISL_7548927, EPI_ISL_7548928, EPI_ISL_7548929, EPI_ISL_7548930, EPI_ISL_7548932, EPI_ISL_7548933, EPI_ISL_7548934, EPI_ISL_7548935                                                                                                                                                                                                                                                                                                                                                                                                                                                                                                                                                                                                                                                                                                                                                                                                                                                                                                                                                                                                                                                                                                                                                                                                                                                                                                                                                                                                                                                                                                                                                                                                                                                                                                                                                                                                                                                                                                                                                                                                                                                                                                                                                                                                                                                                                                                                                                                                                                                                                                                                                                                                                                                                                                                                                                                                                                                                                                                                                                                                                                                                                                                                                                                     | see above                                                                           | National Health Laboratory                                                                                                                            | Arisha Maharaj; Giandhari J; Naidoo Y; Oluwakemi Laguda-Akingba and Nokukhanya Mdlatlose; Pillay S; Ramphal U; Ramphal Y; San JE; Tegally H; Tshiabula D; Wilkinson E; de Oliveira T; van Wyk S                                                                                                                                                                                                                                                                          |
| EPI_ISL_6795195, EPI_ISL_6795199, EPI_ISL_6795202, EPI_ISL_6795203, EPI_ISL_6795406, EPI_ISL_7015210, EPI_ISL_7015212, EPI_ISL_7015216, EPI_ISL_7015223, EPI_ISL_7015224, EPI_ISL_7015226, EPI_ISL_7015229, EPI_ISL_7015230, EPI_ISL_7310589, EPI_ISL_7310595, EPI_ISL_7310605, EPI_ISL_7310613, EPI_ISL_7310622, EPI_ISL_7310630, EPI_ISL_7310631, EPI_ISL_7310636, EPI_ISL_7310643, EPI_ISL_7310648, EPI_ISL_7310658, EPI_ISL_7310675, EPI_ISL_7310679, EPI_ISL_7310685, EPI_ISL_7310703, EPI_ISL_7310710, EPI_ISL_7310719, EPI_ISL_7310725, EPI_ISL_7310733, EPI_ISL_7310742, EPI_ISL_7310747, EPI_ISL_7358050, EPI_ISL_7358051, EPI_ISL_7358052, EPI_ISL_7358053, EPI_ISL_7358054, EPI_ISL_7358056, EPI_ISL_7358057, EPI_ISL_7358058, EPI_ISL_7358059, EPI_ISL_7358064, EPI_ISL_7358065, EPI_ISL_7358066, EPI_ISL_7358067, EPI_ISL_7358068, EPI_ISL_7358069, EPI_ISL_7358070, EPI_ISL_7358071, EPI_ISL_7358072, EPI_ISL_7358073, EPI_ISL_7358074, EPI_ISL_7358075, EPI_ISL_7358076, EPI_ISL_7358077, EPI_ISL_7358078, EPI_ISL_7358079, EPI_ISL_7358080, EPI_ISL_7358081, EPI_ISL_7358082, EPI_ISL_7358083, EPI_ISL_7358084, EPI_ISL_7358085, EPI_ISL_7358089, EPI_ISL_7358090, EPI_ISL_7358091, EPI_ISL_7358092, EPI_ISL_7358093, EPI_ISL_7381192, EPI_ISL_7381193, EPI_ISL_7381194, EPI_ISL_7381195, EPI_ISL_7381196, EPI_ISL_7381197, EPI_ISL_7381198, EPI_ISL_7381199, EPI_ISL_7381200, EPI_ISL_7381201, EPI_ISL_7381202, EPI_ISL_7381203, EPI_ISL_7381204, EPI_ISL_7381205, EPI_ISL_7381206, EPI_ISL_7381207, EPI_ISL_7545676, EPI_ISL_7545677, EPI_ISL_7545678, EPI_ISL_7545679, EPI_ISL_7545680, EPI_ISL_7545681, EPI_ISL_7545682, EPI_ISL_7545683, EPI_ISL_7545684, EPI_ISL_7545685, EPI_ISL_7545686, EPI_ISL_7545687, EPI_ISL_7545688, EPI_ISL_7545689, EPI_ISL_7545690, EPI_ISL_7545691, EPI_ISL_7545692, EPI_ISL_7545693, EPI_ISL_7545694, EPI_ISL_7545695, EPI_ISL_7545696, EPI_ISL_7545698, EPI_ISL_7545699, EPI_ISL_7545700, EPI_ISL_7545701, EPI_ISL_7545702, EPI_ISL_7545703, EPI_ISL_7545704, EPI_ISL_7545705, EPI_ISL_7545706, EPI_ISL_7545707, EPI_ISL_7545708, EPI_ISL_7545709, EPI_ISL_7545710, EPI_ISL_7545711, EPI_ISL_7545712, EPI_ISL_7545713, EPI_ISL_7545714, EPI_ISL_7545715, EPI_ISL_7545716, EPI_ISL_7545717, EPI_ISL_7545718, EPI_ISL_7545719, EPI_ISL_7545720, EPI_ISL_7545721, EPI_ISL_7545722, EPI_ISL_7545723, EPI_ISL_7545724, EPI_ISL_7545725, EPI_ISL_7545726, EPI_ISL_7545727, EPI_ISL_7545728, EPI_ISL_7545729, EPI_ISL_7545730, EPI_ISL_7545731, EPI_ISL_7545732, EPI_ISL_7545733, EPI_ISL_7545734, EPI_ISL_7545735, EPI_ISL_7545736, EPI_ISL_7545737, EPI_ISL_7545738, EPI_ISL_7545739, EPI_ISL_7545740, EPI_ISL_7545741, EPI_ISL_7545742, EPI_ISL_7545743, EPI_ISL_7545744, EPI_ISL_7545745, EPI_ISL_7545746, EPI_ISL_7545747, EPI_ISL_7545748, EPI_ISL_7545749, EPI_ISL_7545750, EPI_ISL_7545751, EPI_ISL_7545752, EPI_ISL_7545753, EPI_ISL_7545754, EPI_ISL_7545755, EPI_ISL_7545756, EPI_ISL_7545757, EPI_ISL_7545758, EPI_ISL_7545759, EPI_ISL_7545760, EPI_ISL_7545761, EPI_ISL_7545762, EPI_ISL_7545763, EPI_ISL_7545764, EPI_ISL_7545765, EPI_ISL_7545766, EPI_ISL_7545767, EPI_ISL_7545768, EPI_ISL_7545769, EPI_ISL_7545770, EPI_ISL_7545771, EPI_ISL_7545772, EPI_ISL_7545773, EPI_ISL_7545774, EPI_ISL_7545775, EPI_ISL_7545776, EPI_ISL_7545777, EPI_ISL_7545778, EPI_ISL_7545779, EPI_ISL_7545780, EPI_ISL_7545781, EPI_ISL_7545782, EPI_ISL_7545783, EPI_ISL_7545784, EPI_ISL_7545785, EPI_ISL_7545786, EPI_ISL_7545787, EPI_ISL_7545788, EPI_ISL_7545789, EPI_ISL_7545790, EPI_ISL_7545791, EPI_ISL_7545792, EPI_ISL_7545793, EPI_ISL_7545794 | see above                                                                           | National Health Laboratory Service,<br>Kwazulu-Natal, South Africa                                                                                    | Arisha Maharaj; Giandhari J; Moir M; Naidoo Y; Nokukhanya Mdlatlose; Pillay S; Ramphal U; Ramphal Y; San JE; Tegally H; Tshiabula D; Wilkinson E; de Oliveira T; van Wyk S                                                                                                                                                                                                                                                                                               |
| EPI_ISL_6829557                                                                                                                                                                                                                                                                                                                                                                                                                                                                                                                                                                                                                                                                                                                                                                                                                                                                                                                                                                                                                                                                                                                                                                                                                                                                                                                                                                                                                                                                                                                                                                                                                                                                                                                                                                                                                                                                                                                                                                                                                                                                                                                                                                                                                                                                                                                                                                                                                                                                                                                                                                                                                                                                                                                                                                                                                                                                                                                                                                                                                                                                                                                                                                                                                                                                                                                                                                                                                                                                                                                                                                                            | National Health Laboratory Service,<br>Kwazulu-Natal, South Africa                  | KRISP, KZN Research Innovation and<br>Sequencing Platform, UKZN.                                                                                      | Arisha Maharaj; Giandhari J; Lessells R; Moir M; Naidoo Y; Nokukhanya M; Pillay S; Ramphal U; Ramphal Y; San JE; Tegally H; Tshiabula D; Wilkinson E; de Oliveira T                                                                                                                                                                                                                                                                                                      |
| EPI_ISL_6795188,<br>EPI_ISL_6795189,<br>EPI_ISL_6795190,<br>EPI_ISL_6795191,<br>EPI_ISL_6795192,<br>EPI_ISL_6795193                                                                                                                                                                                                                                                                                                                                                                                                                                                                                                                                                                                                                                                                                                                                                                                                                                                                                                                                                                                                                                                                                                                                                                                                                                                                                                                                                                                                                                                                                                                                                                                                                                                                                                                                                                                                                                                                                                                                                                                                                                                                                                                                                                                                                                                                                                                                                                                                                                                                                                                                                                                                                                                                                                                                                                                                                                                                                                                                                                                                                                                                                                                                                                                                                                                                                                                                                                                                                                                                                        | National Health Laboratory Services,<br>Virology                                    | CERi, Centre for Epidemic Response<br>and Innovation, Stellenbosch University<br>and KRISP, KZN Research Innovation<br>and Sequencing Platform, UKZN. | Arisha Maharaj; Florette Treurnicht; Giandhari J; Kathleen Subramoney; Naidoo Y; Pillay S; Ramphal U; Ramphal Y; San JE; Tegally H; Tshiabula D; Wilkinson E; de Oliveira T                                                                                                                                                                                                                                                                                              |
| EPI_ISL_6699728, EPI_ISL_6699729, EPI_ISL_6699730, EPI_ISL_6699731, EPI_ISL_6699732, EPI_ISL_6699733, EPI_ISL_6699734, EPI_ISL_6699735, EPI_ISL_6699736, EPI_ISL_6699737, EPI_ISL_6699738, EPI_ISL_6699739, EPI_ISL_6699740, EPI_ISL_6699741, EPI_ISL_6699742, EPI_ISL_6699743, EPI_ISL_6699744, EPI_ISL_6699745, EPI_ISL_6699746, EPI_ISL_6699747, EPI_ISL_6699748, EPI_ISL_6699749, EPI_ISL_6699750, EPI_ISL_6699751, EPI_ISL_6699752, EPI_ISL_6699753, EPI_ISL_6699754, EPI_ISL_6699755, EPI_ISL_6699756, EPI_ISL_6699757, EPI_ISL_6699758, EPI_ISL_6699759, EPI_ISL_6699760, EPI_ISL_6699761, EPI_ISL_6699762, EPI_ISL_6699763, EPI_ISL_6699764, EPI_ISL_6699765, EPI_ISL_6699766, EPI_ISL_6699767, EPI_ISL_6699768, EPI_ISL_6699769, EPI_ISL_6699770, EPI_ISL_6699771, EPI_ISL_6782043, EPI_ISL_6782055, EPI_ISL_6782056, EPI_ISL_6782071, EPI_ISL_6782079, EPI_ISL_6782080, EPI_ISL_6782084, EPI_ISL_6782090, EPI_ISL_6782092, EPI_ISL_6810482, EPI_ISL_6810483, EPI_ISL_6810484, EPI_ISL_6810485, EPI_ISL_6810486, EPI_ISL_6810487                                                                                                                                                                                                                                                                                                                                                                                                                                                                                                                                                                                                                                                                                                                                                                                                                                                                                                                                                                                                                                                                                                                                                                                                                                                                                                                                                                                                                                                                                                                                                                                                                                                                                                                                                                                                                                                                                                                                                                                                                                                                                                                                                                                                                                                                                                                                                                                                                                                                                                                                                                  | see above                                                                           | National Health Laboratory Services,<br>Virology, Charlotte Makeke<br>Johannesburg hospital, Parktown,<br>Johannesburg, Gauteng                       | Arisha Maharaj; Avani Bharuthram; Bester P; Bhiman J; Engelbrecht S; Everatt J; Florette Treurnicht; Goedhals D; Hardie D; Hsiao M; Iranzadeh A; Kathleen Subramoney; Lessells R; Makatini Z; Maponga T; Mdlatlose N; Misana K; Moir M; NGS-SA (Scheepers C; Naidoo Y; Nkhensani Mleni; Nyaga M; Giandhari J; Oluwakemi M; Pillay S; Preiser W; Ramphal U; Ramphal Y; San JE; Tegally H; Tshiabula D; Venter M; Wilkinson E; Williamson C; de Oliveira T; von Gottberg A |
| EPI_ISL_6939033, EPI_ISL_6939034, EPI_ISL_6939035, EPI_ISL_6939036, EPI_ISL_6939038, EPI_ISL_6939039, EPI_ISL_6939041, EPI_ISL_6939042, EPI_ISL_6939043, EPI_ISL_6939044, EPI_ISL_6939045, EPI_ISL_6939046, EPI_ISL_6939047, EPI_ISL_6939048, EPI_ISL_6939049, EPI_ISL_6939050, EPI_ISL_6939051, EPI_ISL_6939052, EPI_ISL_6939053, EPI_ISL_6939054, EPI_ISL_6939056, EPI_ISL_6939057, EPI_ISL_6939058, EPI_ISL_6939059, EPI_ISL_6939060, EPI_ISL_6939061, EPI_ISL_6939062, EPI_ISL_6939063, EPI_ISL_6939064, EPI_ISL_6939065, EPI_ISL_6939066, EPI_ISL_6939067, EPI_ISL_6939068                                                                                                                                                                                                                                                                                                                                                                                                                                                                                                                                                                                                                                                                                                                                                                                                                                                                                                                                                                                                                                                                                                                                                                                                                                                                                                                                                                                                                                                                                                                                                                                                                                                                                                                                                                                                                                                                                                                                                                                                                                                                                                                                                                                                                                                                                                                                                                                                                                                                                                                                                                                                                                                                                                                                                                                                                                                                                                                                                                                                                            | see above                                                                           | National Influenza Centre                                                                                                                             | Benjamin B. Lindsey; Benjamin H. Foulkes; Bless Seyram Agbenyo; Bright Adu; Ernest Asiedu; Franklin Asiedu-Bekoe; Hilda Opoku Frempong; Ivy A. Asante; Joseph Oliver-Commye; Joyce Appiah-Kubi; Keren Okyereba Attiku; Linda Boatemaa; Loretta Kwashah; Matthew D. Parker; Michael Marks; Mildred Adusei-Poku; Quaneeta Mohhtar; Sharon Hsu; Thushan I. de Silva; William K. Ampong                                                                                      |
| EPI_ISL_7456448, EPI_ISL_7456450, EPI_ISL_7456451, EPI_ISL_7456452, EPI_ISL_7456453, EPI_ISL_7456454, EPI_ISL_7456455, EPI_ISL_7456456, EPI_ISL_7456457                                                                                                                                                                                                                                                                                                                                                                                                                                                                                                                                                                                                                                                                                                                                                                                                                                                                                                                                                                                                                                                                                                                                                                                                                                                                                                                                                                                                                                                                                                                                                                                                                                                                                                                                                                                                                                                                                                                                                                                                                                                                                                                                                                                                                                                                                                                                                                                                                                                                                                                                                                                                                                                                                                                                                                                                                                                                                                                                                                                                                                                                                                                                                                                                                                                                                                                                                                                                                                                    | see above                                                                           | National Institute for Communicable<br>Diseases Of The National Health<br>Laboratory Service                                                          | Amoako DG; Bhiman JN; Everatt J; Ismail A; Mahlangu B; Mnguni A; Mohale T; Ntuli N; Scheepers C; Wolter N                                                                                                                                                                                                                                                                                                                                                                |
| EPI_ISL_7605585, EPI_ISL_7605586, EPI_ISL_7605593, EPI_ISL_7605594, EPI_ISL_7605629, EPI_ISL_7605630, EPI_ISL_7605631, EPI_ISL_7605632, EPI_ISL_7605637, EPI_ISL_7605638, EPI_ISL_7605666, EPI_ISL_7605720, EPI_ISL_7605759, EPI_ISL_7605762, EPI_ISL_7605765, EPI_ISL_7605767, EPI_ISL_7605768, EPI_ISL_7605770, EPI_ISL_7605771                                                                                                                                                                                                                                                                                                                                                                                                                                                                                                                                                                                                                                                                                                                                                                                                                                                                                                                                                                                                                                                                                                                                                                                                                                                                                                                                                                                                                                                                                                                                                                                                                                                                                                                                                                                                                                                                                                                                                                                                                                                                                                                                                                                                                                                                                                                                                                                                                                                                                                                                                                                                                                                                                                                                                                                                                                                                                                                                                                                                                                                                                                                                                                                                                                                                          | see above                                                                           | National Institute for Communicable<br>Diseases of the National Health<br>Laboratory Service                                                          | Amoako DG; Bhiman JN; Everatt J; Ismail A; Mahlangu B; Mnguni A; Mohale T; Ntuli N; Scheepers C; Wolter N                                                                                                                                                                                                                                                                                                                                                                |
| EPI_ISL_7418017,<br>EPI_ISL_7571617,<br>EPI_ISL_7571618<br>EPI_ISL_7021517,<br>EPI_ISL_70174135                                                                                                                                                                                                                                                                                                                                                                                                                                                                                                                                                                                                                                                                                                                                                                                                                                                                                                                                                                                                                                                                                                                                                                                                                                                                                                                                                                                                                                                                                                                                                                                                                                                                                                                                                                                                                                                                                                                                                                                                                                                                                                                                                                                                                                                                                                                                                                                                                                                                                                                                                                                                                                                                                                                                                                                                                                                                                                                                                                                                                                                                                                                                                                                                                                                                                                                                                                                                                                                                                                            | National Institute of Infectious<br>Diseases<br>National Platform bis COVID ULB-IBC | National Institute of Infectious Diseases<br>National Platform bis COVID ULB-IBC                                                                      | Harutaka Katano; Ken Maeda; Kentaro Itokawa; Makoto Kuroda; Shuetsu Fukushima; Shun Iida; Tadaki Suzuki; Tsuyoshi Sekizuka; Yudi Kuroda<br>Arnaud Marchant; Benoit Haefliger; Coralie Henin; Marie-Luce Defforge; Ricardo De Mendonca                                                                                                                                                                                                                                    |
| EPI_ISL_7063764, EPI_ISL_7288348, EPI_ISL_7288357, EPI_ISL_7288375, EPI_ISL_7544936, EPI_ISL_7544937, EPI_ISL_7544938, EPI_ISL_7544939, EPI_ISL_7544940, EPI_ISL_7544941, EPI_ISL_7544942, EPI_ISL_7544947, EPI_ISL_7544948, EPI_ISL_7544949, EPI_ISL_7544950, EPI_ISL_7544953, EPI_ISL_7544954, EPI_ISL_7544956, EPI_ISL_7544960, EPI_ISL_7544963, EPI_ISL_7544964, EPI_ISL_7544965, EPI_ISL_7544969, EPI_ISL_7544971, EPI_ISL_7544972, EPI_ISL_7544974, EPI_ISL_7544975, EPI_ISL_7544980                                                                                                                                                                                                                                                                                                                                                                                                                                                                                                                                                                                                                                                                                                                                                                                                                                                                                                                                                                                                                                                                                                                                                                                                                                                                                                                                                                                                                                                                                                                                                                                                                                                                                                                                                                                                                                                                                                                                                                                                                                                                                                                                                                                                                                                                                                                                                                                                                                                                                                                                                                                                                                                                                                                                                                                                                                                                                                                                                                                                                                                                                                                 | see above                                                                           | National Platform bis<br>UMONS/Jolimont                                                                                                               | Eric Tarantino; Florian Juszcak; Gautier Detry; Guillaume Bayon-Vicente; Laetitia Gheysen; Ruddy Wattiez                                                                                                                                                                                                                                                                                                                                                                 |
| EPI_ISL_7137310, EPI_ISL_7137311, EPI_ISL_7195620, EPI_ISL_7195621, EPI_ISL_7195622, EPI_ISL_7195623, EPI_ISL_7460338, EPI_ISL_7604552, EPI_ISL_7604594, EPI_ISL_7604595, EPI_ISL_7604613, EPI_ISL_7604615, EPI_ISL_7604627                                                                                                                                                                                                                                                                                                                                                                                                                                                                                                                                                                                                                                                                                                                                                                                                                                                                                                                                                                                                                                                                                                                                                                                                                                                                                                                                                                                                                                                                                                                                                                                                                                                                                                                                                                                                                                                                                                                                                                                                                                                                                                                                                                                                                                                                                                                                                                                                                                                                                                                                                                                                                                                                                                                                                                                                                                                                                                                                                                                                                                                                                                                                                                                                                                                                                                                                                                                | see above                                                                           | National Public Health Laboratory,<br>National Centre for Infectious<br>Diseases                                                                      | Benny Yeo Ken Yee; Constance Chen; Dennis Loy Song Qi; Dimitar Kenarov; Grace Ngan Jie Yin; Katherine Ching; Katherine Ching Zi Yan; Kwan Ki Ko; Lin Cui; Mak Tze Minn; Niranjan Nagarajan; Raymond Tzer Pin Lin; Royce Ang; Samuel Loo; Sebastian Maurer Stroth; Suphavit Chayaporn; Zhenyang Zhou                                                                                                                                                                      |
| EPI_ISL_7154394,<br>EPI_ISL_7154403,<br>EPI_ISL_7273097,<br>EPI_ISL_7547734,                                                                                                                                                                                                                                                                                                                                                                                                                                                                                                                                                                                                                                                                                                                                                                                                                                                                                                                                                                                                                                                                                                                                                                                                                                                                                                                                                                                                                                                                                                                                                                                                                                                                                                                                                                                                                                                                                                                                                                                                                                                                                                                                                                                                                                                                                                                                                                                                                                                                                                                                                                                                                                                                                                                                                                                                                                                                                                                                                                                                                                                                                                                                                                                                                                                                                                                                                                                                                                                                                                                               | National Reference Laboratory,<br>NCDC                                              | National Reference Laboratory, Nigeria<br>Centre for Disease Control                                                                                  | Catherine Okoi; Chimaobi Chukwu; Dr Ifeanyi Adetifa; Dr Ndodo Nnaemeka; Dr Omoro Adesuyi; Nwando Mba; Oluajumoke Babatunde; Oluola Anuoluwapo Akanbi; Oyeronke Ayansola                                                                                                                                                                                                                                                                                                  |

|                                                                                                                                                                                                                                                                                                                                                                                                                                                                                                                                                                                                                                                                                                                                                                                                                                                                                                                                                                                                                                                                                                                                                                                                                                                                                                                                                                                                                                                                                                                                                                                                                                                                                                                                                                                                                                                                                                                                                               |                                                                                                                       |                                                                                                                                             |                                                                                                                                                                                                                                                                                                                                                                                                                                                                                               |
|---------------------------------------------------------------------------------------------------------------------------------------------------------------------------------------------------------------------------------------------------------------------------------------------------------------------------------------------------------------------------------------------------------------------------------------------------------------------------------------------------------------------------------------------------------------------------------------------------------------------------------------------------------------------------------------------------------------------------------------------------------------------------------------------------------------------------------------------------------------------------------------------------------------------------------------------------------------------------------------------------------------------------------------------------------------------------------------------------------------------------------------------------------------------------------------------------------------------------------------------------------------------------------------------------------------------------------------------------------------------------------------------------------------------------------------------------------------------------------------------------------------------------------------------------------------------------------------------------------------------------------------------------------------------------------------------------------------------------------------------------------------------------------------------------------------------------------------------------------------------------------------------------------------------------------------------------------------|-----------------------------------------------------------------------------------------------------------------------|---------------------------------------------------------------------------------------------------------------------------------------------|-----------------------------------------------------------------------------------------------------------------------------------------------------------------------------------------------------------------------------------------------------------------------------------------------------------------------------------------------------------------------------------------------------------------------------------------------------------------------------------------------|
| EPI_ISL_7547735<br>EPI_ISL_6939819,<br>EPI_ISL_7354124,<br>EPI_ISL_7406048,<br>EPI_ISL_7406049,<br>EPI_ISL_7406082,<br>EPI_ISL_7406083                                                                                                                                                                                                                                                                                                                                                                                                                                                                                                                                                                                                                                                                                                                                                                                                                                                                                                                                                                                                                                                                                                                                                                                                                                                                                                                                                                                                                                                                                                                                                                                                                                                                                                                                                                                                                        | National Virus Reference Laboratory                                                                                   | National Virus Reference Laboratory                                                                                                         | Charlene Bennett; Cillian F De Gascun; Gabriel Gonzalez; Jonathan Dean; Michael Carr; Zoe Yandle                                                                                                                                                                                                                                                                                                                                                                                              |
| EPI_ISL_7616432, EPI_ISL_7616434, EPI_ISL_7616435, EPI_ISL_7616437, EPI_ISL_7616439, EPI_ISL_7616441, EPI_ISL_7616442<br>see above                                                                                                                                                                                                                                                                                                                                                                                                                                                                                                                                                                                                                                                                                                                                                                                                                                                                                                                                                                                                                                                                                                                                                                                                                                                                                                                                                                                                                                                                                                                                                                                                                                                                                                                                                                                                                            | Naval Health Clinic Annapolis                                                                                         | Naval Medical Research Center<br>Biological Defense Research Directorate                                                                    | Catherine E. Arnold; Francisco Malagon; Kimberly A. Bishop-Lilly; Kyle A. Long; Logan J. Voegtly; Megan A. Schilling; Regina Z. Cer                                                                                                                                                                                                                                                                                                                                                           |
| EPI_ISL_7605624,<br>EPI_ISL_7605625,<br>EPI_ISL_7605626,<br>EPI_ISL_7605627,<br>EPI_ISL_7605628                                                                                                                                                                                                                                                                                                                                                                                                                                                                                                                                                                                                                                                                                                                                                                                                                                                                                                                                                                                                                                                                                                                                                                                                                                                                                                                                                                                                                                                                                                                                                                                                                                                                                                                                                                                                                                                               | Ndlovu Reaserch Centre                                                                                                | National Institute for Communicable Diseases of the National Health Laboratory Service                                                      | Amoako DG; Bhiman JN; Everatt J; Ismail A; Mahlangu B; Mnguni A; Mohale T; Ntuli N; Scheepers C; Wolter N                                                                                                                                                                                                                                                                                                                                                                                     |
| EPI_ISL_7116413,<br>EPI_ISL_7116439,<br>EPI_ISL_7116461,<br>EPI_ISL_7116681,<br>EPI_ISL_7116718,<br>EPI_ISL_7116738                                                                                                                                                                                                                                                                                                                                                                                                                                                                                                                                                                                                                                                                                                                                                                                                                                                                                                                                                                                                                                                                                                                                                                                                                                                                                                                                                                                                                                                                                                                                                                                                                                                                                                                                                                                                                                           | Nebraska Public Health Laboratory                                                                                     | NPHL COVID-19 Response Team                                                                                                                 | NPHL COVID-19 Response Team                                                                                                                                                                                                                                                                                                                                                                                                                                                                   |
| EPI_ISL_7544379,<br>EPI_ISL_7544739                                                                                                                                                                                                                                                                                                                                                                                                                                                                                                                                                                                                                                                                                                                                                                                                                                                                                                                                                                                                                                                                                                                                                                                                                                                                                                                                                                                                                                                                                                                                                                                                                                                                                                                                                                                                                                                                                                                           | New Somerset Hospital wc NSH                                                                                          | NHLS/UCT                                                                                                                                    | Arash Iranzadeh; Bruna Galvão; Carolyn Williamson; Deelan Doolabh; Diana Hardie; Gert Marais; Innocent Mudau; Luicer Olubayo; Lynn Tyers; Marvin Hsiao; Nokuzola Mbhele; Rageema Joseph; Stephen Korsman                                                                                                                                                                                                                                                                                      |
| EPI_ISL_6814922, EPI_ISL_6814923, EPI_ISL_6829575, EPI_ISL_6829577, EPI_ISL_6958955, EPI_ISL_7162071, EPI_ISL_7162072, EPI_ISL_7162073, EPI_ISL_7265843, EPI_ISL_7379517, EPI_ISL_7379527, EPI_ISL_7457536, EPI_ISL_7457537, EPI_ISL_7457538, EPI_ISL_7503742, EPI_ISL_7503743, EPI_ISL_7503744, EPI_ISL_7503745, EPI_ISL_7503746, EPI_ISL_7551964, EPI_ISL_7551971, EPI_ISL_7569451, EPI_ISL_7569452, EPI_ISL_7569453, EPI_ISL_7622408, EPI_ISL_7622409, EPI_ISL_7622410, EPI_ISL_7622411, EPI_ISL_7622412                                                                                                                                                                                                                                                                                                                                                                                                                                                                                                                                                                                                                                                                                                                                                                                                                                                                                                                                                                                                                                                                                                                                                                                                                                                                                                                                                                                                                                                   | New South Wales Health Pathology<br>Royal Prince Alfred Hospital                                                      | Microbiology RPAH                                                                                                                           | Au, J.; Bull, R.; Deveson, I.; Foster, C.; Rawlinson, W.; Ruiz Silva, M.; Van Hal, S.                                                                                                                                                                                                                                                                                                                                                                                                         |
| EPI_ISL_7418387,<br>EPI_ISL_7431953                                                                                                                                                                                                                                                                                                                                                                                                                                                                                                                                                                                                                                                                                                                                                                                                                                                                                                                                                                                                                                                                                                                                                                                                                                                                                                                                                                                                                                                                                                                                                                                                                                                                                                                                                                                                                                                                                                                           | Niedersächsisches Landesgesundheitsamt (NLGA)                                                                         | Robert Koch Institute                                                                                                                       |                                                                                                                                                                                                                                                                                                                                                                                                                                                                                               |
| EPI_ISL_6958280,<br>EPI_ISL_7571541,<br>EPI_ISL_7571542                                                                                                                                                                                                                                                                                                                                                                                                                                                                                                                                                                                                                                                                                                                                                                                                                                                                                                                                                                                                                                                                                                                                                                                                                                                                                                                                                                                                                                                                                                                                                                                                                                                                                                                                                                                                                                                                                                       | North Lantau Hospital                                                                                                 | Hong Kong Department of Health                                                                                                              | Alan K.L. Tsang; Edman T.K. Lam; Ken H.L. Ng; Patricia K. L. Leung; Peter C.W. Yip; Rickjason C.W. Chan                                                                                                                                                                                                                                                                                                                                                                                       |
| EPI_ISL_7601238,<br>EPI_ISL_7601282,<br>EPI_ISL_7601310,<br>EPI_ISL_7614981                                                                                                                                                                                                                                                                                                                                                                                                                                                                                                                                                                                                                                                                                                                                                                                                                                                                                                                                                                                                                                                                                                                                                                                                                                                                                                                                                                                                                                                                                                                                                                                                                                                                                                                                                                                                                                                                                   | OKMI                                                                                                                  | University Hospital Brno, CMBG                                                                                                              | Bezdicke Matej; Dolejska Monika; Kristyna Dufkova; Lengerova Martina; Svaton Jan                                                                                                                                                                                                                                                                                                                                                                                                              |
| EPI_ISL_7334887,<br>EPI_ISL_7334888                                                                                                                                                                                                                                                                                                                                                                                                                                                                                                                                                                                                                                                                                                                                                                                                                                                                                                                                                                                                                                                                                                                                                                                                                                                                                                                                                                                                                                                                                                                                                                                                                                                                                                                                                                                                                                                                                                                           | ONEIDA COUNTY HEALTH DEPT.                                                                                            | Wadsworth Center, New York State Department of Health                                                                                       | Alexis Russell; Catharine Prussing; Daryl M. Lamson; Erasmus Schneider; Erica Lasek-Nesselequist; John Kelly; Jonathan Plitnick; Kirsten St. George; Matthew Shudt; Melissa A Leisner; Navjot Singh                                                                                                                                                                                                                                                                                           |
| EPI_ISL_7552440,<br>EPI_ISL_7552445,<br>EPI_ISL_7552446                                                                                                                                                                                                                                                                                                                                                                                                                                                                                                                                                                                                                                                                                                                                                                                                                                                                                                                                                                                                                                                                                                                                                                                                                                                                                                                                                                                                                                                                                                                                                                                                                                                                                                                                                                                                                                                                                                       | Ochsner Health                                                                                                        | BioInfoExperts                                                                                                                              | Amy Feehan; Ben Lain; Chris Huston; David J. Nolan; Judy Crabtree; Julia-Garcia-Diaz; Lucio Miele; Rebecca Rose; Samuel Moot; Susanna L. Lamers; Tessa LaFleur                                                                                                                                                                                                                                                                                                                                |
| EPI_ISL_7495763<br>EPI_ISL_7040235                                                                                                                                                                                                                                                                                                                                                                                                                                                                                                                                                                                                                                                                                                                                                                                                                                                                                                                                                                                                                                                                                                                                                                                                                                                                                                                                                                                                                                                                                                                                                                                                                                                                                                                                                                                                                                                                                                                            | Omega Diagnostics at Mounes<br>Oslo University Hospital,<br>Department of Medical Microbiology                        | Omega Diagnostics at Mounes<br>Norwegian Institute of Public Health,<br>Department of Virology                                              | Cherish Jackson; Cynthia Corley; Latira Haynes-Jacob; MD; Vivek Khare<br>Atiya R Ali; Debech Nadia; Engebretsen Serina Beate; Garcia Llorente Ignacio; Hilde Elshaug; Hilde Vollan; Jon Bråte; Kamilla Heddeland Instefjord; Karoline Bragstad; Kathrine Stene-Johansen; Line Victoria Moen; Marie Paulsen Madsen; Olav Hugnnes; Pedersen Benedikte Nevjen; Rasmus Riis Kopperud                                                                                                              |
| EPI_ISL_7248730,<br>EPI_ISL_7248745,<br>EPI_ISL_7248753,<br>EPI_ISL_7248763,<br>EPI_ISL_7470724,<br>EPI_ISL_7470728                                                                                                                                                                                                                                                                                                                                                                                                                                                                                                                                                                                                                                                                                                                                                                                                                                                                                                                                                                                                                                                                                                                                                                                                                                                                                                                                                                                                                                                                                                                                                                                                                                                                                                                                                                                                                                           | Oslo University Hospital,<br>Department of Microbiology                                                               | Norwegian Institute of Public Health,<br>Department of Virology                                                                             | Arvind Yegambaram Meenakshi Sundaram; Atiya R Ali; Cathrine Fladeby; Debech Nadia; Engebretsen Serina Beate; Garcia Llorente Ignacio; Gregor D. Gillfillan; Hilde Elshaug; Hilde Vollan; Jon Bråte; Kamilla Heddeland Instefjord; Karoline Bragstad; Kathrine Stene-Johansen; Line Victoria Moen; Lise Andresen; Mariann Nilsen; Marie Paulsen Madsen; Mona Holberg-Petersen; Olav Hugnnes; Pedersen Benedikte Nevjen; Pål Marius Bjørnstad; Rasmus Riis Kopperud; Teodora Plamenova Ribarska |
| EPI_ISL_7470189                                                                                                                                                                                                                                                                                                                                                                                                                                                                                                                                                                                                                                                                                                                                                                                                                                                                                                                                                                                                                                                                                                                                                                                                                                                                                                                                                                                                                                                                                                                                                                                                                                                                                                                                                                                                                                                                                                                                               | Oxford Hospital Trust – Kohns, Centre for Laboratory Medicine, Section for gene technology and infection serology     | Norwegian Institute of Public Health,<br>Department of Virology                                                                             | Atiya R Ali; Debech Nadia; Engebretsen Serina Beate; Garcia Llorente Ignacio; Hilde Elshaug; Hilde Vollan; Jon Bråte; Kamilla Heddeland Instefjord; Karoline Bragstad; Kathrine Stene-Johansen; Line Victoria Moen; Marie Paulsen Madsen; Olav Hugnnes; Pedersen Benedikte Nevjen; Rasmus Riis Kopperud                                                                                                                                                                                       |
| EPI_ISL_7190366,<br>EPI_ISL_7467356                                                                                                                                                                                                                                                                                                                                                                                                                                                                                                                                                                                                                                                                                                                                                                                                                                                                                                                                                                                                                                                                                                                                                                                                                                                                                                                                                                                                                                                                                                                                                                                                                                                                                                                                                                                                                                                                                                                           | PHV-FSS                                                                                                               | PHV-FSS                                                                                                                                     | Chenwei Wang on behalf of Q-PHIRE Genomics                                                                                                                                                                                                                                                                                                                                                                                                                                                    |
| EPI_ISL_7605742,<br>EPI_ISL_7605764                                                                                                                                                                                                                                                                                                                                                                                                                                                                                                                                                                                                                                                                                                                                                                                                                                                                                                                                                                                                                                                                                                                                                                                                                                                                                                                                                                                                                                                                                                                                                                                                                                                                                                                                                                                                                                                                                                                           | PORT ELIZABETH LABORATORY                                                                                             | National Institute for Communicable Diseases of the National Health Laboratory Service                                                      | Amoako DG; Bhiman JN; Everatt J; Ismail A; Mahlangu B; Mnguni A; Mohale T; Ntuli N; Scheepers C; Wolter N                                                                                                                                                                                                                                                                                                                                                                                     |
| EPI_ISL_7605607                                                                                                                                                                                                                                                                                                                                                                                                                                                                                                                                                                                                                                                                                                                                                                                                                                                                                                                                                                                                                                                                                                                                                                                                                                                                                                                                                                                                                                                                                                                                                                                                                                                                                                                                                                                                                                                                                                                                               | POTCHEFSTROOM LABORATORY                                                                                              | National Institute for Communicable Diseases of the National Health Laboratory Service                                                      | Amoako DG; Bhiman JN; Everatt J; Ismail A; Mahlangu B; Mnguni A; Mohale T; Ntuli N; Scheepers C; Wolter N                                                                                                                                                                                                                                                                                                                                                                                     |
| EPI_ISL_6774082,<br>EPI_ISL_6774086,<br>EPI_ISL_6774092                                                                                                                                                                                                                                                                                                                                                                                                                                                                                                                                                                                                                                                                                                                                                                                                                                                                                                                                                                                                                                                                                                                                                                                                                                                                                                                                                                                                                                                                                                                                                                                                                                                                                                                                                                                                                                                                                                       | Palapye Primary Hospital Laboratory                                                                                   | Botswana Harvard HIV Reference Laboratory                                                                                                   | Boitumelo Zuze; Botshelo Radibe; Dorcas Maruapula; Joseph Makhema; Keoratlhe Ntshambiwa; Kgomotso Moruisi; Legodile Kooepile; Mosepele Mosepele; Mphaphi B. Mbulawa; Ontlametse T. Bareng; Pamela Smith-Lawrence; Roger Shapiro; Sefetogi Ramadoga; Shahin Lockman; Sikhulle Moyo; Simani Gaseitsiwe; Thongbotho Mphoyakgosi; Wonderful T. Choga                                                                                                                                              |
| EPI_ISL_7129868, EPI_ISL_7129869, EPI_ISL_7602801, EPI_ISL_7604813, EPI_ISL_7604824, EPI_ISL_7614032, EPI_ISL_7614035, EPI_ISL_7614040<br>see above                                                                                                                                                                                                                                                                                                                                                                                                                                                                                                                                                                                                                                                                                                                                                                                                                                                                                                                                                                                                                                                                                                                                                                                                                                                                                                                                                                                                                                                                                                                                                                                                                                                                                                                                                                                                           | Pandemic Response Lab - NYC                                                                                           | Pandemic Response Lab, R&D                                                                                                                  | Alex Carpio; Cybill del Castillo; Dylan Law; Haiping Hao; Henry Lee; Isabel Fernandez Escapa; Jon Laurent; Melissa Hopkins; Michael Hammerling; Pradeep Bugga; Shinyoung Clair Kang; Sol Rey; William Ward                                                                                                                                                                                                                                                                                    |
| EPI_ISL_6842152, EPI_ISL_6842154, EPI_ISL_6842155, EPI_ISL_6842157, EPI_ISL_6842158, EPI_ISL_6842160, EPI_ISL_6842161, EPI_ISL_6842164, EPI_ISL_6842166, EPI_ISL_6842167, EPI_ISL_7452739, EPI_ISL_7452740, EPI_ISL_7452743, EPI_ISL_7452747, EPI_ISL_7452752, EPI_ISL_7452753, EPI_ISL_7452754, EPI_ISL_7452755, EPI_ISL_7452756, EPI_ISL_7452757, EPI_ISL_7452760, EPI_ISL_7452779, EPI_ISL_7452784, EPI_ISL_7452786, EPI_ISL_7452787, EPI_ISL_7452788, EPI_ISL_7452789, EPI_ISL_7452790, EPI_ISL_7452791, EPI_ISL_7452801, EPI_ISL_7452802, EPI_ISL_7452803, EPI_ISL_7452804, EPI_ISL_7456466, EPI_ISL_7456467, EPI_ISL_7456468, EPI_ISL_7456469, EPI_ISL_7456470, EPI_ISL_7456471, EPI_ISL_7456472, EPI_ISL_7456473, EPI_ISL_7456474, EPI_ISL_7456475, EPI_ISL_7456476, EPI_ISL_7456477, EPI_ISL_7456478, EPI_ISL_7456479, EPI_ISL_7456480, EPI_ISL_7456481, EPI_ISL_7456482, EPI_ISL_7456483, EPI_ISL_7456484, EPI_ISL_7456485, EPI_ISL_7456489, EPI_ISL_7456490, EPI_ISL_7456491, EPI_ISL_7456492, EPI_ISL_7456493, EPI_ISL_7456494, EPI_ISL_7456495, EPI_ISL_7456496, EPI_ISL_7456497, EPI_ISL_7456498, EPI_ISL_7456499, EPI_ISL_7456500, EPI_ISL_7456501, EPI_ISL_7456502, EPI_ISL_7456503, EPI_ISL_7456504, EPI_ISL_7456506, EPI_ISL_7456507, EPI_ISL_7456508, EPI_ISL_7456509, EPI_ISL_7456510, EPI_ISL_7456511, EPI_ISL_7456512, EPI_ISL_7456513, EPI_ISL_7456514, EPI_ISL_7456515, EPI_ISL_7456516, EPI_ISL_7456517, EPI_ISL_7456518, EPI_ISL_7456519, EPI_ISL_7456520, EPI_ISL_7456521, EPI_ISL_7456522, EPI_ISL_7456523, EPI_ISL_7456524, EPI_ISL_7544906, EPI_ISL_7544907, EPI_ISL_7544908, EPI_ISL_7544909, EPI_ISL_7544910, EPI_ISL_7544911, EPI_ISL_7544912, EPI_ISL_7544913, EPI_ISL_7544914, EPI_ISL_7544915, EPI_ISL_7544916, EPI_ISL_7544917, EPI_ISL_7544918, EPI_ISL_7544919, EPI_ISL_7544920, EPI_ISL_7544921, EPI_ISL_7544922, EPI_ISL_7544923, EPI_ISL_7544924, EPI_ISL_7544925, EPI_ISL_7544926, EPI_ISL_7544927, EPI_ISL_7544928 | Division of Medical Virology, National Health Laboratory Service (NHLS), Tygerberg Hospital / Stellenbosch University | Gert van Zyl; Jean Maritz; Kamela Mahlakwane; Nadine Cronje; Petra Raimond; Shannon Wilson; Tania Stander; Tongai Maponga; Wolfgang Preiser |                                                                                                                                                                                                                                                                                                                                                                                                                                                                                               |
| EPI_ISL_7263932,<br>EPI_ISL_7263933                                                                                                                                                                                                                                                                                                                                                                                                                                                                                                                                                                                                                                                                                                                                                                                                                                                                                                                                                                                                                                                                                                                                                                                                                                                                                                                                                                                                                                                                                                                                                                                                                                                                                                                                                                                                                                                                                                                           | Pathogenic Microorganisms Variability Laboratory                                                                      | Pathogenic Microorganisms Variability Laboratory                                                                                            | Alexander Gintsburg; Alexander Voskoboinikov; Andrei Sinilavin; Andrey Pochtovty; Artem Tkachuk; Denis Logunov; Elena Shidlovskaya; Elizaveta Divisenko; Inna Dolzhikova; Lyudmila Vasilchenko; Nadezhda Kuznetsova; Odintsova Alina; Vladimir Gushchin                                                                                                                                                                                                                                       |
| EPI_ISL_7621339                                                                                                                                                                                                                                                                                                                                                                                                                                                                                                                                                                                                                                                                                                                                                                                                                                                                                                                                                                                                                                                                                                                                                                                                                                                                                                                                                                                                                                                                                                                                                                                                                                                                                                                                                                                                                                                                                                                                               | Pathology North - Gosford Hospital - NSW Health Pathology                                                             | NSW Health Pathology - Institute of Clinical Pathology and Medical Research; Westmead Hospital; University of Sydney                        | Arnott A.; Draper J.; Gall M.; Martinez E.; Rockett R.; Sintchenko V.; on behalf of ICPMR                                                                                                                                                                                                                                                                                                                                                                                                     |
| EPI_ISL_7265083,<br>EPI_ISL_7265084                                                                                                                                                                                                                                                                                                                                                                                                                                                                                                                                                                                                                                                                                                                                                                                                                                                                                                                                                                                                                                                                                                                                                                                                                                                                                                                                                                                                                                                                                                                                                                                                                                                                                                                                                                                                                                                                                                                           | Pathology North - Royal North Shore Hospital - NSW Health Pathology                                                   | NSW Health Pathology - Institute of Clinical Pathology and Medical Research; Westmead Hospital; University of Sydney                        | Arnott A.; Draper J.; Gall M.; Martinez E.; Rockett R.; Sintchenko V.; on behalf of ICPMR                                                                                                                                                                                                                                                                                                                                                                                                     |
| EPI_ISL_6864915, EPI_ISL_6956011, EPI_ISL_6956014, EPI_ISL_7620963, EPI_ISL_7621211, EPI_ISL_7621359, EPI_ISL_7621961<br>see above                                                                                                                                                                                                                                                                                                                                                                                                                                                                                                                                                                                                                                                                                                                                                                                                                                                                                                                                                                                                                                                                                                                                                                                                                                                                                                                                                                                                                                                                                                                                                                                                                                                                                                                                                                                                                            | Pathology West - NSW Health Pathology                                                                                 | NSW Health Pathology - Institute of Clinical Pathology and Medical Research; Westmead Hospital; University of Sydney                        | Arnott A.; Draper J.; Gall M.; Martinez E.; Rockett R.; Sintchenko V.; on behalf of ICPMR                                                                                                                                                                                                                                                                                                                                                                                                     |
| EPI_ISL_7565646                                                                                                                                                                                                                                                                                                                                                                                                                                                                                                                                                                                                                                                                                                                                                                                                                                                                                                                                                                                                                                                                                                                                                                                                                                                                                                                                                                                                                                                                                                                                                                                                                                                                                                                                                                                                                                                                                                                                               | Pathology and Laboratory Medicine Institute, Cleveland Clinic, Ohio, USA                                              | Pathology and Laboratory Medicine Institute, Cleveland Clinic, Ohio, USA                                                                    | Concetta Peck; Daniel H. Farkas; Daniel Rhoads; David Bosler; David Plunkett; Jay Brock; Jennifer Starbuck; Jessica Spildener; Joy Nakitandwe; Kristen McDonnell; Nicole Hamon; Thomas Rose; Yu-Wei Cheng; Zheng Jin Tu                                                                                                                                                                                                                                                                       |
| EPI_ISL_7406251,                                                                                                                                                                                                                                                                                                                                                                                                                                                                                                                                                                                                                                                                                                                                                                                                                                                                                                                                                                                                                                                                                                                                                                                                                                                                                                                                                                                                                                                                                                                                                                                                                                                                                                                                                                                                                                                                                                                                              | Plateforme de testing Namuroise                                                                                       | Plateforme de testing Namuroise                                                                                                             | Degossier Jonathan; Demars Aurore; Denis Olivier; Gilliard Nicolas; Maschietto Céline; Mullier François; Nobis Chloé; Otto Gaetan                                                                                                                                                                                                                                                                                                                                                             |

|                                                                                                                                                                                                                                                                                                                                                                                                                                                                                                                                                                                                                                                                                                                                                           |                                                                                                          |                                                                                                                                |                                                                                                                                                                                                                                                                                                                                                                                                                                                                                                 |
|-----------------------------------------------------------------------------------------------------------------------------------------------------------------------------------------------------------------------------------------------------------------------------------------------------------------------------------------------------------------------------------------------------------------------------------------------------------------------------------------------------------------------------------------------------------------------------------------------------------------------------------------------------------------------------------------------------------------------------------------------------------|----------------------------------------------------------------------------------------------------------|--------------------------------------------------------------------------------------------------------------------------------|-------------------------------------------------------------------------------------------------------------------------------------------------------------------------------------------------------------------------------------------------------------------------------------------------------------------------------------------------------------------------------------------------------------------------------------------------------------------------------------------------|
| EPI_ISL_7472848,<br>EPI_ISL_7472859,<br>EPI_ISL_7472865<br>EPI_ISL_7173899,<br>EPI_ISL_7566194,<br>EPI_ISL_7606105,<br>EPI_ISL_7606106,<br>EPI_ISL_7606107,<br>EPI_ISL_7606108<br>EPI_ISL_6777160                                                                                                                                                                                                                                                                                                                                                                                                                                                                                                                                                         | Platform BfS UZA/UAntwerpen                                                                              | Labo Klinische Biologie, UZA                                                                                                   | Basil Britto Xavier; Christine Lammens; Herman Goossens; Ines Verbesselt; Jasmine Coppens; Kathleen Hollemans; Marie Le Mercier; Veerle Matheusens                                                                                                                                                                                                                                                                                                                                              |
| EPI_ISL_7416687,<br>EPI_ISL_7416708<br>EPI_ISL_7507116,<br>EPI_ISL_7507117,<br>EPI_ISL_7507119                                                                                                                                                                                                                                                                                                                                                                                                                                                                                                                                                                                                                                                            | Políclinico San Donato                                                                                   | Laboratory of Clinical Microbiology, Virology and Bioemergencies, ASST Fatebenefratelli Sacco - Sacco Hospital                 | Valeria Micheli                                                                                                                                                                                                                                                                                                                                                                                                                                                                                 |
| EPI_ISL_7416687,<br>EPI_ISL_7416708<br>EPI_ISL_7507116,<br>EPI_ISL_7507117,<br>EPI_ISL_7507119                                                                                                                                                                                                                                                                                                                                                                                                                                                                                                                                                                                                                                                            | Procomcure Biotech Germany GmbH                                                                          | Robert Koch Institute                                                                                                          |                                                                                                                                                                                                                                                                                                                                                                                                                                                                                                 |
| EPI_ISL_7135501, EPI_ISL_7135502, EPI_ISL_7135503, EPI_ISL_7135504, EPI_ISL_7263924, EPI_ISL_7263925, EPI_ISL_7263926, EPI_ISL_7263927, EPI_ISL_7263928, EPI_ISL_7263929, EPI_ISL_7263930, EPI_ISL_7334884, EPI_ISL_7334885, EPI_ISL_7334886, EPI_ISL_7438844, EPI_ISL_7438882, EPI_ISL_7438901, EPI_ISL_7438918, EPI_ISL_7438932, EPI_ISL_7438964, EPI_ISL_7438994, EPI_ISL_7459993, EPI_ISL_7459994, EPI_ISL_7459995, EPI_ISL_7459996, EPI_ISL_7459997, EPI_ISL_7459998, EPI_ISL_7495449, EPI_ISL_7495450, EPI_ISL_7495451, EPI_ISL_7495452, EPI_ISL_7495453, EPI_ISL_7495454, EPI_ISL_7495455, EPI_ISL_7620050, EPI_ISL_7620051, EPI_ISL_7620052, EPI_ISL_7620053, EPI_ISL_7620054, EPI_ISL_7620055, EPI_ISL_7620056                                   | Public Health Authority of the Slovak Republic                                                           | Public Health Authority of the Slovak Republic                                                                                 | Anna Glíčov; Barbora Kotvasová; Elena Tichá; Lucia Ševčíková; Miroslav Böhmer; Pavol Mišenko; Terézia Vrabľová; Tomáš Szemes                                                                                                                                                                                                                                                                                                                                                                    |
| see above                                                                                                                                                                                                                                                                                                                                                                                                                                                                                                                                                                                                                                                                                                                                                 | Public Health Service Amsterdam, The Netherlands                                                         | Department of Medical Microbiology & Infection prevention, Amsterdam University Medical Centers location AMC                   | Akke Cornelissen; Fokla Zorgdrager; Janke Schinkel; Jelle Koopsen; Judith den Uil; Marcel Jonges; Matthijs Wellers; Menno de Jong; Robin van Houdt; Sebastian Matamoros; Sjoerd Rebers; Sylvia Bruisten; Tjalling Leenstra and Mariken van der Lubben on behalf of the Amsterdam Regional Genomic epidemiology and Outbreak Surveillance (ARGOS) consortium                                                                                                                                     |
| EPI_ISL_7135499, EPI_ISL_7259544, EPI_ISL_7259701, EPI_ISL_7259710, EPI_ISL_7259716, EPI_ISL_7259721, EPI_ISL_7259732, EPI_ISL_7259741, EPI_ISL_7259744, EPI_ISL_7334879, EPI_ISL_7334880, EPI_ISL_7464493, EPI_ISL_7464494, EPI_ISL_7613101, EPI_ISL_7613160, EPI_ISL_7613179, EPI_ISL_7613185, EPI_ISL_7613224, EPI_ISL_7613230, EPI_ISL_7613235, EPI_ISL_7613242                                                                                                                                                                                                                                                                                                                                                                                       | Public Health Ontario Laboratory                                                                         | Public Health Ontario Laboratory                                                                                               | Almin Li; Alireza Eshaghi; Andre Villegas; Ashleigh Sullivan; Christine Frantz; Dean Maxwell; Esha Joshi; Jared Simpson; Jennifer L Guthrie; Jonathan B Gubbay; Karthikeyan Sivaraman; Lawrence Helsler; Matthew Watson; Michael CY Li; Michael Laszloffy; Nahuel Fittipaldi; Philip Banh; Richard de Borja; Samir N Patel; Sandeep Nagra; Sandra Zittermann; Sarah Teatero; Vanessa G Allen; Yao Chen; Yogi Sundaravadanam                                                                     |
| EPI_ISL_7592963                                                                                                                                                                                                                                                                                                                                                                                                                                                                                                                                                                                                                                                                                                                                           | Puerto Rico Department of Health                                                                         | Centers for Disease Control and Prevention, Dengue Branch                                                                      | Betzabel Flores; Gabriela Paz-Bailey; Gilberto A. Santiago; Glenda Gonzalez; Jorge L. Munoz-Jordan; Keyla Charriez                                                                                                                                                                                                                                                                                                                                                                              |
| EPI_ISL_7605590, EPI_ISL_7605591, EPI_ISL_7605651, EPI_ISL_7605652, EPI_ISL_7605653, EPI_ISL_7605654, EPI_ISL_7605655, EPI_ISL_7605656, EPI_ISL_7605658, EPI_ISL_7605659, EPI_ISL_7605660, EPI_ISL_7605661, EPI_ISL_7605662, EPI_ISL_7605663, EPI_ISL_7605664, EPI_ISL_7605667, EPI_ISL_7605668, EPI_ISL_7605671, EPI_ISL_7605672, EPI_ISL_7605673, EPI_ISL_7605674, EPI_ISL_7605675,                                                                                                                                                                                                                                                                                                                                                                     | ROB FERREIRA LABORATORY                                                                                  | National Institute for Communicable Diseases of the National Health Laboratory Service                                         | Amoako DG; Bhiman JN; Everatt J; Ismail A; Mahlangu B; Mnguni A; Mohale T; Ntuli N; Scheepers C; Wolter N                                                                                                                                                                                                                                                                                                                                                                                       |
| EPI_ISL_7605676, EPI_ISL_7605740                                                                                                                                                                                                                                                                                                                                                                                                                                                                                                                                                                                                                                                                                                                          | RUSTENBURG LABORATORY                                                                                    | National Institute for Communicable Diseases of the National Health Laboratory Service                                         | Amoako DG; Bhiman JN; Everatt J; Ismail A; Mahlangu B; Mnguni A; Mohale T; Ntuli N; Scheepers C; Wolter N                                                                                                                                                                                                                                                                                                                                                                                       |
| EPI_ISL_6862005                                                                                                                                                                                                                                                                                                                                                                                                                                                                                                                                                                                                                                                                                                                                           | Regional Hospital Liberec                                                                                | Regional Hospital Liberec                                                                                                      | Iva Dolinova; Katerina Arientova; Katerina Stillerova; Martin Kracki; Tomas Zajic                                                                                                                                                                                                                                                                                                                                                                                                               |
| EPI_ISL_7166216, EPI_ISL_7345201, EPI_ISL_7345221, EPI_ISL_7345322, EPI_ISL_7398995, EPI_ISL_7399058, EPI_ISL_7399073, EPI_ISL_7399078, EPI_ISL_7399512, EPI_ISL_7400550, EPI_ISL_7400551, EPI_ISL_7400555, EPI_ISL_7463952, EPI_ISL_7463953, EPI_ISL_7463956, EPI_ISL_7463961, EPI_ISL_7463968, EPI_ISL_7463969, EPI_ISL_7463972, EPI_ISL_7463975, EPI_ISL_7463979, EPI_ISL_7463997, EPI_ISL_7464020, EPI_ISL_7464030, EPI_ISL_7464048, EPI_ISL_7464049, EPI_ISL_7464059, EPI_ISL_7509826, EPI_ISL_7509828, EPI_ISL_7509830, EPI_ISL_7563604, EPI_ISL_7563965, EPI_ISL_7563969, EPI_ISL_7583283, EPI_ISL_7583286, EPI_ISL_7583295, EPI_ISL_7583354, EPI_ISL_7583375, EPI_ISL_7583411, EPI_ISL_7637839, EPI_ISL_7637844, EPI_ISL_7637845                  | Respiratory Virus Unit, Microbiology Services Colindale, Public Health England                           | COVID-19 Genomics UK (COG-UK) Consortium                                                                                       | PHE Covid Sequencing Team                                                                                                                                                                                                                                                                                                                                                                                                                                                                       |
| EPI_ISL_7116918                                                                                                                                                                                                                                                                                                                                                                                                                                                                                                                                                                                                                                                                                                                                           | Robert Koch-Institut ZBS1 (Zentrum für biologische Gefahren und spezielle Pathogene hochpathogene Viren) | Robert Koch Institute                                                                                                          |                                                                                                                                                                                                                                                                                                                                                                                                                                                                                                 |
| EPI_ISL_7142714, EPI_ISL_7303373, EPI_ISL_7485193, EPI_ISL_7519924, EPI_ISL_7536363                                                                                                                                                                                                                                                                                                                                                                                                                                                                                                                                                                                                                                                                       | Rosalind Franklin Laboratory                                                                             | Wellcome Sanger Institute for the COVID-19 Genomics UK (COG-UK) Consortium                                                     | Cordella Langford; David K. Jackson; Dominic Kwiatkowski; Donald Fraser; Ewan Harrison; Ian Johnston; Jeffrey Barrett; John Sillitoe on behalf of the Wellcome Sanger Institute COVID-19 Surveillance Team; Rob Howes; Roberto Amato; Sonia Goncalves; Suki Lee; The Rosalind Franklin Laboratory and Alex Alderton                                                                                                                                                                             |
| EPI_ISL_7366154                                                                                                                                                                                                                                                                                                                                                                                                                                                                                                                                                                                                                                                                                                                                           | Rush University Medical Center                                                                           | RPHL at Rush University Medical Center                                                                                         | Alyse Kittner; Cecilia Chau; Diane Springer; Edith Perez; Felix Araujo Perez; Hannah Barbian; Joyce Houlihan; Kevin Kunstman; Laura Furtado; Marieta Hyde; Mary Hayden; Sofiya Bobrovskaya; Stefan Green                                                                                                                                                                                                                                                                                        |
| EPI_ISL_7545637, EPI_ISL_7545638, EPI_ISL_7545639, EPI_ISL_7545640, EPI_ISL_7545641, EPI_ISL_7545642, EPI_ISL_7545643, EPI_ISL_7545644, EPI_ISL_7545645, EPI_ISL_7545646, EPI_ISL_7545647, EPI_ISL_7545648, EPI_ISL_7545649, EPI_ISL_7545650                                                                                                                                                                                                                                                                                                                                                                                                                                                                                                              | see above                                                                                                | SAMRC                                                                                                                          | Arisha Maharaj; Giandhari J; MRC; Naidoo Y; Pillay S; Ramphal U; Ramphal Y; San JE; Tegally H; Tshiabula D; Wilkinson E; de Oliveira T                                                                                                                                                                                                                                                                                                                                                          |
| EPI_ISL_6913953, EPI_ISL_6914908, EPI_ISL_7194610                                                                                                                                                                                                                                                                                                                                                                                                                                                                                                                                                                                                                                                                                                         | SARS-CoV-2 testing team, National Institute of Infectious Diseases                                       | Pathogen Genomics Center, National Institute of Infectious Diseases                                                            | Hazuka Y Furihata; Kentaro Tokawa; Makoto Kuroda; Masanori Hashino; Masumichi Saito; Naomi Nojiri; Nozomu Hanaoka; Rina Tanaka; Tsuguto Fujimoto; Tsuyoshi Sekizuka                                                                                                                                                                                                                                                                                                                             |
| EPI_ISL_7458718, EPI_ISL_7458719, EPI_ISL_7458720, EPI_ISL_7458721                                                                                                                                                                                                                                                                                                                                                                                                                                                                                                                                                                                                                                                                                        | SK-Roy Romanow Provincial Laboratory                                                                     | Saskatchewan - Roy Romanow Provincial Laboratory (RRPL)                                                                        | Alanna Senecal; Amanda Lang; Jessica Minion; Kara Loos; Keith MacKenzie; Meredith Faires; Rachel DePaulo; Roy Romanow Provincial Laboratory - Molecular Diagnostics; Ryan McDonald                                                                                                                                                                                                                                                                                                              |
| EPI_ISL_7334889, EPI_ISL_7334890                                                                                                                                                                                                                                                                                                                                                                                                                                                                                                                                                                                                                                                                                                                          | SUNRISE MEDICAL LABORATORIES                                                                             | Wadsworth Center, New York State Department of Health                                                                          | Alexis Russell; Catharine Prussing; Daryl M. Lamson; Erasmus Schneider; Erica Lasek-Nesselequist; John Kelly; Jonathan Pitnick; Kirsten St. George; Matthew Shudt; Melissa A Leisner; Navjot Singh                                                                                                                                                                                                                                                                                              |
| EPI_ISL_7195727, EPI_ISL_7440440, EPI_ISL_7442466                                                                                                                                                                                                                                                                                                                                                                                                                                                                                                                                                                                                                                                                                                         | SYNLAB                                                                                                   | GIGA Medical Genomics                                                                                                          | Bouchra Boujemla; Claire Gourzonès; Cécile Meex; Keith Durkin; Laurent Gillet; Maria Artesi; Marie-Pierre Hayette; Nadine Cambisano; Nathalie Renotte; Olivier Ek; Sébastien Bontems; Vincent Bours                                                                                                                                                                                                                                                                                             |
| EPI_ISL_7565722, EPI_ISL_7565723                                                                                                                                                                                                                                                                                                                                                                                                                                                                                                                                                                                                                                                                                                                          | Salud Digna                                                                                              | Instituto Nacional de Medicina Genómica                                                                                        | Abraham Campos-Romero; Cedro-Tanda A; Cruz-Islas Jazmin; Escobar-Arrazola MA; Garnica-Lopez Dora; Herrera-Montalvo LA; Hidalgo-Miranda A; Luna-Ruiz Marco; Mendoza-Vargas A; Moreno-Camacho José Luis; Ramirez-Vega O; Rangel-DeLeon D; Reyes-Grajeda JP; Rodriguez-Gallegos Jorge; Yair Alfaro-Mora                                                                                                                                                                                            |
| EPI_ISL_7200823                                                                                                                                                                                                                                                                                                                                                                                                                                                                                                                                                                                                                                                                                                                                           | Salzkammergutklinikum Vöcklabruck, Institut für Pathologie                                               | Salzkammergutklinikum Vöcklabruck, Institut für Pathologie                                                                     | Franz Pühringer; Penka Lechner; Regina Stitz; René Silje; Senka Rohregger                                                                                                                                                                                                                                                                                                                                                                                                                       |
| EPI_ISL_7015235                                                                                                                                                                                                                                                                                                                                                                                                                                                                                                                                                                                                                                                                                                                                           | Selangor State Health Department                                                                         | Institute for Medical Research, Infectious Disease Research Centre, National Institutes of Health, Ministry of Health Malaysia | Ahmad FA; Ahmad Fazilah NA; Anasir MI; Azizan MA; Kamel K; Mohamad Sukri MZ; Mohd Zawawi Z; Norhisham SN; Ramly N; Robert F; Rosli NR; Suplah J; Thayan R                                                                                                                                                                                                                                                                                                                                       |
| EPI_ISL_7467969                                                                                                                                                                                                                                                                                                                                                                                                                                                                                                                                                                                                                                                                                                                                           | Servicio Virosis Respiratorias- Departamento Virología-INEI                                              | Instituto Nacional Enfermedades Infecciosas C.G.Malbran                                                                        | Avaro M.; Baumeister E.; Benedetti E.; Campos J.; Cisterna D.; Dattero ME; De Belder D.; Haim MS.; Lorenzo F.; Molina V.; Perandones C.; Polkepovich T.; Pontoriero A.; Russo M.; Sanchez Loria J.; Tuduri E.                                                                                                                                                                                                                                                                                   |
| EPI_ISL_7625809                                                                                                                                                                                                                                                                                                                                                                                                                                                                                                                                                                                                                                                                                                                                           | Servicio de Microbiología Hospital Ramon y Cajal                                                         | Servicio de Microbiología Hospital Ramon y Cajal                                                                               | Galan JC; Martinez L; Abreu M; Ponce M; y Gonzalez-Alba JM                                                                                                                                                                                                                                                                                                                                                                                                                                      |
| EPI_ISL_6795212, EPI_ISL_6825365, EPI_ISL_7056045, EPI_ISL_7056614, EPI_ISL_7593654, EPI_ISL_7593690, EPI_ISL_7593776, EPI_ISL_7593892, EPI_ISL_7594058, EPI_ISL_7594110, EPI_ISL_7594549, EPI_ISL_7594591, EPI_ISL_7594719, EPI_ISL_7594860, EPI_ISL_7595155, EPI_ISL_7595730, EPI_ISL_7595974, EPI_ISL_7596005, EPI_ISL_7596893, EPI_ISL_7596897, EPI_ISL_7596904, EPI_ISL_7596918, EPI_ISL_7596923, EPI_ISL_7596932, EPI_ISL_7596941, EPI_ISL_7596950, EPI_ISL_7596956, EPI_ISL_7596957, EPI_ISL_7596969, EPI_ISL_7596978, EPI_ISL_7596990, EPI_ISL_7596997, EPI_ISL_7603138, EPI_ISL_7603139, EPI_ISL_7603140, EPI_ISL_7604317, EPI_ISL_7604355, EPI_ISL_7604363, EPI_ISL_7613573, EPI_ISL_7614184, EPI_ISL_7614185, EPI_ISL_7614286, EPI_ISL_7614287 | Shamir Medical Center (Asaf Harofe)                                                                      | Shamir Medical Center (Asaf Harofe)                                                                                            | Abu Hamad Ramzia; Adina Bar Chaim; Alona Frenkel; Anna Visnjevsky; Chen Weiner; Nir Rainy; Patricia Benveniste-Lekovitz; Reut Sorek Abramovich; Yevgeni Yegorov                                                                                                                                                                                                                                                                                                                                 |
| EPI_ISL_7062525, EPI_ISL_7405371                                                                                                                                                                                                                                                                                                                                                                                                                                                                                                                                                                                                                                                                                                                          | Spital Riggisberg                                                                                        | Institute for Infectious Diseases, University of Bern                                                                          | Alban Ramette; Christian Baumann; Cora Sägesser; Franziska Suter-Rinkler; Loïc Borcard; Miguel A Terrazos Miani; Nicole Liechti; Pascal Bittet; Peter Keller; Sonja Gempeler; Stefan Neuschwander; Stephen L Leib                                                                                                                                                                                                                                                                               |
| EPI_ISL_6963509                                                                                                                                                                                                                                                                                                                                                                                                                                                                                                                                                                                                                                                                                                                                           | Sri Jayawade Institute of Cardiovascular Sciences and Research / Strand Life Sciences                    | National Centre for Biological Sciences, TIFR - Rockefeller Foundation                                                         | Aarati Karaba; Anson Kunjumon George; Aparnaa Ramanathan; Apurva Sarin; Chandrasekar Vadlamudi; Chitra Pattabiraman; Darshan Sreenivas; Dasaradhi Palakodetti; Dimple Notani; Divya Priya A; Madhusudhan J; Manisha Bhardwaj; Manoj Kumar Jha; Mudasi Nazara; Pradeep B P; Priyanka Ananta Mulay; Ramesh Hariharan; Rohan Pais; Satyajit Mayor; Samritia Mardikar; Srivathsan Adimodam; Uma Ramakrishnan; Vamsi Veeramachaneni; Vasanthapuram Ravi; Vijay Chandru; Vishal G Rao; Yasodha Kannan |
| EPI_ISL_7265233                                                                                                                                                                                                                                                                                                                                                                                                                                                                                                                                                                                                                                                                                                                                           | St Vincent's Pathology (SydPath)                                                                         | NSW Health Pathology - Institute of Clinical Pathology and Medical Research; Westmead Hospital; University of Sydney           | Arnott A.; Draper J.; Gall M.; Martinez E.; Rockett R.; Sintchenko V.; on behalf of ICPMR                                                                                                                                                                                                                                                                                                                                                                                                       |

|                                                                                                                                                                                                                                                                                                                                                                     |                                                                    |                                                                                                   |                                                                                                                                                                                                                                                                                                                                                                                                                                                                                                                                                                                                                                                                                                                                            |
|---------------------------------------------------------------------------------------------------------------------------------------------------------------------------------------------------------------------------------------------------------------------------------------------------------------------------------------------------------------------|--------------------------------------------------------------------|---------------------------------------------------------------------------------------------------|--------------------------------------------------------------------------------------------------------------------------------------------------------------------------------------------------------------------------------------------------------------------------------------------------------------------------------------------------------------------------------------------------------------------------------------------------------------------------------------------------------------------------------------------------------------------------------------------------------------------------------------------------------------------------------------------------------------------------------------------|
| EPI_ISL_7170972                                                                                                                                                                                                                                                                                                                                                     | Stadtsptal Triemli                                                 | Institute of Medical Virology                                                                     | Alexandra Trkola; Annette Audigé; Cyril Shah; Gabriela Ziltener; Guido Bloembergen; Jon Huder; Jürg Böni; Kevin Steiner; Maria Grünberg; Maryam Zaheri; Michael Huber; Riccarda Capaul; Stefan Schmutz; Verena Kufner                                                                                                                                                                                                                                                                                                                                                                                                                                                                                                                      |
| EPI_ISL_6971472, EPI_ISL_7632035, EPI_ISL_7632045                                                                                                                                                                                                                                                                                                                   | Stadtsptal Triemli                                                 | Institute of Medical Virology, University of Zurich                                               | Alexandra Trkola; Annette Audigé; Catharine Aquino; Cyril Shah; Daniel Ehrsam; Gabriela Ziltener; Guido Bloembergen; Hubert Rehrauer; Isabel Stürmer; Joel Wirz; Jon Huder; Jürg Böni; Kevin Steiner; Maria Grünberg; Maryam Zaheri; Michael Huber; Riccarda Capaul; Stefan Schmutz; Verena Kufner; Weihong Qi                                                                                                                                                                                                                                                                                                                                                                                                                             |
| EPI_ISL_7445855                                                                                                                                                                                                                                                                                                                                                     | State Hygienic Laboratory at the University of Iowa                | State Hygienic Laboratory at the University of Iowa                                               | Alankar Kampooowale; Anna Yakos; Cindy Toll; Davis Rieckenberg; Erik Twait; Jeff Benfer; Kris Eveland; Krishnaveni Sompallae; Kristen Zanon; Mariah Knutson; Mohammed Allam; Valerie Reeb; Wes Hottel                                                                                                                                                                                                                                                                                                                                                                                                                                                                                                                                      |
| EPI_ISL_7013425, EPI_ISL_7264087, EPI_ISL_7264088, EPI_ISL_7456351, EPI_ISL_7456393, EPI_ISL_7456394, EPI_ISL_7456395, EPI_ISL_7456396, EPI_ISL_7456397, EPI_ISL_7456398, EPI_ISL_7456399, EPI_ISL_7456400, EPI_ISL_7620798, EPI_ISL_7620819                                                                                                                        | see above                                                          | State Laboratories Division, Hawaii State Department of Health                                    | Ayana Garnet; Daniel Strange; Drew Kuwazaki; Edward Desmond; Pamela O'Brien; Razvan Sultana                                                                                                                                                                                                                                                                                                                                                                                                                                                                                                                                                                                                                                                |
| EPI_ISL_7544013, EPI_ISL_7544494, EPI_ISL_7544584, EPI_ISL_7544730                                                                                                                                                                                                                                                                                                  | Study: Rapid Diag POC Covid                                        | NHLS/UCT                                                                                          | Arash Iranzadeh; Bruna Galvao; Carolyn Williamson; Deelan Doolabh; Diana Hardie; Gert Marais; Innocent Mudau; Luicer Olubayo; Lynn Tyers; Marvin Hsiao; Nokuzola Mbhele; Rageema Joseph; Stephen Korsman                                                                                                                                                                                                                                                                                                                                                                                                                                                                                                                                   |
| EPI_ISL_7364700, EPI_ISL_7364701, EPI_ISL_7364702                                                                                                                                                                                                                                                                                                                   | Summit Clinical Laboratories                                       | City of Milwaukee Health Department Laboratory                                                    | Amy Bauer; Manjeet Khubbar; Samantha Scott; Sanbij Bhattacharyya                                                                                                                                                                                                                                                                                                                                                                                                                                                                                                                                                                                                                                                                           |
| EPI_ISL_6883250, EPI_ISL_7452246, EPI_ISL_7452247                                                                                                                                                                                                                                                                                                                   | Swedish national genomic surveillance program of SARS-CoV-2        | The Public Health Agency of Sweden                                                                | Alma Brolund; Maria Lind Karlberg; Maximilian Riess; Swedish national genomic surveillance program of SARS-CoV-2                                                                                                                                                                                                                                                                                                                                                                                                                                                                                                                                                                                                                           |
| EPI_ISL_7457427, EPI_ISL_7457428, EPI_ISL_7457429, EPI_ISL_7457430, EPI_ISL_7457431                                                                                                                                                                                                                                                                                 | Synlab Medilab                                                     | Karolinska University Hospital Huddinge                                                           | Annika Tiveljung Lindell; Henning Onsbring; Jan Albert; Karina Hentrich; Lynda Eneh; Martin Ekman; Natalia Gerasimcik; Robert Drydak; Sandra Broddesson; Shambhu Ganeshappa Aralaguppe; Tanja Normark; Tobias Allander; Valtteri Wirta; Zhibing Yun                                                                                                                                                                                                                                                                                                                                                                                                                                                                                        |
| EPI_ISL_7605688                                                                                                                                                                                                                                                                                                                                                     | TINTSWALO LABORATORY                                               | National Institute for Communicable Diseases of the National Health Laboratory Service            | Amoako DG; Bhiman JN; Everatt J; Ismail A; Mahlangu B; Mnguni A; Mohale T; Ntuli N; Scheepers C; Wolter N                                                                                                                                                                                                                                                                                                                                                                                                                                                                                                                                                                                                                                  |
| EPI_ISL_7605589, EPI_ISL_7605602, EPI_ISL_7605603, EPI_ISL_7605604, EPI_ISL_7605605, EPI_ISL_7605606, EPI_ISL_7605608, EPI_ISL_7605609, EPI_ISL_7605613, EPI_ISL_7605614, EPI_ISL_7605615, EPI_ISL_7605616, EPI_ISL_7605620, EPI_ISL_7605621, EPI_ISL_7605623, EPI_ISL_7605665, EPI_ISL_7605684, EPI_ISL_7605713, EPI_ISL_7605746, EPI_ISL_7605747, EPI_ISL_7605766 | see above                                                          | TSHEPONG LABORATORY                                                                               | Amoako DG; Bhiman JN; Everatt J; Ismail A; Mahlangu B; Mnguni A; Mohale T; Ntuli N; Scheepers C; Wolter N                                                                                                                                                                                                                                                                                                                                                                                                                                                                                                                                                                                                                                  |
| EPI_ISL_7605805                                                                                                                                                                                                                                                                                                                                                     | TXDSHS                                                             | TXDSHS                                                                                            | Anita Pokharel; Bonnie Oh; Chun Wang; Grace Kubin; Karen Bobier; Maliha Rahman; Mayela Pedrueza; Rachel Lee; Rashmi Tuladhar                                                                                                                                                                                                                                                                                                                                                                                                                                                                                                                                                                                                               |
| EPI_ISL_7456440                                                                                                                                                                                                                                                                                                                                                     | Tambo Memorial Laboratory                                          | National Institute for Communicable Diseases of the National Health Laboratory Service            | Amoako DG; Bhiman JN; Everatt J; Ismail A; Mahlangu B; Mnguni A; Mohale T; Ntuli N; Scheepers C; Wolter N                                                                                                                                                                                                                                                                                                                                                                                                                                                                                                                                                                                                                                  |
| EPI_ISL_7571540                                                                                                                                                                                                                                                                                                                                                     | Temporary Specimen Collection Centre at the AsiaWorld-Expo         | Hong Kong Department of Health                                                                    | Alan K.L. Tsang; Edman T.K. Lam; Ken H.L. Ng; Patricia K. L. Leung; Peter C.W. Yip; Rickjason C.W. Chan                                                                                                                                                                                                                                                                                                                                                                                                                                                                                                                                                                                                                                    |
| EPI_ISL_6825551                                                                                                                                                                                                                                                                                                                                                     | Territory Pathology                                                | Territory Pathology                                                                               | Dimitrios Menouhos; Ella Meumann; Robert Baird                                                                                                                                                                                                                                                                                                                                                                                                                                                                                                                                                                                                                                                                                             |
| EPI_ISL_7171744                                                                                                                                                                                                                                                                                                                                                     | The Hope Clinic of Emory Vaccine Center, Emory University          | Piantadosi Lab, Emory Department of Pathology                                                     | Anne Piantadosi; Azman Taz; Dara Khosravi; Ethan Wang; Jesse Waggoner; Ludy Carmola; Marybeth Sexton; Nadine Rouphael                                                                                                                                                                                                                                                                                                                                                                                                                                                                                                                                                                                                                      |
| EPI_ISL_7446810                                                                                                                                                                                                                                                                                                                                                     | Thüringer Landesamtes für Verbraucherschutz                        | Robert Koch Institute                                                                             |                                                                                                                                                                                                                                                                                                                                                                                                                                                                                                                                                                                                                                                                                                                                            |
| EPI_ISL_7235629                                                                                                                                                                                                                                                                                                                                                     | Tulane University School of Medicine                               | Tulane University School of Medicine                                                              | Di Tian                                                                                                                                                                                                                                                                                                                                                                                                                                                                                                                                                                                                                                                                                                                                    |
| EPI_ISL_7505962                                                                                                                                                                                                                                                                                                                                                     | UC Davis Genome Center                                             | UC Davis Genome Center                                                                            | Healthy Davis Together; UC Davis                                                                                                                                                                                                                                                                                                                                                                                                                                                                                                                                                                                                                                                                                                           |
| EPI_ISL_7451261                                                                                                                                                                                                                                                                                                                                                     | UNILABS                                                            | Instituto Nacional de Saude (INSA)                                                                | Borges et al                                                                                                                                                                                                                                                                                                                                                                                                                                                                                                                                                                                                                                                                                                                               |
| EPI_ISL_7160037, EPI_ISL_7160038, EPI_ISL_7160039, EPI_ISL_7545422, EPI_ISL_7545422, EPI_ISL_7545423, EPI_ISL_7545424                                                                                                                                                                                                                                               | see above                                                          | UW Virology Lab                                                                                   | Alexander Greninger; Hong Xie; Isabel Arnold; Keith R Jerome; Meili Huang; Nathan Breit; Patrick Mathias; Pavitra Roychoudhury; Pooneh Hajian; Ricardo Perez; Robert J. Livingston; Saraswathi Sathees; Sean Ellis; Seffir T. Wendm; Shah Mohamed Bakhsh; Tien V. Nguyen                                                                                                                                                                                                                                                                                                                                                                                                                                                                   |
| EPI_ISL_7544861, EPI_ISL_7631788                                                                                                                                                                                                                                                                                                                                    | Unilabs                                                            | Institute of Medical Virology, University of Zurich                                               | Alexandra Trkola; Annette Audigé; Catharine Aquino; Cyril Shah; Daniel Ehrsam; Gabriela Ziltener; Guido Bloembergen; Hubert Rehrauer; Isabel Stürmer; Joel Wirz; Jon Huder; Jürg Böni; Kevin Steiner; Maria Grünberg; Maryam Zaheri; Michael Huber; Riccarda Capaul; Stefan Schmutz; Verena Kufner; Weihong Qi                                                                                                                                                                                                                                                                                                                                                                                                                             |
| EPI_ISL_7470330, EPI_ISL_7470341                                                                                                                                                                                                                                                                                                                                    | Unilabs Laboratory Medicine                                        | Norwegian Institute of Public Health, Department of Virology                                      | Atiya R Ali; Debeh Nadia; Engebretsen Serina Beate; Garcia Llorente Ignacio; Hilde Elshaug; Hilde Volla; Jon Bråte; Kamilla Heddeland; Insteferd; Karoline Bragstad; Kathrine Stene-Johansen; Line Victoria Moen; Marie Paulsen Madsen; Olav Hungnes; Pedersen Benedikte Nevjen; Rasmus Rils Kopperud                                                                                                                                                                                                                                                                                                                                                                                                                                      |
| EPI_ISL_7141056                                                                                                                                                                                                                                                                                                                                                     | Unipath Speciality Laboratory Limited, Ahmedabad                   | Gujarat Biotechnology Research Centre                                                             | Apurvashin Puvar; Bhadrashin Gohil; Chaitanya Joshi; Dinesh Kumar; Janvi Raval; Jwalant Shah; Madhvi Joshi; Nimesh Patel; Nitin Savaliya; Nitin Shukla; Priyank Chavda; Ramesh Pandit; Sonal Sharma; Zarna Patel                                                                                                                                                                                                                                                                                                                                                                                                                                                                                                                           |
| EPI_ISL_7613414                                                                                                                                                                                                                                                                                                                                                     | University Hospital, San Antonio                                   | STRL UT Health San Antonio, Greehey Children's Cancer Research Institute                          | Bethany Landry; Dawn Garcia; Guillermo Nunez; Hongxin Fan; Josefine Stoever; Korri Weldon; Kumari Vadlamudi; Marjorie Parker David; San Antonio Metropolitan Health District; Texas Department of State Health Services; Weijing He; Yidong Chen; Zhao Lai; Zhenqing Ye                                                                                                                                                                                                                                                                                                                                                                                                                                                                    |
| EPI_ISL_7605542, EPI_ISL_7605543, EPI_ISL_7605546, EPI_ISL_7605547                                                                                                                                                                                                                                                                                                  | University Hospitals of Geneva, Laboratory of Virology             | HUG, Laboratory of Virology and the Health2030 Genome Center                                      | Aline Mamin; Ana Rita Goncalves; Cedric Howald; Deborah Penet; Francisco Perez; Henri Pegeot; Ioannis Xenarios; Keith Harshman; Laurent Kaiser; Lorenzo Cerutti; Melysa Elies; Samuel Cordey                                                                                                                                                                                                                                                                                                                                                                                                                                                                                                                                               |
| EPI_ISL_7542255                                                                                                                                                                                                                                                                                                                                                     | University Medical Center Hamburg Eppendorf                        | Heinrich Pette Institute, Leibniz Institute for Experimental Virology                             | Adam Grundhoff; Alexis Robitaille; Johannes Knobloch; Martin Aepfelbacher; Nicole Fischer; Thomas Günther                                                                                                                                                                                                                                                                                                                                                                                                                                                                                                                                                                                                                                  |
| EPI_ISL_6929785, EPI_ISL_7195724, EPI_ISL_7195725, EPI_ISL_7195726, EPI_ISL_7405404, EPI_ISL_7405405, EPI_ISL_7405406, EPI_ISL_7405407, EPI_ISL_7405408, EPI_ISL_7405409, EPI_ISL_7405412, EPI_ISL_7462253, EPI_ISL_7462258, EPI_ISL_7462265, EPI_ISL_7462271, EPI_ISL_7601672                                                                                      | see above                                                          | GIGA Medical Genomics                                                                             | Bouchra Boujemla; Claire Gourzonès; Cécile Meex; Keith Durkin; Laurent Gillet; Maria Artesi; Marie-Pierre Hayette; Nadine Cambisano; Nathalie Renotte; Olivier Ek; Sébastien Bontems; Vincent Bours                                                                                                                                                                                                                                                                                                                                                                                                                                                                                                                                        |
| EPI_ISL_7379462                                                                                                                                                                                                                                                                                                                                                     | University of Wisconsin-Madison AIDS Vaccine Research Laboratories | University of Wisconsin-Madison AIDS Vaccine Research Laboratories                                | Gage Moreno; Katarina Braun; et al. AIDS Vaccine Research Laboratories                                                                                                                                                                                                                                                                                                                                                                                                                                                                                                                                                                                                                                                                     |
| EPI_ISL_7605921, EPI_ISL_7605979                                                                                                                                                                                                                                                                                                                                    | Universität Zürich                                                 | Institute of Medical Virology, University of Zurich                                               | Alexandra Trkola; Annette Audigé; Catharine Aquino; Cyril Shah; Daniel Ehrsam; Gabriela Ziltener; Guido Bloembergen; Hubert Rehrauer; Isabel Stürmer; Joel Wirz; Jon Huder; Jürg Böni; Kevin Steiner; Maria Grünberg; Maryam Zaheri; Michael Huber; Riccarda Capaul; Stefan Schmutz; Verena Kufner; Weihong Qi                                                                                                                                                                                                                                                                                                                                                                                                                             |
| EPI_ISL_7544862, EPI_ISL_7544872, EPI_ISL_7631828                                                                                                                                                                                                                                                                                                                   | UniversitätsSpital Zürich                                          | Institute of Medical Virology, University of Zurich                                               | Alexandra Trkola; Annette Audigé; Catharine Aquino; Cyril Shah; Daniel Ehrsam; Gabriela Ziltener; Guido Bloembergen; Hubert Rehrauer; Isabel Stürmer; Joel Wirz; Jon Huder; Jürg Böni; Kevin Steiner; Maria Grünberg; Maryam Zaheri; Michael Huber; Riccarda Capaul; Stefan Schmutz; Verena Kufner; Weihong Qi                                                                                                                                                                                                                                                                                                                                                                                                                             |
| EPI_ISL_7418452, EPI_ISL_7418453, EPI_ISL_7418454, EPI_ISL_7418455, EPI_ISL_7418456, EPI_ISL_7418463, EPI_ISL_7418464, EPI_ISL_7418465                                                                                                                                                                                                                              | see above                                                          | Robert Koch Institute                                                                             |                                                                                                                                                                                                                                                                                                                                                                                                                                                                                                                                                                                                                                                                                                                                            |
| EPI_ISL_7136300, EPI_ISL_7136771, EPI_ISL_7336152, EPI_ISL_7503247                                                                                                                                                                                                                                                                                                  | Utah Public Health Laboratory                                      | Utah Public Health Laboratory                                                                     | Erin L. Young; John Arnn; Kelly F. Oakeson; Olinto Linares-Perdomo; Pooja Gupta; Tom Iverson                                                                                                                                                                                                                                                                                                                                                                                                                                                                                                                                                                                                                                               |
| EPI_ISL_7261603                                                                                                                                                                                                                                                                                                                                                     | VA Tampa Healthcare System                                         | VHA Public Health Reference Laboratory                                                            | Mark Holodniy on behalf of VA SEQFORCE; US Department of Veterans Affairs                                                                                                                                                                                                                                                                                                                                                                                                                                                                                                                                                                                                                                                                  |
| EPI_ISL_6989662                                                                                                                                                                                                                                                                                                                                                     | Vault Health                                                       | Minnesota Department of Health, Public Health Laboratory                                          | Alyssa Mondelli; Elizabeth Horn; Jacob Garfin; Kelly Pung; Matt Plumb; Sarah Namugenyi; and Xiong Wang                                                                                                                                                                                                                                                                                                                                                                                                                                                                                                                                                                                                                                     |
| EPI_ISL_7398681, EPI_ISL_7398758                                                                                                                                                                                                                                                                                                                                    | Vichaivej International Hospital Nongkhaem                         | National Institute of Health, Department of Medical Sciences, Ministry of Public Health, Thailand | Archawin Rojanawitwat; Ballang Uppapong; Beth Skaggs; Donlaya Maunplueng; Kazuhisa Okada; Natchaya Khiaadong; Nuttida Thongpramul; Pakorn Piromtong; Pilakul Akkapaiboon Okada; Piroon Jenjaroenpun; Pongpun Sawatwong; Prapat Suriyaphol; Sirinkanda Wimo; Siripaporn Phuygun; Sitiporn Panmen; Supakit Sirak; Suratchana Mitrat; Thanutsapa Thanadachakul; Thidathip Wongsurawat                                                                                                                                                                                                                                                                                                                                                         |
| EPI_ISL_7224567, EPI_ISL_7224577                                                                                                                                                                                                                                                                                                                                    | Viollier AG                                                        | Clinical Bacteriology, University Hospital Basel                                                  | Adrian Egli; Alfredo Mari; Christiane Beckmann; Fanny Wegner; Hans Hirsch; Helena MB Seth-Smith; Julia Bielicki; Karoline Leuzinger; Manuel Battegay; Tim Roloff                                                                                                                                                                                                                                                                                                                                                                                                                                                                                                                                                                           |
| EPI_ISL_7371749, EPI_ISL_7371751, EPI_ISL_7372207, EPI_ISL_7566519, EPI_ISL_7566755, EPI_ISL_7566802, EPI_ISL_7566826, EPI_ISL_7566947, EPI_ISL_7620490, EPI_ISL_7620538, EPI_ISL_7620551, EPI_ISL_7620714, EPI_ISL_7620766                                                                                                                                         | see above                                                          | Viollier AG                                                                                       | Andrea Patrignani; Andrea Patrizia Salzmann; Andrea Cabral de Gouvea; Catharine Aquino; Catharine Aquino Fournier; Chaoan Chen; Christian Beisel; Christian Urban; Christiane Beckmann; Christoph Noppen; Daniel Ehrsam; David Drefuss; Doris Popovic; Elodie Burcklen; Franziska Singer; Griffin White; Hai Bui; Henriette Kurth; Ina Nissen; Isabel Stürmer; Ivan Topolicky; Jay Tracy; Kim Philipp Jablonski; Lara Fuhrmann; Laura Nef; Lennart Opitz; Louis du Plessis; Maria Domenica Mocca; Matteo Carrara; Maurice Redondo; Mirjam Feldkamp; Natascha Santacroce; Niko Beerenwinkel; Olivier Kobel; Pelin Icer; Ralph Schlapbach; Rebecca Denes; Sarah Nadeau; Shuqing Yu; Simon Grüter; Tanja Stadler; Timothy Sykes; Tobias Schär |

|                                                                                                                                                                                                                                                                                                                                                                                                                                                                                                                                                                                                                                                                                                                                                                                                                                                                                                                                                                                                                                                                                                                                |                            |                                                                                                                         |                                                                                                                                              |                                                                                                                                                                                                                                                                                                                                                                                                                                                                                                                                                          |
|--------------------------------------------------------------------------------------------------------------------------------------------------------------------------------------------------------------------------------------------------------------------------------------------------------------------------------------------------------------------------------------------------------------------------------------------------------------------------------------------------------------------------------------------------------------------------------------------------------------------------------------------------------------------------------------------------------------------------------------------------------------------------------------------------------------------------------------------------------------------------------------------------------------------------------------------------------------------------------------------------------------------------------------------------------------------------------------------------------------------------------|----------------------------|-------------------------------------------------------------------------------------------------------------------------|----------------------------------------------------------------------------------------------------------------------------------------------|----------------------------------------------------------------------------------------------------------------------------------------------------------------------------------------------------------------------------------------------------------------------------------------------------------------------------------------------------------------------------------------------------------------------------------------------------------------------------------------------------------------------------------------------------------|
| EPI_ISL_7509012, EPI_ISL_7509019, EPI_ISL_7509025, EPI_ISL_7509030, EPI_ISL_7561327, EPI_ISL_7561395, EPI_ISL_7561411, EPI_ISL_7561414, EPI_ISL_7561423, EPI_ISL_7561425, EPI_ISL_7561434, EPI_ISL_7561441, EPI_ISL_7561446, EPI_ISL_7561454, EPI_ISL_7561464, EPI_ISL_7561472, EPI_ISL_7561477, EPI_ISL_7561482                                                                                                                                                                                                                                                                                                                                                                                                                                                                                                                                                                                                                                                                                                                                                                                                               | see above                  | Virology Department, Royal Infirmary of Edinburgh, NHS Lothian / School of Biological Sciences, University of Edinburgh | COVID-19 Genomics UK (COG-UK) Consortium                                                                                                     | Colquhoun R; Cotton S; Dewar R; Fernandez G; Gallagher A; Hill V; Jackson B; Maloney D; McCrone JT; McHugh M; O'Toole Á; Rambaut A; Scher E; Templeton K; Yu X                                                                                                                                                                                                                                                                                                                                                                                           |
| EPI_ISL_7285844, EPI_ISL_7285845, EPI_ISL_7285846, EPI_ISL_7285847, EPI_ISL_7285848                                                                                                                                                                                                                                                                                                                                                                                                                                                                                                                                                                                                                                                                                                                                                                                                                                                                                                                                                                                                                                            |                            | Virology Laboratory, Scientific Department, Army Medical Center                                                         | Virology Laboratory, Scientific Department, Army Medical Center                                                                              | Anella Monte; Anna Anselmo; Antonella Fortunato; Filippo Molinari; Florio Lista; Francesco Giordani; Giancarlo Petralito; Giandomenico Cerreto; Giulia Campoli; Lucia Nicosia; Marzia Cavalli; Pietro Marco D'Angelo; Riccardo De Sanctis; Rossella Brandi; Silvia Fillo; Vanessa Vera Fain                                                                                                                                                                                                                                                              |
| EPI_ISL_7503508, EPI_ISL_7503509, EPI_ISL_7548944, EPI_ISL_7548945, EPI_ISL_7501188                                                                                                                                                                                                                                                                                                                                                                                                                                                                                                                                                                                                                                                                                                                                                                                                                                                                                                                                                                                                                                            |                            | Washington State Department of Health Public Health Laboratories Wexner Medical Center                                  | Washington State Department of Health Public Health Laboratories OSU College of Medicine                                                     | Alex Latham; Ardizon Valdez; Avi Singh; Claire Howell; Denny Russell; Drew MacKellar; Holly Halstead; JohnAric Peterson; Kathryn Sickles; Kristin Roche; Lisa Jones; Philip Dykema; Rebecca Cao                                                                                                                                                                                                                                                                                                                                                          |
| EPI_ISL_7263803                                                                                                                                                                                                                                                                                                                                                                                                                                                                                                                                                                                                                                                                                                                                                                                                                                                                                                                                                                                                                                                                                                                |                            | Winchester Hospital via Lahey Hospital                                                                                  | New England Biolabs                                                                                                                          | Corcoran, S.; Koenig, S.                                                                                                                                                                                                                                                                                                                                                                                                                                                                                                                                 |
| EPI_ISL_7478524, EPI_ISL_7478525, EPI_ISL_7478526, EPI_ISL_7478527, EPI_ISL_7478529, EPI_ISL_7478530, EPI_ISL_7502154, EPI_ISL_7502155                                                                                                                                                                                                                                                                                                                                                                                                                                                                                                                                                                                                                                                                                                                                                                                                                                                                                                                                                                                         |                            | Wisconsin State Laboratory of Hygiene Communicable Disease Division                                                     | Wisconsin State Laboratory of Hygiene Communicable Disease Division                                                                          | Abel, G.; B.W.; C.J.; Colgrove, R.; Duncan, R.; Elfahal, M.; Flynn; Heim, K.; Karolidis, M.; L. and Langhorst; Michaels, L.; Pinet, K.; Skelton, T.; Sun                                                                                                                                                                                                                                                                                                                                                                                                 |
| see above                                                                                                                                                                                                                                                                                                                                                                                                                                                                                                                                                                                                                                                                                                                                                                                                                                                                                                                                                                                                                                                                                                                      | Yale Clinical Virology Lab | Grubaugh Lab - Yale School of Public Health                                                                             |                                                                                                                                              | Anderson Brito; Chaney Kalinich; Chantal Vogels; Isabel Ott; Joseph Fauver; Kendall Billig; Mallery Breban; Marie L. Landry; Mary Petrone; Nathan Grubaugh; Tobias Koch                                                                                                                                                                                                                                                                                                                                                                                  |
| EPI_ISL_7472293                                                                                                                                                                                                                                                                                                                                                                                                                                                                                                                                                                                                                                                                                                                                                                                                                                                                                                                                                                                                                                                                                                                | Yale Pathology Labs        | Yale Pathology Labs                                                                                                     |                                                                                                                                              | Angelle Levi; Brian Daley; Chen Liu; Guangxiao Yang; Heidi Herrick; Jianhui Wang; Jinglan Wang; John Sinar; Katherine Fajardo; Kevin Schofield; Laura Brady; Michael Stankewich; Minghao Zhong; Monica Talmor; Pei Hui; Peter Gershkovich; Richard Bouffard; Stephanie Weirsmann; Susan Bell; Sylvia White                                                                                                                                                                                                                                               |
| EPI_ISL_6795833, EPI_ISL_6795834, EPI_ISL_6795835, EPI_ISL_6795836, EPI_ISL_6795837, EPI_ISL_6795838, EPI_ISL_6795839, EPI_ISL_6795840, EPI_ISL_6795841, EPI_ISL_6795842, EPI_ISL_6795844, EPI_ISL_6795845, EPI_ISL_6795846, EPI_ISL_6795847, EPI_ISL_6795848, EPI_ISL_6795849, EPI_ISL_6795850, EPI_ISL_6825389, EPI_ISL_6825390, EPI_ISL_6825391, EPI_ISL_6825392, EPI_ISL_6825393, EPI_ISL_6825394, EPI_ISL_6825395, EPI_ISL_6825396, EPI_ISL_6825397, EPI_ISL_6825398, EPI_ISL_7015172, EPI_ISL_7015173, EPI_ISL_7015174, EPI_ISL_7015175, EPI_ISL_7015176, EPI_ISL_7015177, EPI_ISL_7015178, EPI_ISL_7015179, EPI_ISL_7015180, EPI_ISL_7015181, EPI_ISL_7015182, EPI_ISL_7015183, EPI_ISL_7015184, EPI_ISL_7015185, EPI_ISL_7015186, EPI_ISL_7015187, EPI_ISL_7015188, EPI_ISL_7015189, EPI_ISL_7015190, EPI_ISL_7015191, EPI_ISL_7015192, EPI_ISL_7015193, EPI_ISL_7015194, EPI_ISL_7015195, EPI_ISL_7015196, EPI_ISL_7015197, EPI_ISL_7015198, EPI_ISL_7015199, EPI_ISL_7015200, EPI_ISL_7015201, EPI_ISL_7015202, EPI_ISL_7015203, EPI_ISL_7015204, EPI_ISL_7015205, EPI_ISL_7015206, EPI_ISL_7015207, EPI_ISL_7015208 | see above                  | ZARV/NHLS, Department Medical Virology, University of Pretoria                                                          | CERI, Centre for Epidemic Response and Innovation, Stellenbosch University and KRISP, KZN Research Innovation and Sequencing Platform, UKZN. | Adriano Mendes; Amoaka D; Amy Strydom; Arisha Maharaj; Bester P; Bhiman J; Engelbrecht S; Everatt J; Glandhari J; Goedhals D; Hardie D; Hsiao M; Iranzadeh A; Lessells R; Makatini Z; Maponga T; Mdolose N; Micheala Davids; Misana K; Moir M; NGS-SA (Scheepers C; Naidoo Y; Nyaga M) Glandhari J; Oluwakemi M; Pillay S; Preiser W; Ramphal U; Ramphal Y; San JE; Sim Mayaphi and Marietjie Venter; Tegally H; Tshiabula D; Venter M; Wilkinson E; Williamson C; de Oliveira T; von Gottberg A                                                         |
| EPI_ISL_7548959, EPI_ISL_7548966, EPI_ISL_7549083                                                                                                                                                                                                                                                                                                                                                                                                                                                                                                                                                                                                                                                                                                                                                                                                                                                                                                                                                                                                                                                                              |                            | ZOTZ KLIMAS MVZ Düsseldorf- Centrum für Urologie, Pathologie                                                            | Center of Medical Microbiology, Virology, and Hospital Hygiene, University of Duesseeldorf                                                   | Alexander Dilthey; Andreas Walker; Daniel Strekow; Jessica Nicola; Jörg Timm; Katrin Hoffmann; Klaus Pfeffer; Lisanna Hülse; Malte Kohns Vasconcelos; Maximilian Damagnez; Nadine Lübke; Patrick Finzer; Rainer Zotz; Tobias Wienemann; Torsten Houwaart                                                                                                                                                                                                                                                                                                 |
| EPI_ISL_7544865                                                                                                                                                                                                                                                                                                                                                                                                                                                                                                                                                                                                                                                                                                                                                                                                                                                                                                                                                                                                                                                                                                                |                            | Zentrallabor Zürich                                                                                                     | Institute of Medical Virology, University of Zurich                                                                                          | Alexandra Trkola; Annette Audigé; Cyril Shah; Gabriela Zlotener; Guido Bloembergen; Jon Huder; Jürg Böni; Kevin Steiner; Maria Grünberg; Maryam Zaheri; Michael Huber; Riccarda Capaul; Stefan Schmutz; Verena Kufner                                                                                                                                                                                                                                                                                                                                    |
| EPI_ISL_7423603                                                                                                                                                                                                                                                                                                                                                                                                                                                                                                                                                                                                                                                                                                                                                                                                                                                                                                                                                                                                                                                                                                                |                            | amedes MVZ für Laboratoriumsdiagnostik Raubling GmbH                                                                    | Robert Koch Institute                                                                                                                        |                                                                                                                                                                                                                                                                                                                                                                                                                                                                                                                                                          |
| EPI_ISL_7368223, EPI_ISL_7594806                                                                                                                                                                                                                                                                                                                                                                                                                                                                                                                                                                                                                                                                                                                                                                                                                                                                                                                                                                                                                                                                                               |                            | labor team w AG                                                                                                         | Department of Biosystems Science and Engineering, ETH Zürich                                                                                 | Andrea Patrignani; Andreas Lindauer; Andreia Cabral de Gouvea; Catharine Aquino; Catharine Aquino Fournier; Chaoran Chen; Christian Urban; Daniel Ehram; David Dreifuss; Doris Popovic; Franziska Singer; Griffin White; Hai Bul; Isabel Stürmer; Ivan Topolsky; Jay Tracy; Kim Philipp Jablonski; Lara Fuhrmann; Laura Neff; Lennart Opitz; Louis du Plessis; Maria Domenica Moccia; Matteo Carrara; Monika Bucher; Niko Beerenwinkel; Pelin Icer; Ralph Schlapbach; Rebekka Pohl; Sarah Nadeau; Shuqing Yu; Simon Gruter; Tanja Stadler; Timothy Sykes |
